# Supplementary material for: Application and assessment of deep learning for the generation of potential NMDA receptor antagonists
Source: Royal Society of Chemistry journal article supplement (doi:10.1039/d0cp03620j), 2020-12-08
Supplement: d0cp03620j2.xlsx [file d0cp03620j2.xlsx]

## Sheet: Candidate_a
Candidate Antagonist SMILES	Metabolite SMILES	Mode of Generation
CCC1C2CCC31C2(N=S)CC(=N3)C	CCC1C2CCC13N=C(CO)CC23N=S	Hydroxylation of methyl carbon adjacent to aliphatic ring
	CC1=NC23CCC(C2C(C)O)C3(N=S)C1	Hydroxylation of penultimate aliphatic secondary carbon
	CC1=NC23CCC(C2CCO)C3(N=S)C1	Hydroxylation of terminal methyl
	C=CC1C2CCC13N=C(C)CC23N=S	Terminal desaturation

## Sheet: Candidate_b
Candidate Antagonist SMILES	Metabolite SMILES	Mode of Generation
COC1CCC(N=C1)CC1C=C1SC	COC1C=NC(C(O)C2C=C2SC)CC1	Hydroxylation of acyclic aliphatic secondary carbon
	CSC1=CC1CC1CCC(O)C=N1	O-Dealkylation of dialkylether

## Sheet: Candidate_c
Candidate Antagonist SMILES	Metabolite SMILES	Mode of Generation
N#CCC=C1SC2CCCC1(C)COC2	CC12CCCC(COC1)S/C2=C/CC(=O)O	Degradation of nitrile to carboxylic acid
	CC12CCCC(COC1)S/C2=C/CC(=O)O	Degradation of aliphatic nitrile to carboxylic acid
	CC12CCCC(COC1)S/C2=C/CC(=O)OC1OC(C(=O)O)C(O)C(O)C1O	O-Glucuronidation of aliphatic acid

## Sheet: Candidate_d
Candidate Antagonist SMILES	Metabolite SMILES	Mode of Generation
CCSCCCC1=NCC=NCCC1C	CCSCCC/C1=N\C/C=N\CCC1CO	Hydroxylation of methyl carbon adjacent to aliphatic ring
	CCSCCC/C1=N\C/C=N\CCC1(C)O	Hydroxylation of penultimate aliphatic tertiary carbon
	CCS(=O)CCC/C1=N\C/C=N\CCC1C	S-Oxidation of dialkylthioether to sulfoxide
	CC1CC/N=C\C/N=C/1CCCSCCO	Hydroxylation of terminal methyl
	CCSCCC/C1=N\C(O)/C=N\CCC1C	Hydroxylation of heteroalicyclic secondary carbon
	CCSCCC/C1=N\C/C=N\C(O)CC1C	Hydroxylation of heteroalicyclic secondary carbon
	CC[S+](C)CCC/C1=N\C/C=N\CCC1C	Thioether S-methylation

## Sheet: Candidate_e
Candidate Antagonist SMILES	Metabolite SMILES	Mode of Generation
CNCCCSC1(C)CC1CC1CC1C	CNCCCSC1(C)CC1CC1CC1CO	Hydroxylation of methyl carbon adjacent to aliphatic ring
	CNCCCSC1(CO)CC1CC1CC1C	Hydroxylation of methyl carbon adjacent to aliphatic ring
	CNCCCSC1(C)CC1CC1CC1(C)O	Hydroxylation of penultimate aliphatic tertiary carbon
	CNCCCS(=O)C1(C)CC1CC1CC1C	S-Oxidation of dialkylthioether to sulfoxide
	CNCCCSC1(C)C(O)C1CC1CC1C	Hydroxylation of alicyclic secondary carbon
	CNCCCSC1(C)CC1(O)CC1CC1C	Hydroxylation of alicyclic secondary carbon
	CNCCCSC1(C)CC1CC1(O)CC1C	Hydroxylation of alicyclic secondary carbon
	CNCCCSC1(C)CC1CC1C(C)C1O	Hydroxylation of alicyclic secondary carbon
	CNCCCSC1(C)CC1CC1CC1(C)O	Hydroxylation of alicyclic secondary carbon
	CC1CC1CC1CC1(C)SCCCN	N-Dealkylation of acyclic secondary amine
	CN	N-Dealkylation of acyclic secondary amine
	CC1CC1CC1CC1(C)SCCC=O	N-Dealkylation of acyclic secondary amine

## Sheet: Candidate_f
Candidate Antagonist SMILES	Metabolite SMILES	Mode of Generation
CNCCCCCC1CCC2=CC=C1CC2	CNCC(O)CCCC1CCC2=CC=C1CC2	Hydroxylation of acyclic aliphatic secondary carbon
	CNCCC(O)CCC1CCC2=CC=C1CC2	Hydroxylation of acyclic aliphatic secondary carbon
	CNCCCC(O)CC1CCC2=CC=C1CC2	Hydroxylation of acyclic aliphatic secondary carbon
	CNCCCCC(O)C1CCC2=CC=C1CC2	Hydroxylation of acyclic aliphatic secondary carbon
	CNCCCCCC1CC(O)C2=CC=C1CC2	Allylic hydroxylation
	CNCCCCCC1CCC2=CC=C1CC2O	Allylic hydroxylation
	CNCCCCCC1(O)CCC2=CC=C1CC2	Allylic hydroxylation
	CNCCCCCC1CCC2=CC=C1C(O)C2	Allylic hydroxylation
	NCCCCCC1CCC2=CC=C1CC2	N-Dealkylation of acyclic secondary amine
	CN	N-Dealkylation of acyclic secondary amine
	O=CCCCCC1CCC2=CC=C1CC2	N-Dealkylation of acyclic secondary amine
	CNCCCCCC1C2=CC=C(CC2)CC1O	Hydroxylation of alicyclic secondary carbon
	CNCCCCCC1CC(O)C2=CC=C1CC2	Hydroxylation of alicyclic secondary carbon
	CNCCCCCC1CCC2=CC=C1C(O)C2	Hydroxylation of alicyclic secondary carbon
	CNCCCCCC1CCC2=CC=C1CC2O	Hydroxylation of alicyclic secondary carbon

## Sheet: Candidate_g
Candidate Antagonist SMILES	Metabolite SMILES	Mode of Generation
CCCCC=C=C1C2CCC1CN(C2)CC	CCCCC=C=C1C2CCC1C(O)N(CC)C2	Aliphatic hydroxylation of carbon alpha to secondary or tertiary alkyl-N
	CCCCC=C=C1C2CCC1CN(C(C)O)C2	Aliphatic hydroxylation of carbon alpha to secondary or tertiary alkyl-N
	CCCCC=C=C1C2CCC1CNC2	N-Dealkylation of alicyclic tertiary amine
	CC=O	N-Dealkylation of alicyclic tertiary amine
	CCN1CC2CCC(C1)C2=C=CCCC(C)O	Hydroxylation of penultimate aliphatic secondary carbon
	CCCCC=C=C1C2CC(O)C1CN(CC)C2	Hydroxylation of alicyclic secondary carbon
	CCN1CC2CCC(C1)C2=C=CCCCCO	Hydroxylation of terminal methyl
	CCCCC=C=C1C2CCC1CN(CCO)C2	Hydroxylation of terminal methyl
	CCCCC=C=C1C2CCC1C[N+]([O-])(CC)C2	N-Oxidation of alicyclic tertiary amine
	CCCCC=C=C1C2CCC1C[N+]([O-])(CC)C2	N-Oxidation of aliphatic tertiary amine
	CCCCC=C=C1C2CCC1C(O)N(CC)C2	Hydroxylation of heteroalicyclic secondary carbon
	C=CCCC=C=C1C2CCC1CN(CC)C2	Terminal desaturation

## Sheet: Candidate_h
Candidate Antagonist SMILES	Metabolite SMILES	Mode of Generation
CCCCCSCS12CCCC1CNC2CC	CCCCCS(=O)CS12CCCC1CNC2CC	S-Oxidation of dialkylthioether to sulfoxide
	CCC1NCC2CCCS21CSCCCC(C)O	Hydroxylation of penultimate aliphatic secondary carbon
	CCCCCSCS12CCCC1CNC2C(C)O	Hydroxylation of penultimate aliphatic secondary carbon
	CCC1NCC2CCCS21CSCCCCCO	Hydroxylation of terminal methyl
	CCCCCSCS12CCCC1CNC2CCO	Hydroxylation of terminal methyl
	CCCCCSCS12C(O)CCC1CNC2CC	Hydroxylation of heteroalicyclic secondary carbon
	CCCCCSCS12CCCC1C(O)NC2CC	Hydroxylation of heteroalicyclic secondary carbon
	C=CCCCSCS12CCCC1CNC2CC	Terminal desaturation
	C=CC1NCC2CCCS21CSCCCCC	Terminal desaturation
	CCCCC[S+](C)CS12CCCC1CNC2CC	Thioether S-methylation

## Sheet: Candidate_i
Candidate Antagonist SMILES	Metabolite SMILES	Mode of Generation
CCCNCC1C2NCCC2CC1(CC)NCC	CCNC1(CC)CC2CCNC2C1CNCC(C)O	Hydroxylation of penultimate aliphatic secondary carbon
	CCCNCC1C2NCCC2CC1(NCC)C(C)O	Hydroxylation of penultimate aliphatic secondary carbon
	CCCNCC1C2NCCC2C(O)C1(CC)NCC	Hydroxylation of alicyclic secondary carbon
	CCNC1(CC)CC2CCNC2C1CNCCCO	Hydroxylation of terminal methyl
	CCCNCC1C2NCCC2CC1(CC)NCCO	Hydroxylation of terminal methyl
	CCCNCC1C2NCCC2CC1(CCO)NCC	Hydroxylation of terminal methyl
	CCC=O	N-Dealkylation of acyclic secondary amine
	CCNC1(CC)CC2CCNC2C1CN	N-Dealkylation of acyclic secondary amine
	CCCN	N-Dealkylation of acyclic secondary amine
	CCNC1(CC)CC2CCNC2C1C=O	N-Dealkylation of acyclic secondary amine
	CCCNCC1C2NCCC2CC1(N)CC	N-Dealkylation of acyclic secondary amine
	CC=O	N-Dealkylation of acyclic secondary amine
	CCCNCC1C2NC(O)CC2CC1(CC)NCC	Hydroxylation of heteroalicyclic secondary carbon
	C=CCNCC1C2NCCC2CC1(CC)NCC	Terminal desaturation
	C=CC1(NCC)CC2CCNC2C1CNCCC	Terminal desaturation

## Sheet: Candidate_j
Candidate Antagonist SMILES	Metabolite SMILES	Mode of Generation
CCCCC1CCC#S21CCCCN(C2C)CC	CCCCC1CCC#S1(CCCC=O)C(C)NCC	Tertiary amine -> secondary amine + aldehyde or ketone (EAWAG Rule bt0063 Pattern 2)
	CCCCC1CCC#S1(CCCCNCC)C(C)=O	Tertiary amine -> secondary amine + aldehyde or ketone (EAWAG Rule bt0063 Pattern 2)
	CCCCC1CCC#S12CCCCNC2C	Tertiary amine -> secondary amine + aldehyde or ketone (EAWAG Rule bt0063 Pattern 2)
	CC=O	Tertiary amine -> secondary amine + aldehyde or ketone (EAWAG Rule bt0063 Pattern 2)

[truncated: 2 more sheets: Candidate_k, Candidate_l]
