# Supplementary material for: Application and assessment of deep learning for the generation of potential NMDA receptor antagonists
Source: Royal Society of Chemistry journal article supplement (doi:10.1039/d0cp03620j), 2020-12-08
Supplement: d0cp03620j3.xlsx [file d0cp03620j3.xlsx]

## Sheet: PCP Analogs
Name	Common Name	Molecular Formula	Canonical SMILES	References/Citations
4-(Dimethylamino)-4-phenyl-1-(2-phenylethyl)cyclohexan-1-ol	PDPC	C22H29NO	CN(C1(CCC(CC1)(O)CCc1ccccc1)c1ccccc1)C	isomerdesign.com
1-[4-(3-Methoxyphenyl)oxan-4-yl]piperidine	3-MeO-PPyP	C17H25NO2	COc1cccc(c1)C1(CCOCC1)N1CCCCC1	isomerdesign.com
1-(4-Phenyloxan-4-yl)piperidine	PPyP	C16H23NO	C1CCN(CC1)C1(CCOCC1)c1ccccc1	isomerdesign.com
4-[1-(4-Methylphenyl)cyclohexyl]morpholine	4-Me-PCMo	C17H25NO	Cc1ccc(cc1)C1(CCCCC1)N1CCOCC1	isomerdesign.com
N-Ethyl-N-methyl-1-phenylcyclohexan-1-amine	PCEM	C15H23N	CCN(C1(CCCCC1)c1ccccc1)C	isomerdesign.com
5-Methyl-1-[1-(5-methylthiophen-2-yl)cyclohexyl]-1,2,3,6-tetrahydropyridine	US	C17H25NS	CC1=CCCN(C1)C1(CCCCC1)c1ccc(s1)C	isomerdesign.com
1-[1-(4-Methoxyphenyl)cyclohexyl]piperidin-4-ol	4″-HO-4-MeO-PCP	C18H27NO2	COc1ccc(cc1)C1(CCCCC1)N1CCC(CC1)O	isomerdesign.com
1-(3,3,5-Trimethyl-1-phenylcyclohexyl)piperidine	3′,3′,5′-TriMe-PCP	C20H31N	CC1CC(C)(C)CC(C1)(N1CCCCC1)c1ccccc1	isomerdesign.com
4-[1-(3-Methoxyphenyl)cyclohexyl]morpholine	3-MeO-PCMo	C17H25NO2	COc1cccc(c1)C1(CCCCC1)N1CCOCC1	isomerdesign.com
1-(2-Methyl-1-phenylcyclohexyl)piperidine		C18H27N	CC1CCCCC1(N1CCCCC1)c1ccccc1	isomerdesign.com
1-[1-(3-Nitrophenyl)cyclohexyl]piperidine		C17H24N2O2	O=N(=O)c1cccc(c1)C1(CCCCC1)N1CCCCC1	isomerdesign.com
2-(2-Methoxyphenyl)-2-(methylamino)cyclohexan-1-one		C14H19NO2	CNC1(CCCCC1=O)c1ccccc1OC	isomerdesign.com
1-[1-(3-Bromophenyl)cyclohexyl]piperidine		C17H24BrN	Brc1cccc(c1)C1(CCCCC1)N1CCCCC1	isomerdesign.com
2-Amino-2-(2-chlorophenyl)-4-hydroxycyclohexan-1-one		C12H14ClNO2	OC1CCC(=O)C(C1)(N)c1ccccc1Cl	isomerdesign.com
2-Amino-2-(2-chlorophenyl)-5-hydroxycyclohexan-1-one		C12H14ClNO2	OC1CCC(C(=O)C1)(N)c1ccccc1Cl	isomerdesign.com
1-Amino-2′-chloro-5,6-dihydro[1,1′-biphenyl]-2(1H)-one		C12H12ClNO	O=C1C=CCCC1(N)c1ccccc1Cl	isomerdesign.com
3-[1-(Piperidin-1-yl)cyclohexyl]aniline		C17H26N2	Nc1cccc(c1)C1(CCCCC1)N1CCCCC1	isomerdesign.com
1-[1-(4-Chlorophenyl)cyclohexyl]piperidine		C17H24ClN	Clc1ccc(cc1)C1(CCCCC1)N1CCCCC1	isomerdesign.com
1-[1-(3-Methylphenyl)cyclohexyl]piperidine		C18H27N	Cc1cccc(c1)C1(CCCCC1)N1CCCCC1	isomerdesign.com
1-(4,4-Dimethyl-1-phenylcyclohexyl)piperidine	4′,4′-DiMe-PCP	C19H29N	CC1(C)CCC(CC1)(N1CCCCC1)c1ccccc1	isomerdesign.com
N-Propyl-1-(thiophen-2-yl)cyclohexan-1-amine	TCPr	C13H21NS	CCCNC1(CCCCC1)c1cccs1	isomerdesign.com
1-[2-(2-Fluorophenyl)bicyclo[2.2.1]heptan-2-yl]pyrrolidine	2F-PBCHPy	C17H22FN	Fc1ccccc1C1(CC2CC1CC2)N1CCCC1	isomerdesign.com
1-[2-(3-Fluorophenyl)bicyclo[2.2.1]heptan-2-yl]piperidine	3F-PBCHP	C18H24FN	Fc1cccc(c1)C1(CC2CC1CC2)N1CCCCC1	isomerdesign.com
1-[2-(3-Fluorophenyl)bicyclo[2.2.1]heptan-2-yl]pyrrolidine	3F-PBCHPy	C17H22FN	Fc1cccc(c1)C1(CC2CC1CC2)N1CCCC1	isomerdesign.com
1-[2-(4-Fluorophenyl)bicyclo[2.2.1]heptan-2-yl]piperidine	4F-PBCHP	C18H24FN	Fc1ccc(cc1)C1(CC2CC1CC2)N1CCCCC1	isomerdesign.com
1-[2-(4-Fluorophenyl)bicyclo[2.2.1]heptan-2-yl]pyrrolidine	4F-PBCHPy	C17H22FN	Fc1ccc(cc1)C1(CC2CC1CC2)N1CCCC1	isomerdesign.com
1-{2-[4-(Trifluoromethyl)phenyl]bicyclo[2.2.1]heptan-2-yl}piperidine	4-CF3-PBCHP	C19H24F3N	FC(c1ccc(cc1)C1(CC2CC1CC2)N1CCCCC1)(F)F	isomerdesign.com
1-{2-[4-(Trifluoromethyl)phenyl]bicyclo[2.2.1]heptan-2-yl}pyrrolidine	4-CF3-PBCHPy	C18H22F3N	FC(c1ccc(cc1)C1(CC2CC1CC2)N1CCCC1)(F)F	isomerdesign.com
1-(2-Phenyladamantan-2-yl)piperidine	P2AP	C21H29N	C1CCN(CC1)C1(C2CC3CC1CC(C2)C3)c1ccccc1	isomerdesign.com
1-(1-{3-[(Propan-2-yl)oxy]phenyl}cyclohexyl)piperidine	3-IpO-PCP	C20H31NO	CC(Oc1cccc(c1)C1(CCCCC1)N1CCCCC1)C	isomerdesign.com
1-[1-(3-Ethoxyphenyl)cyclohexyl]piperidine	3-EtO-PCP	C19H29NO	CCOc1cccc(c1)C1(CCCCC1)N1CCCCC1	isomerdesign.com
1-[1-(2,3-Dihydro-1,4-benzodioxin-6-yl)cyclohexyl]piperidine	3,4-ED-PCP	C19H27NO2	C1CCC(CC1)(N1CCCCC1)c1ccc2c(c1)OCCO2	isomerdesign.com
1-[1-(2H-1,3-Benzodioxol-5-yl)cyclohexyl]piperidine	3,4-MD-PCP	C18H25NO2	C1CCC(CC1)(N1CCCCC1)c1ccc2c(c1)OCO2	isomerdesign.com
1-(3-Fluorophenyl)cyclohexan-1-amine	3-F-PCA	C12H16FN	Fc1cccc(c1)C1(N)CCCCC1	isomerdesign.com
4-(Dimethylamino)-4-(4-methylphenyl)cyclohexan-1-one	Dimetamine	C15H21NO	CN(C1(CCC(=O)CC1)c1ccc(cc1)C)C	isomerdesign.com
1-(4-Methoxy-3-methylphenyl)cyclohexan-1-amine	3-Me-4-MeO-PCA	C14H21NO	COc1ccc(cc1C)C1(N)CCCCC1	isomerdesign.com
1-(3,5-Dimethoxyphenyl)cyclohexan-1-amine	3,5-DiMeO-PCA	C14H21NO2	COc1cc(cc(c1)OC)C1(N)CCCCC1	isomerdesign.com
1-(1-Phenylcyclopentyl)piperidine	PCPEP	C16H23N	C1CCN(CC1)C1(CCCC1)c1ccccc1	isomerdesign.com
1-(1-Phenylcycloheptyl)piperidine	PCHEP	C18H27N	C1CCCC(CC1)(N1CCCCC1)c1ccccc1	isomerdesign.com
1-[1-(1-Benzothiophen-3-yl)cyclohexyl]-2,2,6,6-tetramethylpiperidin-4-ol		C23H33NOS	OC1CC(C)(C)N(C(C1)(C)C)C1(CCCCC1)c1csc2c1cccc2	isomerdesign.com
1-[1-(2,3-Dihydro-1-benzofuran-5-yl)cyclohexyl]piperidine	4-DHBF-PCP	C19H27NO	C1CCC(CC1)(N1CCCCC1)c1ccc2c(c1)CCO2	isomerdesign.com
2-(3-Methoxyphenyl)-2-(propylamino)cyclohexan-1-one	3-MeO-2′-Oxo-PCPr	C16H23NO2	CCCNC1(CCCCC1=O)c1cccc(c1)OC	isomerdesign.com
1-[1-(4-Methylphenyl)-1,2,3,4-tetrahydronaphthalen-1-yl]piperidine		C22H27N	Cc1ccc(cc1)C1(CCCc2c1cccc2)N1CCCCC1	isomerdesign.com
1-(1-Phenylcyclohexyl)-1H-pyrrole	PCPyrrole	C16H19N	C1CCC(CC1)(c1ccccc1)n1cccc1	isomerdesign.com
1-[1-(4-Methylphenyl)cyclohexyl]-1H-pyrrole		C17H21N	Cc1ccc(cc1)C1(CCCCC1)n1cccc1	isomerdesign.com
2-(3-Methoxyphenyl)-2-(piperidin-1-yl)cyclohexan-1-one	3-MeO-2′-Oxo-PCP	C18H25NO2	COc1cccc(c1)C1(CCCCC1=O)N1CCCCC1	isomerdesign.com
2-(3-Methoxyphenyl)-2-(pyrrolidin-1-yl)cyclohexan-1-one	3-MeO-2′-Oxo-PCPy	C17H23NO2	COc1cccc(c1)C1(CCCCC1=O)N1CCCC1	isomerdesign.com
1-(4-Fluoro-3-methylphenyl)cyclohexan-1-amine	3-Me-4-F-PCA	C13H18FN	Fc1ccc(cc1C)C1(N)CCCCC1	isomerdesign.com
1-(1-Phenylcyclohexyl)azepane	PCAz	C18H27N	C1CCC(CC1)(N1CCCCCC1)c1ccccc1	isomerdesign.com
4-Phenyl-4-(piperidin-1-yl)cyclohexan-1-one	4′-Oxo-PCP	C17H23NO	O=C1CCC(CC1)(N1CCCCC1)c1ccccc1	isomerdesign.com
3,3-Dimethyl-1-(1-phenylcyclohexyl)pyrrolidine	PCDMPy	C18H27N	CC1(C)CCN(C1)C1(CCCCC1)c1ccccc1	isomerdesign.com
3-Methyl-1-(1-phenylcyclohexyl)piperidine	PC3MP	C18H27N	CC1CCCN(C1)C1(CCCCC1)c1ccccc1	isomerdesign.com
1-(4-Methyl-1-phenylcyclohexyl)piperidine		C18H27N	CC1CCC(CC1)(N1CCCCC1)c1ccccc1	isomerdesign.com
1-[1-(4-Fluorophenyl)cyclohexyl]piperidine		C17H24FN	Fc1ccc(cc1)C1(CCCCC1)N1CCCCC1	isomerdesign.com
4-[1-(Piperidin-1-yl)cyclohexyl]phenol		C17H25NO	Oc1ccc(cc1)C1(CCCCC1)N1CCCCC1	isomerdesign.com
1-[1-(4-Nitrophenyl)cyclohexyl]piperidine		C17H24N2O2	O=N(=O)c1ccc(cc1)C1(CCCCC1)N1CCCCC1	isomerdesign.com
2-Phenyl-2-(piperidin-1-yl)cyclohexan-1-one	2′-Oxo-PCP	C17H23NO	O=C1CCCCC1(N1CCCCC1)c1ccccc1	isomerdesign.com
4-(1-Phenylcyclohexyl)morpholine		C16H23NO	C1CCC(CC1)(N1CCOCC1)c1ccccc1	isomerdesign.com
N-Methyl-1-phenyl-N-(prop-2-en-1-yl)cyclohexan-1-amine		C16H23N	C=CCN(C1(CCCCC1)c1ccccc1)C	isomerdesign.com
N-Ethyl-1-phenyl-N-(prop-2-en-1-yl)cyclohexan-1-amine		C17H25N	C=CCN(C1(CCCCC1)c1ccccc1)CC	isomerdesign.com
1-[1-(Naphthalen-1-yl)cyclohexyl]piperidine	1-Naphthyl-CP	C21H27N	C1CCC(CC1)(N1CCCCC1)c1cccc2c1cccc2	isomerdesign.com
3-Methyl-1-[4-(thiophen-2-yl)thian-4-yl]piperidine	US	C15H23NS2	CC1CCCN(C1)C1(CCSCC1)c1cccs1	isomerdesign.com
1-(3-Methyl-1-phenylcyclohexyl)piperidine	3′-Me-PCP	C18H27N	CC1CCCC(C1)(N1CCCCC1)c1ccccc1	isomerdesign.com
1-[1-(3-Methoxy-4-methylphenyl)cyclohexyl]piperidine	3-MeO-4-Me-PCP	C19H29NO	COc1cc(ccc1C)C1(CCCCC1)N1CCCCC1	isomerdesign.com
1-[1-(4-Fluoro-3-methylphenyl)cyclohexyl]piperidine	3-Me-4-F-PCP	C18H26FN	Fc1ccc(cc1C)C1(CCCCC1)N1CCCCC1	isomerdesign.com
1-{1-[3-(Trifluoromethoxy)phenyl]cyclohexyl}piperidine	3-CF3O-PCP	C18H24F3NO	FC(Oc1cccc(c1)C1(CCCCC1)N1CCCCC1)(F)F	isomerdesign.com
1-[1-(3,4-Dimethoxyphenyl)cyclohexyl]piperidine	3,4-DiMeO-PCP	C19H29NO2	COc1cc(ccc1OC)C1(CCCCC1)N1CCCCC1	isomerdesign.com
1-[1-(3,5-Dimethoxyphenyl)cyclohexyl]piperidine	3,5-DiMeO-PCP	C19H29NO2	COc1cc(OC)cc(c1)C1(CCCCC1)N1CCCCC1	isomerdesign.com
1-[1-(2,5-Dimethoxyphenyl)cyclohexyl]piperidine	2,5-DiMeO-PCP	C19H29NO2	COc1ccc(cc1C1(CCCCC1)N1CCCCC1)OC	isomerdesign.com
1-[1-(2-Methoxyphenyl)cyclohexyl]pyrrolidine	2-MeO-PCPy	C17H25NO	COc1ccccc1C1(CCCCC1)N1CCCC1	isomerdesign.com
1-[1-(2H-1,3-Benzodioxol-5-yl)cyclohexyl]pyrrolidine	3,4-MD-PCPy	C17H23NO2	C1CCC(CC1)(N1CCCC1)c1ccc2c(c1)OCO2	isomerdesign.com
1-(3-Methoxyphenyl)-N-methylcyclohexan-1-amine	3-MeO-PCMe	C14H21NO	CNC1(CCCCC1)c1cccc(c1)OC	isomerdesign.com
1-(3-Methylphenyl)-N-propylcyclohexan-1-amine	3-Me-PCPr	C16H25N	CCCNC1(CCCCC1)c1cccc(c1)C	isomerdesign.com
1-[4-Methyl-1-(thiophen-2-yl)cyclohexyl]-1,2,3,6-tetrahydropyridine	US	C16H23NS	CC1CCC(CC1)(N1CCC=CC1)c1cccs1	isomerdesign.com
1-Phenyl-N-(prop-2-en-1-yl)cyclohexan-1-amine		C15H21N	C=CCNC1(CCCCC1)c1ccccc1	isomerdesign.com
4-Fluoro-1-[1-(thiophen-2-yl)cyclohexyl]piperidine	FTCP	C15H22FNS	FC1CCN(CC1)C1(CCCCC1)c1cccs1	isomerdesign.com
1-{1-[5-(2-Fluoroethyl)thiophen-2-yl]cyclohexyl}piperidine	FETCP	C17H26FNS	FCCc1ccc(s1)C1(CCCCC1)N1CCCCC1	isomerdesign.com
N-Methyl-1-phenylcyclohexan-1-amine	PCMe	C13H19N	CNC1(CCCCC1)c1ccccc1	isomerdesign.com
1-(1-Propylcyclohexyl)piperidine	Propyl-CP	C14H27N	CCCC1(CCCCC1)N1CCCCC1	isomerdesign.com
2-(Methylamino)-2-phenylcyclohexan-1-one		C13H17NO	CNC1(CCCCC1=O)c1ccccc1	isomerdesign.com
1-[1-(1-Benzothiophen-2-yl)cyclohexyl]piperidine		C19H25NS	C1CCN(CC1)C1(CCCCC1)c1cc2c(s1)cccc2	isomerdesign.com
1-Phenylcyclohexan-1-amine		C12H17N	NC1(CCCCC1)c1ccccc1	isomerdesign.com
2-(3-Methoxyphenyl)-2-(methylamino)cyclohexan-1-one		C14H19NO2	CNC1(CCCCC1=O)c1cccc(c1)OC	isomerdesign.com
1-(1-Phenylcyclohexyl)piperidin-4-yl	4″-Benzoyloxy-PCP	C24H29NO2	O=C(c1ccccc1)OC1CCN(CC1)C1(CCCCC1)c1ccccc1	isomerdesign.com
1-(1-Phenylcyclooctyl)piperidine	PCOP	C19H29N	C1CCCC(CCC1)(N1CCCCC1)c1ccccc1	isomerdesign.com
2-Amino-2-(2-chlorophenyl)-6-hydroxycyclohexan-1-one	6′-Hydroxynorketamine	C12H14ClNO2	OC1CCCC(C1=O)(N)c1ccccc1Cl	isomerdesign.com
1-[1-(1-Benzothiophen-2-yl)cyclohexyl]pyrrolidine	BTCPy	C18H23NS	C1CCC(CC1)(N1CCCC1)c1cc2c(s1)cccc2	isomerdesign.com
1-[(1R,3s,5S)-3-Phenylbicyclo[3.1.0]hexan-3-yl]piperidine		C17H23N	C1CCN(CC1)[C@@]1(C[C@@H]2[C@H](C1)C2)c1ccccc1	isomerdesign.com
1-(3,4-Dihydro-1,4-methanonaphthalen-1(2H)-yl)piperidine		C16H21N	C1CCN(CC1)C12CCC(C1)c1c2cccc1	isomerdesign.com
2-(Ethylamino)-2-(thiophen-2-yl)cyclohexan-1-one		C12H17NOS	CCNC1(CCCCC1=O)c1cccs1	isomerdesign.com
1-(3,4-Dihydro-1,4-ethanonaphthalen-1(2H)-yl)piperidine		C17H23N	C1CCN(CC1)C12CCC(CC1)c1c2cccc1	isomerdesign.com
8a-Phenyldecahydroquinoline	8A-PDHQ	C15H21N	c1ccc(cc1)C12CCCCC2CCCN1	isomerdesign.com
1-(6,7,8,9-Tetrahydro-5H-5,9-methanobenzo[7]annulen-5-yl)piperidine		C17H23N	C1CCN(CC1)C12CCCC(C1)c1c2cccc1	isomerdesign.com
1-[1-(3-Methylphenyl)cyclohexyl]pyrrolidine	3-Me-PCPy	C17H25N	Cc1cccc(c1)C1(CCCCC1)N1CCCC1	isomerdesign.com
1,2,3,4,9,9a-Hexahydro-4aH-fluoren-4a-amine	(Phenanthrenamine)	C13H17N	NC12CCCCC1Cc1c2cccc1	isomerdesign.com
1-(3-Fluorophenyl)cycloheptan-1-amine	3F-PCHEA	C13H18FN	Fc1cccc(c1)C1(N)CCCCCC1	isomerdesign.com
1-[1-(3-Fluorophenyl)cycloheptyl]piperidine	3F-PCHEP	C18H26FN	Fc1cccc(c1)C1(CCCCCC1)N1CCCCC1	isomerdesign.com
1-[(1S,2R)-2-Methyl-1-(thiophen-2-yl)cyclohexyl]piperidine	Gacylcidine	C16H25NS	C[C@@H]1CCCC[C@@]1(N1CCCCC1)c1cccs1	isomerdesign.com
(2S)-2-[(4S)-2,2-Diphenyl-1,3-dioxolan-4-yl]piperidine		C20H23NO2	C1CC[C@H](NC1)[C@H]1COC(O1)(c1ccccc1)c1ccccc1	isomerdesign.com
(2S)-2-[(2S,4S)-2-Ethyl-2-phenyl-1,3-dioxolan-4-yl]piperidine		C16H23NO2	CC[C@@]1(OC[C@@H](O1)[C@@H]1CCCCN1)c1ccccc1	isomerdesign.com
2-(Thiophen-2-yl)bicyclo[2.2.1]heptan-2-amine	TBCHA	C11H15NS	NC1(CC2CC1CC2)c1cccs1	isomerdesign.com
1-(2H-1,3-Benzodioxol-5-yl)-N-propylcyclohexan-1-amine	3,4-MD-PCPr	C16H23NO2	CCCNC1(CCCCC1)c1ccc2c(c1)OCO2	isomerdesign.com
4-[1-(Piperidin-1-yl)cyclohexyl]pyridine	4PYCP	C16H24N2	C1CCC(CC1)(N1CCCCC1)c1ccncc1	isomerdesign.com
1-[4-(4-Methylthiophen-2-yl)thian-4-yl]piperidine	US	C15H23NS2	Cc1csc(c1)C1(CCSCC1)N1CCCCC1	isomerdesign.com
1-[1-(3-Fluorophenyl)cycloheptyl]pyrrolidine	3F-PCHEPy	C17H24FN	Fc1cccc(c1)C1(CCCCCC1)N1CCCC1	isomerdesign.com
1-(4-Fluorophenyl)cycloheptan-1-amine	4F-PCHEA	C13H18FN	NC1(CCCCCC1)c1ccc(cc1)F	isomerdesign.com
N-Ethyl-N-methyl-1-(3-methylphenyl)cyclohexan-1-amine	3-Me-PCEM	C16H25N	CCN(C1(CCCCC1)c1cccc(c1)C)C	isomerdesign.com
N,N-Diethyl-1-(4-methylphenyl)cyclohexan-1-amine	4-Me-PCDM	C17H27N	CCN(C1(CCCCC1)c1ccc(cc1)C)CC	isomerdesign.com
N1,N1-Diethyl-N2-methyl-N2-(1-phenylcyclohexyl)ethane-1,2-diamine		C19H32N2	CCN(CCN(C1(CCCCC1)c1ccccc1)C)CC	isomerdesign.com
1-[1-(4-Methoxyphenyl)cyclohexyl]pyrrolidine	4-MeO-PCPy	C17H25NO	COc1ccc(cc1)C1(CCCCC1)N1CCCC1	isomerdesign.com
N-Phenyl-N-[1-(1-phenylcyclohexyl)piperidin-4-yl]propanamide	LS-124445	C26H34N2O	CCC(=O)N(c1ccccc1)C1CCN(CC1)C1(CCCCC1)c1ccccc1	isomerdesign.com
(1r,4s)-4-(4-Bromophenyl)-4-(dimethylamino)-1-(2-phenylethyl)cyclohexan-1-ol		C22H28BrNO	Brc1ccc(cc1)[C@@]1(CC[C@@](CC1)(O)CCc1ccccc1)N(C)C	isomerdesign.com
2-(4-Methoxyphenyl)-2-{[(4-methoxyphenyl)methyl]amino}cyclohexan-1-one		C21H25NO3	COc1ccc(cc1)CNC1(CCCCC1=O)c1ccc(cc1)OC	isomerdesign.com
N-Ethyl-1-(4-methoxyphenyl)-N-methylcyclohexan-1-amine	4-MeO-PCEMe	C16H25NO	CCN(C1(CCCCC1)c1ccc(cc1)OC)C	isomerdesign.com
1-(3-Methoxyphenyl)cyclohexan-1-amine	3-MeO-PCA	C13H19NO	COc1cccc(c1)C1(N)CCCCC1	isomerdesign.com
1-[1-(3-Methoxyphenyl)cyclopentyl]piperidine	3-MeO-PCPEP	C17H25NO	COc1cccc(c1)C1(CCCC1)N1CCCCC1	isomerdesign.com
1-[1-(4-Phenoxyphenyl)cyclohexyl]piperidine	4-PhO-PCP	C23H29NO	C1CCN(CC1)C1(CCCCC1)c1ccc(cc1)Oc1ccccc1	isomerdesign.com
3-Ethyl-3-methyl-1-(1-phenylcyclohexyl)pyrrolidine	PCEMPy	C19H29N	CCC1(C)CCN(C1)C1(CCCCC1)c1ccccc1	isomerdesign.com
2-(2-Chlorophenyl)-2-(piperidin-1-yl)cyclohexan-1-one	2-Cl-2′-Oxo-PCP	C17H22ClNO	O=C1CCCCC1(N1CCCCC1)c1ccccc1Cl	isomerdesign.com
1-(1-Phenylcyclohexyl)pyrrolidine		C16H23N	C1CCC(CC1)(N1CCCC1)c1ccccc1	isomerdesign.com
1-(2-Phenylbicyclo[2.2.1]heptan-2-yl)pyrrolidine	PBCHPy	C17H23N	c1ccc(cc1)C1(CC2CC1CC2)N1CCCC1	isomerdesign.com
1-[1-(3-Methoxyphenyl)cyclohexyl]piperidine		C18H27NO	COc1cccc(c1)C1(CCCCC1)N1CCCCC1	isomerdesign.com
3-Methyl-4-[1-(piperidin-1-yl)cyclohexyl]phenol	4-HO-2-Me-PCP	C18H27NO	Oc1ccc(c(c1)C)C1(CCCCC1)N1CCCCC1	isomerdesign.com
2-Phenyl-2-(piperidin-1-yl)cyclohexan-1-ol	2′-HO-PCP	C17H25NO	OC1CCCCC1(N1CCCCC1)c1ccccc1	isomerdesign.com
1-(2,3-Dihydro-1-benzofuran-5-yl)cyclohexan-1-amine	4-DHBF-PCA	C14H19NO	NC1(CCCCC1)c1ccc2c(c1)CCO2	isomerdesign.com
1-(2,3-Dihydro-1,4-benzodioxin-6-yl)cyclohexan-1-amine	3,4-ED-PCA	C14H19NO2	NC1(CCCCC1)c1ccc2c(c1)OCCO2	isomerdesign.com
1-(3-Ethoxyphenyl)cyclohexan-1-amine	3-EtO-PCA	C14H21NO	CCOc1cccc(c1)C1(N)CCCCC1	isomerdesign.com
1-(2-Methoxyphenyl)cyclohexan-1-amine	2-MeO-PCA	C13H19NO	COc1ccccc1C1(N)CCCCC1	isomerdesign.com
1-(2H-1,3-Benzodioxol-5-yl)cyclohexan-1-amine	3,4-MD-PCA	C13H17NO2	NC1(CCCCC1)c1ccc2c(c1)OCO2	isomerdesign.com
1-[(1R,2R,5S)-2-Phenylbicyclo[3.1.0]hexan-2-yl]piperidine		C17H23N	C1CCN(CC1)[C@@]1(CC[C@@H]2[C@H]1C2)c1ccccc1	isomerdesign.com
1-[(1R,2S,5S)-2-Phenylbicyclo[3.1.0]hexan-2-yl]piperidine		C17H23N	C1CCN(CC1)[C@]1(CC[C@@H]2[C@H]1C2)c1ccccc1	isomerdesign.com
1-[(1R,3r,5S)-3-Phenylbicyclo[3.1.0]hexan-3-yl]piperidine		C17H23N	C1CCN(CC1)[C@@]1(C[C@H]2[C@@H](C1)C2)c1ccccc1	isomerdesign.com
1-[(1S,2R,5R)-2-Phenylbicyclo[3.1.0]hexan-2-yl]piperidine		C17H23N	C1CCN(CC1)[C@@]1(CC[C@H]2[C@@H]1C2)c1ccccc1	isomerdesign.com
1-[1-(4-Methoxyphenyl)cyclohexyl]piperidine		C18H27NO	COc1ccc(cc1)C1(CCCCC1)N1CCCCC1	isomerdesign.com
2-(2-Chlorophenyl)-6-hydroxy-2-(methylamino)cyclohexan-1-one		C13H16ClNO2	CNC1(CCCC(C1=O)O)c1ccccc1Cl	isomerdesign.com
2-(3-Methoxyphenyl)bicyclo[2.2.1]heptan-2-amine	3-MeO-PBCHA	C14H19NO	COc1cccc(c1)C1(N)CC2CC1CC2	isomerdesign.com
2-(4-Methoxyphenyl)bicyclo[2.2.1]heptan-2-amine	4-MeO-PBCHA	C14H19NO	COc1ccc(cc1)C1(N)CC2CC1CC2	isomerdesign.com
1-[2-(4-Methoxyphenyl)bicyclo[2.2.1]heptan-2-yl]piperidine	4-MeO-PBCHP	C19H27NO	COc1ccc(cc1)C1(CC2CC1CC2)N1CCCCC1	isomerdesign.com
N-Ethyl-1-(3-methoxyphenyl)cyclohexan-1-amine		C15H23NO	CCNC1(CCCCC1)c1cccc(c1)OC	isomerdesign.com
1-[1-(3-Methoxyphenyl)cyclohexyl]pyrrolidine	3-MeO-PCPy	C17H25NO	COc1cccc(c1)C1(CCCCC1)N1CCCC1	isomerdesign.com
1-[2-(3-Methoxyphenyl)bicyclo[2.2.1]heptan-2-yl]piperidine	3-MeO-PBCHP	C19H27NO	COc1cccc(c1)C1(CC2CC1CC2)N1CCCCC1	isomerdesign.com
2-(2-Bromo-5-methoxyphenyl)-2-(ethylamino)cyclohexan-1-one	Bromo-methoxetamine	C15H20BrNO2	CCNC1(CCCCC1=O)c1cc(OC)ccc1Br	isomerdesign.com
3-[1-(Piperidin-1-yl)cyclohexyl]phenol		C17H25NO	Oc1cccc(c1)C1(CCCCC1)N1CCCCC1	isomerdesign.com
3-[1-(Ethylamino)cyclohexyl]phenol		C14H21NO	CCNC1(CCCCC1)c1cccc(c1)O	isomerdesign.com
1′-Methyl-4′-phenyl-1,4′-bipiperidine	P4MPP	C17H26N2	CN1CCC(CC1)(N1CCCCC1)c1ccccc1	isomerdesign.com
1-[1-(4-Methylthiophen-2-yl)cyclohexyl]-1,2,3,6-tetrahydropyridine	US	C16H23NS	Cc1csc(c1)C1(CCCCC1)N1CCC=CC1	isomerdesign.com
1-(4-Chlorophenyl)-N-ethylcyclohexan-1-amine	4-Cl-PCE	C14H20ClN	CCNC1(CCCCC1)c1ccc(cc1)Cl	isomerdesign.com
1-(3-Chlorophenyl)-N-ethylcyclohexan-1-amine	3-Cl-PCE	C14H20ClN	CCNC1(CCCCC1)c1cccc(c1)Cl	isomerdesign.com
N,N-Diethyl-4-[1-(ethylamino)cyclohexyl]aniline	4-DEA-PCE	C18H30N2	CCNC1(CCCCC1)c1ccc(cc1)N(CC)CC	isomerdesign.com
N-Ethyl-1-(4-methoxyphenyl)cyclohexan-1-amine	4-MeO-PCE	C15H23NO	CCNC1(CCCCC1)c1ccc(cc1)OC	isomerdesign.com
1-(3-Methylphenyl)cyclohexan-1-amine	3-Me-PCA	C13H19N	Cc1cccc(c1)C1(N)CCCCC1	isomerdesign.com
1-(3,4-Dimethoxyphenyl)-N-ethylcyclohexan-1-amine	3,4-MeO-PCE	C16H25NO2	CCNC1(CCCCC1)c1ccc(c(c1)OC)OC	isomerdesign.com
1-[1-(3-Chlorophenyl)cyclohexyl]piperidine	3-Cl-PCP	C17H24ClN	Clc1cccc(c1)C1(CCCCC1)N1CCCCC1	isomerdesign.com
1-[1-(4-Bromophenyl)cyclohexyl]piperidine	4-Br-PCP	C17H24BrN	Brc1ccc(cc1)C1(CCCCC1)N1CCCCC1	isomerdesign.com
1-[1-(2-Methylphenyl)cyclohexyl]piperidine	2-Me-PCP	C18H27N	Cc1ccccc1C1(CCCCC1)N1CCCCC1	isomerdesign.com
N-(2-Ethoxyethyl)-1-phenylcyclohexan-1-amine	PCEEA	C16H25NO	CCOCCNC1(CCCCC1)c1ccccc1	isomerdesign.com
3-Methyl-4-[1-(morpholin-4-yl)cyclohexyl]phenol	4-HO-2-Me-PCMo	C17H25NO2	Oc1ccc(c(c1)C)C1(CCCCC1)N1CCOCC1	isomerdesign.com
3-Phenyl-3-(piperidin-1-yl)-1-azabicyclo[2.2.2]octane	P3QP	C18H26N2	C1CCN(CC1)C1(CN2CCC1CC2)c1ccccc1	isomerdesign.com
1-(2-Methoxy-1-phenylcyclohexyl)piperidine	2′-MeO-PCP	C18H27NO	COC1CCCCC1(N1CCCCC1)c1ccccc1	isomerdesign.com
2-Phenyl-2-(propylamino)cyclohexan-1-one	2-Oxo-PCPr	C15H21NO	CCCNC1(CCCCC1=O)c1ccccc1	isomerdesign.com
2-(Ethylamino)-2-(3-methoxyphenyl)cyclohexan-1-one		C15H21NO2	CCNC1(CCCCC1=O)c1cccc(c1)OC	isomerdesign.com
2-(2-Chlorophenyl)-2-(pyrrolidin-1-yl)cyclohexan-1-one	2-Cl-2′-Oxo-PCPy	C16H20ClNO	O=C1CCCCC1(N1CCCC1)c1ccccc1Cl	isomerdesign.com
2-[1-(Piperidin-1-yl)cyclohexyl]pyridine	2PYCP	C16H24N2	C1CCC(CC1)(N1CCCCC1)c1ccccn1	isomerdesign.com
3-[1-(Piperidin-1-yl)cyclohexyl]pyridine	3PYCP	C16H24N2	C1CCC(CC1)(N1CCCCC1)c1cccnc1	isomerdesign.com
1-[1-(2-Methylphenyl)cyclohexyl]piperidin-3-ol	3″-HO-2-Me-PCP	C18H27NO	OC1CCCN(C1)C1(CCCCC1)c1ccccc1C	isomerdesign.com
1-[1-(3-Fluorophenyl)cyclohexyl]piperidine		C17H24FN	Fc1cccc(c1)C1(CCCCC1)N1CCCCC1	isomerdesign.com
Methyl	SN	C18H24ClNO3	COC(=O)CCCCNC1(CCCCC1=O)c1ccccc1Cl	isomerdesign.com
(3S,4R)-3-[(Dimethylamino)methyl]-4-methyl-1-(1-phenylcyclohexyl)piperidin-4-ol	US	C21H34N2O	CN(C[C@H]1CN(CC[C@@]1(C)O)C1(CCCCC1)c1ccccc1)C	isomerdesign.com
3-Methyl-1-[1-(thiophen-2-yl)cyclohexyl]piperidine	US	C16H25NS	CC1CCCN(C1)C1(CCCCC1)c1cccs1	isomerdesign.com
1-Phenyl-N-propylcyclohexan-1-amine		C15H23N	CCCNC1(CCCCC1)c1ccccc1	isomerdesign.com
4-[1-(4-Methoxyphenyl)cyclohexyl]morpholine	4-MeO-PCMo	C17H25NO2	COc1ccc(cc1)C1(CCCCC1)N1CCOCC1	isomerdesign.com
4-[1-(2-Methoxyphenyl)cyclohexyl]morpholine	2-MeO-PCMo	C17H25NO2	COc1ccccc1C1(CCCCC1)N1CCOCC1	isomerdesign.com
4-[1-(2H-1,3-Benzodioxol-5-yl)cyclohexyl]morpholine	3,4-MD-PCMo	C17H23NO3	C1CCC(CC1)(N1CCOCC1)c1ccc2c(c1)OCO2	isomerdesign.com
N-Methyl-1-(3-methylphenyl)cyclohexan-1-amine	3-Me-PCMe	C14H21N	CNC1(CCCCC1)c1cccc(c1)C	isomerdesign.com
4-[1-(3-Methylphenyl)cyclohexyl]morpholine	3-Me-PCMo	C17H25NO	Cc1cccc(c1)C1(CCCCC1)N1CCOCC1	isomerdesign.com
1-(4-tert-Butyl-1-phenylcyclohexyl)piperidine	4′-tert-Butyl-PCP	C21H33N	CC(C1CCC(CC1)(N1CCCCC1)c1ccccc1)(C)C	isomerdesign.com
N-(3-Ethoxypropyl)-1-phenylcyclohexan-1-amine	PCEPA	C17H27NO	CCOCCCNC1(CCCCC1)c1ccccc1	isomerdesign.com
1-[1-(Thiophen-2-yl)cyclohexyl]-1,2,3,6-tetrahydropyridine	US	C15H21NS	C1CCC(CC1)(N1CCC=CC1)c1cccs1	isomerdesign.com
(3S,4R)-3-[(Dimethylamino)methyl]-4-(3-methoxyphenyl)-1-(1-phenylcyclohexyl)piperidin-4-ol	US	C27H38N2O2	COc1cccc(c1)[C@@]1(O)CCN(C[C@@H]1CN(C)C)C1(CCCCC1)c1ccccc1	isomerdesign.com
1-Phenylcycloheptan-1-amine	PCHEA	C13H19N	NC1(CCCCCC1)c1ccccc1	isomerdesign.com
1-[2-(Thiophen-2-yl)bicyclo[2.2.1]heptan-2-yl]pyrrolidine	TBCHPy	C15H21NS	C1CCN(C1)C1(CC2CC1CC2)c1cccs1	isomerdesign.com
2-(3-Methylphenyl)-N-propylbicyclo[2.2.1]heptan-2-amine	3-Me-PBCHPr	C17H25N	CCCNC1(CC2CC1CC2)c1cccc(c1)C	isomerdesign.com
N-Ethyl-2-(3-methylphenyl)bicyclo[2.2.1]heptan-2-amine	3-Me-PBCHE	C16H23N	CCNC1(CC2CC1CC2)c1cccc(c1)C	isomerdesign.com
2-(3-Methoxyphenyl)-N-propylbicyclo[2.2.1]heptan-2-amine	3-MeO-PBCHPr	C17H25NO	CCCNC1(CC2CC1CC2)c1cccc(c1)OC	isomerdesign.com
N-Ethyl-2-(3-methoxyphenyl)bicyclo[2.2.1]heptan-2-amine	3-MeO-PBCHE	C16H23NO	CCNC1(CC2CC1CC2)c1cccc(c1)OC	isomerdesign.com
2-Phenyl-N-propylbicyclo[2.2.1]heptan-2-amine	PBCHPr	C16H23N	CCCNC1(CC2CC1CC2)c1ccccc1	isomerdesign.com
N-Ethyl-2-phenylbicyclo[2.2.1]heptan-2-amine	PBCHE	C15H21N	CCNC1(CC2CC1CC2)c1ccccc1	isomerdesign.com
1-[2-(2H-1,3-Benzodioxol-5-yl)bicyclo[2.2.1]heptan-2-yl]pyrrolidine	3,4-MD-PBCHPy	C18H23NO2	C1CCN(C1)C1(CC2CC1CC2)c1ccc2c(c1)OCO2	isomerdesign.com
N,N-Diethyl-1-phenylcyclohexan-1-amine		C16H25N	CCN(C1(CCCCC1)c1ccccc1)CC	isomerdesign.com
1-[2-(4-Methoxyphenyl)bicyclo[2.2.1]heptan-2-yl]pyrrolidine	4-MeO-PBCHPy	C18H25NO	COc1ccc(cc1)C1(CC2CC1CC2)N1CCCC1	isomerdesign.com
4-Phenyl-4-(piperidin-1-yl)cyclohexan-1-ol		C17H25NO	OC1CCC(CC1)(N1CCCCC1)c1ccccc1	isomerdesign.com
2-(Ethylamino)-2-(3-fluorophenyl)cyclohexan-1-one	FXE	C14H18FNO	CCNC1(CCCCC1=O)c1cccc(c1)F	isomerdesign.com
1-(1,3,4,8b-Tetrahydrobiphenylen-4a(2H)-yl)piperidine		C17H23N	C1CCN(CC1)C12CCCCC1c1c2cccc1	isomerdesign.com
1-[2-(3-Methylphenyl)bicyclo[2.2.1]heptan-2-yl]pyrrolidine	3-Me-PBCHPy	C18H25N	Cc1cccc(c1)C1(CC2CC1CC2)N1CCCC1	isomerdesign.com
1-[1-(4-Methylphenyl)cyclohexyl]piperidin-4-ol	4″-HO-4-Me-PCP	C18H27NO	OC1CCN(CC1)C1(CCCCC1)c1ccc(cc1)C	isomerdesign.com
2-(2-Chlorophenyl)-2-(propylamino)cyclohexan-1-one	N-Propylnorketamine	C15H20ClNO	CCCNC1(CCCCC1=O)c1ccccc1Cl	isomerdesign.com
4-Phenyl-1-(1-phenylcyclohexyl)piperidin-4-ol	4″-HO-4″-Ph-PCP	C23H29NO	OC1(CCN(CC1)C1(CCCCC1)c1ccccc1)c1ccccc1	isomerdesign.com
1-(2-Phenylcyclohexyl)pyrrolidine	iso-PCPy	C16H23N	C1CCC(C(C1)c1ccccc1)N1CCCC1	isomerdesign.com
2-(Ethylamino)-2-phenylcyclohexan-1-one		C14H19NO	CCNC1(CCCCC1=O)c1ccccc1	isomerdesign.com
1-{3-[(Propan-2-yl)oxy]phenyl}cyclohexan-1-amine	3-IpO-PCA	C15H23NO	CC(Oc1cccc(c1)C1(N)CCCCC1)C	isomerdesign.com
1-[2-(4-Fluorophenyl)bicyclo[2.2.2]octan-2-yl]piperidine	US	C19H26FN	Fc1ccc(cc1)C1(CC2CCC1CC2)N1CCCCC1	isomerdesign.com
2-(Morpholin-4-yl)ethyl	PRE-084	C19H27NO3	O=C(C1(CCCCC1)c1ccccc1)OCCN1CCOCC1	isomerdesign.com
1-[1-(4-Hydroxy-2-methylphenyl)cyclohexyl]piperidin-4-ol	4,4″-HO-2-Me-PCP	C18H27NO2	OC1CCN(CC1)C1(CCCCC1)c1ccc(cc1C)O	isomerdesign.com
1-[1-(Thiophen-2-yl)cyclohexyl]piperidine		C15H23NS	C1CCN(CC1)C1(CCCCC1)c1cccs1	isomerdesign.com
N-Ethyl-1-phenylcyclohexan-1-amine		C14H21N	CCNC1(CCCCC1)c1ccccc1	isomerdesign.com
(5S,10R)-5-Methyl-10,11-dihydro-5H-5,10-epiminodibenzo[a,d][7]annulene		C16H15N	C[C@]12N[C@@H](c3c2cccc3)Cc2c1cccc2	isomerdesign.com
1-[1-(2-Chlorophenyl)cyclohexyl]piperidine		C17H24ClN	Clc1ccccc1C1(CCCCC1)N1CCCCC1	isomerdesign.com
1-[2-Hydroxy-1-(4-methylphenyl)cyclohexyl]piperidin-4-ol	2′,4″-HO-4-Me-PCP	C18H27NO2	OC1CCN(CC1)C1(CCCCC1O)c1ccc(cc1)C	isomerdesign.com
2-(2-Chlorophenyl)-2-(methylamino)cyclohexan-1-one		C13H16ClNO	CNC1(CCCCC1=O)c1ccccc1Cl	isomerdesign.com
1-(1-Phenylcyclohexyl)piperidine		C17H25N	C1CCC(CC1)(N1CCCCC1)c1ccccc1	isomerdesign.com
N-Butyl-1-phenylcyclohexan-1-amine		C16H25N	CCCCNC1(CCCCC1)c1ccccc1	isomerdesign.com
2-(2,6-Dichlorophenyl)-2-(methylamino)cyclohexan-1-one	2,6-DCK	C13H15Cl2NO	CNC1(CCCCC1=O)c1c(Cl)cccc1Cl	isomerdesign.com
N-(Butan-2-yl)-1-phenylcyclohexan-1-amine	PCsB	C16H25N	CCC(NC1(CCCCC1)c1ccccc1)C	isomerdesign.com
4′-Phenyl-1′-(2-phenylethyl)-1,4′-bipiperidine	PPEPP	C24H32N2	c1ccc(cc1)CCN1CCC(CC1)(N1CCCCC1)c1ccccc1	isomerdesign.com
1-[(1-Phenylcyclohexyl)amino]propan-2-ol		C15H23NO	CC(CNC1(CCCCC1)c1ccccc1)O	isomerdesign.com
2-Amino-2-(2-chlorophenyl)cyclohexan-1-one		C12H14ClNO	O=C1CCCCC1(N)c1ccccc1Cl	isomerdesign.com
N-Methyl-1-(thiophen-2-yl)cyclohexan-1-amine	TCM	C11H17NS	CNC1(CCCCC1)c1cccs1	isomerdesign.com
N-{3-[(Oxan-2-yl)oxy]propyl}-1-phenylcyclohexan-1-amine		C20H31NO2	C1CCC(CC1)(NCCCOC1CCCCO1)c1ccccc1	isomerdesign.com
1-[1-(4-Methoxyphenyl)-1,2,3,4-tetrahydronaphthalen-1-yl]piperidine		C22H27NO	COc1ccc(cc1)C1(CCCc2c1cccc2)N1CCCCC1	isomerdesign.com
N-(5-Methoxypentyl)-1-phenylcyclohexan-1-amine		C18H29NO	COCCCCCNC1(CCCCC1)c1ccccc1	isomerdesign.com
2-(Methylamino)-2-(2-methylphenyl)cyclohexan-1-one	MDCK	C14H19NO	CNC1(CCCCC1=O)c1ccccc1C	isomerdesign.com
2-(4-Methoxyphenyl)-2-{[(4-methylphenyl)methyl]amino}cyclohexan-1-one		C21H25NO2	COc1ccc(cc1)C1(CCCCC1=O)NCc1ccc(cc1)C	isomerdesign.com
N-{2-[(Oxan-2-yl)oxy]ethyl}-1-phenylcyclohexan-1-amine		C19H29NO2	C1CCC(CC1)(NCCOC1CCCCO1)c1ccccc1	isomerdesign.com
N-[2-(Morpholin-4-yl)ethyl]-1-phenylcyclohexan-1-amine		C18H28N2O	C1CCC(CC1)(NCCN1CCOCC1)c1ccccc1	isomerdesign.com
N1,N1-Diethyl-N2-(1-phenylcyclohexyl)ethane-1,2-diamine		C18H30N2	CCN(CCNC1(CCCCC1)c1ccccc1)CC	isomerdesign.com
N1,N1-Dimethyl-N3-(1-phenylcyclohexyl)propane-1,3-diamine		C17H28N2	CN(CCCNC1(CCCCC1)c1ccccc1)C	isomerdesign.com
N-Benzyl-1-phenylcyclohexan-1-amine	PCBzl	C19H23N	c1ccc(cc1)CNC1(CCCCC1)c1ccccc1	isomerdesign.com
N-Pentyl-1-phenylcyclohexan-1-amine	PCPe	C17H27N	CCCCCNC1(CCCCC1)c1ccccc1	isomerdesign.com
1-(4-Chlorophenyl)-N,N-diethylcyclohexan-1-amine	4-Cl-PCDM	C16H24ClN	CCN(C1(CCCCC1)c1ccc(cc1)Cl)CC	isomerdesign.com
1-(4-Methoxyphenyl)cyclohexan-1-amine	4-MeO-PCA	C13H19NO	COc1ccc(cc1)C1(N)CCCCC1	isomerdesign.com
2-(3-Methylphenyl)bicyclo[2.2.1]heptan-2-amine	3-Me-PBCHA	C14H19N	Cc1cccc(c1)C1(N)CC2CC1CC2	isomerdesign.com
1-[1-(3-Methylphenyl)-1,2,3,4-tetrahydronaphthalen-1-yl]piperidine		C22H27N	Cc1cccc(c1)C1(CCCc2c1cccc2)N1CCCCC1	isomerdesign.com
1-(Piperidin-1-yl)-1,2,3,4-tetrahydronaphthalene-1-carbonitrile	Benzo-PCC	C16H20N2	N#CC1(CCCc2c1cccc2)N1CCCCC1	isomerdesign.com
1-(1-Phenylcycloheptyl)pyrrolidine	PCHEPy	C17H25N	C1CCCC(CC1)(N1CCCC1)c1ccccc1	isomerdesign.com
2-(2H-1,3-Benzodioxol-5-yl)bicyclo[2.2.1]heptan-2-amine	3,4-MD-PBCHA	C14H17NO2	NC1(CC2CC1CC2)c1ccc2c(c1)OCO2	isomerdesign.com
2-(2-Fluorophenyl)-2-(methylamino)cyclohexan-1-one		C13H16FNO	CNC1(CCCCC1=O)c1ccccc1F	isomerdesign.com
1-[1-(4-Methylphenyl)cyclohexyl]piperidine		C18H27N	Cc1ccc(cc1)C1(CCCCC1)N1CCCCC1	isomerdesign.com
2-(2-Bromophenyl)-2-(methylamino)cyclohexan-1-one	2Br-Ketamine	C13H16BrNO	CNC1(CCCCC1=O)c1ccccc1Br	isomerdesign.com
1-Phenyl-N,N-di(prop-2-en-1-yl)cyclohexan-1-amine	N,N-Diallyl-PCA	C18H25N	C=CCN(C1(CCCCC1)c1ccccc1)CC=C	isomerdesign.com
1-Methyl-4-(1-phenylcyclohexyl)piperazine	LS-112935	C17H26N2	CN1CCN(CC1)C1(CCCCC1)c1ccccc1	isomerdesign.com
2-(Methylamino)-2-[2-(trifluoromethyl)phenyl]cyclohexan-1-one		C14H16F3NO	CNC1(CCCCC1=O)c1ccccc1C(F)(F)F	isomerdesign.com
N-(3-Methoxypropyl)-1-phenylcyclohexan-1-amine	PCMPA	C16H25NO	COCCCNC1(CCCCC1)c1ccccc1	isomerdesign.com
1-[1-(3-Methoxyphenyl)-1,2,3,4-tetrahydronaphthalen-1-yl]piperidine		C22H27NO	COc1cccc(c1)C1(CCCc2c1cccc2)N1CCCCC1	isomerdesign.com
1-(2H-1,3-Benzodioxol-5-yl)-N-ethylcyclohexan-1-amine	3,4-MD-PCE	C15H21NO2	CCNC1(CCCCC1)c1ccc2c(c1)OCO2	isomerdesign.com
2-[(1-Phenylcyclohexyl)amino]ethan-1-ol	PCHOEA	C14H21NO	OCCNC1(CCCCC1)c1ccccc1	isomerdesign.com
1-(3-Methoxyphenyl)-N-propylcyclohexan-1-amine	3-MeO-PCPr	C16H25NO	CCCNC1(CCCCC1)c1cccc(c1)OC	isomerdesign.com
2-(2-Chlorophenyl)-2-(ethylamino)cyclohexan-1-one		C14H18ClNO	CCNC1(CCCCC1=O)c1ccccc1Cl	isomerdesign.com
1-[1-(Furan-2-yl)cyclohexyl]piperidine	US	C15H23NO	C1CCN(CC1)C1(CCCCC1)c1ccco1	isomerdesign.com
N-(2-Methoxyethyl)-1-phenylcyclohexan-1-amine	PCMEA	C15H23NO	COCCNC1(CCCCC1)c1ccccc1	isomerdesign.com
1-[2-(3-Methylphenyl)bicyclo[2.2.1]heptan-2-yl]piperidine	3-Me-PBCHP	C19H27N	Cc1cccc(c1)C1(CC2CC1CC2)N1CCCCC1	isomerdesign.com
1-(1-Phenylcyclohexyl)azetidine	PCAZ	C15H21N	C1CCC(CC1)(N1CCC1)c1ccccc1	isomerdesign.com
2-[1-(Piperidin-1-yl)cyclohexyl]phenol	2-HO-PCP	C17H25NO	Oc1ccccc1C1(CCCCC1)N1CCCCC1	isomerdesign.com
1-(1-Phenylcyclohexyl)piperidin-4-one	PCP-4″-one	C17H23NO	O=C1CCN(CC1)C1(CCCCC1)c1ccccc1	isomerdesign.com
3-[1-(Piperidin-1-yl)cyclohexyl]phenyl	3-AcO-PCP	C19H27NO2	CC(=O)Oc1cccc(c1)C1(CCCCC1)N1CCCCC1	isomerdesign.com
(3S,4R)-3-[(Dimethylamino)methyl]-4-(3-hydroxyphenyl)-1-(1-phenylcyclohexyl)piperidin-4-ol	US	C26H36N2O2	CN(C[C@H]1CN(CC[C@]1(O)c1cccc(c1)O)C1(CCCCC1)c1ccccc1)C	isomerdesign.com
1-[2-(Thiophen-2-yl)bicyclo[2.2.1]heptan-2-yl]piperidine	TBCHP	C16H23NS	C1CCN(CC1)C1(CC2CC1CC2)c1cccs1	isomerdesign.com
1-[1-(Thiophen-2-yl)cyclohexyl]pyrrolidine	TCPy	C14H21NS	C1CCC(CC1)(N1CCCC1)c1cccs1	isomerdesign.com
1-(4-Phenylthian-4-yl)piperidine	P4TCP	C16H23NS	C1CCN(CC1)C1(CCSCC1)c1ccccc1	isomerdesign.com
4-Methyl-1-(1-phenylcyclohexyl)piperidine		C18H27N	CC1CCN(CC1)C1(CCCCC1)c1ccccc1	isomerdesign.com
N,N-Dimethyl-1-phenylcyclohexan-1-amine	PCDMe	C14H21N	CN(C1(CCCCC1)c1ccccc1)C	isomerdesign.com
1-[1-(2-Methoxyphenyl)cyclohexyl]piperidine		C18H27NO	COc1ccccc1C1(CCCCC1)N1CCCCC1	isomerdesign.com
4-(Dimethylamino)-4-(4-methylphenyl)-1-(2-phenylethyl)cyclohexan-1-ol	MDPC	C23H31NO	Cc1ccc(cc1)C1(CCC(CC1)(O)CCc1ccccc1)N(C)C	isomerdesign.com
1-Phenyl-N-(propan-2-yl)cyclohexan-1-amine		C15H23N	CC(NC1(CCCCC1)c1ccccc1)C	isomerdesign.com
N-Ethyl-1-(4-methylphenyl)cyclohexan-1-amine	4-Me-PCE	C15H23N	CCNC1(CCCCC1)c1ccc(cc1)C	isomerdesign.com
N-Benzyl-1-(3-methylphenyl)cyclohexan-1-amine	3-Me-PCBzl	C20H25N	Cc1cccc(c1)C1(CCCCC1)NCc1ccccc1	isomerdesign.com
1-[1-(4-Methoxy-3-methylphenyl)cyclohexyl]piperidine	3-Me-4-MeO-PCP	C19H29NO	COc1ccc(cc1C)C1(CCCCC1)N1CCCCC1	isomerdesign.com
1-Phenyl-N-{3-[(propan-2-yl)oxy]propyl}cyclohexan-1-amine		C18H29NO	CC(OCCCNC1(CCCCC1)c1ccccc1)C	isomerdesign.com
N-[3-(Methylsulfanyl)propyl]-1-phenylcyclohexan-1-amine		C16H25NS	CSCCCNC1(CCCCC1)c1ccccc1	isomerdesign.com
1-(4-Methoxyphenyl)-N-[(oxolan-2-yl)methyl]cyclohexan-1-amine		C18H27NO2	COc1ccc(cc1)C1(CCCCC1)NCC1CCCO1	isomerdesign.com
N-(2,2-Diethoxyethyl)-1-phenylcyclohexan-1-amine		C18H29NO2	CCOC(CNC1(CCCCC1)c1ccccc1)OCC	isomerdesign.com
N-Methyl-1-(2-methylphenyl)cyclohexan-1-amine	2-MePCMe	C14H21N	CNC1(CCCCC1)c1ccccc1C	isomerdesign.com
1-[2-(2H-1,3-Benzodioxol-5-yl)bicyclo[2.2.1]heptan-2-yl]piperidine	3,4-MD-PBCHP	C19H25NO2	C1CCN(CC1)C1(CC2CC1CC2)c1ccc2c(c1)OCO2	isomerdesign.com
N-Ethyl-1-(2-methylphenyl)cyclohexan-1-amine	2-Me-PCE	C15H23N	CCNC1(CCCCC1)c1ccccc1C	isomerdesign.com
N-Ethyl-1-(3-methylphenyl)cyclohexan-1-amine	3-Me-PCE	C15H23N	CCNC1(CCCCC1)c1cccc(c1)C	isomerdesign.com
1-[2-(3-Methoxyphenyl)bicyclo[2.2.1]heptan-2-yl]pyrrolidine	3-MeO-PBCHPy	C18H25NO	COc1cccc(c1)C1(CC2CC1CC2)N1CCCC1	isomerdesign.com
1-(1-Phenylcyclobutyl)piperidine	PCBP	C15H21N	C1CCN(CC1)C1(CCC1)c1ccccc1	isomerdesign.com
4,4-Dimethyl-1-(1-phenylcyclohexyl)piperidine	PC44DMP	C19H29N	CC1(C)CCN(CC1)C1(CCCCC1)c1ccccc1	isomerdesign.com
1-(1-Phenylcyclohexyl)piperidin-4-ol		C17H25NO	OC1CCN(CC1)C1(CCCCC1)c1ccccc1	isomerdesign.com
1-Methyl-1-(1-phenylcyclohexyl)piperidin-1-ium	PC1MP+	C18H28N	C[N+]1(CCCCC1)C1(CCCCC1)c1ccccc1	isomerdesign.com
1-(2-Phenylbicyclo[2.2.1]heptan-2-yl)piperidine		C18H25N	C1CCN(CC1)C1(CC2CC1CC2)c1ccccc1	isomerdesign.com
1-{1-[4-(Methylsulfanyl)phenyl]cyclohexyl}piperidine	4-MeS-PCP	C18H27NS	CSc1ccc(cc1)C1(CCCCC1)N1CCCCC1	isomerdesign.com
1-[1-(Prop-1-yn-1-yl)cyclohexyl]piperidine	Propynyl-CP	C14H23N	CC#CC1(CCCCC1)N1CCCCC1	isomerdesign.com
1-(1-Ethynylcyclohexyl)piperidine	Ethynyl-CP	C13H21N	C#CC1(CCCCC1)N1CCCCC1	isomerdesign.com
1-(1-Octylcyclohexyl)piperidine	Octyl-CP	C19H37N	CCCCCCCCC1(CCCCC1)N1CCCCC1	isomerdesign.com
1-(1-Butylcyclohexyl)piperidine	Butyl-CP	C15H29N	CCCCC1(CCCCC1)N1CCCCC1	isomerdesign.com
1-(1-Ethylcyclohexyl)piperidine	Ethyl-CP	C13H25N	CCC1(CCCCC1)N1CCCCC1	isomerdesign.com
1-[1-(Thiophen-3-yl)cyclohexyl]piperidine	T3CP	C15H23NS	C1CCN(CC1)C1(CCCCC1)c1cscc1	isomerdesign.com
1-[2-(2-Fluorophenyl)bicyclo[2.2.1]heptan-2-yl]piperidine	2F-PCBHP	C18H24FN	Fc1ccccc1C1(CC2CC1CC2)N1CCCCC1	isomerdesign.com
2-[4-(Trifluoromethyl)phenyl]bicyclo[2.2.1]heptan-2-amine	4-CF3-PBCHA	C14H16F3N	NC1(CC2CC1CC2)c1ccc(cc1)C(F)(F)F	isomerdesign.com
2-(4-Fluorophenyl)bicyclo[2.2.1]heptan-2-amine	4F-PBCHA	C13H16FN	Fc1ccc(cc1)C1(N)CC2CC1CC2	isomerdesign.com
2-(3-Fluorophenyl)bicyclo[2.2.1]heptan-2-amine	3F-PBCHA	C13H16FN	Fc1cccc(c1)C1(N)CC2CC1CC2	isomerdesign.com
2-(2-Fluorophenyl)bicyclo[2.2.1]heptan-2-amine	2F-PBCHA	C13H16FN	Fc1ccccc1C1(N)CC2CC1CC2	isomerdesign.com
1-[1-(3-Methylphenyl)cyclohexyl]piperidin-3-ol	3″-HO-3-Me-PCP	C18H27NO	OC1CCCN(C1)C1(CCCCC1)c1cccc(c1)C	isomerdesign.com
N-Ethyl-N-methyl-1-(2-methylphenyl)cyclohexan-1-amine	2-Me-PCEM	C16H25N	CCN(C1(CCCCC1)c1ccccc1C)C	isomerdesign.com
2-Phenylbicyclo[2.2.1]heptan-2-amine	PBCHA	C13H17N	NC1(CC2CC1CC2)c1ccccc1	isomerdesign.com
1-[1-(4-Fluorophenyl)cycloheptyl]pyrrolidine	4F-PCHEPy	C17H24FN	Fc1ccc(cc1)C1(CCCCCC1)N1CCCC1	isomerdesign.com
1-[1-(4-Fluorophenyl)cycloheptyl]piperidine	4F-PCHEP	C18H26FN	Fc1ccc(cc1)C1(CCCCCC1)N1CCCCC1	isomerdesign.com

## Sheet: Confirmed Inactives
Name	Abbreviation	Common Name	Molecular Formula	Stereochemistry/Conformation Info	Synonym Pharmaceutical Name	Chemical Class	SMILES	Canonical SMILES	Kd, Ki, or pKi	IC50 (nM)	Reference Ligand	References/Citations
1-(naphthalen-2-yl)-2-propyl-1,2,3,4‐tetrahydroisoquinoline			C22H23N			tetrahydroisoquinoline	CCCN1CCC2=C(C=CC=C2)C1C1=CC=C2C=CC=CC2=C1	C=CCN1CCc2c(C1c1ccc3c(c1)cccc3)cccc2			TCP	Gray et al., 1989
2-benzyl-1,2,3,4‐tetrahydroisoquinoline			C16H17N			tetrahydroisoquinoline	C(N1CCC2=C(C1)C=CC=C2)C1=CC=CC=C1	c1ccc(cc1)CN1CCc2c(C1)cccc2			TCP	Gray et al., 1989
7‐phenyl‐6-propyl-4H,5H,6H,7H‐thieno[2,3‐c]pyridine			C16H19NS				C=CCN1CCC2=C(SC=C2)C1C1=CC=CC=C1	C=CCN1CCc2c(C1c1ccccc1)scc2			TCP	Gray et al., 1989
1‐phenyl‐2,3,4,5‐tetrahydro‐1H‐2‐benzazepine			C16H17N				C1CNC(C2=CC=CC=C2)C2=CC=CC=C2C1	c1ccc(cc1)C1NCCCc2c1cccc2			TCP	Gray et al., 1989
3',4'‐dihydro‐2'H‐spiro[cyclohexane‐1,1'‐isoquinoline]			C14H19N				C1CCC2(CC1)NCCC1=C2C=CC=C1	C1CCC2(CC1)NCCc1c2cccc1			TCP	Gray et al., 1989
3-[(4,5-Dihydro-1H-imidazol-2-ylmethyl)(4-methylphenyl)amino]phenol		Phentolamine	C17H19N3O		Regitine	imidazoline	CC1=CC=C(C=C1)N(CC2=NCCN2)C3=CC(=CC=C3)O	Cc1ccc(cc1)N(c1cccc(c1)O)CC1=NCCN1		122000	MK-801	Olmos et al., 1996
2-(naphthalen-1-ylmethyl)-4,5-dihydro-1H-imidazole		Naphazoline	C14H14N2		Naphcon-a	imidazoline	C1CN=C(N1)CC2=CC=CC3=CC=CC=C32	C1CN=C(N1)Cc1cccc2c1cccc2		150000	MK-801	Olmos et al., 1996
2-[(2-cyclopropylphenoxy)methyl]-4,5-dihydro-1H-imidazole		Cirazoline	C13H16N2O			imidazoline	C1CC1C2=CC=CC=C2OCC3=NCCN3	C1CN=C(N1)COc1ccccc1C1CC1		155000	MK-801	Olmos et al., 1996
2-(2-ethyl-2,3-dihydro-1-benzofuran-2-yl)-4,5-dihydro-1H-imidazole		Efaroxan	C13H16N2O			imidazoline	CCC1(CC2=CC=CC=C2O1)C3=NCCN3	CCC1(Cc2c(O1)cccc2)C1=NCCN1		190000	MK-801	Olmos et al., 1996
N-(2,6-Dichlorophenyl)-4,5--1H-imidazol-2-amine		Clonidine	C9H9Cl2N3		Catapres	imidazoline	C1CN=C(N1)NC2=C(C=CC=C2Cl)Cl	Clc1cccc(c1NC1=NCCN1)Cl		482000	MK-801	Olmos et al., 1996
2-(3-methoxy-2H-1,4-benzodioxin-3-yl)-4,5-dihydro-1H-imidazole	RX-821002	2-Methoxyidazoxan	C12H14N2O3			imidazoline	COC1(COC2=CC=CC=C2O1)C3=NCCN3	COC1(COc2c(O1)cccc2)C1=NCCN1		562000	MK-801	Olmos et al., 1996
2-benzyl-4,5-dihydro-1H-imidazole		Tolazoline	C10H12H2			imidazoline	C1CN=C(N1)CC2=CC=CC=C2	c1ccc(cc1)CC1=NCCN1		654000	MK-801	Olmos et al., 1996
1‐[1‐(3‐nitrophenyl)cyclohexyl]piperidine			C17H24N[N+]O[O-]				[O-][N+](=O)C1=CC=CC(=C1)C1(CCCCC1)N1CCCCC1	[O-][N+](=O)c1cccc(c1)C1(CCCCC1)N1CCCCC1			PCP	Manallack et al., 1998
1-benzylpiperidine			C12H17N				C(N1CCCCC1)C1=CC=CC=C1	C1CCN(CC1)Cc1ccccc1			PCP	Manallack et al., 1998
1‐[1‐(3‐phenylpropyl)cyclohexyl]piperidine			C20H31N				C(CC1=CC=CC=C1)CC1(CCCCC1)N1CCCCC1	C1CCC(CC1)(CCCc1ccccc1)N1CCCCC1			PCP	Manallack et al., 1998
1‐[1‐(2‐phenylpropyl)cyclohexyl]piperidine			C20H31N				CC(CC1(CCCCC1)N1CCCCC1)C1=CC=CC=C1	CC(c1ccccc1)CC1(CCCCC1)N1CCCCC1			PCP	Manallack et al., 1998
1‐[1‐(1‐phenylpropyl)cyclohexyl]piperidine			C20H31N				CCC(C1=CC=CC=C1)C1(CCCCC1)N1CCCCC1	CCC(C1(CCCCC1)N1CCCCC1)c1ccccc1			PCP	Manallack et al., 1998
1-(4-methoxyphenyl)cyclohexan-1-amine			C13H19NO			arylcyclohexylamine	COC1=CC=C(C=C1)C1(N)CCCCC1	COc1ccc(cc1)C1(N)CCCCC1	121,000 nM Ki		TCP	Thurkauf et al., 1990
acridin-9-aminium	9AA		C13H11N[N+]				[NH3+]C1=C2C=CC=CC2=NC2=CC=CC=C12	[NH3+]c1c2ccccc2nc2c1cccc2		15000 (other site)		Barygin et al., 2009
9H-fluoren-9-aminium	IEM-2117		C13H12[N+]				[NH3+]C1C2=CC=CC=C2C2=CC=CC=C12	[NH3+]C1c2ccccc2c2c1cccc2		25000 (other site)		Barygin et al., 2009
N-methylacridin-9-aminium	IEM-2129		C14H13N[N+]				C[NH2+]C1=C2C=CC=CC2=NC2=CC=CC=C12	C[NH2+]c1c2ccccc2nc2c1cccc2		40000 (other site)		Barygin et al., 2009
N-ethylacridin-9-aminium	IEM-2130		C15H15N[N+]				CC[NH2+]C1=C2C=CC=CC2=NC2=CC=CC=C12	CC[NH2+]c1c2ccccc2nc2c1cccc2		42000 (other site)		Barygin et al., 2009
(2S)‐1‐(cyclohexylmethyl)‐2‐[(2S,4S)‐2‐phenyl‐1,3‐dioxolan‐4‐yl]piperidin‐4‐one			C21H29NO3			dioxolane	[H][C@@]1(CO[C@@H](O1)C1=CC=CC=C1)[C@@H]1CC(=O)CCN1CC1CCCCC1	O=C1CCN([C@@H](C1)[C@H]1CO[C@@H](O1)c1ccccc1)CC1CCCCC1	> 100,000		TCP	Sax & Wünsch, 2006
2‐(2,2‐diphenyl‐1,3‐dioxan‐5‐yl)piperidine			C21H25NO2			dioxane	C1CCC(NC1)C1COC(OC1)(C1=CC=CC=C1)C1=CC=CC=C1	C1CCC(NC1)C1COC(OC1)(c1ccccc1)c1ccccc1	> 100,000		TCP	Sax & Wünsch, 2006
2‐[(2S,4R)‐2‐phenyl‐1,3‐dioxolan‐4‐yl]ethan‐1‐amine			C11H15NO2			dioxolane	[H][C@@]1(CCN)CO[C@@]([H])(O1)C1=CC=CC=C1	NCC[C@@H]1CO[C@@H](O1)c1ccccc1	> 100,000 nM Ki		MK-801	Aepkers & Wünsch, 2005
2‐[(2R,4R)‐2‐phenyl‐1,3‐dioxolan‐4‐yl]ethan‐1‐amine			C11H15NO2			dioxolane	[H][C@@]1(CCN)CO[C@]([H])(O1)C1=CC=CC=C1	NCC[C@@H]1CO[C@H](O1)c1ccccc1	> 100,000		MK-801	Aepkers & Wünsch, 2005
1-methylcyclohexan-1-amine	MRZ 2/641		C7H15N				CC1(N)CCCCC1	CC1(N)CCCCC1	143,330 nM Ki		MK-801	Parsons et al., 1999
4-[2-(4-benzylpiperidin-1-yl)-1-hydroxypropyl]phenol		Ifenprodil	C21H27NO2				CC(C(C1=CC=C(C=C1)O)O)N2CCC(CC2)CC3=CC=CC=C3	Oc1ccc(cc1)C(C(N1CCC(CC1)Cc1ccccc1)C)O	> 100,000 nM Ki			Lockhart et al., 1995
4-[4-(4-Chlorophenyl)-4-hydroxypiperidin-1-yl]-1-(4-fluorophenyl)butan-1-one		Haloperidol	C21H23ClFNO2				C1CN(CCC1(C2=CC=C(C=C2)Cl)O)CCCC(=O)C3=CC=C(C=C3)F	Fc1ccc(cc1)C(=O)CCCN1CCC(CC1)(O)c1ccc(cc1)Cl	> 100,000	113000	PCP (113,000 val)	Lockhart et al., 1995, Mendelsohn et al., 1984.
3-(1-Propylpiperidin-3-yl)phenol	3-PPP		C14N21NO				CCCN1CCCC(C1)C2=CC(=CC=C2)O	CCCN1CCCC(C1)c1cccc(c1)O	> 100,000			Lockhart et al., 1995
1-(4-fluorophenyl)-4-[4-(5-fluoro-2-pyrimidinyl)-1-piperazinyl]-1-butanol is a N-arylpiperazine	BMY-14802		C18H22F2N4O				C1CN(CCN1CCCC(C2=CC=C(C=C2)F)O)C3=NC=C(C=N3)F	Fc1ccc(cc1)C(CCCN1CCN(CC1)c1ncc(cn1)F)O	> 100,000			Lockhart et al., 1995
trans-3,4-Dichloro-N-methyl-N-[2-(1-pyrrolidinyl)cyclohexyl]-benzeneacetamide	U-50488H		C19H26Cl2N2O				CN(C1CCCCC1N2CCCC2)C(=O)CC3=CC(=C(C=C3)Cl)Cl	O=C(N(C1CCCCC1N1CCCC1)C)Cc1ccc(c(c1)Cl)Cl	> 3,700,000			Lockhart et al., 1995
(1S,5R,13R,14S,17R)-4-methyl-12-oxa-4-azapentacyclo[9.6.1.0^(1,13).0^(5,17).0^(7,18)]octadeca-7,9,11(18),15-tetraene-10,14-diol		Morphine	C17H19NO3				CN1CC[C@@]23[C@H]4OC5=C2C(C[C@@H]1[C@@H]3C=C[C@@H]4O)=CC=C5O	O[C@H]1C=C[C@@H]2[C@@]34[C@H]1Oc1c4c(C[C@H]2N(CC3)C)ccc1O	> 100,000 nM Ki		MK-801	Ebert et al., 1998
(1S,5R,13R,14S,17R)-12-oxa-4-azapentacyclo[9.6.1.0^(1,13).0^(5,17).0^(7,18)]octadeca-7,9,11(18),15-tetraene-10,14-diol		Normorphine	C16H17NO3				O[C@H]1C=C[C@H]2[C@H]3CC4=CC=C(O)C5=C4[C@@]2(CCN3)[C@H]1O5	O[C@H]1C=C[C@@H]2[C@@]34[C@H]1Oc1c4c(C[C@H]2NCC3)ccc1O	> 100,000		MK-801	Ebert et al., 1998
(1S,5R,13R,14S,17R)-10-methoxy-4-methyl-12-oxa-4-azapentacyclo[9.6.1.0^(1,13).0^(5,17).0^(7,18)]octadeca-7,9,11(18),15-tetraene-14-ol		Codeine	C18H21NO3				COC1=CC=C2C[C@@H]3[C@@H]4C=C[C@H](O)[C@@H]5OC1=C2[C@]45CCN3C	COc1ccc2c3c1O[C@@H]1[C@@]43CCN([C@H](C2)[C@@H]4C=C[C@@H]1O)C	> 100,000		MK-801	Ebert et al., 1998
(1S,5R,13R,17S)-10,17-dihydroxy-4-methyl-12-oxa-4-azapentacyclo[9.6.1.0^(1,13).0^(5,17).0^(7,18)]octadeca-7,9,11(18)-trien-14-one		Oxymorphone	C17H19NO4				CN1CC[C@@]23[C@H]4OC5=C2C(C[C@@H]1[C@]3(O)CCC4=O)=CC=C5O	O=C1CC[C@@]2([C@@]34[C@H]1Oc1c4c(C[C@H]2N(CC3)C)ccc1O)O	> 100,000		MK-801	Ebert et al., 1998
(1S,5R,13R,17R)-10-hydroxy-4-methyl-12-oxa-4-azapentacyclo[9.6.1.0^(1,13).0^(5,17).0^(7,18)]octadeca-7,9,11(18)-trien-14-one		Hydromorphone	C17H19NO3				CN1CC[C@@]23[C@H]4OC5=C2C(C[C@@H]1[C@@H]3CCC4=O)=CC=C5O	O=C1CC[C@@H]2[C@@]34[C@H]1Oc1c4c(C[C@H]2N(CC3)C)ccc1O	> 100,000		MK-801	Ebert et al., 1998
(1S,5R,13R,14S,17R)-14-hydroxy-4-methyl-12-oxa-4-azapentacyclo[9.6.1.0^(1,13).0^(5,17).0^(7,18)]octadeca-7,9,11(18),15-tetraen-10-yl acetate		3-Acetoxy-morphine	C19H21NO4				CN1CC[C@@]23[C@H]4OC5=C2C(C[C@@H]1[C@@H]3C=C[C@@H]4O)=CC=C5OOC(C)=O	CC(=O)OOc1ccc2c3c1O[C@@H]1[C@@]43CCN([C@H](C2)[C@@H]4C=C[C@@H]1O)C	> 100,000		MK-801	Ebert et al., 1998
(1S,5R,13R,17S)-17-hydroxy-10-methoxy-4-methyl-12-oxa-4-azapentacyclo[9.6.1.0^(1,13).0^(5,17).0^(7,18)]octadeca-7,9,11(18)-trien-14-one		Oxycodone	C18H21NO4				COC1=CC=C2C[C@H]3N(C)CC[C@@]45[C@@H](OC1=C24)C(=O)CC[C@@]35O	COc1ccc2c3c1O[C@@H]1[C@@]43CCN([C@H](C2)[C@]4(O)CCC1=O)C	> 100,000		MK-801	Ebert et al., 1998
(1S,5R,13R,17S)-10,17-dihydroxy-4-(prop-2-en-1-yl)-12-oxa-4-azapentacyclo[9.6.1.0^(1,13).0^(5,17).0^(7,18)]octadeca-7,9,11(18)-trien-14-one		Naloxone	C19H21NO4				OC1=CC=C2C[C@H]3N(CC=C)CC[C@@]45[C@@H](OC1=C24)C(=O)CC[C@@]35O	C=CCN1CC[C@@]23[C@@]4([C@H]1Cc1c3c(O[C@H]2C(=O)CC4)c(cc1)O)O	> 100,000		MK-801	Ebert et al., 1998
(1R,2R,6S,14R,15R,19R)-19-[(2R)-2-hydroxypentan-2-yl]-15-methoxy-3-methyl-13-oxa-3-azahexacyclo[13.2.2.1^(2,8).0^(1,6).0^(6,14).0^(7,12)]icosa-7(12),8,10,16-tetraen-11-ol		Etorphine	C25H33NO4				CCC[C@@](C)(O)[C@H]1C[C@]23C=C[C@]1(OC)[C@@H]1OC4=C5C(C[C@H]2N(C)CC[C@@]315)=CC=C4O	CCC[C@]([C@H]1C[C@]23C=C[C@]1(OC)[C@H]1[C@]43CCN([C@@H]2Cc2c4c(O1)c(O)cc2)C)(O)C	> 100,000		MK-801	Ebert et al., 1998
N‐phenyl‐N‐[1‐(2‐phenylethyl)piperidin‐4‐yl]propanamide		Fentanyl	C22H28N2O				CCC(=O)N(C1CCN(CCC2=CC=CC=C2)CC1)C1=CC=CC=C1	CCC(=O)N(c1ccccc1)C1CCN(CC1)CCc1ccccc1	> 100,000		MK-801	Ebert et al., 1998
1‐(4‐tert‐butyl‐1‐phenylcyclohexyl)piperidine			C21H33N			arylcyclohexylamine	CC(C)(C)C1CCC(CC1)(N1CCCCC1)C1=CC=CC=C1	CC(C1CCC(CC1)(N1CCCCC1)c1ccccc1)(C)C	100,000 nM Ki		PCP	Chaudieu et al., 1989
1‐[4‐tert‐butyl‐1‐(thiophen‐2‐yl)cyclohexyl]piperidine			C19H35NS				CC(C)(C)C1CCC(CC1)(N1CCCCC1)C1=CC=CS1	CC(C1CCC(CC1)(N1CCCCC1)c1cccs1)(C)C	100000		PCP	Chaudieu et al., 1989
4-Aminobutanoic acid	GABA	gamma-aminobutyric acid	C4H9NO2				NCCCC(=O)O	NCCCC(=O)O			PCP	Zukin & Zukin, 1979
2-Aminoacetic acid		glycine	C2H5NO2				C(C(=O)O)N	NCC(=O)O			PCP	Zukin & Zukin, 1979
2-Aminopentanedioic acid		glutamic acid	C5H9NO4				C(CC(=O)O)[C@@H](C(=O)O)N	OC(=O)CC[C@@H](C(=O)O)N			PCP	Zukin & Zukin, 1979
5-Hydroxytryptamine	5-HT	serotonin	C10H12N2O				C1=CC2=C(C=C1O)C(=CN2)CCN	NCCc1c[nH]c2c1cc(O)cc2			PCP	Zukin & Zukin, 1979
1-methyl-D-lysergic acid butanolamide	UML-491	methysergide	C21H27N3O2				O=C(N[C@@H](CC)CO)[C@@H]3/C=C2/c4cccc1c4c(cn1C)C[C@H]2N(C3)C	CC[C@H](NC(=O)[C@H]1CN(C)[C@H]2C(=C1)c1cccc3c1c(C2)cn3C)CO			PCP	Zukin & Zukin, 1979
(6aR,9R)-N,N-diethyl-7-methyl-4,6,6a,7,8,9-hexahydroindolo[4,3-fg]quinoline-9-carboxamide	LSD	lysergic acid diethylamide	C20H25N3O				CCN(CC)C(=O)[C@H]1CN([C@@H]2Cc3c[nH]c4c3c(ccc4)C2=C1)C	CCN(C(=O)[C@H]1CN(C)[C@H]2C(=C1)c1cccc3c1c(C2)c[nH]3)CC			PCP	Zukin & Zukin, 1979
(2S)-2-[[(2S)-2-[[2-[[2-[[(2S)-2-Smino-3-(4-hydroxyphenyl)propanoyl]amino]acetyl]amino]acetyl]amino]-3-phenylpropanoyl]amino]-4-methylsulfanylbutanoic acid		[Met]enkephalin	C27H35N5O7S				CSCCC(C(=O)O)NC(=O)C(CC1=CC=CC=C1)NC(=O)CNC(=O)CNC(=O)C(CC2=CC=C(C=C2)O)N	CSCCC(C(=O)O)NC(=O)C(Cc1ccccc1)NC(=O)CNC(=O)CNC(=O)C(Cc1ccc(cc1)O)N			PCP	Zukin & Zukin, 1979
(2S,6R,11R)-3-(cyclopropylmethyl)-8-hydroxy-6,11-dimethyl-3,4,5,6-tetrahydro-2,6-methano-3-benzazocin-1(2H)-one		ketocyclazocine	C18H23NO2				O=C2c1c(cc(O)cc1)[C@]3([C@H]([C@@H]2N(CC3)CC4CC4)C)C	Oc1ccc2c(c1)[C@]1(C)CCN([C@H](C2=O)[C@@H]1C)CC1CC1			PCP	Zukin & Zukin, 1979
(6aR)-6-methyl-5,6,6a,7-tetrahydro-4H-dibenzo[de,g]quinoline-10,11-diol		apomorphine	C17H17NO2		Apokyn		OC1=C(O)C(C2=CC=CC3=C2[C@@H](C4)N(C)CC3)=C4C=C1	CN1CCc2c3[C@H]1Cc1ccc(c(c1c3ccc2)O)O			PCP	Zukin & Zukin, 1979
(RS)-1-(2-allylphenoxy)-3-(isopropylamino)propan-2-ol		alprenolol	C15H23NO2				O(c1ccccc1C\C=C)CC(O)CNC(C)C	C=CCc1ccccc1OCC(CNC(C)C)O			PCP	Zukin & Zukin, 1979
2-(1H-imidazol-5-yl)ethanamine;phosphoric acid		histamine diphosphate	C5H15N3O8P2				C1=C(NC=N1)CCN.OP(=O)(O)O.OP(=O)(O)O	OP(=O)(O)O.OP(=O)(O)O.NCCc1cnc[nH]1			PCP	Zukin & Zukin, 1979
(Z)-but-2-enedioic acid;N'-[(4-methoxyphenyl)methyl]-N,N-dimethyl-N'-pyridin-2-ylethane-1,2-diamine		pyrilamine maleate	C21H27N305				CN(C)CCN(CC1=CC=C(C=C1)OC)C2=CC=CC=N2.C(=CC(=O)O)C(=O)O	OC(=O)C=CC(=O)O.COc1ccc(cc1)CN(c1ccccn1)CCN(C)C			PCP	Zukin & Zukin, 1979
(R)-4-(2-amino-1-hydroxyethyl)benzene-1,2-diol		norepinephrine	C8H11NO3				C1=CC(=C(C=C1C(CN)O)O)O	NCC(c1ccc(c(c1)O)O)O			PCP	Zukin & Zukin, 1979
2-(2,6-Dimethoxyphenoxyethyl)aminomethyl-1,4-benzodioxane	WB-4101		C19H23NO5				COc1cccc(c1OCCNCC2COc3ccccc3O2)OC	COc1cccc(c1OCCNCC1COc2c(O1)cccc2)OC			PCP	Zukin & Zukin, 1979
7-Chloro-1,3-dihydro-1-methyl-5-phenyl-3H-1,4-benzodiazepin-2-one		diazepam	C16H13ClN2O		Valium	benzodiazepine	CN1C2=C(C(C3=CC=CC=C3)=NCC1=O)C=C(Cl)C=C2	Clc1ccc2c(c1)C(=NCC(=O)N2C)c1ccccc1			PCP	Zukin & Zukin, 1979
2-(diethylamino)ethyl 4-aminobenzoate		procaine	C13H20N2O2		Novocain		O=C(OCCN(CC)CC)c1ccc(N)cc1	CCN(CCOC(=O)c1ccc(cc1)N)CC			PCP	Zukin & Zukin, 1979
2-(diethylamino)-N-(2,6-dimethylphenyl)acetamide		lidocaine	C14H22N2O				O=C(Nc1c(cccc1C)C)CN(CC)CC	CCN(CC(=O)Nc1c(C)cccc1C)CC			PCP	Zukin & Zukin, 1979
1‐methyl‐1‐(1‐phenylcyclohexyl)piperidin‐1‐ium			C18H28[N+]			arylcyclohexylamine	C[N+]1(CCCCC1)C1(CCCCC1)C1=CC=CC=C1	C[N+]1(CCCCC1)C1(CCCCC1)c1ccccc1				Pang: Structure-Activity Relationships...
(2R,6R)-2-amino-2-(2-chlorophenyl)-6-hydroxycyclohexan-1-one	HNK	6-hydroxynorketamine	C12H14ClNO2				N[C@]1(CCC[C@@H](O)C1=O)C1=CC=CC=C1Cl	O[C@@H]1CCC[C@@](C1=O)(N)c1ccccc1Cl			MK-801	Zanos et al., 2016
(2S)‐2‐amino‐1,2‐diphenylethan‐1‐ol			C14H15NO	S			N[C@H](C(O)C1=CC=CC=C1)C1=CC=CC=C1	N[C@H](C(c1ccccc1)O)c1ccccc1	142000		MK-801	Berger et al., 2009
(1R)‐1,2‐dicyclohexylethan‐1‐amine			C14H27N	R			N[C@H](CC1CCCCC1)C1CCCCC1	N[C@@H](C1CCCCC1)CC1CCCCC1	138000		MK-801	Berger et al., 2009
(1S)‐1,2‐dicyclohexylethan‐1‐amine			C14H27N	S			N[C@@H](CC1CCCCC1)C1CCCCC1	N[C@H](C1CCCCC1)CC1CCCCC1	271000		MK-801	Berger et al., 2009
1-phenylmethanamine			C7H9N				NCC1=CC=CC=C1	NCc1ccccc1	1446500		MK-801	Berger et al., 2009
2-phenylethan-1-amine			C8H11N				NCCC1=CC=CC=C1	NCCc1ccccc1	753000		MK-801	Berger et al., 2009
(1R)-1-phenylethan-1-amine			C8H11N	R			C[C@@H](N)C1=CC=CC=C1	C[C@H](c1ccccc1)N	666500		MK-801	Berger et al., 2009
(1S)-1-phenylethan-1-amine			C8H11N	S			C[C@H](N)C1=CC=CC=C1	C[C@@H](c1ccccc1)N	640500		MK-801	Berger et al., 2009
(2R)‐1‐phenylpropan‐2‐amine			C9H13N	R			C[C@@H](N)CC1=CC=CC=C1	C[C@H](Cc1ccccc1)N	625000		MK-801	Berger et al., 2009
(2S)‐1‐phenylpropan‐2‐amine			C9H13N	S			C[C@H](N)CC1=CC=CC=C1	C[C@@H](Cc1ccccc1)N	300000		MK-801	Berger et al., 2009
methyl (2R)‐2‐amino‐3‐phenylpropanoate			C10H13NO2	R			COC(=O)[C@H](N)CC1=CC=CC=C1	COC(=O)[C@@H](Cc1ccccc1)N	855000		MK-801	Berger et al., 2009
methyl (2S)‐2‐amino‐3‐phenylpropanoate			C10H13NO2	S			COC(=O)[C@@H](N)CC1=CC=CC=C1	COC(=O)[C@H](Cc1ccccc1)N	701000		MK-801	Berger et al., 2009
2,2-diphenylethan-1-amine			C14H15N				NCC(C1=CC=CC=C1)C1=CC=CC=C1	NCC(c1ccccc1)c1ccccc1	148500		MK-801	Berger et al., 2009
methyl (2R)‐2‐amino‐3‐phenylacetate			C9H11NO2	R			COC(=O)[C@H](N)C1=CC=CC=C1	COC(=O)[C@@H](c1ccccc1)N	1372000		MK-801	Berger et al., 2009
methyl (2S)‐2‐amino‐3‐phenylacetate			C9H11NO2	S			COC(=O)[C@@H](N)C1=CC=CC=C1	COC(=O)[C@H](c1ccccc1)N	1978000		MK-801	Berger et al., 2009
(1R,2S)‐2‐phenylcyclopropan‐1‐amine			C9H11N	(-)			[H][C@@]1(N)C[C@@]1([H])C1=CC=CC=C1	N[C@@H]1C[C@H]1c1ccccc1	544000		MK-801	Berger et al., 2009
(1S,2R)‐2‐phenylcyclopropan‐1‐amine			C9H11N	(+)			[H][C@]1(N)C[C@]1([H])C1=CC=CC=C1	N[C@H]1C[C@@H]1c1ccccc1	269000		MK-801	Berger et al., 2009
ethyl 2-{9,16-dihydroxy-16-azatetracyclo[7.6.1.02,7.010,15]hexadeca-2,4,6,10,12,14-hexaen-1-yl}acetate			C19H19NO4				CCOC(=O)CC12N(O)C(O)(CC3=CC=CC=C13)C1=CC=CC=C21	CCOC(=O)CC12c3ccccc3CC(N2O)(c2c1cccc2)O	> 4,500,000		MK-801	Thompson et al., 1990
[phenyl({16-azatetracyclo[7.6.1.02,7.010,15]hexadeca-2,4,6,10,12,14-hexaen-1-yl}methyl)-lambda3-sulfanyl]ol			C22H20NOS				O=S(CC12NC(CC3=CC=CC=C13)C1=CC=CC=C21)C1=CC=CC=C1	O=S(c1ccccc1)CC12NC(c3c2cccc3)Cc2c1cccc2	>160,000		MK-801	Thompson et al., 1990
2-{9-hydroxy-16-azatetracyclo[7.6.1.02,7.010,15]hexadeca-2,4,6,10,12,14-hexaen-1-yl}ethane-1,1-diol			C17H17NO3				OC(=O)CC12NC(O)(CC3=CC=CC=C13)C1=CC=CC=C21	OC(=O)CC12NC(c3c2cccc3)(O)Cc2c1cccc2	280000		MK-801	Thompson et al., 1990
2-{9-chloro-16-azatetracyclo[7.6.1.02,7.010,15]hexadeca-2,4,6,10,12,14-hexaen-1-yl}acetic acid			C17H14ClNO2				OC(=O)CC12NC(Cl)(CC3=CC=CC=C13)C1=CC=CC=C21	OC(=O)CC12NC(c3c2cccc3)(Cl)Cc2c1cccc2	> 4,500,000		MK-801	Thompson et al., 1990
2-[(1S)-16-azatetracyclo[7.6.1.02,7.010,15]hexadeca-2,4,6,10,12,14-hexaen-1-yl]-2-hydroxyacetic acid			C17H15NO3				OC(C(O)=O)[C@]12NC(CC3=CC=CC=C13)C1=CC=CC=C21	OC(=O)C([C@]12NC(c3c2cccc3)Cc2c1cccc2)O	> 1,000,000		MK-801	Thompson et al., 1990
17-methyl-17-azatetracyclo[8.6.1.02,7.011,16]heptadeca-2(7),3,5,11(16),12,14-hexaen-1-ol			C17H17NO				CN1C2CCC3=C(C=CC=C3)C1(O)C1=C2C=CC=C1	CN1C2CCc3c(C1(O)c1c2cccc1)cccc3	> 100,000		MK-801	Thompson et al., 1990
17-methyl-17-azatetracyclo[7.7.1.02,7.011,16]heptadeca-2(7),3,5,11(16),12,14-hexaen-1-ol			C17H17NO				CN1C2CC3=C(C=CC=C3)C1(O)C1=C(C2)C=CC=C1	CN1C2Cc3c(C1(O)c1c(C2)cccc1)cccc3	290000		MK-801	Thompson et al., 1990
(8R)-16-azatetracyclo[7.6.1.02,7.010,15]hexadeca-2,4,6,10,12,14-hexaen-8-ol			C15H13NO				[H][C@]1(O)C2NC(C3=CC=CC=C23)C2=CC=CC=C12	O[C@@H]1c2ccccc2C2NC1c1ccccc21	110000		MK-801	Thompson et al., 1990

## Sheet: Known PCP Site Antagonists
Name	Abbreviation	Common Name	Molecular Formula	Stereochemistry/Conformation Info	Synonym Pharmaceutical Name	Chemical Class	Type	Location	SMILES	Canonical SMILES	Kd, Ki, or pKi	IC50 (nM)	Reference Ligand	References/Citations
1-[1-(Thiophen-2-yl)cyclohexyl]piperidine	TCP	tenocyclidine	C15H23NS			arylcyclohexylamine	uncompetitive NMDAR antagonist	PCP-site (ion channel)	C1CCN(CC1)C1(CCCCC1)c1cccs1	C1CCN(CC1)C1(CCCCC1)c1cccs1	265 nM Ki	11, 160	MK-801 (11 val), PCP (160 val)	Kozikowski & Pang, 1990. Zukin & Zukin, 1979.
1-(1-Phenylcyclohexyl)pyrrolidine	PCPy, PHP	rolicyclidine	C16H23N			arylcyclohexylamine	uncompetitive NMDAR antagonist	PCP-site (ion channel)	C1CCC(CC1)(N1CCCC1)c1ccccc1	C1CCC(CC1)(N1CCCC1)c1ccccc1		140, 85, 290, 200	PCP (85, 200 vals), MK-801 (290 val)	Kozlowski et al., 1986. Domino & Kamenka, 1988. Zukin & Zukin, 1979.
1-(1-Phenylcyclohexyl)piperidine	PCP	phencyclidine	C17H25N			arylcyclohexylamine	uncompetitive NMDAR antagonist	PCP-site (ion channel)	C1CCC(CC1)(N1CCCCC1)c1ccccc1	C1CCC(CC1)(N1CCCCC1)c1ccccc1	20-23, 59, 57.9, 70	32-37, 27.3, 66, 35, 91, 36.5	MK-801(59, 35, 57.9, 91 val), TCP(66, 70, 36.5 val)	Colestock et al., 2018. Mendelsohn et al., 1984. Roth et al., 2013. Largent et al., 1986. Stefek et al., 1990. Kozikowski & Pang, 1990. Wallach, 2014. Thurkauf et al., 1990. Bigge et al., 1993.
4-(1-Phenylcyclohexyl)morpholine	PCMo, PCM		C16H23NO			arylcyclohexylamine	uncompetitive NMDAR antagonist	PCP-site (ion channel)	C1CCC(CC1)(N1CCOCC1)c1ccccc1	C1CCC(CC1)(N1CCOCC1)c1ccccc1	334.1 nM Ki	511-538, 2400	MK-801, PCP (2400 val)	Colestock et al., 2018. Zukin & Zukin, 1979.
1-[1-(4-Methoxyphenyl)cyclohexyl]piperidine	4-MeO-PCP	methoxydine	C18H27NO			anisylcyclohexylamine	uncompetitive NMDAR antagonist	PCP-site (ion channel)	COc1ccc(cc1)C1(CCCCC1)N1CCCCC1	COc1ccc(cc1)C1(CCCCC1)N1CCCCC1	620, 404, 500, 1200 nM Ki	972.8	MK-801 (620, 404, 972.8 vals)	Roth et al., 2013. Wallach, 2014.
4-[1-(4-Methoxyphenyl)cyclohexyl]morpholine	4-MeO-PCMo		C17H25NO2			arylcyclohexylmorpholine	uncompetitive NMDAR antagonist	PCP-site (ion channel)	COc1ccc(cc1)C1(CCCCC1)N1CCOCC1	COc1ccc(cc1)C1(CCCCC1)N1CCOCC1	2118 nM Ki	2983-3669	MK-801	Colestock et al., 2018.
4-[1-(3-Methylphenyl)cyclohexyl]morpholine	3-Me-PCMo		C17H25NO			arylcyclohexylmorpholine	uncompetitive NMDAR antagonist	PCP-site (ion channel)	Cc1cccc(c1)C1(CCCCC1)N1CCOCC1	Cc1cccc(c1)C1(CCCCC1)N1CCOCC1	201.8 nM Ki	288-345	MK-801	Colestock et al., 2018.
1-[1-(3-Methoxyphenyl)cyclohexyl]pyrrolidine	3-MeO-PCPy		C17H25NO			anisylcyclohexylamine	uncompetitive NMDAR antagonist	PCP-site (ion channel)	CCCNC1(CCCCC1)c1cccc(c1)OC	COc1cccc(c1)C1(CCCCC1)N1CCCC1	22.3 nM Ki	35	MK-801	Wallach & Brandt, 2018. Wallach, 2014.
1-(3-Methoxyphenyl)-N-propylcyclohexan-1-amine	3-MeO-PCPr		C16H23NO			anisylcyclohexylamine	uncompetitive NMDAR antagonist	PCP-site (ion channel)	CCCNC1(CCCCC1)c1cccc(c1)OC	CCCNC1(CCCCC1)c1cccc(c1)OC	17.9 nM Ki	28.2	MK-801	Wallach & Brandt, 2018. Wallach, 2014.
1-[1-(3-Methoxyphenyl)cyclohexyl]piperidine	3-MeO-PCP		C18H27NO			anisylcyclohexylamine	uncompetitive NMDAR antagonist	PCP-site (ion channel)	COc1cccc(c1)C1(CCCCC1)N1CCCCC1	COc1cccc(c1)C1(CCCCC1)N1CCCCC1	20, 38.1 nM Ki	90, 59.8	MK-801	Roth et al., 2013. Wallach, 2014.
4-[1-(3-Methoxyphenyl)cyclohexyl]morpholine	3-MeO-PCMo		C17H25NO2			arylcyclohexylmorpholine	uncompetitive NMDAR antagonist	PCP-site (ion channel)	COc1cccc(c1)C1(CCCCC1)N1CCOCC1	COc1cccc(c1)C1(CCCCC1)N1CCOCC1	252.9 nM Ki	352-442	MK-801	Colestock et al., 2018.
1-(3-Methoxyphenyl)-N-methylcyclohexan-1-amine	3-MeO-PCMe		C14H21NO				uncompetitive NMDAR antagonist	PCP-site (ion channel)	CNC1(CCCCC1)c1cccc(c1)OC	CNC1(CCCCC1)c1cccc(c1)OC	145.1 nM Ki	384, 227.9	MK-801 (145.1, 227.9 res)	Wallach & Brandt, 2018. Wallach, 2014.
N-Ethyl-1-(3-methoxyphenyl)cyclohexan-1-amine	3-MeO-PCE	methoxieticyclidine	C15H23NO			anisylcyclohexylamine	uncompetitive NMDAR antagonist	PCP-site (ion channel)	CCNC1(CCCCC1)c1cccc(c1)OC	CCNC1(CCCCC1)c1cccc(c1)OC	30.4, 61, 99 nM Ki	99, 47.8	MK-801 (61, 30.4, 47.8 vals), PCP (IC50 val)	Roth et al., 2013. Domino & Kamenka, 1988. Wallach, 2014.
3-[1-(Piperidin-1-yl)cyclohexyl]phenol	3-HO-PCP		C17H25NO				uncompetitive NMDAR antagonist	PCP-site (ion channel)	Oc1cccc(c1)C1(CCCCC1)N1CCCCC1	Oc1cccc(c1)C1(CCCCC1)N1CCCCC1	30 nM Ki	7.4		Wallach & Brandt, 2018
3-[1-(Ethylamino)cyclohexyl]phenol	3-HO-PCE		C14H21NO				uncompetitive NMDAR antagonist	PCP-site (ion channel)	CCNC1(CCCCC1)c1cccc(c1)O	CCNC1(CCCCC1)c1cccc(c1)O		23	PCP	Wallach & Brandt, 2018. Domino & Kamenka, 1988.
1-(1,3-Benzodioxol-5-yl)-N-propylcyclohexanamine	3,4-MD-PCPr		C16H23NO2				uncompetitive NMDAR antagonist	PCP-site (ion channel)	CCCNC1(CCCCC1)c1ccc2c(c1)OCO2	CCCNC1(CCCCC1)c1ccc2c(c1)OCO2	24.9 nM Ki	39	MK-801	Wallach & Brandt, 2018. Wallach, 2014.
4-[1-(1,3-Benzodioxol-5-yl)cyclohexyl]morpholine	3,4-MD-PCMo		C17H23NO3			arylcyclohexylmorpholine	uncompetitive NMDAR antagonist	PCP-site (ion channel)	C1CCC(CC1)(N1CCOCC1)c1ccc2c(c1)OCO2	C1CCC(CC1)(N1CCOCC1)c1ccc2c(c1)OCO2	425.5 nM Ki	638-698	MK-801	Colestock et al., 2018.
1-(1,3-Benzodioxol-5-yl)-N-ethylcyclohexanamine	3,4-MD-PCE		C15H21NO2				uncompetitive NMDAR antagonist	PCP-site (ion channel)	CCNC1(CCCCC1)c1ccc2c(c1)OCO2	CCNC1(CCCCC1)c1ccc2c(c1)OCO2	35.5 nM Ki	55.7	MK-801	Wallach & Brandt, 2018. Wallach, 2014.
4-[1-(2-Methoxyphenyl)cyclohexyl]morpholine	2-MeO-PCMo		C17H25NO2			arylcyclohexylmorpholine	uncompetitive NMDAR antagonist	PCP-site (ion channel)	COc1ccccc1C1(CCCCC1)N1CCOCC1	COc1ccccc1C1(CCCCC1)N1CCOCC1	1505-1651 nM Ki	2362-2592		Colestock et al., 2018.
(5S,10R)-5-methyl-10,11-dihydro-5H-5,10-epiminodibenzo[a,d][7]annulene	MK-801	dizocilpine	C16H15N	(+)		dibenzocycloalkenamine	uncompetitive NMDAR antagonist	PCP-site (ion channel)	C[C@@]12C3=C([C@@H](CC4=C1C=CC=C4)N2)C=CC=C3	C[C@]12N[C@@H](c3c2cccc3)Cc2c1cccc2	2.5, 56, 8, 10	9-38, 15.2, 2.92	TCP (8 Ki, 2.92 IC50), MK-801 (10, 15.2, 56 vals)	Ogden: New Advances in..., Elhallaoui et al., 2003.Monn et al., 1990. Wallach, 2014. Bigge et al., 1993. Thompson et al., 1990.
2-(2-Chlorophenyl)-2-(methylamino)cyclohexan-1-one		ketamine	C13H16ClNO			arylcyclohexylamine	uncompetitive NMDAR antagonist	PCP-site (ion channel)	ClC1=C(C=CC=C1)C1(C(CCCC1)=O)NC	CNC1(CCCCC1=O)c1ccccc1Cl	760 nM Ki, 530 nM Ki, 659, 119	508.5, 405, 1600, 1000, 860	MK-801 (Roth, Salat, Olmos), PCP (1000 val), TCP (860 val)	Mendelsohn et al., 1984. Hashimoto: The NMDA Receptors, Roth et al., 2013. Salat et al., 2015. Olmos et al., 1996. Zukin & Zukin, 1979. Bigge et al., 1993.
(2S)‐2‐(2‐chlorophenyl)‐2‐(methylamino)cyclohexan‐1‐one		(S)-ketamine	C13H16ClNO	(S)		arylcyclohexylamine	uncompetitive NMDAR antagonist	PCP-site (ion channel)	CN[C@@]1(CCCCC1=O)C1=C(Cl)C=CC=C1	CN[C@@]1(CCCCC1=O)c1ccccc1Cl	300, 500, 960 nM Ki		MK-801 (500, 960 vals)	Hashimoto: The NMDA Receptors, Rammes et al., 2001. Berger
(2R)‐2‐(2‐chlorophenyl)‐2‐(methylamino)cyclohexan‐1‐one		(R)-ketamine	C13H16ClNO	(R)		arylcyclohexylamine	uncompetitive NMDAR antagonist	PCP-site (ion channel)	CN[C@]1(CCCCC1=O)C1=C(Cl)C=CC=C1	CN[C@]1(CCCCC1=O)c1ccccc1Cl	1400, 5680 nM Ki		MK-801(5680 val)	Hashimoto: The NMDA Receptors, Berger
3,5-Dimethyladamantan-1-amine		memantine	C12H21N		Namenda	adamantine, aminoadamantane	uncompetitive NMDAR antagonist	PCP-site (ion channel)	CC12CC3(CC(CC(C1)(C3)C)C2)N	CC12CC3CC(C1)(C)CC(C2)(C3)N	2500 nM Ki	594.2	MK-801(Ki)	Rammes et al., 2001
Adamantan-1-amine		amantadine	C10H17N			adamantine, aminoadamantane	uncompetitive NMDAR antagonist	PCP-site (ion channel)	C12(CC3CC(CC(C1)C3)C2)N	NC12CC3CC(C2)CC(C1)C3	25,900 nM Ki	35000	MK-801	Rammes et al., 2001
(4bS,8aR,9S)-3-Methoxy-11-methyl-6,7,8,8a,9,10-hexahydro-5H-9,4b-(epiminoethano)phenanthrene	DXM	dextromethorphan	C18H25NO			morphinan	uncompetitive NMDAR antagonist	PCP-site (ion channel)	CN1CC[C@@]23CCCC[C@@H]2[C@@H]1CC4=C3C=C(C=C4)OC	COc1ccc2c(c1)[C@@]13CCCC[C@@H]3[C@H](C2)N(CC1)C	2120 nM Ki		MK-801	Werling et al., 2007
D-3-Hydroxy-N-methylmorphinan	DXO	dextrorphan	C17H23NO				uncompetitive NMDAR antagonist	PCP-site (ion channel)	CN1CC[C@@]23CCCC[C@@H]2[C@@H]1CC4=C3C=C(C=C4)O	Oc1ccc2c(c1)[C@@]13CCCC[C@@H]3[C@H](C2)N(CC1)C	892 nM Ki	150-1300, 281	MK-801(Ki)	Werling et al., 2007. Ogden: New Advances in..., Mendelsohn et al., 1984.
2-(3-methoxyphenyl)-2-(N-ethylamino)cyclohexanone	MXE	methoxetamine	C17H21NO2			arylcyclohexylamine	uncompetitive NMDAR antagonist	PCP-site (ion channel)	COC=1C=C(C=CC1)C1(C(CCCC1)=O)NCC	CCNC1(CCCCC1=O)c1cccc(c1)OC	259 nM Ki		MK-801	Roth et al., 2013
(2S)-2-[(4S)-2,2-diphenyl-1,3-dioxolan-4-yl]piperidine		dexoxadrol	C20H23NO2	(S,S)		dioxolane	uncompetitive NMDAR antagonist	PCP-site (ion channel)	C1CCN[C@@H](C1)[C@H]2COC(O2)(C3=CC=CC=C3)C4=CC=CC=C4	C1CC[C@H](NC1)[C@H]1COC(O1)(c1ccccc1)c1ccccc1	112 nM Ki	20.6, 41 nM IC50	TCP (41 IC50)	Sax & Wünsch, 2006. Mendelsohn et al., 1984. Largent et al., 1986.
2-(2-ethyl-2-phenyl-1,3-dioxolan-4-yl)piperidine		etoxadrol	C16H23NO2	(S,S,S)		dioxolane	uncompetitive NMDAR antagonist	PCP-site (ion channel)	C(C)C1(OCC(O1)C1NCCCC1)C1=CC=CC=C1	CCC1(OCC(O1)C1CCCCN1)c1ccccc1	107 nM Ki	75.7 nM IC50		Sax & Wünsch, 2006. Mendelsohn et al., 1984. Largent et al., 1986.
1,3,3,5,5-pentamethylcyclohexan-1-amine	MRZ 2/579	neramexane	C11H23N			aminoalkylcyclohexane	uncompetitive NMDAR antagonist	PCP-site (ion channel)	CC1(CC(CC(C1)(C)C)(C)C)N, NC1(CC(CC(C1)(C)C)(C)C)C	CC1(C)CC(C)(C)CC(C1)(C)N	650-1400 nM Ki, 1470 nM Ki		MK-801 (Parsons, Rammes)	Nicholson & Balster, 2003. Rammes et al., 2001. Parsons et al., 1999.
(1S)-1-Phenyl-2-pyridin-2-ylethanamine	AZD6765	lanicemine	C13H14N2	S			uncompetitive NMDAR antagonist	PCP-site (ion channel)	N[C@H](C1=CC=CC=C1)CC2=NC=CC=C2	N[C@H](c1ccccc1)Cc1ccccn1	560-1,480, 14,000 nM Ki		MK-801	Zarate Jr: A Randomized Trial..., Berger
(1R,9R,13E)-1-Amino-13-ethylidene-11-methyl-6-azatricyclo[7.3.1.0²,⁷]trideca-2(7),3,10-trien-5-one	HUP-A	huperzine-A	C15H18N2O				uncompetitive NMDAR antagonist	PCP-site (ion channel)	C/C=C/1\[C@@H]2CC3=C([C@]1(CC(=C2)C)N)C=CC(=O)N3	C/C=C/1\[C@H]2C=C(C[C@]1(N)c1c(C2)[nH]c(=O)cc1)C	6000 nM pseudo Ki		MK-801 & TCP	Gordon et al., 2001
1-(1,2-diphenylethyl)piperidine	DPH, DEP	diphenidine	C19H23N	S		diphenylethylamine	uncompetitive NMDAR antagonist	PCP-site (ion channel)	C([C@H](N1CCCCC1)C1=CC=CC=C1)C1=CC=CC=C1	c1ccc(cc1)C[C@@H](c1ccccc1)N1CCCCC1	16-20 nM Ki, 125 nM Ki	26-32	MK-801	Wallach et al., 2016. Berger et al., 2009.
1-[1-(2-chlorophenyl)-2-phenylethyl]piperidine	2-Cl-DPH	2-Cl-diphenidine	C19H22ClN			diphenylethylamine	uncompetitive NMDAR antagonist	PCP-site (ion channel)	ClC1=C(C=CC=C1)C(CC1=CC=CC=C1)N1CCCCC1	Clc1ccccc1C(N1CCCCC1)Cc1ccccc1	8-10 nM Ki	13-16	MK-801	Wallach et al., 2016
1-[1-(2-methoxyphenyl)-2-phenylethyl]piperidine	2-MXP, 2-MeO-Diphenidine	methoxphenidine	C20H25NO			diphenylethylamine	uncompetitive NMDAR antagonist	PCP-site (ion channel)	COC1=C(C=CC=C1)C(CC1=CC=CC=C1)N1CCCCC1	COc1ccccc1C(N1CCCCC1)Cc1ccccc1	33-39 nM Ki	51-62	MK-801	Wallach et al., 2016
1-[1-(3-methoxyphenyl)-2-phenylethyl]piperidine	3-MXP, 3-MeO-Diphenidine	3-methoxy-diphenidine	C20H25NO				uncompetitive NMDAR antagonist	PCP-site (ion channel)	COC=1C=C(C=CC1)C(CC1=CC=CC=C1)N1CCCCC1	COc1cccc(c1)C(N1CCCCC1)Cc1ccccc1	18-21 nM Ki	28-32	MK-801	Wallach et al., 2016
1-[1-(4-methoxyphenyl)-2-phenylethyl]piperidine	4-MXP, 4-MeO-Diphenidine	4-methoxy-diphenidine	C20H25NO				uncompetitive NMDAR antagonist	PCP-site (ion channel)	COC1=CC=C(C=C1)C(CC1=CC=CC=C1)N1CCCCC1	COc1ccc(cc1)C(N1CCCCC1)Cc1ccccc1	417-505 nM Ki	654-793	MK-801	Wallach et al., 2016
2-amino-2-(2-chlorophenyl)cyclohexan-1-one		norketamine	C12H14ClNO				uncompetitive NMDAR antagonist	PCP-site (ion channel)	NC1(C(CCCC1)=O)C1=C(C=CC=C1)Cl	O=C1CCCCC1(N)c1ccccc1Cl	970 nM Ki		MK-801	Salat et al., 2015
N-Ethyl-1,2-diphenylethanamine	NEDPA, EPE	ephenidine	C16H19N			diphenylethylamine	uncompetitive NMDAR antagonist	PCP-site (ion channel)	C(C)NC(CC1=CC=CC=C1)C1=CC=CC=C1	CCNC(c1ccccc1)Cc1ccccc1	63-70 nM Ki	99-110	MK-801	Kang et al., 2017
N-Methyl-1-phenylcyclohexylamine	N-methyl PCA		C13H19N			arylcyclohexylamine	uncompetitive NMDAR antagonist	PCP-site (ion channel)	CNC1(CCCCC1)C1=CC=CC=C1	CNC1(CCCCC1)c1ccccc1		670-1560 (pH 6.9), 3530-4920 (pH 7.6)		Dravid et al., 2007
N-ethyl-1-phenylcyclohexylamine	n-ethyl PCA		C14H21N			arylcyclohexylamine	uncompetitive NMDAR antagonist	PCP-site (ion channel)	CCNC1(CCCCC1)C1=CC=CC=C1	CCNC1(CCCCC1)c1ccccc1		230-366 (pH 6.9), 440-1490 (pH 7.6)		Dravid et al., 2007
1‐phenyl‐N‐propylcyclohexan‐1‐amine	PCPr, N-propyl PCA		C15H23N			arylcyclohexylamine	uncompetitive NMDAR antagonist	PCP-site (ion channel)	CCCNC1(CCCCC1)C1=CC=CC=C1	CCCNC1(CCCCC1)c1ccccc1		352-360 (pH 6.9), 630-1060 (pH 7.6)		Dravid et al., 2007
acridin-9-amine		9-aminoacridine	C13H10N2				uncompetitive NMDAR antagonist	PCP-site (ion channel)	NC1=C2C=CC=CC2=NC2=CC=CC=C12	Nc1c2ccccc2nc2c1cccc2		3870-14,300 (pH 6.9), 7470-7760 (pH 7.6)		Dravid et al., 2007
L-3-Hydroxy-N-methylmorphinan		levorphanol	C17H23NO				uncompetitive NMDAR antagonist	PCP-site (ion channel)	CN1CC[C@]23CCCC[C@H]2[C@H]1CC4=C3C=C(C=C4)O	Oc1ccc2c(c1)[C@]13CCCC[C@H]3[C@@H](C2)N(CC1)C		1064-1580 (pH 6.9), 1220-1770 (pH 7.6)		Dravid et al., 2007
2-amino-N-(1,2-diphenylpropan-2-yl)acetamide		remacemide	C17H20N2O			diphenylethylamine	uncompetitive NMDAR antagonist	PCP-site (ion channel)	NCC(=O)NC(CC1=CC=CC=C1)(C)C1=CC=CC=C1	NCC(=O)NC(c1ccccc1)(Cc1ccccc1)C	27,000 nM Kd	67,000-75,000		Subramaniam et al., 1996
1,2‐diphenylpropan‐2‐amine		des-glycine-remacemide, desglycinyl-remacemide	C15H17N				uncompetitive NMDAR antagonist	PCP-site (ion channel)	CC(N)(CC1=CC=CC=C1)C1=CC=CC=C1	CC(c1ccccc1)(Cc1ccccc1)N	1,000 nM Kd	700-4,000		Subramaniam et al., 1996
4,4'-[pentane-1,5-diylbis(oxy)]dibenzenecarboximidamide		pentamidine	C19H24N4O2				uncompetitive NMDAR antagonist	PCP-site (ion channel)	C(CCCCOC1=CC=C(C=C1)C(N)=N)OC1=CC=C(C=C1)C(N)=N	NC(=N)c1ccc(cc1)OCCCCCOc1ccc(cc1)C(=N)N		885-3030 (pH 6.9), 718-1520 (pH 7.6)		Dravid et al., 2007
1-(3-ethylphenyl)-1-methyl-2-naphthalen-1-yl-guanidine	CNS-1102	aptiganel	C20H21N3		Cerestat	guanidine	uncompetitive NMDAR antagonist	PCP-site (ion channel)	C(C)C=1C=C(C=CC1)N(C(=NC1=CC=CC2=CC=CC=C12)N)C	CCc1cccc(c1)N(C(=Nc1cccc2c1cccc2)N)C	29	27-35 (pH 6.9), 68-130 (pH 7.6)		Hu et al., 1997. Dravid et al., 2007.
1-ethenyl-3,3,5,5-tetramethyl-cyclohexylamine	MRZ 2/759		C12H23N			aminoalkylcyclohexane	uncompetitive NMDAR antagonist	PCP-site (ion channel)	C(=C)C1(CC(CC(C1)(C)C)(C)C)N	C=CC1(N)CC(C)(C)CC(C1)(C)C	1180 nM Ki	1510	MK-801	Gilling et al., 2007
1,3,3,5-tetramethyl-6-azabicyclo[3.2.1]octane	MRZ 2/1010		C11H21N			aminoalkylcyclohexane	uncompetitive NMDAR antagonist	PCP-site (ion channel)	CC12CC(CC(NC1)(C2)C)(C)C	CC1(C)CC2(C)NCC(C1)(C2)C	2590 nM Ki	3060	MK-801	Gilling et al., 2007
8,8,10,10-tetramethyl-1-azaspiro[5.5]undecane	MRZ 2/1013		C14H27N			aminoalkylcyclohexane	uncompetitive NMDAR antagonist	PCP-site (ion channel)	CC1(CC2(CCCCN2)CC(C1)(C)C)C	CC1(C)CC(C)(C)CC2(C1)CCCCN2	3640 nM Ki	2200	MK-801	Gilling et al., 2007
2-aminopropionic acid-1-(4-chlorophenyl)-2-methyl-2-propyl ester		alaproclate	C13H18ClNO2				uncompetitive NMDAR antagonist	PCP-site (ion channel)	ClC1=CC=C(C=C1)CC(C)(C)OC(C(C)N)=O	CC(C(=O)OC(Cc1ccc(cc1)Cl)(C)C)N	500 nM Ki		MK-801	Nicholson & Balster, 2003
(RS)-N,N-Dimethyl-2-[(2-methylphenyl)-phenyl-methoxy]-ethanamine		orphenadrine	C18H23NO		Norflex		uncompetitive NMDAR antagonist	PCP-site (ion channel)	CN(CCOC(C1=CC=CC=C1)C1=C(C=CC=C1)C)C	CN(CCOC(c1ccccc1C)c1ccccc1)C	6000 nM Ki		MK-801	Nicholson & Balster, 2003 (from Kornhuber data)
(4aR,10aS)‐N‐methyl‐1,2,3,4,4a,9,10,10a‐octahydrophenanthren‐4a‐amine	PD 138289		C15H21N				uncompetitive NMDAR antagonist	PCP-site (ion channel)	[H][C@@]12CCCC[C@]1(NC)C1=C(CC2)C=CC=C1	CN[C@]12CCCC[C@H]1CCc1c2cccc1	6.4 nM Ki	7.47	TCP (7.47 val)	Nicholson & Balster, 2003. Bigge et al., 1993.
(4aR)‐N‐methyl‐2,3,4,4a,9,9a‐hexahydro‐1H‐fluoren‐4a‐amine	PD 137889, PD 33352		C14H19N				uncompetitive NMDAR antagonist	PCP-site (ion channel)	CN[C@]12CCCCC1CC1=C2C=CC=C1	CN[C@]12CCCCC1Cc1c2cccc1	8.7 nM Ki	10.1	TCP (10.1 val)	Nicholson & Balster, 2003. Bigge et al., 1993.
(+)-1-methyl-1-phenyl-1,2,3,4-tetrahydroisoquinoline	FR 115427		C16H17N			tetrahydroisoquinoline	uncompetitive NMDAR antagonist	PCP-site (ion channel)	CC1(NCCC2=CC=CC=C12)C1=CC=CC=C1	CC1(NCCc2c1cccc2)c1ccccc1	35 nM Ki			Nicholson & Balster, 2003
8-(2-methoxyphenyl)-1,2,3,4-tetrahydroisoquinoline	8-MPTIQ		C16H17NO			tetrahydroisoquinoline	uncompetitive NMDAR antagonist	PCP-site (ion channel)	COC1=C(C=CC=C1)C=1C=CC=C2CCNCC12	COc1ccccc1c1cccc2c1CNCC2	800 nM Ki	900 nM IC50	TCP (900 val)	Nicholson & Balster, 2003. Gray et al., 1989.
1-(4-methoxyphenyl)-1,2,3,4-tetrahydroisoquinoline	1-MPTIQ		C16H17NO			tetrahydroisoquinoline	uncompetitive NMDAR antagonist	PCP-site (ion channel)	COC1=CC=C(C=C1)C1NCCC2=CC=CC=C12	COc1ccc(cc1)C1NCCc2c1cccc2	2200 nM Ki	2500	TCP (2500 val)	Nicholson & Balster, 2003. Gray et al., 1989.
(±)-2-(2,3-dihydro-1,4-benzodioxin-2-yl)-4,5-dihydro-1H-imidazole		Idazoxan	C11H12N2O2			imidazoline	uncompetitive NMDAR antagonist	PCP-site (ion channel)	C1CN=C(N1)C2COC3=CC=CC=C3O2	C1CN=C(N1)C1COc2c(O1)cccc2	71,700 nM Ki		MK-801	Nicholson & Balster, 2003
2,6-Methano-3-benzazocin-8-ol, 3-(cyclopropylmethyl)-1,2,3,4,5,6-hexahydro-6,11-dimethyl-		cyclazocine	C18H25NO	cis		benzomorphan	uncompetitive NMDAR antagonist	PCP-site (ion channel)	C1(CC1)CN1C2CC3=C(C(CC1)(C2C)C)C=C(C=C3)O	Oc1ccc2c(c1)C1(C)CCN(C(C2)C1C)CC1CC1	90(-), 590(+) nM Ki	69	PCP (69 val)	Lockhart: Distinct neuroprotective profiles..., Domino & Kamenka, 1988.
(±)-1,2,3,4,5,6-hexahydro-6,11-dimethyl-3-(2-propen-1-yl)-2,6-methano-3-benzazocin-8-ol	SKF-10047, NANM	alazocine, N-allylnormetazocine	C17H23NO			benzomorphan	uncompetitive NMDAR antagonist	PCP-site (ion channel)	CC12CCN(C(CC3=C1C=C(C=C3)O)C2C)CC=C	C=CCN1CCC2(C(C1Cc1c2cc(cc1)O)C)C	760(+) nM Ki	108(+) nM IC50, 211(-) nM IC50, 234, 405(+), 821(-), 760(+), 750	TCP (405, 821, 760+ IC50s), PCP (750 val)	Lockhart: Distinct neuroprotective profiles..., Mendelsohn et al., 1984. Domino & Kamenka, 1988. Largent et al., 1986. Gray et al., 1989. Zukin & Zukin, 1979.
		ibogaine	C20H26N2O			indole alkaloid	uncompetitive NMDAR antagonist	PCP-site (ion channel)	CC[C@H]1C[C@@H]2C[C@@H]3[C@H]1N(C2)CCC4=C3NC5=C4C=C(C=C5)OC	CCC1CC2CN3C1C(C2)c1[nH]c2c(c1CC3)cc(cc2)OC	1000 nM Ki			Sershen: The Effect of Ibogaine...
2-(3,3-Dimethylallyl)cyclazocine		pentazocine	C19H27NO		Talwin	benzomorphan	uncompetitive NMDAR antagonist	PCP-site (ion channel)	C[C@H]1[C@H]2CC3=C([C@@]1(CCN2CC=C(C)C)C)C=C(C=C3)O	CC(=CCN1CCC2(C(C1Cc1c2cc(cc1)O)C)C)C	1955(-), 2879(+) nM Ki	2820(+/-)	TCP (2820 IC50)	Lockhart: Distinct neuroprotective profiles..., Largent et al., 1986.
3-amino-2-methyl-1,1-di(phenyl)propan-1-ol	2-MDP		C16H19NO	levo, or (-)		propanolamine	uncompetitive NMDAR antagonist	PCP-site (ion channel)	NCC(C(O)(C1=CC=CC=C1)C1=CC=CC=C1)C	NCC(C(c1ccccc1)(c1ccccc1)O)C		8.0(-), 180(+)	PCP	Kozlowski et al., 1986
(1S,5R,13R,14S,17R)‐14‐methoxy‐4‐methyl‐12‐oxa‐4‐azapentacyclo[9.6.1.0^(1,13).0^(5,17).0(7,18)]octadeca‐7,9,11(18),15‐tetraen‐10‐ol	6-Me-morphine		C18H21NO3				uncompetitive NMDAR antagonist	PCP-site (ion channel)	CO[C@H]1C=C[C@H]2[C@H]3CC4=CC=C(O)C5=C4[C@@]2(CCN3C)[C@H]1O5	CO[C@H]1C=C[C@@H]2[C@@]34[C@H]1Oc1c4c(C[C@H]2N(CC3)C)ccc1O	20,000 nM Ki		MK-801	Ebert et al., 1998
		noscapine	C22H23NO7				uncompetitive NMDAR antagonist	PCP-site (ion channel)	CN1CCC2=CC3=C(C(=C2[C@@H]1[C@@H]4C5=C(C(=C(C=C5)OC)OC)C(=O)O4)OC)OCO3	COc1ccc2c(c1OC)C(=O)OC2C1N(C)CCc2c1c(OC)c1c(c2)OCO1	7200 nM Ki		MK-801	Ebert et al., 1998
1-[4-(3-hydroxyphenyl)-1-methylpiperidin-4-yl]propan-1-one		ketobemidone	C15H21NO2				uncompetitive NMDAR antagonist	PCP-site (ion channel)	OC=1C=C(C=CC1)C1(CCN(CC1)C)C(CC)=O	CCC(=O)C1(CCN(CC1)C)c1cccc(c1)O	26,000 nM Ki		MK-801	Ebert et al., 1998
6-(dimethylamino)-4,4-diphenylheptan-3-one		methadone	C21H27NO		Dolophine		uncompetitive NMDAR antagonist	PCP-site (ion channel)	CN(C(CC(C(CC)=O)(C1=CC=CC=C1)C1=CC=CC=C1)C)C	CCC(=O)C(c1ccccc1)(c1ccccc1)CC(N(C)C)C	850 nM Ki		MK-801	Ebert et al., 1998
(2S,3R)‐4‐(dimethylamino)‐3‐methyl‐1,2‐diphenylbutan‐2‐yl propanoate		dextropropoxyphene	C22H29NO2				uncompetitive NMDAR antagonist	PCP-site (ion channel)	CCC(=O)O[C@@](CC1=CC=CC=C1)([C@H](C)CN(C)C)C1=CC=CC=C1	CCC(=O)O[C@](c1ccccc1)([C@@H](CN(C)C)C)Cc1ccccc1	5000 nM Ki		MK-801	Ebert et al., 1998
(4,4‐diphenylbut‐3‐en‐2‐yl)dimethylamine	A29		C18H21N				uncompetitive NMDAR antagonist	PCP-site (ion channel)	CC(C=C(C1=CC=CC=C1)C1=CC=CC=C1)N(C)C	CC(N(C)C)C=C(c1ccccc1)c1ccccc1	16,000 nM Ki		MK-801	Ebert et al., 1998
ethyl 1-methyl-4-phenylpiperidine-4-carboxylate		pethidine	C15H21NO2		Demerol		uncompetitive NMDAR antagonist	PCP-site (ion channel)	CN1CCC(CC1)(C(=O)OCC)C1=CC=CC=C1	CCOC(=O)C1(CCN(CC1)C)c1ccccc1	47,000 nM Ki		MK-801	Ebert et al., 1998
6,7,8,14-Tetradehydro-4,5a-epoxy-3,6-dimethoxy-17-methylmorphinan		thebaine, paramorphine	C19H21NO3				uncompetitive NMDAR antagonist	PCP-site (ion channel)	CN1CC[C@]23[C@@H]4C(=CC=C2[C@H]1CC5=C3C(=C(C=C5)OC)O4)OC	COC1=CC=C2C34C1Oc1c4c(CC2N(CC3)C)ccc1OC	67,000 nM Ki		MK-801	Ebert et al., 1998
2-(ethylamino)-2-thiophen-2-ylcyclohexan-1-one		tiletamine	C12H17NOS		Telazol		uncompetitive NMDAR antagonist	PCP-site (ion channel)	C(C)NC1(C(CCCC1)=O)C=1SC=CC1	CCNC1(CCCCC1=O)c1cccs1		9.4	PCP	Kozlowski et al., 1986
3-Hydroxy-N-cyclopropylmethylmorphinan		cyclorphan	C20H27NO	(-)		morphinan	uncompetitive NMDAR antagonist	PCP-site (ion channel)	C1CC[C@@]23CCN([C@@H]([C@@H]2C1)CC4=C3C=C(C=C4)O)CC5CC5	Oc1ccc2c(c1)C13CCCCC3C(C2)N(CC1)CC1CC1		208 nM IC50	PCP	Mendelsohn et al., 1984
6-ethyl- 3-[(1-hydroxycyclopropyl)methyl]- 11,11-dimethyl- 1,2,3,4,5,6-hexahydro- 2,6-methano- 3-benzazocin-8- ol		bremazocine	C20H29NO2			benzomorphan	uncompetitive NMDAR antagonist	PCP-site (ion channel)	C(C)C12CCN(C(CC3=C1C=C(C=C3)O)C2(C)C)CC2(CC2)O	CCC12CCN(C(C2(C)C)Cc2c1cc(O)cc2)CC1(O)CC1		370	PCP	Mendelsohn et al., 1984
10b‐methyl‐3‐(prop‐2‐en‐1‐yl)‐1H,2H,3H,4H,4aH,5H,6H,10bH‐benzo[f]isoquinolin‐9‐ol	LY156370		C17H23NO			benz(f)isoquinoline	uncompetitive NMDAR antagonist	PCP-site (ion channel)	CC12CCN(CC=C)CC1CCC1=CC=C(O)C=C21	C=CCN1CCC2(C(C1)CCc1c2cc(O)cc1)C		123	PCP	Mendelsohn et al., 1984
3‐cyclopropyl‐10b‐methyl‐1H,2H,3H,4H,4aH,5H,6H,10bH‐benzo[f]isoquinolin‐9‐ol	LY156007		C17H23NO			benz(f)isoquinoline	uncompetitive NMDAR antagonist	PCP-site (ion channel)	CC12CCN(CC1CCC1=C2C=C(O)C=C1)C1CC1	Oc1ccc2c(c1)C1(C)CCN(CC1CC2)C1CC1		353	PCP	Mendelsohn et al., 1984
10b‐methyl‐3‐(prop‐2‐en‐1‐yl)‐1H,2,3H,4H,4aH,5H,6H,10bH‐benzo[f]isoquinolin‐7‐ol	LY163773		C17H23NO			benz(f)isoquinoline	uncompetitive NMDAR antagonist	PCP-site (ion channel)	CC12CCN(CC=C)CC1CCC1=C(O)C=CC=C21	C=CCN1CCC2(C(C1)CCc1c2cccc1O)C		232	PCP	Mendelsohn et al., 1984
	LY154045		C20H27NO				uncompetitive NMDAR antagonist	PCP-site (ion channel)	OC1=CC=C2CCC34CCCC3(CCN(CC3CC3)C4)C2=C1	Oc1ccc2c(c1)C13CCCC3(CC2)CN(CC1)CC1CC1		37	PCP	Mendelsohn et al., 1984
4,5,6,7-Tetrahydroisoxazolo(5,4-c)pyridin-3-ol	THIP		C6H8N2O2			oxazole	uncompetitive NMDAR antagonist	PCP-site (ion channel)	C1CNCC2=C1C(=O)NO2	O=c1[nH]oc2c1CCNC2		57000	PCP	Mendelsohn et al., 1984
1‐(adamantan‐1‐yl)methanamine	MRZ 2/16		C11H19N			aminoadamantane	uncompetitive NMDAR antagonist	PCP-site (ion channel)	NCC12CC3CC(CC(C3)C1)C2	NCC12CC3CC(C2)CC(C1)C3	33300 nM Ki			Tikhonova et al., 2004
3‐(adamantan‐1‐yl)propan‐1‐amine	MRZ 2/23		C13H23N			aminoadamantane	uncompetitive NMDAR antagonist	PCP-site (ion channel)	NCCCC12CC3CC(CC(C3)C1)C2	NCCCC12CC3CC(C2)CC(C1)C3	9500 nM Ki			Tikhonova et al., 2004
4-(adamantan-1-yl)butan-1-amine	MRZ 2/24		C14H25N			aminoadamantane	uncompetitive NMDAR antagonist	PCP-site (ion channel)	NCCCCC12CC3CC(CC(C3)C1)C2	NCCCCC12CC3CC(C2)CC(C1)C3	17,400 nM Ki			Tikhonova et al., 2004
2‐(3,5‐dimethyladamantan‐1‐yl)ethan‐1‐amine	MRZ 2/138		C14H25N			aminoadamantane	uncompetitive NMDAR antagonist	PCP-site (ion channel)	CC12CC3CC(C)(C1)CC(CCN)(C3)C2	NCCC12CC3CC(C2)(CC(C1)(C3)C)C	790 nM Ki, 240-580 nM Ki	3400-5200		Tikhonova et al., 2004. Parsons et al., 1995.
3,5‐diethyladamantan‐1‐amine	MRZ 2/150		C14H25N			aminoadamantane	uncompetitive NMDAR antagonist	PCP-site (ion channel)	CCC12CC3CC(N)(C1)CC(CC)(C3)C2	CCC12CC3CC(C1)(CC)CC(C2)(C3)N	190 nM Ki, 230-410 nM Ki	2800-3200		Tikhonova et al., 2004. Parsons et al., 1995.
N,3,5‐trimethyladamantan‐1‐amine	MRZ 2/170		C13H23N			aminoadamantane	uncompetitive NMDAR antagonist	PCP-site (ion channel)	CNC12CC3CC(C)(CC(C)(C3)C1)C2	CNC12CC3CC(C2)(CC(C1)(C3)C)C	4440 nM Ki, 1810-2210 nM Ki	27,000-29,800		Tikhonova et al., 2004. Parsons et al., 1995.
N,N,3,5‐tetramethyladamantan‐1‐amine	MRZ 2/171		C14H25N			aminoadamantane	uncompetitive NMDAR antagonist	PCP-site (ion channel)	CN(C)C12CC3CC(C)(CC(C)(C3)C1)C2	CN(C12CC3CC(C2)(CC(C1)(C3)C)C)C	1720 nM Ki			Tikhonova et al., 2004
[2‐(adamantan‐1‐yl)ethyl](ethyl)amine	MRZ 2/174		C14H25N			aminoadamantane	uncompetitive NMDAR antagonist	PCP-site (ion channel)	CCNCCC12CC3CC(CC(C3)C1)C2	CCNCCC12CC3CC(C2)CC(C1)C3	3800 nM Ki, 470-510 nM Ki	6800-9200		Tikhonova et al., 2004. Parsons et al., 1995.
3-ethyladamantan-1-amine	MRZ 2/175		C12H21N			aminoadamantane	uncompetitive NMDAR antagonist	PCP-site (ion channel)	CCC12CC3CC(CC(N)(C3)C1)C2	CCC12CC3CC(C1)CC(C2)(C3)N	600 nM Ki			Tikhonova et al., 2004
3‐(propan‐2‐yl)adamantan‐1‐amine	MRZ 2/177		C13H23N			aminoadamantane	uncompetitive NMDAR antagonist	PCP-site (ion channel)	CC(C)C12CC3CC(CC(N)(C3)C1)C2	CC(C12CC3CC(C1)CC(C2)(C3)N)C	7200 nM Ki, 530-890 nM Ki	4000-4400		Tikhonova et al., 2004. Parsons et al., 1995.
3-phenyladamantan-1-amine	MRZ 2/180		C16H21N			aminoadamantane	uncompetitive NMDAR antagonist	PCP-site (ion channel)	NC12CC3CC(C1)CC(C3)(C2)C1=CC=CC=C1	NC12CC3CC(C1)CC(C2)(C3)c1ccccc1	15200 nM Ki			Tikhonova et al., 2004
3-ethyl-5-phenyladamantan-1-amine	MRZ 2/184		C18H25N			aminoadamantane	uncompetitive NMDAR antagonist	PCP-site (ion channel)	CCC12CC3CC(N)(C1)CC(C3)(C2)C1=CC=CC=C1	CCC12CC3CC(C1)(N)CC(C2)(C3)c1ccccc1	4080 nM Ki			Tikhonova et al., 2004
N,N-dimethyladamantan-1-amine	MRZ 2/187		C12H21N			aminoadamantane	uncompetitive NMDAR antagonist	PCP-site (ion channel)	CN(C)C12CC3CC(CC(C3)C1)C2	CN(C12CC3CC(C2)CC(C1)C3)C	20800 nM Ki			Tikhonova et al., 2004
N-methyladamantan-1-amine	MRZ 2/188		C11H19N			aminoadamantane	uncompetitive NMDAR antagonist	PCP-site (ion channel)	CNC12CC3CC(CC(C3)C1)C2	CNC12CC3CC(C2)CC(C1)C3	21700 nM Ki			Tikhonova et al., 2004
1-phenylcyclohexan-1-amine	PCA		C12H17N			arylcyclohexylamine	uncompetitive NMDAR antagonist	PCP-site (ion channel)	NC1(CCCCC1)C1=CC=CC=C1	NC1(CCCCC1)c1ccccc1	527, 599.2	940.7, 1000, 484	TCP (527 val), MK-801	Thurkauf et al., 1990. Wallach, 2014. Stefek et al., 1990. Kozikowski & Pang, 1990.
N-methyl-1-phenylcyclohexan-1-amine			C13H19N			arylcyclohexylamine	uncompetitive NMDAR antagonist	PCP-site (ion channel)	CNC1(CCCCC1)C1=CC=CC=C1	CNC1(CCCCC1)c1ccccc1	347 nM Ki	357	TCP (Ki), PCP (IC50 val)	Thurkauf et al., 1990. Domino & Kamenka, 1988.
N,N-dimethyl-1-phenylcyclohexan-1-amine	PCDEA		C14H21N			arylcyclohexylamine	uncompetitive NMDAR antagonist	PCP-site (ion channel)	CN(C)C1(CCCCC1)C1=CC=CC=C1	CN(C1(CCCCC1)c1ccccc1)C	722 nM Ki	510	TCP, PCP (510 val)	Thurkauf et al., 1990. Zukin & Zukin, 1979.
(1R,2S)-2-methyl-1-phenylcyclohexan-1-amine			C13H19N	(+/-)		arylcyclohexylamine	uncompetitive NMDAR antagonist	PCP-site (ion channel)	CC1CCCCC1(N)C1=CC=CC=C1	C[C@H]1CCCC[C@]1(N)c1ccccc1	2000 nM Ki		TCP	Thurkauf et al., 1990
(1R,2R)-2-methyl-1-phenylcyclohexan-1-amine			C13H19N	(+/-)		arylcyclohexylamine	uncompetitive NMDAR antagonist	PCP-site (ion channel)	CC1CCCCC1(N)C1=CC=CC=C2	C[C@@H]1CCCC[C@]1(N)c1ccccc1	1600 nM Ki		TCP	Thurkauf et al., 1990
(1R,3S)-3-methyl-1-phenylcyclohexan-1-amine			C13H19N			arylcyclohexylamine	uncompetitive NMDAR antagonist	PCP-site (ion channel)	CC1CCCC(N)(C1)C1=CC=CC=C1	C[C@H]1CCC[C@](C1)(N)c1ccccc1	502 nM Ki		TCP	Thurkauf et al., 1990
(1S,3R)‐3‐methyl‐1‐phenylcyclohexan‐1‐amine			C13H19N			arylcyclohexylamine	uncompetitive NMDAR antagonist	PCP-site (ion channel)	CC1CCCC(N)(C1)C1=CC=CC=C2	C[C@@H]1CCC[C@@](C1)(N)c1ccccc1	8000 nM Ki		TCP	Thurkauf et al., 1990
(1R,3R)‐3‐methyl‐1‐phenylcyclohexan‐1‐amine			C13H19N			arylcyclohexylamine	uncompetitive NMDAR antagonist	PCP-site (ion channel)	CC1CCCC(N)(C1)C1=CC=CC=C1	C[C@@H]1CCC[C@](C1)(N)c1ccccc1	1200 nM Ki		TCP	Thurkauf et al., 1990
(1S,3S)‐3‐methyl‐1‐phenylcyclohexan‐1‐amine			C13H19N			arylcyclohexylamine	uncompetitive NMDAR antagonist	PCP-site (ion channel)	CC1CCCC(N)(C1)C1=CC=CC=C2	C[C@H]1CCC[C@@](C1)(N)c1ccccc1	1640 nM Ki		TCP	Thurkauf et al., 1990
(1s,4s)‐4‐methyl‐1‐phenylcyclohexan‐1‐amine			C13H19N			arylcyclohexylamine	uncompetitive NMDAR antagonist	PCP-site (ion channel)	CC1CCC(N)(CC1)C1=CC=CC=C1	C[C@@H]1CC[C@@](CC1)(N)c1ccccc1	1100 nM Ki		TCP	Thurkauf et al., 1990
(1r,4r)‐4‐methyl‐1‐phenylcyclohexan‐1‐amine			C13H19N			arylcyclohexylamine	uncompetitive NMDAR antagonist	PCP-site (ion channel)	CC1CCC(N)(CC1)C1=CC=CC=C2	C[C@@H]1CC[C@](CC1)(N)c1ccccc1	8400 nM Ki		TCP	Thurkauf et al., 1990
1-(2-methyl-1-phenyl)cyclohexan-1-amine			C13H19N			arylcyclohexylamine	uncompetitive NMDAR antagonist	PCP-site (ion channel)	CC1=CC=CC=C1C1(N)CCCCC1	Cc1ccccc1C1(N)CCCCC1	7800 nM Ki		TCP	Thurkauf et al., 1990
1-(3-methylphenyl)cyclohexan-1-amine			C13H19N			arylcyclohexylamine	uncompetitive NMDAR antagonist	PCP-site (ion channel)	CC1=CC(=CC=C1)C1(N)CCCCC1	Cc1cccc(c1)C1(N)CCCCC1	592 nM Ki		TCP	Thurkauf et al., 1990
1-(4-methylphenyl)cyclohexan-1-amine			C13H19N			arylcyclohexylamine	uncompetitive NMDAR antagonist	PCP-site (ion channel)	CC1=CC=C(C=C1)C1(N)CCCCC1	NC1(CCCCC1)c1ccc(cc1)C	7300 nM Ki		TCP	Thurkauf et al., 1990
1-(1-phenylcyclohexyl)methanamine			C13H19N			arylcyclohexylamine	uncompetitive NMDAR antagonist	PCP-site (ion channel)	NCC1(CCCCC1)C1=CC=CC=C1	NCC1(CCCCC1)c1ccccc1	5100 nM Ki		TCP	Thurkauf et al., 1990
1-benzylcyclohexan-1-amine			C13H19N			arylcyclohexylamine	uncompetitive NMDAR antagonist	PCP-site (ion channel)	NC1(CC2=CC=CC=C2)CCCCC1	NC1(CCCCC1)Cc1ccccc1	16,000 nM Ki		TCP	Thurkauf et al., 1990
1‐(2‐methoxyphenyl)cyclohexan‐1‐amine			C13H19NO			arylcyclohexylamine	uncompetitive NMDAR antagonist	PCP-site (ion channel)	COC1=CC=CC=C1C1(N)CCCCC1	COc1ccccc1C1(N)CCCCC1	850 nM Ki		TCP	Thurkauf et al., 1990
1‐(3‐methoxyphenyl)cyclohexan‐1‐amine			C13H19NO			arylcyclohexylamine	uncompetitive NMDAR antagonist	PCP-site (ion channel)	COC1=CC(=CC=C1)C1(N)CCCCC1	COc1cccc(c1)C1(N)CCCCC1	563 nM Ki		TCP	Thurkauf et al., 1990
1‐[2‐(methylsulfanyl)phenyl]cyclohexan‐1‐amine			C13H19NS			arylcyclohexylamine	uncompetitive NMDAR antagonist	PCP-site (ion channel)	CSC1=CC=CC=C1C1(N)CCCCC1	CSc1ccccc1C1(N)CCCCC1	820 nM Ki		TCP	Thurkauf et al., 1990
1‐[3‐(methylsulfanyl)phenyl]cyclohexan‐1‐amine			C13H19NS			arylcyclohexylamine	uncompetitive NMDAR antagonist	PCP-site (ion channel)	CSC1=CC=CC(=C1)C1(N)CCCCC1	CSc1cccc(c1)C1(N)CCCCC1	2420 nM Ki		TCP	Thurkauf et al., 1990
1‐(2‐fluorophenyl)cyclohexan‐1‐amine			C12H16FN			arylcyclohexylamine	uncompetitive NMDAR antagonist	PCP-site (ion channel)	NC1(CCCCC1)C1=CC=CC=C1F	Fc1ccccc1C1(N)CCCCC1	10,700 nM Ki		TCP	Thurkauf et al., 1990
1‐(3‐fluorophenyl)cyclohexan‐1‐amine			C12H16FN			arylcyclohexylamine	uncompetitive NMDAR antagonist	PCP-site (ion channel)	NC1(CCCCC1)C1=CC=CC(F)=C1	Fc1cccc(c1)C1(N)CCCCC1	675 nM Ki		TCP	Thurkauf et al., 1990
1‐(4‐fluorophenyl)cyclohexan‐1‐amine			C12H16FN			arylcyclohexylamine	uncompetitive NMDAR antagonist	PCP-site (ion channel)	NC1(CCCCC1)C1=CC=C(F)C=C1	NC1(CCCCC1)c1ccc(cc1)F	923 nM Ki		TCP	Thurkauf et al., 1990
1‐[2‐(trifluoromethyl)phenyl]cyclohexan‐1‐amine			C13H16F3N			arylcyclohexylamine	uncompetitive NMDAR antagonist	PCP-site (ion channel)	NC1(CCCCC1)C1=CC=CC=C1C(F)(F)F	NC1(CCCCC1)c1ccccc1C(F)(F)F	12,400 nM Ki		TCP	Thurkauf et al., 1990
1‐[3‐(trifluoromethyl)phenyl]cyclohexan‐1‐amine			C13H16F3N			arylcyclohexylamine	uncompetitive NMDAR antagonist	PCP-site (ion channel)	NC1(CCCCC1)C1=CC=CC(=C1)C(F)(F)F	NC1(CCCCC1)c1cccc(c1)C(F)(F)F	8400 nM Ki		TCP	Thurkauf et al., 1990
3-(1-aminocyclohexyl)phenol			C12H17NO			arylcyclohexylamine	uncompetitive NMDAR antagonist	PCP-site (ion channel)	NC1(CCCCC1)C1=CC=CC(O)=C1	Oc1cccc(c1)C1(N)CCCCC1	222 nM Ki		TCP	Thurkauf et al., 1990
1‐(phenanthren‐9‐yl)cyclohexan‐1‐amine			C20H21N			arylcyclohexylamine	uncompetitive NMDAR antagonist	PCP-site (ion channel)	NC1(CCCCC1)C1=CC2=C(C=CC=C2)C2=C1C=CC=C2	NC1(CCCCC1)c1cc2ccccc2c2c1cccc2	27,500 nM Ki		TCP	Thurkauf et al., 1990
1‐(2,3,4,5,6‐pentafluorophenyl)cyclohexan‐1‐amine			C12H12F5N			arylcyclohexylamine	uncompetitive NMDAR antagonist	PCP-site (ion channel)	NC1(CCCCC1)C1=C(F)C(F)=C(F)C(F)=C1F	NC1(CCCCC1)c1c(F)c(F)c(c(c1F)F)F	10,000 nM Ki		TCP	Thurkauf et al., 1990
1‐(thiophen‐2‐yl)cyclohexan‐1‐amine			C10H15NS				uncompetitive NMDAR antagonist	PCP-site (ion channel)	NC1(CCCCC1)C1=CC=CS1	NC1(CCCCC1)c1cccs1	145 nM Ki		TCP	Thurkauf et al., 1990
1-phenylcyclopentan-1-amine			C11H15N				uncompetitive NMDAR antagonist	PCP-site (ion channel)	NC1(CCCC1)C1=CC=CC=C1	NC1(CCCC1)c1ccccc1	10,500 nM Ki		TCP	Thurkauf et al., 1990
1‐[4‐(methylsulfanyl)phenyl]cyclohexan‐1‐amine			C13H19NS			arylcyclohexylamine	uncompetitive NMDAR antagonist	PCP-site (ion channel)	CSC1=CC=C(C=C1)C1(N)CCCCC1	CSc1ccc(cc1)C1(N)CCCCC1	43,000 nM Ki		TCP	Thurkauf et al., 1990
1‐(naphthalen‐2‐yl)cyclohexan‐1‐amine			C16H19N			arylcyclohexylamine	uncompetitive NMDAR antagonist	PCP-site (ion channel)	NC1(CCCCC1)C1=CC2=CC=CC=C2C=C1	NC1(CCCCC1)c1ccc2c(c1)cccc2	34,000 nM Ki		TCP	Thurkauf et al., 1990
1‐{[1,1'‐biphenyl]‐4‐yl}cyclohexan‐1‐amine			C18H21N				uncompetitive NMDAR antagonist	PCP-site (ion channel)	NC1(CCCCC1)C1=CC=C(C=C1)C1=CC=CC=C1	NC1(CCCCC1)c1ccc(cc1)c1ccccc1	86,000 nM Ki		TCP	Thurkauf et al., 1990
1-phenylcycloheptan-1-amine	PCHEA		C13H19N			arylcycloheptylamine	uncompetitive NMDAR antagonist	PCP-site (ion channel)	NC1(CCCCCC1)C1=CC=CC=C1	NC1(CCCCCC1)c1ccccc1	2600, 3490 nM Ki	5470	MK-801(3490,5470 vals), TCP	Thurkauf et al., 1990. Wallach, 2014 (from Sun data).
tricyclo[9.4.0.0^(3,8)]pentadeca‐1(11),3(8),4,6,12,14‐hexaen‐2‐aminium	IEM-2115		C15H16[N+]				uncompetitive NMDAR antagonist	PCP-site (ion channel)	[NH3+]C1C2=C(CCC3=C1C=CC=C3)C=CC=C2	[NH3+]C1c2ccccc2CCc2c1cccc2		3000		Barygin et al., 2009
2‐(3‐methyladamantan‐1‐yl)ethan‐1‐amine	MRZ 2/15		C13H23N			adamantine, aminoadamantane	uncompetitive NMDAR antagonist	PCP-site (ion channel)	CC12CC3CC(C1)CC(CCN)(C3)C2	NCCC12CC3CC(C1)CC(C2)(C3)C	1960 nM Ki	6900	MK-801	Parsons et al., 1995
3‐ethyl‐5,7‐methyladamantan‐1‐amine	MRZ 2/151		C14H25N			adamantine, aminoadamantane	uncompetitive NMDAR antagonist	PCP-site (ion channel)	CCC12CC3(C)CC(C)(CC(N)(C3)C1)C2	CCC12CC3(C)CC(C1)(C)CC(C2)(C3)N	890 nM Ki	6900	MK-801	Parsons et al., 1995
2‐(3‐bromoadamantan‐1‐yl)ethan‐1‐amine	MRZ 2/153		C12H20BrN			adamantine, aminoadamantane	uncompetitive NMDAR antagonist	PCP-site (ion channel)	NCCC12CC3CC(CC(Br)(C3)C1)C2	NCCC12CC3CC(C1)CC(C2)(C3)Br	1000 nM Ki	6200	MK-801	Parsons et al., 1995
N,3,5‐trimethyladamantan‐1‐amine	MRZ 2/169		C13H23N			adamantine, aminoadamantane	uncompetitive NMDAR antagonist	PCP-site (ion channel)	CNC12CC3CC(C)(CC(C)(C3)C1)C2	CNC12CC3CC(C2)(CC(C1)(C3)C)C	1340 nM Ki	4400	MK-801	Parsons et al., 1995
pentacyclo[7.3.1.1^(4,12).0^(2,7).0^(6,11)]tetradecan‐1‐aminium	MRZ 2/335		C14H22[N+]				uncompetitive NMDAR antagonist	PCP-site (ion channel)	[NH3+]C12CC3CC4C5CC(CC14)CC2C5C3	[NH3+]C12CC3CC4C2CC2CC1C(C3)C4C2	2170 nM Ki	9600	MK-801	Parsons et al., 1995
3,5‐bis(propan‐2‐yl)adamantan‐1‐amine	MRZ 2/372		C16H29N			adamantine, aminoadamantane	uncompetitive NMDAR antagonist	PCP-site (ion channel)	CC(C)C12CC3CC(N)(C1)CC(C3)(C2)C(C)C	CC(C12CC3CC(C1)(N)CC(C2)(C3)C(C)C)C	890 nM Ki	7300	MK-801	Parsons et al., 1995
1‐(3,5‐dimethyladamantan‐1‐yl)methanamine	MRZ 2/406		C13H23N			adamantine, aminoadamantane	uncompetitive NMDAR antagonist	PCP-site (ion channel)	CC12CC3CC(C)(C1)CC(CN)(C3)C2	NCC12CC3CC(C2)(CC(C1)(C3)C)C	3880 nM Ki	14000	MK-801	Parsons et al., 1995
4‐(3,5‐dimethyladamantan‐1‐yl)butan‐1‐amine	MRZ 2/427		C16H29N			adamantine, aminoadamantane	uncompetitive NMDAR antagonist	PCP-site (ion channel)	CC12CC3CC(C)(C1)CC(CCCCN)(C3)C2	NCCCCC12CC3CC(C2)(CC(C1)(C3)C)C	3040 nM Ki	1500	MK-801	Parsons et al., 1995
3‐ethyl‐5‐methyladamantan‐1‐amine	MRZ 2/457		C13H23N			adamantine, aminoadamantane	uncompetitive NMDAR antagonist	PCP-site (ion channel)	CCC12CC3CC(C)(CC(N)(C3)C1)C2	CCC12CC3CC(C1)(C)CC(C2)(C3)N	600 nM Ki	3100	MK-801	Parsons et al., 1995
N-benzyl-N-(4,5-dihydro-1H-imidazol-2-ylmethyl)aniline		antazoline	C17H19N3				uncompetitive NMDAR antagonist	PCP-site (ion channel)	C1CN=C(N1)CN(CC2=CC=CC=C2)C3=CC=CC=C3	c1ccc(cc1)CN(c1ccccc1)CC1=NCCN1	7600 nM Ki	31500	MK-801 (IC50 val)	Nicholson & Balster, 2003. Olmos et al., 1996.
(2S)-2‐amino‐2‐(2‐chlorophenyl)cyclohexan‐1‐one			C12H14ClNO	S			uncompetitive NMDAR antagonist	PCP-site (ion channel)	NC1(CCCCC1=O)C1=CC=CC=C1Cl	O=C1CCCC[C@]1(N)c1ccccc1Cl	4320 nM Ki		MK-801	Berger et al., 2009
(1S)-1,2-diphenylethan-1-amine	DPEA		C14H15N	S			uncompetitive NMDAR antagonist	PCP-site (ion channel)	NC(CC1=CC=CC=C1)C1=CC=CC=C1	N[C@H](c1ccccc1)Cc1ccccc1	700 nM Ki		MK-801	Berger et al., 2009
(1R)‐1,2‐diphenylethane‐1,2‐diamine			C14H16N2	R			uncompetitive NMDAR antagonist	PCP-site (ion channel)	NC([C@H](N)C1=CC=CC=C1)C1=CC=CC=C1	NC([C@@H](c1ccccc1)N)c1ccccc1	4120		MK-801	Berger et al., 2009
1‐[(1R)‐1,2‐diphenylethyl]piperidine			C19H23N	R			uncompetitive NMDAR antagonist	PCP-site (ion channel)	C([C@@H](N1CCCCC1)C1=CC=CC=C1)C1=CC=CC=C1	c1ccc(cc1)C[C@H](c1ccccc1)N1CCCCC1	6135		MK-801	Berger et al., 2009
(2R)‐1,2‐diphenylpropan‐2‐amine			C15H17N	R			uncompetitive NMDAR antagonist	PCP-site (ion channel)	C[C@@](N)(CC1=CC=CC=C1)C1=CC=CC=C1	C[C@](c1ccccc1)(Cc1ccccc1)N	8,080 nM Ki		MK-801	Berger et al., 2009
(2S)‐1,2‐diphenylpropan‐2‐amine			C15H17N	S			uncompetitive NMDAR antagonist	PCP-site (ion channel)	C[C@](N)(CC1=CC=CC=C1)C1=CC=CC=C1	C[C@@](c1ccccc1)(Cc1ccccc1)N	790 nM Ki		MK-801	Berger et al., 2009
(2R)‐2‐amino‐1,2‐diphenylethan‐1‐ol			C14H15NO	R			uncompetitive NMDAR antagonist	PCP-site (ion channel)	N[C@@H](C(O)C1=CC=CC=C1)C1=CC=CC=C1	N[C@@H](C(c1ccccc1)O)c1ccccc1	15700		MK-801	Berger et al., 2009
(2R)-2‐amino‐2‐(2‐chlorophenyl)cyclohexan‐1‐one			C12H14ClNO	R			uncompetitive NMDAR antagonist	PCP-site (ion channel)	NC1(CCCCC1=O)C1=CC=CC=C1Cl	O=C1CCCC[C@@]1(N)c1ccccc1Cl	55,000-60,000 nM Ki		MK-801	Berger et al., 2009
(1R)-1,2-diphenylethan-1-amine	DPEA		C14H15N	R			uncompetitive NMDAR antagonist	PCP-site (ion channel)	NC(CC1=CC=CC=C1)C1=CC=CC=C1	N[C@@H](c1ccccc1)Cc1ccccc1	25100		MK-801	Berger et al., 2009
(1S)‐1,2‐diphenylethane‐1,2‐diamine			C14H16N2	S			uncompetitive NMDAR antagonist	PCP-site (ion channel)	NC([C@@H](N)C1=CC=CC=C1)C1=CC=CC=C1	NC([C@H](c1ccccc1)N)c1ccccc1	51000		MK-801	Berger et al., 2009
(1R)‐1‐phenyl‐2‐(pyridin‐2‐yl)ethan‐1‐amine			C13H14N2	R			uncompetitive NMDAR antagonist	PCP-site (ion channel)	N[C@H](CC1=CC=CC=N1)C1=CC=CC=C1	N[C@@H](c1ccccc1)Cc1ccccn1	84000		MK-801	Berger et al., 2009
1,1-diphenylmethanamine			C13H13N				uncompetitive NMDAR antagonist	PCP-site (ion channel)	NC(C1=CC=CC=C1)C1=CC=CC=C1	NC(c1ccccc1)c1ccccc1	64000		MK-801	Berger et al., 2009
(2S)‐2‐[(4S)‐2‐methyl‐2‐phenyl‐1,3‐dioxolan‐4‐yl]piperidine			C15H21NO2			dioxolane	uncompetitive NMDAR antagonist	PCP-site (ion channel)	CC1(OC[C@@H](O1)[C@@H]1CCCCN1)C1=CC=CC=C1	CC1(OC[C@@H](O1)[C@@H]1CCCCN1)c1ccccc1	847 nM Ki		TCP	Sax & Wünsch, 2006
(2S)‐2‐[(4S)‐2‐phenyl‐2‐propyl‐1,3‐dioxolan‐4‐yl]piperidine			C17H25NO2			dioxolane	uncompetitive NMDAR antagonist	PCP-site (ion channel)	CCCC1(OC[C@@H](O1)[C@@H]1CCCCN1)C1=CC=CC=C1	CCCC1(OC[C@@H](O1)[C@@H]1CCCCN1)c1ccccc1	69 nM Ki		TCP	Sax & Wünsch, 2006
(2S)‐2‐[(4S)‐2‐phenyl‐2‐(propan‐2‐yl)‐1,3‐dioxolan‐4‐yl]piperidine			C17H25NO3			dioxolane	uncompetitive NMDAR antagonist	PCP-site (ion channel)	CC(C)C1(OC[C@@H](O1)[C@@H]1CCCCN1)C1=CC=CC=C1	CC(C1(OC[C@@H](O1)[C@@H]1CCCCN1)c1ccccc1)C	45 nM Ki		TCP	Sax & Wünsch, 2006
(2S)‐2‐[(4S)‐2‐butyl‐2‐phenyl‐1,3‐dioxolan‐4‐yl]piperidine			C18H27NO2			dioxolane	uncompetitive NMDAR antagonist	PCP-site (ion channel)	CCCCC1(OC[C@@H](O1)[C@@H]1CCCCN1)C1=CC=CC=C1	CCCCC1(OC[C@@H](O1)[C@@H]1CCCCN1)c1ccccc1	200 nM Ki		TCP	Sax & Wünsch, 2006
(2S)‐2‐[(2S,4S)‐2‐(2‐chlorophenyl)‐2‐ethyl‐1,3‐dioxolan‐4‐yl]piperidine			C16H22ClNO2			dioxolane	uncompetitive NMDAR antagonist	PCP-site (ion channel)	CC[C@@]1(OC[C@@H](O1)[C@@H]1CCCCN1)C1=CC=CC=C1Cl	CC[C@@]1(OC[C@@H](O1)[C@@H]1CCCCN1)c1ccccc1Cl	14.3 nM Ki		TCP	Sax & Wünsch, 2006
(2S)‐2‐[(2S,4S)‐2‐(3‐chlorophenyl)‐2‐ethyl‐1,3‐dioxolan‐4‐yl]piperidine			C16H22ClNO2			dioxolane	uncompetitive NMDAR antagonist	PCP-site (ion channel)	CC[C@@]1(OC[C@@H](O1)[C@@H]1CCCCN1)C1=CC=CC(Cl)=C1	CC[C@@]1(OC[C@@H](O1)[C@@H]1CCCCN1)c1cccc(c1)Cl	59 nM Ki		TCP	Sax & Wünsch, 2006
(2S)‐2‐[(2S,4S)‐2‐(4‐chlorophenyl)‐2‐ethyl‐1,3‐dioxolan‐4‐yl]piperidine			C16H22ClNO2			dioxolane	uncompetitive NMDAR antagonist	PCP-site (ion channel)	CC[C@@]1(OC[C@@H](O1)[C@@H]1CCCCN1)C1=CC=C(Cl)C=C1	CC[C@@]1(OC[C@@H](O1)[C@@H]1CCCCN1)c1ccc(cc1)Cl	2800 nM Ki		TCP	Sax & Wünsch, 2006
(2S)‐2‐[(2S,4S)‐2‐(4‐flurophenyl)‐2‐ethyl‐1,3‐dioxolan‐4‐yl]piperidine			C16H22FNO2			dioxolane	uncompetitive NMDAR antagonist	PCP-site (ion channel)	CC[C@@]1(OC[C@@H](O1)[C@@H]1CCCCN1)C1=CC=C(F)C=C1	CC[C@@]1(OC[C@@H](O1)[C@@H]1CCCCN1)c1ccc(cc1)F	649 nM Ki		TCP	Sax & Wünsch, 2006
(2S)‐2‐[(2S,4S)‐2‐(2‐fluorophenyl)‐2‐ethyl‐1,3‐dioxolan‐4‐yl]piperidine			C16H22FNO2			dioxolane	uncompetitive NMDAR antagonist	PCP-site (ion channel)	CC[C@@]1(OC[C@@H](O1)[C@@H]1CCCCN1)C1=CC=CC=C1F	CC[C@@]1(OC[C@@H](O1)[C@@H]1CCCCN1)c1ccccc1F	36 nM Ki		TCP	Sax & Wünsch, 2006
2‐[(2S,4S)‐2‐ethyl‐4‐[(2S)‐piperidin‐2‐yl]‐1,3‐dioxolan‐2‐yl]phenol			C16H23NO3			dioxolane	uncompetitive NMDAR antagonist	PCP-site (ion channel)	CC[C@@]1(OC[C@@H](O1)[C@@H]1CCCCN1)C1=CC=CC=C1O	CC[C@@]1(OC[C@@H](O1)[C@@H]1CCCCN1)c1ccccc1O	293 nM Ki		TCP	Sax & Wünsch, 2006
3‐[(2S,4S)‐2‐ethyl‐4‐[(2S)‐piperidin‐2‐yl]‐1,3‐dioxolan‐2‐yl]phenol			C16H23NO3			dioxolane	uncompetitive NMDAR antagonist	PCP-site (ion channel)	CC[C@@]1(OC[C@@H](O1)[C@@H]1CCCCN1)C1=CC=CC(O)=C1	CC[C@@]1(OC[C@@H](O1)[C@@H]1CCCCN1)c1cccc(c1)O	489 nM Ki		TCP	Sax & Wünsch, 2006
3‐[(2S,4S)‐2‐ethyl‐4‐[(2S)‐piperidin‐2‐yl]‐1,3‐dioxolan‐2‐yl]aniline			C16H24N2O2			dioxolane	uncompetitive NMDAR antagonist	PCP-site (ion channel)	CC[C@@]1(OC[C@@H](O1)[C@@H]1CCCCN1)C1=CC=CC(N)=C1	CC[C@@]1(OC[C@@H](O1)[C@@H]1CCCCN1)c1cccc(c1)N	1230 nM Ki		TCP	Sax & Wünsch, 2006
(2S)‐2‐[(2S,4S)‐2‐ethyl‐2‐(3‐nitrophenyl)‐1,3‐dioxolan‐4‐yl]piperidine			C16H22N[N+]O3[O-]			dioxolane	uncompetitive NMDAR antagonist	PCP-site (ion channel)	CC[C@@]1(OC[C@@H](O1)[C@@H]1CCCCN1)C1=CC=CC(=C1)[N+]([O-])=O	CC[C@@]1(OC[C@@H](O1)[C@@H]1CCCCN1)c1cccc(c1)[N+](=O)[O-]	1320 nM Ki		TCP	Sax & Wünsch, 2006
(2S)‐2‐[(2S,4S)‐2‐ethyl‐2‐(3‐isothiocyanatophenyl)‐1,3‐dioxolan‐4‐yl]piperidine			C17H22N2O2S			dioxolane	uncompetitive NMDAR antagonist	PCP-site (ion channel)	CC[C@@]1(OC[C@@H](O1)[C@@H]1CCCCN1)C1=CC=CC(=C1)N=C=S	S=C=Nc1cccc(c1)[C@@]1(CC)OC[C@@H](O1)[C@@H]1CCCCN1	590 nM Ki		TCP	Sax & Wünsch, 2006
(2S)‐2‐[(2S,4S)‐2‐ethyl‐2‐(thiophen‐2‐yl)‐1,3‐dioxolan‐4‐yl]piperidine			C14H21NO2S			dioxolane	uncompetitive NMDAR antagonist	PCP-site (ion channel)	CC[C@@]1(OC[C@@H](O1)[C@@H]1CCCCN1)C1=CC=CS1	CC[C@@]1(OC[C@@H](O1)[C@@H]1CCCCN1)c1cccs1	205 nM Ki		TCP	Sax & Wünsch, 2006
(2S)‐2‐[(2S,4S)‐2‐ethyl‐2‐(thiophen‐3‐yl)‐1,3‐dioxolan‐4‐yl]piperidine			C14H21NO2S			dioxolane	uncompetitive NMDAR antagonist	PCP-site (ion channel)	CC[C@@]1(OC[C@@H](O1)[C@@H]1CCCCN1)C1=CSC=C1	CC[C@@]1(OC[C@@H](O1)[C@@H]1CCCCN1)c1cscc1	124 nM Ki		TCP	Sax & Wünsch, 2006
(2S)‐2‐[(4S)‐spiro[1,3‐dioxolane‐2,2'‐tricyclo[9.4.0.0^(3,8)]pentadecane]‐1'(11'),3',5',7',12',14'‐hexaen‐4‐yl]piperidine			C22H25NO2			dioxolane	uncompetitive NMDAR antagonist	PCP-site (ion channel)	C1OC2(O[C@H]1[C@@H]1CCCCN1)C1=CC=CC=C1CCC1=C2C=CC=C1	C1CC[C@H](NC1)[C@H]1COC2(O1)c1ccccc1CCc1c2cccc1	325 nM Ki		TCP	Sax & Wünsch, 2006
(2S)‐2‐[(4S)‐2,2‐diphenyl‐1,3‐dioxolan‐4‐yl]‐1‐methylpiperidine			C21H25NO2			dioxolane	uncompetitive NMDAR antagonist	PCP-site (ion channel)	CN1CCCC[C@H]1[C@H]1COC(O1)(C1=CC=CC=C1)C1=CC=CC=C1	CN1CCCC[C@H]1[C@H]1COC(O1)(c1ccccc1)c1ccccc1	4400 nM Ki		TCP	Sax & Wünsch, 2006
(2S)‐2‐[(4S)‐2,2‐diphenyl‐1,3‐dioxolan‐4‐yl]‐1‐ethylpiperidine			C22H27NO2			dioxolane	uncompetitive NMDAR antagonist	PCP-site (ion channel)	CCN1CCCC[C@H]1[C@H]1COC(O1)(C1=CC=CC=C1)C1=CC=CC=C1	CCN1CCCC[C@H]1[C@H]1COC(O1)(c1ccccc1)c1ccccc1	6900 nM Ki		TCP	Sax & Wünsch, 2006
(2S)‐2‐[(4S)‐2,2‐diphenyl‐1,3‐dioxolan‐4‐yl]‐1‐propylpiperidine			C23H29NO2			dioxolane	uncompetitive NMDAR antagonist	PCP-site (ion channel)	CCCN1CCCC[C@H]1[C@H]1COC(O1)(C1=CC=CC=C1)C1=CC=CC=C1	CCCN1CCCC[C@H]1[C@H]1COC(O1)(c1ccccc1)c1ccccc1	6800 nM Ki		TCP	Sax & Wünsch, 2006
(2S)‐2‐[(4S)‐2,2‐diphenyl‐1,3‐dioxolan‐4‐yl]piperidin-4-one			C20H21NO3			dioxolane	uncompetitive NMDAR antagonist	PCP-site (ion channel)	O=C1CCN[C@@H](C1)[C@H]1COC(O1)(C1=CC=CC=C1)C1=CC=CC=C1	O=C1CCN[C@@H](C1)[C@H]1COC(O1)(c1ccccc1)c1ccccc1	470 nM Ki		TCP	Sax & Wünsch, 2006
1‐(2,2‐diphenyl‐1,3‐dioxolan‐4‐yl)methanamine			C16H17NO2			dioxolane	uncompetitive NMDAR antagonist	PCP-site (ion channel)	NCC1COC(O1)(C1=CC=CC=C1)C1=CC=CC=C1	NCC1COC(O1)(c1ccccc1)c1ccccc1	1400 nM Ki		TCP	Sax & Wünsch, 2006
1‐(2,2‐diphenyl‐1,3‐dioxolan‐4‐yl)ethan‐1‐amine			C17H19NO2			dioxolane	uncompetitive NMDAR antagonist	PCP-site (ion channel)	CC(N)C1COC(O1)(C1=CC=CC=C1)C1=CC=CC=C1	CC(C1COC(O1)(c1ccccc1)c1ccccc1)N	607 nM Ki		TCP	Sax & Wünsch, 2006
1‐(2,2‐diphenyl‐1,3‐dioxolan‐4‐yl)butan‐1‐amine			C19H23NO2			dioxolane	uncompetitive NMDAR antagonist	PCP-site (ion channel)	CCCC(N)C1COC(O1)(C1=CC=CC=C1)C1=CC=CC=C1	CCCC(C1COC(O1)(c1ccccc1)c1ccccc1)N	3450 nM Ki		TCP	Sax & Wünsch, 2006
[(2,2‐diphenyl‐1,3‐dioxolan‐4‐yl)methyl](methyl)amine			C17H19NO2			dioxolane	uncompetitive NMDAR antagonist	PCP-site (ion channel)	[H]C(NC)C1COC(O1)(C1=CC=CC=C1)C1=CC=CC=C1	CNCC1COC(O1)(c1ccccc1)c1ccccc1	7300 nM Ki		TCP	Sax & Wünsch, 2006
[(2,2‐diphenyl‐1,3‐dioxolan‐4‐yl)methyl](ethyl)amine			C18H21NO2			dioxolane	uncompetitive NMDAR antagonist	PCP-site (ion channel)	CCNCC1COC(O1)(C1=CC=CC=C1)C1=CC=CC=C1	CCNCC1COC(O1)(c1ccccc1)c1ccccc1	8400 nM Ki		TCP	Sax & Wünsch, 2006
[1‐(2,2‐diphenyl‐1,3‐dioxolan‐4‐yl)ethyl](methyl)amine			C18H21NO2			dioxolane	uncompetitive NMDAR antagonist	PCP-site (ion channel)	CNC(C)C1COC(O1)(C1=CC=CC=C1)C1=CC=CC=C1	CNC(C1COC(O1)(c1ccccc1)c1ccccc1)C	703 nM Ki		TCP	Sax & Wünsch, 2006
[1‐(2,2‐diphenyl‐1,3‐dioxolan‐4‐yl)ethyl](ethyl)amine			C19H23NO2			dioxolane	uncompetitive NMDAR antagonist	PCP-site (ion channel)	CCNC(C)C1COC(O1)(C1=CC=CC=C1)C1=CC=CC=C1	CCNC(C1COC(O1)(c1ccccc1)c1ccccc1)C	9000 nM Ki		TCP	Sax & Wünsch, 2006
[(2,2‐diphenyl‐1,3‐dioxolan‐4‐yl)methyl](methyl)amine			C17H19NO2			dioxolane	uncompetitive NMDAR antagonist	PCP-site (ion channel)	CNCC1COC(O1)(C1=CC=CC=C1)C1=CC=CC=C1	CNCC1COC(O1)(c1ccccc1)c1ccccc1	607 nM Ki		TCP	Sax & Wünsch, 2006
1‐(2,2‐diphenyl‐1,3‐dioxan‐4‐yl)methanamine			C17H19NO2	(+/-)		dioxane	uncompetitive NMDAR antagonist	PCP-site (ion channel)	NCC1CCOC(O1)(C1=CC=CC=C1)C1=CC=CC=C1	NCC1CCOC(O1)(c1ccccc1)c1ccccc1	1450 nM Ki		TCP	Sax & Wünsch, 2006
1‐(2,2‐diphenyl‐1,3‐dioxan‐4‐yl)methanamine			C17H19NO2	(S)		dioxane	uncompetitive NMDAR antagonist	PCP-site (ion channel)	NCC1CCOC(O1)(C1=CC=CC=C1)C1=CC=CC=C1	NCC1CCOC(O1)(c1ccccc1)c1ccccc1	717 nM Ki		TCP	Sax & Wünsch, 2006
[(2,2‐diphenyl‐1,3‐dioxan‐4‐yl)methyl](methyl)amine			C18H21NO2	(+/-)		dioxane	uncompetitive NMDAR antagonist	PCP-site (ion channel)	CNCC1CCOC(O1)(C1=CC=CC=C1)C1=CC=CC=C1	CNCC1CCOC(O1)(c1ccccc1)c1ccccc1	3950 nM Ki		TCP	Sax & Wünsch, 2006
2‐(2,2‐diphenyl‐1,3‐dioxolan‐4‐yl)ethan‐1‐amine			C17H19NO2	(+/-)		dioxolane	uncompetitive NMDAR antagonist	PCP-site (ion channel)	NCCC1COC(O1)(C1=CC=CC=C1)C1=CC=CC=C1	NCCC1COC(O1)(c1ccccc1)c1ccccc1	3380 nM Ki		TCP	Sax & Wünsch, 2006
2‐(2,2‐diphenyl‐1,3‐dioxan‐4‐yl)ethan‐1‐amine			C18H21NO2	(+/-)		dioxane	uncompetitive NMDAR antagonist	PCP-site (ion channel)	NCCC1CCOC(O1)(C1=CC=CC=C1)C1=CC=CC=C1	NCCC1CCOC(O1)(c1ccccc1)c1ccccc1	2350 nM Ki		TCP	Sax & Wünsch, 2006
[2‐(2,2‐diphenyl‐1,3‐dioxan‐4‐yl)ethyl](methyl)amine			C19H23NO2	(+/-)		dioxane	uncompetitive NMDAR antagonist	PCP-site (ion channel)	CNCCC1CCOC(O1)(C1=CC=CC=C1)C1=CC=CC=C1	CNCCC1CCOC(O1)(c1ccccc1)c1ccccc1	6870 nM Ki		TCP	Sax & Wünsch, 2006
[2‐(2,2‐diphenyl‐1,3‐dioxan‐4‐yl)ethyl]dimethylamine			C20H25NO2	(+/-)		dioxane	uncompetitive NMDAR antagonist	PCP-site (ion channel)	CN(C)CCC1CCOC(O1)(C1=CC=CC=C1)C1=CC=CC=C1	CN(CCC1CCOC(O1)(c1ccccc1)c1ccccc1)C	24,120 nM Ki		TCP	Sax & Wünsch, 2006
1‐[(2S,4S)‐2‐ethyl‐2‐phenyl‐1,3‐dioxan‐4‐yl]methanamine			C13H19NO2	(S,S) (cis)		dioxolane	uncompetitive NMDAR antagonist	PCP-site (ion channel)	CC[C@@]1(OCC[C@@H](CN)O1)C1=CC=CC=C1	NC[C@@H]1CCO[C@](O1)(CC)c1ccccc1	257, 449 nM Ki		TCP, MK-801	Sax & Wünsch, 2006. Aepkers & Wünsch, 2005.
1‐[(2R,4R)‐2‐ethyl‐2‐phenyl‐1,3‐dioxan‐4‐yl]methanamine			C13H19NO2	(R,R) (cis)		dioxolane	uncompetitive NMDAR antagonist	PCP-site (ion channel)	CC[C@]1(OCC[C@H](CN)O1)C1=CC=CC=C1	NC[C@H]1CCO[C@@](O1)(CC)c1ccccc1	3420 nM Ki		TCP	Sax & Wünsch, 2006
2‐[(2R,4S)‐2‐ethyl‐2‐phenyl‐1,3‐dioxolan‐4‐yl]ethan‐1‐amine			C13H19NO2	(R,S) (cis)		dioxolane	uncompetitive NMDAR antagonist	PCP-site (ion channel)	CC[C@]1(OC[C@H](CCN)O1)C1=CC=CC=C1	NCC[C@H]1CO[C@@](O1)(CC)c1ccccc1	5950, 6030 nM Ki		TCP, MK-801	Sax & Wünsch, 2006. Aepkers & Wünsch, 2005.
2‐[(2S,4R)‐2‐ethyl‐2‐phenyl‐1,3‐dioxolan‐4‐yl]ethan‐1‐amine			C13H19NO2	(S,R) (cis)		dioxolane	uncompetitive NMDAR antagonist	PCP-site (ion channel)	CC[C@@]1(OC[C@@H](CCN)O1)C1=CC=CC=C1	NCC[C@@H]1CO[C@](O1)(CC)c1ccccc1	5000 nM Ki		TCP	Sax & Wünsch, 2006
2‐[(2S,4S)‐2‐ethyl‐2‐phenyl‐1,3‐dioxolan‐4‐yl]ethan‐1‐amine			C13H19NO2	(S,S) (trans)		dioxolane	uncompetitive NMDAR antagonist	PCP-site (ion channel)	CC[C@@]1(OC[C@H](CCN)O1)C1=CC=CC=C1	NCC[C@H]1CO[C@](O1)(CC)c1ccccc1	69, 118 nM Ki		TCP, MK-801	Sax & Wünsch, 2006. Aepkers & Wünsch, 2005.
2‐[(2R,4R)‐2‐ethyl‐2‐phenyl‐1,3‐dioxolan‐4‐yl]ethan‐1‐amine			C13H19NO2	(R,R) (trans)		dioxolane	uncompetitive NMDAR antagonist	PCP-site (ion channel)	CC[C@]1(OC[C@@H](CCN)O1)C1=CC=CC=C1	NCC[C@@H]1CO[C@@](O1)(CC)c1ccccc1	1190 nM Ki		TCP	Sax & Wünsch, 2006
2‐(2‐ethyl‐2‐phenyl‐1,3‐dioxan‐4‐yl)ethan‐1‐amine			C14H21NO2	(+/-) (cis)		dioxolane	uncompetitive NMDAR antagonist	PCP-site (ion channel)	CCC1(OCCC(CCN)O1)C1=CC=CC=C1	CCC1(OCCC(O1)CCN)c1ccccc1	24 nM Ki		TCP	Sax & Wünsch, 2006
[2‐(2‐ethyl‐2‐phenyl‐1,3‐dioxan‐4‐yl)ethyl](methyl)amine			C15H23NO2	(+/-) (cis)		dioxolane	uncompetitive NMDAR antagonist	PCP-site (ion channel)	CCC1(OCCC(CCNC)O1)C1=CC=CC=C1	CNCCC1CCOC(O1)(CC)c1ccccc1	154 nM Ki		TCP	Sax & Wünsch, 2006
[2‐(2‐ethyl‐2‐phenyl‐1,3‐dioxan‐4‐yl)ethyl]dimethylamine			C16H25NO2	(+/-) (cis)		dioxolane	uncompetitive NMDAR antagonist	PCP-site (ion channel)	CCC1(OCCC(CCN(C)C)O1)C1=CC=CC=C1	CCC1(OCCC(O1)CCN(C)C)c1ccccc1	713 nM Ki		TCP	Sax & Wünsch, 2006
3‐(2‐ethyl‐2‐phenyl‐1,3‐dioxan‐4‐yl)propan‐1‐amine			C15H23NO2	(+/-) (cis)		dioxolane	uncompetitive NMDAR antagonist	PCP-site (ion channel)	CCC1(OCCC(CCCN)O1)C1=CC=CC=C1	NCCCC1CCOC(O1)(CC)c1ccccc1	7670 nM Ki		TCP	Sax & Wünsch, 2006
4‐[(2S,4S)‐2‐ethyl‐4‐[(2S)‐piperidin‐2‐yl]‐1,3‐dioxolan‐2‐yl]phenol			C16H23NO3			dioxolane	uncompetitive NMDAR antagonist	PCP-site (ion channel)	CC[C@@]1(OC[C@@H](O1)[C@@H]1CCCCN1)C1=CC=C(O)C=C1	CC[C@@]1(OC[C@@H](O1)[C@@H]1CCCCN1)c1ccc(cc1)O	19,900 nM Ki		TCP	Sax & Wünsch, 2006
(2S)‐2‐[(4S)‐2,2‐diethyl‐1,3‐dioxolan‐4‐yl]piperidine			C12H23NO2			dioxolane	uncompetitive NMDAR antagonist	PCP-site (ion channel)	CCC1(CC)OC[C@@H](O1)[C@@H]1CCCCN1	CCC1(CC)OC[C@@H](O1)[C@@H]1CCCCN1	87,000 nM Ki		TCP	Sax & Wünsch, 2006
(2S)‐1‐benzyl‐2‐[(4R)‐2,2‐diphenyl‐1,3‐dioxolan‐4‐yl]piperidin‐4‐one			C27H27NO3	anti		dioxolane	uncompetitive NMDAR antagonist	PCP-site (ion channel)	[H][C@]1(COC(O1)(C1=CC=CC=C1)C1=CC=CC=C1)[C@]1([H])CC(=O)CCN1CC1=CC=CC=C1	O=C1CCN([C@@H](C1)[C@@H]1COC(O1)(c1ccccc1)c1ccccc1)Cc1ccccc1	5000 nM Ki		MK-801	Sax et al., 2008
(2S)‐1‐benzyl‐2‐[(4S)‐2,2‐diphenyl‐1,3‐dioxolan‐4‐yl]piperidin‐4‐one			C27H27NO3	syn		dioxolane	uncompetitive NMDAR antagonist	PCP-site (ion channel)	[H][C@@]1(COC(O1)(C1=CC=CC=C1)C1=CC=CC=C1)[C@]1([H])CC(=O)CCN1CC1=CC=CC=C1	O=C1CCN([C@@H](C1)[C@H]1COC(O1)(c1ccccc1)c1ccccc1)Cc1ccccc1	4000 nM Ki		MK-801	Sax et al., 2008
(2S)‐2‐[(4R)‐2,2‐diphenyl‐1,3‐dioxolan‐4‐yl]piperidin‐4‐one			C20H21NO3	anti		dioxolane	uncompetitive NMDAR antagonist	PCP-site (ion channel)	[H][C@]1(COC(O1)(C1=CC=CC=C1)C1=CC=CC=C1)[C@]1([H])CC(=O)CCN1	O=C1CCN[C@@H](C1)[C@@H]1COC(O1)(c1ccccc1)c1ccccc1	16,000 nM Ki		MK-801	Sax et al., 2008
(2R)‐1‐benzyl‐2‐{[(4R)‐2,2‐diphenyl‐1,3‐dioxan‐4‐yl]methyl}piperidin‐4‐one			C29H31NO3	anti		dioxane	uncompetitive NMDAR antagonist	PCP-site (ion channel)	[H][C@@]1(C[C@]2([H])CC(=O)CCN2CC2=CC=CC=C2)CCOC(O1)(C1=CC=CC=C1)C1=CC=CC=C1	O=C1CCN([C@@H](C1)C[C@@H]1CCOC(O1)(c1ccccc1)c1ccccc1)Cc1ccccc1	14,000 nM Ki		MK-801	Sax et al., 2008
(2R)‐1‐benzyl‐2‐{[(4S)‐2,2‐diphenyl‐1,3‐dioxan‐4‐yl]methyl}piperidin‐4‐one			C29H31NO3	syn		dioxane	uncompetitive NMDAR antagonist	PCP-site (ion channel)	[H][C@]1(C[C@]2([H])CC(=O)CCN2CC2=CC=CC=C2)CCOC(O1)(C1=CC=CC=C1)C1=CC=CC=C1	O=C1CCN([C@@H](C1)C[C@H]1CCOC(O1)(c1ccccc1)c1ccccc1)Cc1ccccc1	6000 nM Ki		MK-801	Sax et al., 2008
(2R)‐2‐{[(4S)‐2,2‐diphenyl‐1,3‐dioxan‐4‐yl]methyl}piperidin‐4‐one			C22H25NO3	syn		dioxane	uncompetitive NMDAR antagonist	PCP-site (ion channel)	[H][C@@]1(C[C@@]2([H])CCOC(O2)(C2=CC=CC=C2)C2=CC=CC=C2)CC(=O)CCN1	O=C1CCN[C@@H](C1)C[C@H]1CCOC(O1)(c1ccccc1)c1ccccc1	7000-40,000 nM Ki		MK-801	Sax et al., 2008
(2S)‐2‐{[(4S)‐2,2‐diphenyl‐1,3‐dioxolan‐4‐yl]methyl}piperidin‐4‐one			C28H29NO3	(S,S) (anti)		dioxolane	uncompetitive NMDAR antagonist	PCP-site (ion channel)	[H][C@]1(C[C@@]2([H])CC(=O)CCN2CC2=CC=CC=C2)COC(O1)(C1=CC=CC=C1)C1=CC=CC=C1	O=C1CCN([C@H](C1)C[C@H]1COC(O1)(c1ccccc1)c1ccccc1)Cc1ccccc1	26,000 nM Ki		MK-801	Sax et al., 2008
(2R)‐2‐{[(4S)‐2,2‐diphenyl‐1,3‐dioxolan‐4‐yl]methyl}piperidin‐4‐one			C28H29NO3	(R,S) (syn)		dioxolane	uncompetitive NMDAR antagonist	PCP-site (ion channel)	[H][C@]1(C[C@]2([H])CC(=O)CCN2CC2=CC=CC=C2)COC(O1)(C1=CC=CC=C1)C1=CC=CC=C1	O=C1CCN([C@@H](C1)C[C@H]1COC(O1)(c1ccccc1)c1ccccc1)Cc1ccccc1	25,000 nM Ki		MK-801	Sax et al., 2008
(2S)‐2‐{[(4S)‐2,2‐diphenyl‐1,3‐dioxolan‐4‐yl]methyl}piperidin‐4‐one			C21H23NO3	(S,S)		dioxolane	uncompetitive NMDAR antagonist	PCP-site (ion channel)	[H][C@]1(C[C@@]2([H])CC(=O)CCN2)COC(O1)(C1=CC=CC=C1)C1=CC=CC=C1	O=C1CCN[C@H](C1)C[C@H]1COC(O1)(c1ccccc1)c1ccccc1	26,000 nM Ki		MK-801	Sax et al., 2008
(2R)‐2‐{[(4S)‐2,2‐diphenyl‐1,3‐dioxolan‐4‐yl]methyl}piperidin‐4‐one			C21H23NO4	(R,S)		dioxolane	uncompetitive NMDAR antagonist	PCP-site (ion channel)	[H][C@]1(C[C@]2([H])CC(=O)CCN2)COC(O1)(C1=CC=CC=C1)C1=CC=CC=C1	O=C1CCN[C@@H](C1)C[C@H]1COC(O1)(c1ccccc1)c1ccccc1	8000 nM Ki		MK-801	Sax et al., 2008
(2S)‐1‐benzyl‐2‐[(4R)‐2,2‐diphenyl‐1,3‐dioxan‐4‐yl]piperidin‐4‐one			C28H29NO3	syn		dioxane	uncompetitive NMDAR antagonist	PCP-site (ion channel)	[H][C@@]1(CCOC(O1)(C1=CC=CC=C1)C1=CC=CC=C1)[C@]1([H])CC(=O)CCN1CC1=CC=CC=C1	O=C1CCN([C@@H](C1)[C@H]1CCOC(O1)(c1ccccc1)c1ccccc1)Cc1ccccc1	2000 nM Ki		MK-801	Sax et al., 2008
(2S)‐1‐benzyl‐2‐[(4S)‐2,2‐diphenyl‐1,3‐dioxan‐4‐yl]piperidine			C28H31NO2	anti		dioxane	uncompetitive NMDAR antagonist	PCP-site (ion channel)	[H][C@]1(CCOC(O1)(C1=CC=CC=C1)C1=CC=CC=C1)[C@]1([H])CCCCN1CC1=CC=CC=C1	c1ccc(cc1)CN1CCCC[C@H]1[C@@H]1CCOC(O1)(c1ccccc1)c1ccccc1	15,000 nM Ki		MK-801	Sax et al., 2008
3,3,5,5‐tetramethylcyclohexan‐1‐amine	MRZ 2/557		C10H21N			aminoalkylcyclohexane	uncompetitive NMDAR antagonist	PCP-site (ion channel)	[H]C1(N)CC(C)(C)CC(C)(C)C1	NC1CC(C)(C)CC(C1)(C)C	19,920 nM Ki		MK-801	Parsons et al., 1999
1‐(3,3,5,5‐tetramethylcyclohexyl)methanamine	MRZ 2/580		C11H23N			aminoalkylcyclohexane	uncompetitive NMDAR antagonist	PCP-site (ion channel)	[H]C1(CN)CC(C)(C)CC(C)(C)C1	NCC1CC(C)(C)CC(C1)(C)C	17,840 nM Ki		MK-801	Parsons et al., 1999
1‐ethyl‐3,3,5,5‐tetramethylcyclohexan‐1‐amine	MRZ 2/600		C12H25N			aminoalkylcyclohexane	uncompetitive NMDAR antagonist	PCP-site (ion channel)	CCC1(N)CC(C)(C)CC(C)(C)C1	CCC1(N)CC(C)(C)CC(C1)(C)C	2280 nM Ki		MK-801	Parsons et al., 1999
3,3,5,5‐tetramethyl‐1‐propylcyclohexan‐1‐amine	MRZ 2/601		C13H27N			aminoalkylcyclohexane	uncompetitive NMDAR antagonist	PCP-site (ion channel)	CCCC1(N)CC(C)(C)CC(C)(C)C1	CCCC1(N)CC(C)(C)CC(C1)(C)C	8090, 7700 nM Ki		MK-801	Parsons et al., 1999. Rammes et al., 2001.
(1R,5S)‐1,3,3,5‐tetramethylcyclohexan‐1‐amine	MRZ 2/607		C10H21N			aminoalkylcyclohexane	uncompetitive NMDAR antagonist	PCP-site (ion channel)	[H][C@]1(C)CC(C)(C)C[C@](C)(N)C1	C[C@H]1CC(C)(C)C[C@](C1)(C)N	7740, 7700 nM Ki		MK-801	Parsons et al., 1999. Rammes et al., 2001.
(1S,5R)‐1,3,3,5‐tetramethyl‐5‐propylcyclohexan‐1‐amine	MRZ 2/614		C13H27N			aminoalkylcyclohexane	uncompetitive NMDAR antagonist	PCP-site (ion channel)	CCC[C@]1(C)CC(C)(C)C[C@](C)(N)C1	CCC[C@]1(C)CC(C)(C)C[C@](C1)(C)N	13,590 nM Ki		MK-801	Parsons et al., 1999
(1S,5S)‐1,3,3,5‐tetramethyl‐5‐propylcyclohexan‐1‐amine	MRZ 2/614		C13H27N			aminoalkylcyclohexane	uncompetitive NMDAR antagonist	PCP-site (ion channel)	CCC[C@@]1(C)CC(C)(C)C[C@](C)(N)C1	CCC[C@@]1(C)CC(C)(C)C[C@](C1)(C)N	13,590 nM Ki		MK-801	Parsons et al., 1999
(1S,3R)‐3‐ethyl‐1,3,5,5‐tetramethylcyclohexan‐1‐amine	MRZ 2/615		C12H25N			aminoalkylcyclohexane	uncompetitive NMDAR antagonist	PCP-site (ion channel)	CC[C@]1(C)CC(C)(C)C[C@](C)(N)C1	CC[C@]1(C)CC(C)(C)C[C@](C1)(C)N	2420, 2300 nM Ki		MK-801	Parsons et al., 1999. Rammes et al., 2001.
(1S,3S)‐3‐ethyl‐1,3,5,5‐tetramethylcyclohexan‐1‐amine	MRZ 2/615		C12H25N			aminoalkylcyclohexane	uncompetitive NMDAR antagonist	PCP-site (ion channel)	CC[C@@]1(C)CC(C)(C)C[C@](C)(N)C1	CC[C@@]1(C)CC(C)(C)C[C@](C1)(C)N	2420, 2300 nM Ki		MK-801	Parsons et al., 1999. Rammes et al., 2001.
(1r,3R,5S)‐1,3,5‐trimethylcyclohexan‐1‐amine	MRZ 2/616		C9H19N			aminoalkylcyclohexane	uncompetitive NMDAR antagonist	PCP-site (ion channel)	C[C@H]1C[C@@H](C)C[C@](C)(N)C1	C[C@@H]1C[C@H](C)C[C@@](C1)(C)N	10,420 nM Ki		MK-801	Parsons et al., 1999. Rammes et al., 2001.
(1s,3R,5S)‐1,3,5‐trimethylcyclohexan‐1‐amine	MRZ 2/616		C9H19N			aminoalkylcyclohexane	uncompetitive NMDAR antagonist	PCP-site (ion channel)	C[C@H]1C[C@@H](C)C[C@@](C)(N)C1	C[C@@H]1C[C@H](C)C[C@](C1)(C)N	10,420 nM Ki		MK-801	Parsons et al., 1999. Rammes et al., 2001.
(1S,3R,5R)‐1,3,5‐trimethyl‐3‐propylcyclohexan‐1‐amine	MRZ 2/618		C12H25N			aminoalkylcyclohexane	uncompetitive NMDAR antagonist	PCP-site (ion channel)	[H][C@]1(C)C[C@](C)(N)C[C@](C)(CCC)C1	CCC[C@]1(C)C[C@@H](C)C[C@](C1)(C)N	24,020 nM Ki		MK-801	Parsons et al., 1999
(1S,3R)‐3‐ethyl‐1,3‐dimethylcyclohexan‐1‐amine	MRZ 2/620		C10H21N			aminoalkylcyclohexane	uncompetitive NMDAR antagonist	PCP-site (ion channel)	CC[C@]1(C)CCC[C@](C)(N)C1	CC[C@]1(C)CCC[C@](C1)(C)N	25,480 nM Ki		MK-801	Parsons et al., 1999
(1S,3S)‐3‐ethyl‐1,3‐dimethylcyclohexan‐1‐amine	MRZ 2/620		C10H21N			aminoalkylcyclohexane	uncompetitive NMDAR antagonist	PCP-site (ion channel)	CC[C@@]1(C)CCC[C@](C)(N)C1	CC[C@@]1(C)CCC[C@](C1)(C)N	25,480 nM Ki		MK-801	Parsons et al., 1999
(1S,3R,5R)‐3‐ethyl‐1,3,5‐trimethylcyclohexan‐1‐amine	MRZ 2/622		C11H23N			aminoalkylcyclohexane	uncompetitive NMDAR antagonist	PCP-site (ion channel)	[H][C@]1(C)C[C@](C)(N)C[C@](C)(CC)C1	CC[C@]1(C)C[C@@H](C)C[C@](C1)(C)N	13,320 nM Ki		MK-801	Parsons et al., 1999
(1S)‐3,3‐diethyl‐1,5,5‐trimethylcyclohexan‐1‐amine	MRZ 2/623		C13H27N			aminoalkylcyclohexane	uncompetitive NMDAR antagonist	PCP-site (ion channel)	CCC1(CC)CC(C)(C)C[C@](C)(N)C1	CCC1(CC)CC(C)(C)C[C@](C1)(C)N	3160 nM Ki		MK-801	Parsons et al., 1999
(1S,3S,5S)‐3‐ethyl‐1,3,5‐trimethylcyclohexan‐1‐amine	MRZ 2/624		C11H23N			aminoalkylcyclohexane	uncompetitive NMDAR antagonist	PCP-site (ion channel)	[H][C@@]1(C)C[C@](C)(N)C[C@@](C)(CC)C1	CC[C@@]1(C)C[C@H](C)C[C@](C1)(C)N	15,140 nM Ki		MK-801	Parsons et al., 1999
(1S)‐1,3,3‐trimethyl‐5,5‐dipropylcyclohexan‐1‐amine	MRZ 2/626		C15H31N			aminoalkylcyclohexane	uncompetitive NMDAR antagonist	PCP-site (ion channel)	CCCC1(CCC)CC(C)(C)C[C@](C)(N)C1	CCCC1(CCC)CC(C)(C)C[C@](C1)(C)N	16,480 nM Ki		MK-801	Parsons et al., 1999
(1R,5R)‐5‐ethyl‐1,3,3‐trimethylcyclohexan‐1‐amine	MRZ 2/632		C11H23N			aminoalkylcyclohexane	uncompetitive NMDAR antagonist	PCP-site (ion channel)	[H][C@@]1(CC)CC(C)(C)C[C@](C)(N)C1	CC[C@@H]1CC(C)(C)C[C@](C1)(C)N	2880 nM Ki		MK-801	Parsons et al., 1999. Rammes et al., 2001.
(1R,5S)‐5‐ethyl‐1,3,3‐trimethylcyclohexan‐1‐amine	MRZ 2/633		C11H23N			aminoalkylcyclohexane	uncompetitive NMDAR antagonist	PCP-site (ion channel)	[H][C@]1(CC)CC(C)(C)C[C@](C)(N)C1	CC[C@H]1CC(C)(C)C[C@](C1)(C)N	5180, 4700 nM Ki		MK-801	Parsons et al., 1999. Rammes et al., 2001.
(1R,5R)‐1,3,3‐trimethyl‐5‐propylcyclohexan‐1‐amine	MRZ 2/634		C12H25N			aminoalkylcyclohexane	uncompetitive NMDAR antagonist	PCP-site (ion channel)	[H][C@@]1(CCC)CC(C)(C)C[C@](C)(N)C1	CCC[C@@H]1CC(C)(C)C[C@](C1)(C)N	13,400 nM Ki		MK-801	Parsons et al., 1999
(1R,5S)‐1,3,3‐trimethyl‐5‐propylcyclohexan‐1‐amine	MRZ 2/635		C12H25N			aminoalkylcyclohexane	uncompetitive NMDAR antagonist	PCP-site (ion channel)	[H][C@]1(CCC)CC(C)(C)C[C@](C)(N)C1	CCC[C@H]1CC(C)(C)C[C@](C1)(C)N	15,010 nM Ki		MK-801	Parsons et al., 1999
N‐ethyl‐1,3,3,5,5‐pentamethylcyclohexan‐1‐amine	MRZ 2/639		C13H27N			aminoalkylcyclohexane	uncompetitive NMDAR antagonist	PCP-site (ion channel)	CCNC1(C)CC(C)(C)CC(C)(C)C1	CCNC1(C)CC(C)(C)CC(C1)(C)C	4170 nM Ki		MK-801	Parsons et al., 1999
N,1,3,3,5,5‐hexamethylcyclohexan‐1‐amine	MRZ 2/640		C12H25N			aminoalkylcyclohexane	uncompetitive NMDAR antagonist	PCP-site (ion channel)	CNC1(C)CC(C)(C)CC(C)(C)C1	CNC1(C)CC(C)(C)CC(C1)(C)C	4830 nM Ki		MK-801	Parsons et al., 1999. Rammes et al., 2001.
N,N,1,3,3,5,5‐heptamethylcyclohexan‐1‐amine	MRZ 2/642		C13H27N			aminoalkylcyclohexane	uncompetitive NMDAR antagonist	PCP-site (ion channel)	[H]C1([H])CC([H])([H])CC(C)(N)C1	CC1(N)CCCCC1	12,720, 10,700 nM Ki		MK-801	Parsons et al., 1999. Rammes et al., 2001.
(1R,5R)‐1,3,3,5‐tetramethylcyclohexan‐1‐amine	MRZ 2/643		C10H21N			aminoalkylcyclohexane	uncompetitive NMDAR antagonist	PCP-site (ion channel)	[H][C@@]1(C)CC(C)(C)C[C@](C)(N)C1	C[C@@H]1CC(C)(C)C[C@](C1)(C)N	4660 nM Ki		MK-801	Parsons et al., 1999
2‐(3,3,5,5‐tetramethylcyclohexyl)ethan‐1‐amine	MRZ 2/644		C12H25N			aminoalkylcyclohexane	uncompetitive NMDAR antagonist	PCP-site (ion channel)	[H]C1(CCN)CC(C)(C)CC(C)(C)C1	NCCC1CC(C)(C)CC(C1)(C)C	4840 nM Ki		MK-801	Parsons et al., 1999
2‐(1,3,3,5,5‐pentamethylcyclohexyl)ethan‐1‐amine	MRZ 2/662		C13H27N			aminoalkylcyclohexane	uncompetitive NMDAR antagonist	PCP-site (ion channel)	CC1(C)CC(C)(C)CC(C)(CCN)C1	NCCC1(C)CC(C)(C)CC(C1)(C)C	3440 nM Ki		MK-801	Parsons et al., 1999
(1S,3S)‐1,3‐dimethyl‐3‐propylcyclohexan‐1‐amine	MRZ 2/617		C11H23N			aminoalkylcyclohexane	uncompetitive NMDAR antagonist	PCP-site (ion channel)	CCC[C@@]1(C)CCC[C@](C)(N)C1	CCC[C@@]1(C)CCC[C@](C1)(C)N	38,030 nM Ki		MK-801	Parsons et al., 1999
(1S,3R)‐1,3‐dimethyl‐3‐propylcyclohexan‐1‐amine	MRZ 2/617		C11H23N			aminoalkylcyclohexane	uncompetitive NMDAR antagonist	PCP-site (ion channel)	CCC[C@]1(C)CCC[C@](C)(N)C1	CCC[C@]1(C)CCC[C@](C1)(C)N	38,030 nM Ki		MK-801	Parsons et al., 1999
(1S,3S,5S)‐1,3,5‐trimethyl‐3‐propylcyclohexan‐1‐amine	MRZ 2/619		C12H25N			aminoalkylcyclohexane	uncompetitive NMDAR antagonist	PCP-site (ion channel)	[H][C@@]1(C)C[C@](C)(N)C[C@@](C)(CCC)C1	CCC[C@@]1(C)C[C@H](C)C[C@](C1)(C)N	57,760 nM Ki		MK-801	Parsons et al., 1999
(1S)‐1,3,3‐trimethylcyclohexan‐1‐amine	MRZ 2/621		C9H19N			aminoalkylcyclohexane	uncompetitive NMDAR antagonist	PCP-site (ion channel)	[H]C1([H])CC(C)(C)C[C@@](C)(N)C1	CC1(C)CCC[C@](C1)(C)N	32,200, 30,600 nM Ki		MK-801	Parsons et al., 1999. Rammes et al., 2001.
(1S,3S)‐1,3‐dimethylcyclohexan‐1‐amine	MRZ 2/625		C8H17N			aminoalkylcyclohexane	uncompetitive NMDAR antagonist	PCP-site (ion channel)	[H]C1([H])C[C@]([H])(C)C[C@@](C)(N)C1	C[C@H]1CCC[C@](C1)(C)N	52,610 nM Ki		MK-801	Parsons et al., 1999
(1S,3S)‐1‐methyl‐3‐propylcyclohexan‐1‐amine	MRZ 2/627		C10H21N			aminoalkylcyclohexane	uncompetitive NMDAR antagonist	PCP-site (ion channel)	[H]C1([H])C[C@]([H])(CCC)C[C@@](C)(N)C1	CCC[C@H]1CCC[C@](C1)(C)N	70,950 nM Ki		MK-801	Parsons et al., 1999
(1S,3R)‐1‐methyl‐3‐propylcyclohexan‐1‐amine	MRZ 2/628		C10H21N			aminoalkylcyclohexane	uncompetitive NMDAR antagonist	PCP-site (ion channel)	[H]C1([H])C[C@@]([H])(CCC)C[C@@](C)(N)C1	CCC[C@@H]1CCC[C@](C1)(C)N	49,180 nM Ki		MK-801	Parsons et al., 1999
(1S,3S)‐3‐ethyl‐1‐methylcyclohexan‐1‐amine	MRZ 2/629		C9H19N			aminoalkylcyclohexane	uncompetitive NMDAR antagonist	PCP-site (ion channel)	[H]C1([H])C[C@]([H])(CC)C[C@@](C)(N)C1	CC[C@H]1CCC[C@](C1)(C)N	49,280 nM Ki		MK-801	Parsons et al., 1999
(1S,3R)‐3‐ethyl‐1‐methylcyclohexan‐1‐amine	MRZ 2/630		C9H19N			aminoalkylcyclohexane	uncompetitive NMDAR antagonist	PCP-site (ion channel)	[H]C1([H])C[C@@]([H])(CC)C[C@@](C)(N)C1	CC[C@@H]1CCC[C@](C1)(C)N	49,100 nM Ki		MK-801	Parsons et al., 1999
(1S,3R)‐1,3‐dimethylcyclohexan‐1‐amine	MRZ 2/631		C8H17N			aminoalkylcyclohexane	uncompetitive NMDAR antagonist	PCP-site (ion channel)	[H]C1([H])C[C@@H](C)C[C@]([H])(C)C1	C[C@@H]1CCC[C@H](C1)C	65,290 nM Ki		MK-801	Parsons et al., 1999
2‐methyl‐1‐(3,3,5,5‐tetramethylcyclohexyl)propan‐2‐amine	MRZ 2/645		C14H29N			aminoalkylcyclohexane	uncompetitive NMDAR antagonist	PCP-site (ion channel)	[H]C1(CC(C)(C)N)CC(C)(C)CC(C)(C)C1	CC(CC1CC(C)(C)CC(C1)(C)C)(N)C	60,170 nM Ki		MK-801	Parsons et al., 1999
4‐phenyl‐1‐(1‐phenylcyclohexyl)piperidin‐4‐ol			C23H29NO			arylcyclohexylamine	uncompetitive NMDAR antagonist	PCP-site (ion channel)	OC1(CCN(CC1)C1(CCCCC1)C1=CC=CC=C1)C1=CC=CC=C1	OC1(CCN(CC1)C1(CCCCC1)c1ccccc1)c1ccccc1		74-90		Itzhak et al., 1981
4‐phenyl‐1‐(1‐phenylcyclohexyl)piperidine			C23H29N			arylcyclohexylamine	uncompetitive NMDAR antagonist	PCP-site (ion channel)	[H]C1(CCN(CC1)C1(CCCCC1)C1=CC=CC=C1)C1=CC=CC=C1	c1ccc(cc1)C1CCN(CC1)C1(CCCCC1)c1ccccc1		7100-7900		Itzhak et al., 1981
1‐(4‐methyl‐1‐phenylcyclohexyl)piperidine			C18H27N	cis		arylcyclohexylamine	uncompetitive NMDAR antagonist	PCP-site (ion channel)	CC1CCC(CC1)(N1CCCCC1)C1=CC=CC=C1	CC1CCC(CC1)(N1CCCCC1)c1ccccc1	500 nM Ki		PCP	Chaudieu et al., 1989
1‐(4‐methyl‐1‐phenylcyclohexyl)piperidine			C18H27N	trans		arylcyclohexylamine	uncompetitive NMDAR antagonist	PCP-site (ion channel)	CC1CCC(CC1)(N1CCCCC1)C1=CC=CC=C1	CC1CCC(CC1)(N1CCCCC1)c1ccccc1	130 nM Ki		PCP	Chaudieu et al., 1989
1‐(3‐methyl‐1‐phenylcyclohexyl)piperidine			C18H27N	cis and trans		arylcyclohexylamine	uncompetitive NMDAR antagonist	PCP-site (ion channel)	CC1CCCC(C1)(N1CCCCC1)C1=CC=CC=C1	CC1CCCC(C1)(N1CCCCC1)c1ccccc1	600 nM Ki		PCP	Chaudieu et al., 1989
1‐(2‐methyl‐1‐phenylcyclohexyl)piperidine			C18H27N	cis		arylcyclohexylamine	uncompetitive NMDAR antagonist	PCP-site (ion channel)	CC1CCCCC1(N1CCCCC1)C1=CC=CC=C1	CC1CCCCC1(N1CCCCC1)c1ccccc1	120 nM Ki		PCP	Chaudieu et al., 1989
1‐(2‐methyl‐1‐phenylcyclohexyl)piperidine			C18H27N	trans		arylcyclohexylamine	uncompetitive NMDAR antagonist	PCP-site (ion channel)	CC1CCCCC1(N1CCCCC1)C1=CC=CC=C1	CC1CCCCC1(N1CCCCC1)c1ccccc1	1600 nM Ki		PCP	Chaudieu et al., 1989
1‐(2‐methoxy‐1‐phenylcyclohexyl)piperidine			C18H27NO	trans		arylcyclohexylamine	uncompetitive NMDAR antagonist	PCP-site (ion channel)	COC1CCCCC1(N1CCCCC1)C1=CC=CC=C1	COC1CCCCC1(N1CCCCC1)c1ccccc1	5000 nM Ki		PCP	Chaudieu et al., 1989
1‐(2‐methoxy‐1‐phenylcyclohexyl)piperidine			C18H27NO	cis		arylcyclohexylamine	uncompetitive NMDAR antagonist	PCP-site (ion channel)	COC1CCCCC1(N1CCCCC1)C1=CC=CC=C1	COC1CCCCC1(N1CCCCC1)c1ccccc1	830 nM Ki		PCP	Chaudieu et al., 1989
1‐(4,4‐dimethyl‐1‐phenylcyclohexyl)piperidine			C19H29N			arylcyclohexylamine	uncompetitive NMDAR antagonist	PCP-site (ion channel)	CC1(C)CCC(CC1)(N1CCCCC1)C1=CC=CC=C1	CC1(C)CCC(CC1)(N1CCCCC1)c1ccccc1	5000 nM Ki		PCP	Chaudieu et al., 1989
1‐(3,3,5‐trimethyl‐1‐phenylcyclohexyl)piperidine			C20H31N	cis @ 5-me		arylcyclohexylamine	uncompetitive NMDAR antagonist	PCP-site (ion channel)	CC1CC(C)(C)CC(C1)(N1CCCCC1)C1=CC=CC=C1	CC1CC(C)(C)CC(C1)(N1CCCCC1)c1ccccc1	6300 nM Ki		PCP	Chaudieu et al., 1989
1‐(3,3,5‐trimethyl‐1‐phenylcyclohexyl)piperidine			C20H31N	trans @ 5-me		arylcyclohexylamine	uncompetitive NMDAR antagonist	PCP-site (ion channel)	CC1CC(C)(C)CC(C1)(N1CCCCC1)C1=CC=CC=C1	CC1CC(C)(C)CC(C1)(N1CCCCC1)c1ccccc1	10,000 nM Ki		PCP	Chaudieu et al., 1989
1‐(1‐phenylcyclohexyl)piperidin‐4‐ol			C17H25NO			arylcyclohexylamine	uncompetitive NMDAR antagonist	PCP-site (ion channel)	OC1CCN(CC1)C1(CCCCC1)C1=CC=CC=C1	OC1CCN(CC1)C1(CCCCC1)c1ccccc1	2200 nM Ki		PCP	Chaudieu et al., 1989
3‐methyl‐1‐(1‐phenylcyclohexyl)piperidine			C18H27N			arylcyclohexylamine	uncompetitive NMDAR antagonist	PCP-site (ion channel)	CC1CCCN(C1)C1(CCCCC1)C1=CC=CC=C1	CC1CCCN(C1)C1(CCCCC1)c1ccccc1	160 nM Ki		PCP	Chaudieu et al., 1989
1‐[1‐(3‐nitrophenyl)cyclohexyl]piperidine			C17H24N[N+]O[O-]			arylcyclohexylamine	uncompetitive NMDAR antagonist	PCP-site (ion channel)	[O-][N+](=O)C1=CC=CC(=C1)C1(CCCCC1)N1CCCCC1	[O-][N+](=O)c1cccc(c1)C1(CCCCC1)N1CCCCC1	11,500 nM Ki		PCP	Chaudieu et al., 1989
4‐[1‐(piperidin‐1‐yl)cyclohexyl]phenol			C17H25NO			arylcyclohexylamine	uncompetitive NMDAR antagonist	PCP-site (ion channel)	OC1=CC=C(C=C1)C1(CCCCC1)N1CCCCC1	Oc1ccc(cc1)C1(CCCCC1)N1CCCCC1	20,000 nM Ki		PCP	Chaudieu et al., 1989
3‐[1‐(piperidin‐1‐yl)cyclohexyl]phenol			C17H25NO			arylcyclohexylamine	uncompetitive NMDAR antagonist	PCP-site (ion channel)	OC1=CC=CC(=C1)C1(CCCCC1)N1CCCCC1	Oc1cccc(c1)C1(CCCCC1)N1CCCCC1	30 nM Ki		PCP	Chaudieu et al., 1989
2‐[1‐(piperidin‐1‐yl)cyclohexyl]phenol			C17H25NO			arylcyclohexylamine	uncompetitive NMDAR antagonist	PCP-site (ion channel)	OC1=C(C=CC=C1)C1(CCCCC1)N1CCCCC1	Oc1ccccc1C1(CCCCC1)N1CCCCC1	750 nM Ki		PCP	Chaudieu et al., 1989
1‐[1‐(3‐methoxyphenyl)cyclohexyl]piperidine			C18H27NO			arylcyclohexylamine	uncompetitive NMDAR antagonist	PCP-site (ion channel)	COC1=CC=CC(=C1)C1(CCCCC1)N1CCCCC1	COc1cccc(c1)C1(CCCCC1)N1CCCCC1	90 nM Ki		PCP	Chaudieu et al., 1989
1‐[1‐(3,4‐dimethoxyphenyl)cyclohexyl]piperidine	3,4-DiMeO-PCP		C19H29NO2			arylcyclohexylamine	uncompetitive NMDAR antagonist	PCP-site (ion channel)	COC1=C(OC)C=C(C=C1)C1(CCCCC1)N1CCCCC1	COc1cc(ccc1OC)C1(CCCCC1)N1CCCCC1	9500, 1727 nM Ki	2712	PCP (9500), MK-801 rest	Chaudieu et al., 1989. Wallach
1‐[1‐(4‐methoxyphenyl)‐4‐methylcyclohexyl]piperidine			C19H29NO	cis @ 4-me		arylcyclohexylamine	uncompetitive NMDAR antagonist	PCP-site (ion channel)	COC1=CC=C(C=C1)C1(CCC(C)CC1)N1CCCCC1	COc1ccc(cc1)C1(CCC(CC1)C)N1CCCCC1	4800 nM Ki		PCP	Chaudieu et al., 1989
1‐[1‐(4‐methoxyphenyl)‐4‐methylcyclohexyl]piperidine			C19H29NO	trans @ 4-me		arylcyclohexylamine	uncompetitive NMDAR antagonist	PCP-site (ion channel)	COC1=CC=C(C=C1)C1(CCC(C)CC1)N1CCCCC1	COc1ccc(cc1)C1(CCC(CC1)C)N1CCCCC1	2200 nM Ki		PCP	Chaudieu et al., 1989
1‐[1‐(3‐methoxyphenyl)‐4‐methylcyclohexyl]piperidine			C19H29NO	cis @ 4-me		arylcyclohexylamine	uncompetitive NMDAR antagonist	PCP-site (ion channel)	COC1=CC=CC(=C1)C1(CCC(C)CC1)N1CCCCC1	COc1cccc(c1)C1(CCC(CC1)C)N1CCCCC1	440 nM Ki		PCP	Chaudieu et al., 1989
1‐[1‐(3‐methoxyphenyl)‐4‐methylcyclohexyl]piperidine			C19H29NO	trans @ 4-me		arylcyclohexylamine	uncompetitive NMDAR antagonist	PCP-site (ion channel)	COC1=CC=CC(=C1)C1(CCC(C)CC1)N1CCCCC1	COc1cccc(c1)C1(CCC(CC1)C)N1CCCCC1	58 nM Ki		PCP	Chaudieu et al., 1989
1‐[1‐(thiophen‐2‐yl)cyclohexyl]piperidine			C15H23NS			arylcyclohexylamine	uncompetitive NMDAR antagonist	PCP-site (ion channel)	C1CCN(CC1)C1(CCCCC1)C1=CC=CS1	C1CCN(CC1)C1(CCCCC1)c1cccs1	26 nM Ki		PCP	Chaudieu et al., 1989
1‐[2‐methyl‐1‐(thiophen‐2‐yl)cyclohexyl]piperidine			C16H25NS	cis @ 2-me		arylcyclohexylamine	uncompetitive NMDAR antagonist	PCP-site (ion channel)	CC1CCCCC1(N1CCCCC1)C1=CC=CS1	CC1CCCCC1(N1CCCCC1)c1cccs1	40 nM Ki		PCP	Chaudieu et al., 1989
1‐[2‐methyl‐1‐(thiophen‐2‐yl)cyclohexyl]piperidine			C16H25NS	trans @ 2-me		arylcyclohexylamine	uncompetitive NMDAR antagonist	PCP-site (ion channel)	CC1CCCCC1(N1CCCCC1)C1=CC=CS1	CC1CCCCC1(N1CCCCC1)c1cccs1	1000 nM Ki		PCP	Chaudieu et al., 1989
1‐[4‐methyl‐1‐(thiophen‐2‐yl)cyclohexyl]piperidine			C16H25NS	cis @ 4-me		arylcyclohexylamine	uncompetitive NMDAR antagonist	PCP-site (ion channel)	CC1CCC(CC1)(N1CCCCC1)C1=CC=CS1	CC1CCC(CC1)(N1CCCCC1)c1cccs1	1000 nM Ki		PCP	Chaudieu et al., 1989
1‐[4‐methyl‐1‐(thiophen‐2‐yl)cyclohexyl]piperidine			C16H25NS	trans @ 4-me		arylcyclohexylamine	uncompetitive NMDAR antagonist	PCP-site (ion channel)	CC1CCC(CC1)(N1CCCCC1)C1=CC=CS1	CC1CCC(CC1)(N1CCCCC1)c1cccs1	140 nM Ki		PCP	Chaudieu et al., 1989
4‐(piperidin‐1‐yl)‐4‐(thiophen‐2‐yl)cyclohexan‐1‐ol			C15H23NOS	trans @ 4-oh		arylcyclohexylamine	uncompetitive NMDAR antagonist	PCP-site (ion channel)	OC1CCC(CC1)(N1CCCCC1)C1=CC=CS1	OC1CCC(CC1)(N1CCCCC1)c1cccs1	8000 nM Ki		PCP	Chaudieu et al., 1989
1‐[1‐(thiophen‐2‐yl)cyclohexyl]‐1,2,3,6‐tetrahydropyridine			C15H21NS			arylcyclohexylamine	uncompetitive NMDAR antagonist	PCP-site (ion channel)	C1CCC(CC1)(N1CCC=CC1)C1=CC=CS1	C1CCC(CC1)(N1CCC=CC1)c1cccs1	17 nM Ki		PCP	Chaudieu et al., 1989
1‐[1‐(2‐benzothiophen‐1‐yl)cyclohexyl]piperidine			C19H25NS			arylcyclohexylamine	uncompetitive NMDAR antagonist	PCP-site (ion channel)	C1CCN(CC1)C1(CCCCC1)C1=C2C=CC=CC2=CS1	C1CCC(CC1)(N1CCCCC1)c1scc2c1cccc2	6800 nM Ki		PCP	Chaudieu et al., 1989
(4R,4aS,7aR,12bS)-4a,9-dihydroxy-3-prop-2-enyl-2,4,5,6,7a,13-hexahydro-1H-4,12-methanobenzofuro[3,2-e]isoquinolin-7-one		naloxone	C19H21NO4		Narcan		uncompetitive NMDAR antagonist	PCP-site (ion channel)	C=CCN1CC[C@]23[C@@H]4C(=O)CC[C@]2([C@H]1CC5=C3C(=C(C=C5)O)O4)O	C=CCN1CCC23C4(C1Cc1c3c(OC2C(=O)CC4)c(cc1)O)O	3200 nM Ki	3230		Mendelsohn et al., 1984
3‐methyl‐1‐(1‐phenylcyclohexyl)piperidine	PCMP		C18H27N			arylcyclohexylamine	uncompetitive NMDAR antagonist	PCP-site (ion channel)	CC1CCCN(C1)C1(CCCCC1)C1=CC=CC=C1	CC1CCCN(C1)C1(CCCCC1)c1ccccc1		52(+), 1100(-), 71(+/-)	PCP	Kozlowski et al., 1986
1‐(1‐phenylcyclohexyl)‐1,2,3,6‐tetrahydropyridine			C17H23N			arylcyclohexylamine	uncompetitive NMDAR antagonist	PCP-site (ion channel)	C1CCC(CC1)(N1CCC=CC1)C1=CC=CC=C1	C1CCC(CC1)(N1CCC=CC1)c1ccccc1		86	PCP	Kozlowski et al., 1986
[1‐(1‐phenylcyclohexyl)piperidin‐3‐yl]methanol			C18H27NO			arylcyclohexylamine	uncompetitive NMDAR antagonist	PCP-site (ion channel)	OCC1CCCN(C1)C1(CCCCC1)C1=CC=CC=C1	OCC1CCCN(C1)C1(CCCCC1)c1ccccc1		100	PCP	Kozlowski et al., 1986
4‐methyl‐1‐(1‐phenylcyclohexyl)piperidine			C18H27N			arylcyclohexylamine	uncompetitive NMDAR antagonist	PCP-site (ion channel)	CC1CCN(CC1)C1(CCCCC1)C1=CC=CC=C1	CC1CCN(CC1)C1(CCCCC1)c1ccccc1		1200	PCP	Kozlowski et al., 1986
4,4‐dimethyl‐1‐(1‐phenylcyclohexyl)piperidine			C19H29N			arylcyclohexylamine	uncompetitive NMDAR antagonist	PCP-site (ion channel)	CC1(C)CCN(CC1)C1(CCCCC1)C1=CC=CC=C1	CC1(C)CCN(CC1)C1(CCCCC1)c1ccccc1		5000	PCP	Kozlowski et al., 1986
4‐phenyl‐1‐(1‐phenylcyclohexyl)‐1,2,3,6‐tetrahydropyridine			C23H27N			arylcyclohexylamine	uncompetitive NMDAR antagonist	PCP-site (ion channel)	C1CCC(CC1)(N1CCC(=CC1)C1=CC=CC=C1)C1=CC=CC=C1	c1ccc(cc1)C1=CCN(CC1)C1(CCCCC1)c1ccccc1		5000	PCP	Kozlowski et al., 1986
1‐[1‐(3‐isothiocyanatophenyl)cyclohexyl]piperidine		metaphit	C18H24N2S			arylcyclohexylamine, isothiocyanate	uncompetitive NMDAR antagonist	PCP-site (ion channel)	S=C=NC1=CC(=CC=C1)C1(CCCCC1)N1CCCCC1	S=C=Nc1cccc(c1)C1(CCCCC1)N1CCCCC1	535 nM Ki		MK-801	Linders et al., 1993
(1S,9R)‐13‐isothiocyanato‐1‐methyl‐16‐azatetracyclo[7.6.1.0^(2,7).0^(10,15)]hexadeca‐2,4,6,10,12,14‐hexaene			C17H14N2S			arylcyclohexylamine, isothiocyanate	uncompetitive NMDAR antagonist	PCP-site (ion channel)	C[C@]12N[C@H](CC3=CC=CC=C13)C1=CC=C(C=C21)N=C=S	S=C=Nc1ccc2c(c1)[C@@]1(C)N[C@@H]2Cc2c1cccc2	37(+), 838(-) nM Ki		MK-801	Linders et al., 1993
(1S,9R)‐12‐isothiocyanato‐1‐methyl‐16‐azatetracyclo[7.6.1.0^(2,7).0^(10,15)]hexadeca‐2,4,6,10,12,14‐hexaene			C17H14N2S			arylcyclohexylamine, isothiocyanate	uncompetitive NMDAR antagonist	PCP-site (ion channel)	C[C@]12N[C@H](CC3=CC=CC=C13)C1=CC(=CC=C21)N=C=S	S=C=Nc1ccc2c(c1)[C@H]1Cc3c([C@@]2(N1)C)cccc3	843(+) nM Ki		MK-801	Linders et al., 1993
(2S)‐2‐[(2S,4S)‐2‐ethyl‐2‐(3‐isothiocyanatophenyl)‐1,3‐dioxolan‐4‐yl]piperidine			C17H22N2O2S			isothiocyanate, dioxolane	uncompetitive NMDAR antagonist	PCP-site (ion channel)	CC[C@@]1(OC[C@@H](O1)[C@@H]1CCCCN1)C1=CC=CC(=C1)N=C=S	S=C=Nc1cccc(c1)[C@@]1(CC)OC[C@@H](O1)[C@@H]1CCCCN1	94 nM Ki		MK-801	Linders et al., 1993
1,16-dimethyl-16-azatetracyclo[7.6.1.0^(2,7).0^(10,15)]hexadeca-2,4,6,10,12,14-hexaene			C17H17N			dibenzocycloalkenimine	uncompetitive NMDAR antagonist	PCP-site (ion channel)	CN1C2CC3=CC=CC=C3C1(C)C1=CC=CC=C21	CN1C2Cc3c(C1(C)c1c2cccc1)cccc3	610, 37 nM Ki		MK-801(610 val), TCP	Elhallaoui et al., 2003. Linders et al., 1993. Thompson et al., 1990.
1,9,16-trimethyl-16-azatetracyclo[7.6.1.0^(2,7).0^(10,15)]hexadeca-2,4,6,10,12,14-hexaene			C18H19N			dibenzocycloalkenimine	uncompetitive NMDAR antagonist	PCP-site (ion channel)	CN1C2(C)CC3=CC=CC=C3C1(C)C1=CC=CC=C21	CN1C2(C)Cc3c(C1(C)c1c2cccc1)cccc3	710 nM Ki		MK-801	Elhallaoui et al., 2003. Thompson et al., 1990.
1-methyl-16-azatetracyclo[7.6.1.0^(2,7).0^(10,15)]hexadeca-2,4,6,10,12,14-hexaen-16-ol			C16H15NO			dibenzocycloalkenimine	uncompetitive NMDAR antagonist	PCP-site (ion channel)	CC12N(O)C(CC3=CC=CC=C13)C1=CC=CC=C21	ON1C2Cc3c(C1(C)c1c2cccc1)cccc3	19,000 nM Ki		MK-801	Elhallaoui et al., 2003. Thompson et al., 1990.
1-ethyl-16-azatetracyclo[7.6.1.0^(2,7).0^(10,15)]hexadeca-2,4,6,10,12,14-hexaene			C17H17N			dibenzocycloalkenimine	uncompetitive NMDAR antagonist	PCP-site (ion channel)	CCC12NC(CC3=CC=CC=C13)C1=CC=CC=C21	CCC12NC(c3c2cccc3)Cc2c1cccc2	45 nM Ki		MK-801	Elhallaoui et al., 2003. Thompson et al., 1990.
16-ethyl-16-azatetracyclo[7.6.1.0^(2,7).0^(10,15)]hexadeca-2,4,6,10,12,14-hexaene			C17H17N			dibenzocycloalkenimine	uncompetitive NMDAR antagonist	PCP-site (ion channel)	CCN1C2CC3=CC=CC=C3C1C1=CC=CC=C21	CCN1C2Cc3c(C1c1c2cccc1)cccc3	24,000 nM Ki		MK-801	Elhallaoui et al., 2003. Thompson et al., 1990.
ethyl 2-{9-hydroxy-16-azatetracyclo[7.6.1.0^(2,7).0^(10,15)]hexadeca-2,4,6,10,12,14-hexaen-1-yl}acetate			C19H19NO3			dibenzocycloalkenimine	uncompetitive NMDAR antagonist	PCP-site (ion channel)	CCOC(=O)CC12NC(O)(CC3=CC=CC=C13)C1=CC=CC=C21	CCOC(=O)CC12NC(c3c2cccc3)(O)Cc2c1cccc2	3600 nM Ki		MK-801	Elhallaoui et al., 2003. Thompson et al., 1990.
2-{16-azatetracyclo[7.6.1.0^(2,7).0^(10,15)]hexadeca-2,4,6,10,12,14-hexaen-1-yl}ethan-1-ol			C17H17NO			dibenzocycloalkenimine	uncompetitive NMDAR antagonist	PCP-site (ion channel)	OCCC12NC(CC3=CC=CC=C13)C1=CC=CC=C21	OCCC12NC(c3c2cccc3)Cc2c1cccc2	260 nM Ki		MK-801	Elhallaoui et al., 2003. Thompson et al., 1990.
ethyl 2-{16-azatetracyclo[7.6.1.0^(2,7).0^(10,15)]hexadeca-2,4,6,10,12,14-hexaen-1-yl}acetate			C19H19NO2			dibenzocycloalkenimine	uncompetitive NMDAR antagonist	PCP-site (ion channel)	CCOC(=O)CC12NC(CC3=CC=CC=C13)C1=CC=CC=C21	CCOC(=O)CC12NC(c3c2cccc3)Cc2c1cccc2	550 nM Ki		MK-801	Elhallaoui et al., 2003. Thompson et al., 1990.
1-[(1S)-16-azatetracyclo[7.6.1.0^(2,7).0^(10,15)]hexadeca-2,4,6,10,12,14-hexaen-1-yl]ethan-1,2-diol			C17H17NO2			dibenzocycloalkenimine	uncompetitive NMDAR antagonist	PCP-site (ion channel)	OCC(O)[C@]12NC(CC3=CC=CC=C13)C1=CC=CC=C21	OCC([C@]12NC(c3c2cccc3)Cc2c1cccc2)O	320 nM Ki		MK-801	Elhallaoui et al., 2003. Thompson et al., 1990.
{16-azatetracyclo[7.6.1.0^(2,7).0^(10,15)]hexadeca-2,4,6,10,12,14-hexaen-1-yl}methanol			C16H15NO			dibenzocycloalkenimine	uncompetitive NMDAR antagonist	PCP-site (ion channel)	OCC12NC(CC3=CC=CC=C13)C1=CC=CC=C21	OCC12NC(c3c2cccc3)Cc2c1cccc2	350 nM Ki		MK-801	Elhallaoui et al., 2003. Thompson et al., 1990.
1-(fluoromethyl)-16-azatetracyclo[7.6.1.0^(2,7).0^(10,15)]hexadeca-2,4,6,10,12,14-hexaene			C16H14FN			dibenzocycloalkenimine	uncompetitive NMDAR antagonist	PCP-site (ion channel)	FCC12NC(CC3=CC=CC=C13)C1=CC=CC=C21	FCC12NC(c3c2cccc3)Cc2c1cccc2	160 nM Ki		MK-801	Elhallaoui et al., 2003. Thompson et al., 1990.
1-(2-fluoroethyl)-16-azatetracyclo[7.6.1.0^(2,7).0^(10,15)]hexadeca-2,4,6,10,12,14-hexaene			C17H16FN			dibenzocycloalkenimine	uncompetitive NMDAR antagonist	PCP-site (ion channel)	FCCC12NC(CC3=CC=CC=C13)C1=CC=CC=C21	FCCC12NC(c3c2cccc3)Cc2c1cccc2	174 nM Ki		MK-801	Elhallaoui et al., 2003. Thompson et al., 1990.
1-methyl-16-azatetracyclo[7.6.1.0^(2,7).0^(10,15)]hexadeca-2,4,6,10,12,14-hexaen-9-ol			C16H15NO			dibenzocycloalkenimine	uncompetitive NMDAR antagonist	PCP-site (ion channel)	CC12NC(O)(CC3=CC=CC=C13)C1=CC=CC=C21	CC12NC(c3c2cccc3)(O)Cc2c1cccc2	77 nM Ki		MK-801	Elhallaoui et al., 2003. Thompson et al., 1990.
9-fluoro-1-methyl-16-azatetracyclo[7.6.1.0^(2,7).0^(10,15)]hexadeca-2,4,6,10,12,14-hexaene			C16H14FN			dibenzocycloalkenimine	uncompetitive NMDAR antagonist	PCP-site (ion channel)	CC12NC(F)(CC3=CC=CC=C13)C1=CC=CC=C21	CC12NC(c3c2cccc3)(F)Cc2c1cccc2	930 nM Ki		MK-801	Elhallaoui et al., 2003. Thompson et al., 1990.
1-ethenyl-16-azatetracyclo[7.6.1.0^(2,7).0^(10,15)]hexadeca-2,4,6,10,12,14-hexaene			C17H15N			dibenzocycloalkenimine	uncompetitive NMDAR antagonist	PCP-site (ion channel)	C=CC12NC(CC3=CC=CC=C13)C1=CC=CC=C21	C=CC12NC(c3c2cccc3)Cc2c1cccc2	87 nM Ki		MK-801	Elhallaoui et al., 2003. Thompson et al., 1990.
2-{9-hydroxy-16-azatetracyclo[7.6.1.0^(2,7).0^(10,15)]hexadeca-2,4,6,10,12,14-hexaen-1-yl}acetamide			C17H16N2O2			dibenzocycloalkenimine	uncompetitive NMDAR antagonist	PCP-site (ion channel)	NC(=O)CC12NC(O)(CC3=CC=CC=C13)C1=CC=CC=C21	NC(=O)CC12NC(c3c2cccc3)(O)Cc2c1cccc2	6400 nM Ki		MK-801	Elhallaoui et al., 2003. Thompson et al., 1990.
13-chloro-1-methyl-16-azatetracyclo[7.6.1.0^(2,7).0^(10,15)]hexadeca-2,4,6,10,12,14-hexaene			C16H14ClN			dibenzocycloalkenimine	uncompetitive NMDAR antagonist	PCP-site (ion channel)	CC12NC(CC3=CC=CC=C13)C1=CC=C(Cl)C=C21	Clc1ccc2c(c1)C1(C)NC2Cc2c1cccc2	84 nM Ki		MK-801	Elhallaoui et al., 2003. Thompson et al., 1990.
4-chloro-1-methyl-16-azatetracyclo[7.6.1.0^(2,7).0^(10,15)]hexadeca-2,4,6,10,12,14-hexaene			C16H14ClN			dibenzocycloalkenimine	uncompetitive NMDAR antagonist	PCP-site (ion channel)	CC12NC(CC3=CC=C(Cl)C=C13)C1=CC=CC=C21	Clc1ccc2c(c1)C1(C)NC(C2)c2c1cccc2	11 nM Ki		MK-801	Elhallaoui et al., 2003. Thompson et al., 1990.
13-bromo-1-methyl-16-azatetracyclo[7.6.1.0^(2,7).0^(10,15)]hexadeca-2,4,6,10,12,14-hexaene			C16H14BrN			dibenzocycloalkenimine	uncompetitive NMDAR antagonist	PCP-site (ion channel)	CC12NC(CC3=CC=CC=C13)C1=CC=C(Br)C=C21	Brc1ccc2c(c1)C1(C)NC2Cc2c1cccc2	180 nM Ki		MK-801	Elhallaoui et al., 2003. Thompson et al., 1990.
13-methoxy-1-methyl-16-azatetracyclo[7.6.1.0^(2,7).0^(10,15)]hexadeca-2,4,6,10,12,14-hexaene			C17H17NO			dibenzocycloalkenimine	uncompetitive NMDAR antagonist	PCP-site (ion channel)	COC1=CC=C2C3CC4=CC=CC=C4C(C)(N3)C2=C1	COc1ccc2c(c1)C1(C)NC2Cc2c1cccc2	36 nM Ki		MK-801	Elhallaoui et al., 2003. Thompson et al., 1990.
1-methyl-16-azatetracyclo[7.6.1.0^(2,7).0^(10,15)]hexadeca-2,4,6,10,12,14-hexaen-13-ol			C16H15NO			dibenzocycloalkenimine	uncompetitive NMDAR antagonist	PCP-site (ion channel)	CC12NC(CC3=CC=CC=C13)C1=CC=C(O)C=C21	Oc1ccc2c(c1)C1(C)NC2Cc2c1cccc2	23 nM Ki		MK-801	Elhallaoui et al., 2003. Thompson et al., 1990.
1-methyl-16-azatetracyclo[7.6.1.0^(2,7).0^(10,15)]hexadeca-2,4,6,10,12,14-hexaen-4-amine			C16H16N2			dibenzocycloalkenimine	uncompetitive NMDAR antagonist	PCP-site (ion channel)	CC12NC(CC3=CC=C(N)C=C13)C1=CC=CC=C21	Nc1ccc2c(c1)C1(C)NC(C2)c2c1cccc2	27 nM Ki		MK-801	Elhallaoui et al., 2003. Thompson et al., 1990.
4-bromo-1-methyl-16-azatetracyclo[7.6.1.0^(2,7).0^(10,15)]hexadeca-2,4,6,10,12,14-hexaene			C16H14BrN			dibenzocycloalkenimine	uncompetitive NMDAR antagonist	PCP-site (ion channel)	CC12NC(CC3=CC=C(Br)C=C13)C1=CC=CC=C21	Brc1ccc2c(c1)C1(C)NC(C2)c2c1cccc2	80 nM Ki		MK-801	Elhallaoui et al., 2003. Thompson et al., 1990.
4-iodo-1-methyl-16-azatetracyclo[7.6.1.0^(2,7).0^(10,15)]hexadeca-2,4,6,10,12,14-hexaene			C16H14IN			dibenzocycloalkenimine	uncompetitive NMDAR antagonist	PCP-site (ion channel)	CC12NC(CC3=CC=C(I)C=C13)C1=CC=CC=C21	Ic1ccc2c(c1)C1(C)NC(C2)c2c1cccc2	11 nM Ki		MK-801	Elhallaoui et al., 2003. Thompson et al., 1990.
4-methoxy-1-methyl-16-azatetracyclo[7.6.1.0^(2,7).0^(10,15)]hexadeca-2,4,6,10,12,14-hexaene			C17H17NO			dibenzocycloalkenimine	uncompetitive NMDAR antagonist	PCP-site (ion channel)	COC1=CC=C2CC3NC(C)(C4=CC=CC=C34)C2=C1	COc1ccc2c(c1)C1(C)NC(C2)c2c1cccc2	46 nM Ki		MK-801	Elhallaoui et al., 2003. Thompson et al., 1990.
1-methyl-16-azatetracyclo[7.6.1.0^(2,7).0^(10,15)]hexadeca-2,4,6,10,12,14-hexaen-4-ol			C16H15NO			dibenzocycloalkenimine	uncompetitive NMDAR antagonist	PCP-site (ion channel)	CC12NC(CC3=CC=C(O)C=C13)C1=CC=CC=C21	Oc1ccc2c(c1)C1(C)NC(C2)c2c1cccc2	18 nM Ki		MK-801	Elhallaoui et al., 2003. Thompson et al., 1990.
{1-methyl-16-azatetracyclo[7.6.1.0^(2,7).0^(10,15)]hexadeca-2,4,6,10,12,14-hexaen-4-yl}methanol			C17H17NO			dibenzocycloalkenimine	uncompetitive NMDAR antagonist	PCP-site (ion channel)	CC12NC(CC3=CC=C(CO)C=C13)C1=CC=CC=C21	OCc1ccc2c(c1)C1(C)NC(C2)c2c1cccc2	137 nM Ki		MK-801	Elhallaoui et al., 2003. Thompson et al., 1990.
1,4-dimethyl-16-azatetracyclo[7.6.1.0^(2,7).0^(10,15)]hexadeca-2,4,6,10,12,14-hexaene			C17H17N			dibenzocycloalkenimine	uncompetitive NMDAR antagonist	PCP-site (ion channel)	CC1=CC=C2CC3NC(C)(C4=CC=CC=C34)C2=C1	Cc1ccc2c(c1)C1(C)NC(C2)c2c1cccc2	34 nM Ki		MK-801	Elhallaoui et al., 2003. Thompson et al., 1990.
4-butyl-1-methyl-16-azatetracyclo[7.6.1.0^(2,7).0^(10,15)]hexadeca-2,4,6,10,12,14-hexaene			C20H23N			dibenzocycloalkenimine	uncompetitive NMDAR antagonist	PCP-site (ion channel)	CCCCC1=CC=C2CC3NC(C)(C4=CC=CC=C34)C2=C1	CCCCc1ccc2c(c1)C1(C)NC(C2)c2c1cccc2	1250 nM Ki		MK-801	Elhallaoui et al., 2003. Thompson et al., 1990.
1-methyl-4-phenyl-16-azatetracyclo[7.6.1.0^(2,7).0^(10,15)]hexadeca-2,4,6,10,12,14-hexaene			C22H19N			dibenzocycloalkenimine	uncompetitive NMDAR antagonist	PCP-site (ion channel)	CC12NC(CC3=CC=C(C=C13)C1=CC=CC=C1)C1=CC=CC=C21	CC12NC(c3c2cccc3)Cc2c1cc(cc2)c1ccccc1	32 nM Ki		MK-801	Elhallaoui et al., 2003. Thompson et al., 1990.
5-methoxy-1-methyl-16-azatetracyclo[7.6.1.0^(2,7).0^(10,15)]hexadeca-2,4,6,10,12,14-hexaene			C17H17NO			dibenzocycloalkenimine	uncompetitive NMDAR antagonist	PCP-site (ion channel)	COC1=CC=C2C(CC3NC2(C)C2=CC=CC=C32)=C1	COc1ccc2c(c1)CC1NC2(C)c2c1cccc2	610 nM Ki		MK-801	Elhallaoui et al., 2003. Thompson et al., 1990.
12-methoxy-1-methyl-16-azatetracyclo[7.6.1.0^(2,7).0^(10,15)]hexadeca-2,4,6,10,12,14-hexaene			C17H17NO			dibenzocycloalkenimine	uncompetitive NMDAR antagonist	PCP-site (ion channel)	COC1=CC=C2C(=C1)C1CC3=CC=CC=C3C2(C)N1	COc1ccc2c(c1)C1Cc3c(C2(N1)C)cccc3	33 nM Ki		MK-801	Elhallaoui et al., 2003. Thompson et al., 1990.
1-methyl-16-azatetracyclo[7.6.1.0^(2,7).0^(10,15)]hexadeca-2,4,6,10,12,14-hexaen-5-ol			C16H15NO			dibenzocycloalkenimine	uncompetitive NMDAR antagonist	PCP-site (ion channel)	CC12NC(CC3=CC(O)=CC=C13)C1=CC=CC=C21	Oc1ccc2c(c1)CC1NC2(C)c2c1cccc2	277 nM Ki		MK-801	Elhallaoui et al., 2003. Thompson et al., 1990.
1-methyl-16-azatetracyclo[7.6.1.0^(2,7).0^(10,15)]hexadeca-2,4,6,10,12,14-hexaen-12-ol			C16H15NO			dibenzocycloalkenimine	uncompetitive NMDAR antagonist	PCP-site (ion channel)	CC12NC(CC3=CC=CC=C13)C1=CC(O)=CC=C21	Oc1ccc2c(c1)C1Cc3c(C2(N1)C)cccc3	49 nM Ki		MK-801	Elhallaoui et al., 2003. Thompson et al., 1990.
4,13-difluoro-1-methyl-16-azatetracyclo[7.6.1.0^(2,7).0^(10,15)]hexadeca-2,4,6,10,12,14-hexaene			C16H13F2N			dibenzocycloalkenimine	uncompetitive NMDAR antagonist	PCP-site (ion channel)	CC12NC(CC3=CC=C(F)C=C13)C1=CC=C(F)C=C21	Fc1ccc2c(c1)C1(C)NC(C2)c2c1cc(F)cc2	31 nM Ki		MK-801	Elhallaoui et al., 2003. Thompson et al., 1990.
N‐methyl‐2,3,4,4a,9,9a‐hexahydro‐1H‐fluoren‐4a‐amine			C14H19N	racemic		hexahydrofluorenamine	uncompetitive NMDAR antagonist	PCP-site (ion channel)	CNC12CCCCC1CC1=C2C=CC=C1	CNC12CCCCC1Cc1c2cccc1		30	TCP	Hays et al., 1993
(4aS,9aR)-N‐methyl‐2,3,4,4a,9,9a‐hexahydro‐1H‐fluoren‐4a‐amine			C14H19N	(-)		hexahydrofluorenamine	uncompetitive NMDAR antagonist	PCP-site (ion channel)	[H][C@@]12CC3=C(C=CC=C3)[C@@]1(CCCC2)NC	CN[C@@]12CCCC[C@@H]1Cc1c2cccc1		9.9	TCP	Hays et al., 1993
(4aR,9aS)-N‐methyl‐2,3,4,4a,9,9a‐hexahydro‐1H‐fluoren‐4a‐amine			C14H19N	(+)		hexahydrofluorenamine	uncompetitive NMDAR antagonist	PCP-site (ion channel)	[H][C@]12CC3=C(C=CC=C3)[C@]1(CCCC2)NC	CN[C@]12CCCC[C@H]1Cc1c2cccc1		107	TCP	Hays et al., 1993
(4aR,9aS)‐2,3,4,4a,9,9a‐hexahydro‐1H‐fluoren‐4a‐amine			C13H17N	(+)		hexahydrofluorenamine	uncompetitive NMDAR antagonist	PCP-site (ion channel)	[H][C@]12CC3=C(C=CC=C3)[C@@]1(N)CCCC2	N[C@]12CCCC[C@H]1Cc1c2cccc1		13.4, 19	TCP, MK-801 (19 val)	Hays et al., 1993. Kozikowski & Pang, 1990.
(4aR,9aS)-N‐ethyl‐2,3,4,4a,9,9a‐hexahydro‐1H‐fluoren‐4a‐amine			C15H21N	(+)		hexahydrofluorenamine	uncompetitive NMDAR antagonist	PCP-site (ion channel)	[H][C@]12CC3=C(C=CC=C3)[C@]1(CCCC2)NCC	CCN[C@]12CCCC[C@H]1Cc1c2cccc1		55.2, 68	TCP, MK-801 (68 val)	Hays et al., 1993. Kozikowski & Pang, 1990.
N‐benzyl‐6‐methoxy‐2,3,4,4a,9,9a‐hexahydro‐1H‐fluoren‐4a‐amine			C21H25NO			hexahydrofluorenamine	uncompetitive NMDAR antagonist	PCP-site (ion channel)	COC1=CC2=C(CC3CCCCC23NCC2=CC=CC=C2)C=C1	COc1ccc2c(c1)C1(CCCCC1C2)NCc1ccccc1		492	TCP	Hays et al., 1993
N‐{1H,2H,3H,3aH,8H,8aH‐cyclopenta[a]inden‐3a‐yl}methanamine			C13H17N			hexahydrofluorenamine	uncompetitive NMDAR antagonist	PCP-site (ion channel)	CNC12CCCC1CC1=C2C=CC=C1	CNC12CCCC1Cc1c2cccc1		350	TCP	Hays et al., 1993
N‐{4bH,5H,6H,7H,8H,9H,9aH,10H‐benzo[a]azulen‐4b‐yl}methanamine			C15H21N			hexahydrofluorenamine	uncompetitive NMDAR antagonist	PCP-site (ion channel)	CNC12CCCCCC1CC1=C2C=CC=C1	CNC12CCCCCC1Cc1c2cccc1		113	TCP	Hays et al., 1993
N,4‐dimethyl‐2,3,4,4a,9,9a‐hexahydro‐1H‐fluoren‐4a‐amine			C15H21N			hexahydrofluorenamine	uncompetitive NMDAR antagonist	PCP-site (ion channel)	CNC12C(CC3=C1C=CC=C3)CCCC2C	CNC12C(C)CCCC1Cc1c2cccc1		79	TCP	Hays et al., 1993
N,2‐dimethyl‐2,3,4,4a,9,9a‐hexahydro‐1H‐fluoren‐4a‐amine			C15H21N			hexahydrofluorenamine	uncompetitive NMDAR antagonist	PCP-site (ion channel)	CNC12CCC(C)CC1CC1=C2C=CC=C1	CNC12CCC(CC1Cc1c2cccc1)C		95	TCP	Hays et al., 1993
6‐methoxy‐N‐methyl‐2,3,4,4a,9,9a‐hexahydro‐1H‐fluoren‐4a‐amine			C15H21NO			hexahydrofluorenamine	uncompetitive NMDAR antagonist	PCP-site (ion channel)	CNC12CCCCC1CC1=C2C=C(OC)C=C1	CNC12CCCCC1Cc1c2cc(OC)cc1		22	TCP	Hays et al., 1993
4a‐(methylamino)‐2,3,4,4a,9,9a‐hexahydro‐1H‐fluoren‐6‐ol			C14H19NO			hexahydrofluorenamine	uncompetitive NMDAR antagonist	PCP-site (ion channel)	CNC12CCCCC1CC1=C2C=C(O)C=C1	CNC12CCCCC1Cc1c2cc(O)cc1		16.5	TCP	Hays et al., 1993
4bH,5H,6H,7H,8H,9H,9aH,10H‐benzo[a]azulen‐4b‐amine			C14H19N			hexahydrofluorenamine	uncompetitive NMDAR antagonist	PCP-site (ion channel)	NC12CCCCCC1CC1=C2C=CC=C1	NC12CCCCCC1Cc1c2cccc1		304	TCP	Hays et al., 1993
4‐methyl‐2,3,4,4a,9,9a‐hexahydro‐1H‐fluoren‐4a‐amine			C14H19N			hexahydrofluorenamine	uncompetitive NMDAR antagonist	PCP-site (ion channel)	CC1CCCC2CC3=CC=CC=C3C12N	CC1CCCC2C1(N)c1ccccc1C2		159	TCP	Hays et al., 1993
N‐ethyl‐4‐methyl‐2,3,4,4a,9,9a‐hexahydro‐1H‐fluoren‐4a‐amine			C16H23N			hexahydrofluorenamine	uncompetitive NMDAR antagonist	PCP-site (ion channel)	CCNC12C(CC3=CC=CC=C13)CCCC2C	CCNC12C(C)CCCC1Cc1c2cccc1		323	TCP	Hays et al., 1993
N-ethyl-8-oxatricyclo[7.4.0.0^(2,7)]trideca-2,4,6-trien-1-amine			C14H19NO			hexahydrofluorenamine	uncompetitive NMDAR antagonist	PCP-site (ion channel)	CCNC12CCCCC1OC1=CC=CC=C21	CCNC12CCCCC1Oc1c2cccc1		141	TCP	Hays et al., 1993
N-methyl-8-thiatricyclo[7.4.0.0^(2,7)]trideca-2,4,6-trien-1-amine	PD 45602		C13H17NS			hexahydrofluorenamine	uncompetitive NMDAR antagonist	PCP-site (ion channel)	CNC12CCCCC1SC1=CC=CC=C21	CNC12CCCCC1Sc1c2cccc1		11.3	TCP	Hays et al., 1993. Bigge et al., 1993.
N‐methyl‐9‐methylidene‐2,3,4,4a,9,9a‐hexahydro‐1H‐fluoren‐4a‐amine			C15H19N			hexahydrofluorenamine	uncompetitive NMDAR antagonist	PCP-site (ion channel)	CNC12CCCCC1C(=C)C1=CC=CC=C21	CNC12CCCCC1C(=C)c1c2cccc1		528	TCP	Hays et al., 1993
(2S,4aR,9aS)‐2‐(aminomethyl)‐N‐methyl‐2,3,4,4a,9,9a‐hexahydro‐1H‐fluoren‐4a‐amine			C15H22N2			hexahydrofluorenamine	uncompetitive NMDAR antagonist	PCP-site (ion channel)	[H][C@]12CC3=CC=CC=C3[C@]1(CC[C@]([H])(CN)C2)NC	NC[C@H]1CC[C@]2([C@@H](C1)Cc1c2cccc1)NC		765	TCP	Hays et al., 1993
(4a‐amino‐2,3,4,4a,9,9a‐hexahydro‐1H‐fluoren‐2‐yl)methanol			C14H19NO			hexahydrofluorenamine	uncompetitive NMDAR antagonist	PCP-site (ion channel)	NC12CCC(CO)CC1CC1=CC=CC=C21	OCC1CCC2(C(C1)Cc1c2cccc1)N		253	TCP	Hays et al., 1993
[4a‐(methylamino)‐2,3,4,4a,9,9a‐hexahydro‐1H‐fluoren‐2‐yl]methanol			C15H21NO			hexahydrofluorenamine	uncompetitive NMDAR antagonist	PCP-site (ion channel)	CNC12CCC(CO)CC1CC1=CC=CC=C21	OCC1CCC2(C(C1)Cc1c2cccc1)NC		3935	TCP	Hays et al., 1993
1-(3-Hydroxyphenyl)-N-methylcyclohexanamine	3-HO-PCMe		C13H19NO			arylcyclohexylamine	uncompetitive NMDAR antagonist	PCP-site (ion channel)	CNC1(CCCCC1)C1=CC(O)=CC=C1	CNC1(CCCCC1)c1cccc(c1)O		422		Wallach & Brandt, 2018
1-(3-Hydroxyphenyl)-N-propylcyclohexanamine	3-HO-PCPr		C15H23NO			arylcyclohexylamine	uncompetitive NMDAR antagonist	PCP-site (ion channel)	CCCNC1(CCCCC1)C1=CC(O)=CC=C1	CCCNC1(CCCCC1)c1cccc(c1)O		39		Wallach & Brandt, 2018
N-ethyl-1-(3-methylphenyl)cyclohexan-1-amine	3-Me-PCE		C15H23N			arylcyclohexylamine	uncompetitive NMDAR antagonist	PCP-site (ion channel)	CCNC1(CCCCC1)C1=CC=CC(C)=C1	CCNC1(CCCCC1)c1cccc(c1)C	43.1 nM Ki	67.6	MK-801	Wallach & Brandt, 2018. Wallach, 2014.
N-methyl-1-(3-methylphenyl)cyclohexan-1-amine	3-Me-PCMe		C14H21N			arylcyclohexylamine	uncompetitive NMDAR antagonist	PCP-site (ion channel)	CNC1(CCCCC1)C1=CC(C)=CC=C1	CNC1(CCCCC1)c1cccc(c1)C	134.8 nM Ki	211.6	MK-801	Wallach & Brandt, 2018. Wallach, 2014.
1-(3-methylphenyl)-N-propylcyclohexan-1-amine	3-Me-PCPr		C16H25N			arylcyclohexylamine	uncompetitive NMDAR antagonist	PCP-site (ion channel)	CCCNC1(CCCCC1)C1=CC(C)=CC=C1	CCCNC1(CCCCC1)c1cccc(c1)C	53.5 nM Ki	84	MK-801	Wallach & Brandt, 2018. Wallach, 2014.
N‐(3‐ethylphenyl)‐N'‐phenylguanidine			C15H17N3			guanidine	uncompetitive NMDAR antagonist	PCP-site (ion channel)	CCC1=CC(NC(=N)NC2=CC=CC=C2)=CC=C1	CCc1cccc(c1)NC(=N)Nc1ccccc1	722-732		MK-801	Hu et al., 1997
N‐(3‐ethylphenyl)-N-methyl‐N'‐phenylguanidine			C16H19N3			guanidine	uncompetitive NMDAR antagonist	PCP-site (ion channel)	CCC1=CC(=CC=C1)N(C)C(=N)NC1=CC=CC=C1	CCc1cccc(c1)N(C(=N)Nc1ccccc1)C	4466-4470		MK-801	Hu et al., 1997
N'‐(2‐chlorophenyl)‐N‐(3‐ethylphenyl)guanidine			C15H16ClN3			guanidine	uncompetitive NMDAR antagonist	PCP-site (ion channel)	CCC1=CC(NC(=N)NC2=C(Cl)C=CC=C2)=CC=C1	CCc1cccc(c1)NC(=N)Nc1ccccc1Cl	249		MK-801	Hu et al., 1997
N'‐(2‐chlorophenyl)‐N‐(3‐ethylphenyl)-N-methylguanidine			C16H18ClN3			guanidine	uncompetitive NMDAR antagonist	PCP-site (ion channel)	CCC1=CC(=CC=C1)N(C)C(=N)NC1=C(Cl)C=CC=C1	CCc1cccc(c1)N(C(=N)Nc1ccccc1Cl)C	386		MK-801	Hu et al., 1997
N'‐(3‐chlorophenyl)‐N‐(3‐ethylphenyl)guanidine			C15H16ClN3			guanidine	uncompetitive NMDAR antagonist	PCP-site (ion channel)	CCC1=CC(NC(=N)NC2=CC(Cl)=CC=C2)=CC=C1	CCc1cccc(c1)NC(=N)Nc1cccc(c1)Cl	112		MK-801	Hu et al., 1997
N'‐(3‐chlorophenyl)‐N‐(3‐ethylphenyl)-N-methylguanidine			C16H18ClN3			guanidine	uncompetitive NMDAR antagonist	PCP-site (ion channel)	CCC1=CC(=CC=C1)N(C)C(=N)NC1=CC(Cl)=CC=C1	CCc1cccc(c1)N(C(=N)Nc1cccc(c1)Cl)C	497		MK-801	Hu et al., 1997
N'‐(4‐chlorophenyl)‐N‐(3‐ethylphenyl)guanidine			C15H16ClN3			guanidine	uncompetitive NMDAR antagonist	PCP-site (ion channel)	CCC1=CC(NC(=N)NC2=CC=C(Cl)C=C2)=CC=C1	CCc1cccc(c1)NC(=N)Nc1ccc(cc1)Cl	738		MK-801	Hu et al., 1997
N'‐(4‐chlorophenyl)‐N‐(3‐ethylphenyl)-N-methylguanidine			C16H18ClN3			guanidine	uncompetitive NMDAR antagonist	PCP-site (ion channel)	CCC1=CC(=CC=C1)N(C)C(=N)NC1=CC=C(Cl)C=C1	CCc1cccc(c1)N(C(=N)Nc1ccc(cc1)Cl)C	3338		MK-801	Hu et al., 1997
N'‐(2,3‐dichlorophenyl)‐N‐(3‐ethylphenyl)guanidine			C15H15Cl2N3			guanidine	uncompetitive NMDAR antagonist	PCP-site (ion channel)	CCC1=CC(NC(=N)NC2=C(Cl)C(Cl)=CC=C2)=CC=C1	CCc1cccc(c1)NC(=N)Nc1cccc(c1Cl)Cl	156		MK-801	Hu et al., 1997
N'‐(2,3‐dichlorophenyl)‐N‐(3‐ethylphenyl)‐N‐methylguanidine			C16H17Cl2N3			guanidine	uncompetitive NMDAR antagonist	PCP-site (ion channel)	CCC1=CC(=CC=C1)N(C)C(=N)NC1=C(Cl)C(Cl)=CC=C1	CCc1cccc(c1)N(C(=N)Nc1cccc(c1Cl)Cl)C	116		MK-801	Hu et al., 1997
N'‐(2,4‐dichlorophenyl)‐N‐(3‐ethylphenyl)guanidine			C15H15Cl2N3			guanidine	uncompetitive NMDAR antagonist	PCP-site (ion channel)	CCC1=CC(NC(=N)NC2=C(Cl)C=C(Cl)C=C2)=CC=C1	CCc1cccc(c1)NC(=N)Nc1ccc(cc1Cl)Cl	140		MK-801	Hu et al., 1997
N'‐(2,5‐dichlorophenyl)‐N‐(3‐ethylphenyl)guanidine			C15H15Cl2N3			guanidine	uncompetitive NMDAR antagonist	PCP-site (ion channel)	CCC1=CC(NC(=N)NC2=C(Cl)C=CC(Cl)=C2)=CC=C1	CCc1cccc(c1)NC(=N)Nc1cc(Cl)ccc1Cl	68		MK-801	Hu et al., 1997
N'‐(2,5‐dichlorophenyl)‐N‐(3‐ethylphenyl)‐N‐methylguanidine			C16H17Cl2N3			guanidine	uncompetitive NMDAR antagonist	PCP-site (ion channel)	CCC1=CC(=CC=C1)N(C)C(=N)NC1=C(Cl)C=CC(Cl)=C1	CCc1cccc(c1)N(C(=N)Nc1cc(Cl)ccc1Cl)C	65		MK-801	Hu et al., 1997
N'‐(2,6‐dichlorophenyl)‐N‐(3‐ethylphenyl)guanidine			C15H15Cl2N3			guanidine	uncompetitive NMDAR antagonist	PCP-site (ion channel)	CCC1=CC(NC(=N)NC2=C(Cl)C=CC=C2Cl)=CC=C1	CCc1cccc(c1)NC(=N)Nc1c(Cl)cccc1Cl	133		MK-801	Hu et al., 1997
N'‐(3,4‐dichlorophenyl)‐N‐(3‐ethylphenyl)guanidine			C15H15Cl2N3			guanidine	uncompetitive NMDAR antagonist	PCP-site (ion channel)	CCC1=CC(NC(=N)NC2=CC(Cl)=C(Cl)C=C2)=CC=C1	CCc1cccc(c1)NC(=N)Nc1ccc(c(c1)Cl)Cl	204		MK-801	Hu et al., 1997
N'‐(3,4‐dichlorophenyl)‐N‐(3‐ethylphenyl)‐N‐methylguanidine			C16H17Cl2N3			guanidine	uncompetitive NMDAR antagonist	PCP-site (ion channel)	CCC1=CC(=CC=C1)N(C)C(=N)NC1=CC(Cl)=C(Cl)C=C1	CCc1cccc(c1)N(C(=N)Nc1ccc(c(c1)Cl)Cl)C	1280		MK-801	Hu et al., 1997
N'‐(3,5‐dichlorophenyl)‐N‐(3‐ethylphenyl)guanidine			C15H15Cl2N3			guanidine	uncompetitive NMDAR antagonist	PCP-site (ion channel)	CCC1=CC(NC(=N)NC2=CC(Cl)=CC(Cl)=C2)=CC=C1	CCc1cccc(c1)NC(=N)Nc1cc(Cl)cc(c1)Cl	115		MK-801	Hu et al., 1997
N'‐(2‐bromophenyl)‐N‐(3‐ethylphenyl)‐N‐methylguanidine			C16H18BrN3			guanidine	uncompetitive NMDAR antagonist	PCP-site (ion channel)	CCC1=CC(=CC=C1)N(C)C(=N)NC1=C(Br)C=CC=C1	CCc1cccc(c1)N(C(=N)Nc1ccccc1Br)C	265		MK-801	Hu et al., 1997
N‐(3‐ethylphenyl)‐N'‐(2‐iodophenyl)‐N‐methylguanidine			C16H18IN3			guanidine	uncompetitive NMDAR antagonist	PCP-site (ion channel)	CCC1=CC(=CC=C1)N(C)C(=N)NC1=C(I)C=CC=C1	CCc1cccc(c1)N(C(=N)Nc1ccccc1I)C	101		MK-801	Hu et al., 1997
N‐(3‐ethylphenyl)‐N'‐(2‐methylphenyl)guanidine			C16H19N3			guanidine	uncompetitive NMDAR antagonist	PCP-site (ion channel)	CCC1=CC(NC(=N)NC2=C(C)C=CC=C2)=CC=C1	CCc1cccc(c1)NC(=N)Nc1ccccc1C	768		MK-801	Hu et al., 1997
N'‐(2‐ethylphenyl)‐N‐(3‐ethylphenyl)guanidine			C17H21N3			guanidine	uncompetitive NMDAR antagonist	PCP-site (ion channel)	CCC1=CC(NC(=N)NC2=C(CC)C=CC=C2)=CC=C1	CCc1cccc(c1)NC(=N)Nc1ccccc1CC	350		MK-801	Hu et al., 1997
N‐(3‐ethylphenyl)‐N'‐[2‐(propan‐2‐yl)phenyl]guanidine			C18H23N3			guanidine	uncompetitive NMDAR antagonist	PCP-site (ion channel)	CCC1=CC(NC(=N)NC2=C(C=CC=C2)C(C)C)=CC=C1	CCc1cccc(c1)NC(=N)Nc1ccccc1C(C)C	230		MK-801	Hu et al., 1997
N‐(3‐ethylphenyl)‐N‐methyl‐N'‐[2‐(propan‐2‐yl)phenyl]guanidine			C19H25N3			guanidine	uncompetitive NMDAR antagonist	PCP-site (ion channel)	CCC1=CC(=CC=C1)N(C)C(=N)NC1=C(C=CC=C1)C(C)C	CCc1cccc(c1)N(C(=N)Nc1ccccc1C(C)C)C	564		MK-801	Hu et al., 1997
N'‐(3‐bromophenyl)‐N‐(3‐ethylphenyl)guanidine			C15H16BrN3			guanidine	uncompetitive NMDAR antagonist	PCP-site (ion channel)	CCC1=CC(NC(=N)NC2=CC(Br)=CC=C2)=CC=C1	CCc1cccc(c1)NC(=N)Nc1cccc(c1)Br	51		MK-801	Hu et al., 1997
N'‐(3‐bromophenyl)‐N‐(3‐ethylphenyl)‐N‐methylguanidine			C16H18BrN3			guanidine	uncompetitive NMDAR antagonist	PCP-site (ion channel)	CCC1=CC(=CC=C1)N(C)C(=N)NC1=CC(Br)=CC=C1	CCc1cccc(c1)N(C(=N)Nc1cccc(c1)Br)C	81		MK-801	Hu et al., 1997
N,N'‐bis(3‐ethylphenyl)guanidine			C17H21N3			guanidine	uncompetitive NMDAR antagonist	PCP-site (ion channel)	CCC1=CC(NC(=N)NC2=CC(CC)=CC=C2)=CC=C1	CCc1cccc(c1)NC(=N)Nc1cccc(c1)CC	129		MK-801	Hu et al., 1997
N,N'‐bis(3‐ethylphenyl)‐N‐methylguanidine			C18H23N3			guanidine	uncompetitive NMDAR antagonist	PCP-site (ion channel)	CCC1=CC(=CC=C1)N(C)C(=N)NC1=CC(CC)=CC=C1	CCc1cccc(c1)NC(=N)N(c1cccc(c1)CC)C	164		MK-801	Hu et al., 1997
N‐(3‐ethylphenyl)‐N‐methyl‐N'‐[3‐(methylsulfanyl)phenyl]guanidine			C17H21N3S			guanidine	uncompetitive NMDAR antagonist	PCP-site (ion channel)	CCC1=CC(=CC=C1)N(C)C(=N)NC1=CC(SC)=CC=C1	CCc1cccc(c1)N(C(=N)Nc1cccc(c1)SC)C	6.4		MK-801	Hu et al., 1997
N'‐(3,5‐diethyl‐2‐fluorophenyl)‐N‐(3‐ethylphenyl)guanidine			C19H24FN3			guanidine	uncompetitive NMDAR antagonist	PCP-site (ion channel)	CCC1=CC(NC(=N)NC2=C(F)C(CC)=CC(CC)=C2)=CC=C1	CCc1cccc(c1)NC(=N)Nc1cc(CC)cc(c1F)CC	50		MK-801	Hu et al., 1997
N'‐(3,5‐diethyl‐2‐fluorophenyl)‐N‐(3‐ethylphenyl)‐N‐methylguanidine			C20H26FN3			guanidine	uncompetitive NMDAR antagonist	PCP-site (ion channel)	CCC1=CC(=CC=C1)N(C)C(=N)NC1=C(F)C(CC)=CC(CC)=C1	CCc1cccc(c1)N(C(=N)Nc1cc(CC)cc(c1F)CC)C	97		MK-801	Hu et al., 1997
N'‐(2‐chloro‐3,5‐diethylphenyl)‐N‐(3‐ethylphenyl)guanidine			C19H24ClN3			guanidine	uncompetitive NMDAR antagonist	PCP-site (ion channel)	CCC1=CC(NC(=N)NC2=C(Cl)C(CC)=CC(CC)=C2)=CC=C1	CCc1cccc(c1)NC(=N)Nc1cc(CC)cc(c1Cl)CC	35		MK-801	Hu et al., 1997
N'‐(2‐chloro‐3,5‐diethylphenyl)‐N‐(3‐ethylphenyl)-N-methylguanidine			C20H26ClN3			guanidine	uncompetitive NMDAR antagonist	PCP-site (ion channel)	CCC1=CC(=CC=C1)N(C)C(=N)NC1=C(Cl)C(CC)=CC(CC)=C1	CCc1cccc(c1)N(C(=N)Nc1cc(CC)cc(c1Cl)CC)C	41		MK-801	Hu et al., 1997
N'‐(2‐bromo‐3,5‐diethylphenyl)‐N‐(3‐ethylphenyl)guanidine			C19H24BrN3			guanidine	uncompetitive NMDAR antagonist	PCP-site (ion channel)	CCC1=CC(NC(=N)NC2=C(Br)C(CC)=CC(CC)=C2)=CC=C1	CCc1cccc(c1)NC(=N)Nc1cc(CC)cc(c1Br)CC	29		MK-801	Hu et al., 1997
N'‐(2‐bromo‐3,5‐diethylphenyl)‐N‐(3‐ethylphenyl)-N-methylguanidine			C20H26BrN3			guanidine	uncompetitive NMDAR antagonist	PCP-site (ion channel)	CCC1=CC(=CC=C1)N(C)C(=N)NC1=C(Br)C(CC)=CC(CC)=C1	CCc1cccc(c1)N(C(=N)Nc1cc(CC)cc(c1Br)CC)C	13		MK-801	Hu et al., 1997
N'‐[3‐ethyl‐2‐fluoro‐5‐(trifluoromethyl)phenyl]‐N‐(3‐ethylphenyl)guanidine			C18H19F4N3			guanidine	uncompetitive NMDAR antagonist	PCP-site (ion channel)	CCC1=CC(NC(=N)NC2=C(F)C(CC)=CC(=C2)C(F)(F)F)=CC=C1	CCc1cccc(c1)NC(=N)Nc1cc(cc(c1F)CC)C(F)(F)F	76		MK-801	Hu et al., 1997
N'‐[3‐ethyl‐2‐fluoro‐5‐(trifluoromethyl)phenyl]‐N‐(3‐ethylphenyl)-N-methylguanidine			C19H21F4N3			guanidine	uncompetitive NMDAR antagonist	PCP-site (ion channel)	CCC1=CC(=CC=C1)N(C)C(=N)NC1=C(F)C(CC)=CC(=C1)C(F)(F)F	CCc1cccc(c1)N(C(=N)Nc1cc(cc(c1F)CC)C(F)(F)F)C	194		MK-801	Hu et al., 1997
N'‐[2‐chloro‐3‐ethyl‐5‐(trifluoromethyl)phenyl]‐N‐(3‐ethylphenyl)guanidine			C18H19ClF3N3			guanidine	uncompetitive NMDAR antagonist	PCP-site (ion channel)	CCC1=CC(NC(=N)NC2=C(Cl)C(CC)=CC(=C2)C(F)(F)F)=CC=C1	CCc1cccc(c1)NC(=N)Nc1cc(cc(c1Cl)CC)C(F)(F)F	44		MK-801	Hu et al., 1997
N'‐[2‐chloro‐3‐ethyl‐5‐(trifluoromethyl)phenyl]‐N‐(3‐ethylphenyl)‐N‐methylguanidine			C19H21ClF3N3			guanidine	uncompetitive NMDAR antagonist	PCP-site (ion channel)	CCC1=CC(=CC=C1)N(C)C(=N)NC1=C(Cl)C(CC)=CC(=C1)C(F)(F)F	CCc1cccc(c1)N(C(=N)Nc1cc(cc(c1Cl)CC)C(F)(F)F)C	101		MK-801	Hu et al., 1997
N'‐[2‐bromo‐3‐ethyl‐5‐(trifluoromethyl)phenyl]‐N‐(3‐ethylphenyl)guanidine			C18H19BrF3N3			guanidine	uncompetitive NMDAR antagonist	PCP-site (ion channel)	CCC1=CC(NC(=N)NC2=C(Br)C(CC)=CC(=C2)C(F)(F)F)=CC=C1	CCc1cccc(c1)NC(=N)Nc1cc(cc(c1Br)CC)C(F)(F)F	67		MK-801	Hu et al., 1997
N'‐[2‐bromo‐3‐ethyl‐5‐(trifluoromethyl)phenyl]‐N‐(3‐ethylphenyl)-N-methylguanidine			C19H21BrF3N3			guanidine	uncompetitive NMDAR antagonist	PCP-site (ion channel)	CCC1=CC(=CC=C1)N(C)C(=N)NC1=C(Br)C(CC)=CC(=C1)C(F)(F)F	CCc1cccc(c1)N(C(=N)Nc1cc(cc(c1Br)CC)C(F)(F)F)C	78		MK-801	Hu et al., 1997
N'‐(2‐chloro‐3‐ethyl‐5‐methylphenyl)‐N‐(3‐ethylphenyl)guanidine			C18H22ClN3			guanidine	uncompetitive NMDAR antagonist	PCP-site (ion channel)	CCC1=CC(NC(=N)NC2=C(Cl)C(CC)=CC(C)=C2)=CC=C1	CCc1cccc(c1)NC(=N)Nc1cc(C)cc(c1Cl)CC	77		MK-801	Hu et al., 1997
N'‐(2‐chloro‐3‐ethyl‐5‐methylphenyl)‐N‐(3‐ethylphenyl)‐N‐methylguanidine			C19H24ClN3			guanidine	uncompetitive NMDAR antagonist	PCP-site (ion channel)	CCC1=CC(=CC=C1)N(C)C(=N)NC1=C(Cl)C(CC)=CC(C)=C1	CCc1cccc(c1)N(C(=N)Nc1cc(C)cc(c1Cl)CC)C	78		MK-801	Hu et al., 1997
N'‐[2‐chloro‐3‐ethyl‐5‐(methylsulfanyl)phenyl]‐N‐(3‐ethylphenyl)guanidine			C18H22ClN3S			guanidine	uncompetitive NMDAR antagonist	PCP-site (ion channel)	CCC1=CC(NC(=N)NC2=C(Cl)C(CC)=CC(SC)=C2)=CC=C1	CCc1cccc(c1)NC(=N)Nc1cc(SC)cc(c1Cl)CC	11.8		MK-801	Hu et al., 1997
N'‐[2‐chloro‐3‐ethyl‐5‐(methylsulfanyl)phenyl]‐N‐(3‐ethylphenyl)-N-methylguanidine			C19H24ClN3S			guanidine	uncompetitive NMDAR antagonist	PCP-site (ion channel)	CCC1=CC(=CC=C1)N(C)C(=N)NC1=C(Cl)C(CC)=CC(SC)=C1	CCc1cccc(c1)N(C(=N)Nc1cc(SC)cc(c1Cl)CC)C	5.1		MK-801	Hu et al., 1997
N'‐[2‐bromo‐3‐ethyl‐5‐(methylsulfanyl)phenyl]‐N‐(3‐ethylphenyl)-N-methylguanidine			C19H24BrN3S			guanidine	uncompetitive NMDAR antagonist	PCP-site (ion channel)	CCC1=CC(=CC=C1)N(C)C(=N)NC1=C(Br)C(CC)=CC(SC)=C1	CCc1cccc(c1)N(C(=N)Nc1cc(SC)cc(c1Br)CC)C	2.45		MK-801	Hu et al., 1997
N'‐(2,5‐dibromo‐3‐ethylphenyl)‐N‐(3‐ethylphenyl)guanidine			C17H19Br2N3			guanidine	uncompetitive NMDAR antagonist	PCP-site (ion channel)	CCC1=CC(NC(=N)NC2=C(Br)C(CC)=CC(Br)=C2)=CC=C1	CCc1cccc(c1)NC(=N)Nc1cc(Br)cc(c1Br)CC	67		MK-801	Hu et al., 1997
N'‐(2,5‐dibromo‐3‐ethylphenyl)‐N‐(3‐ethylphenyl)‐N‐methylguanidine			C18H21Br2N3			guanidine	uncompetitive NMDAR antagonist	PCP-site (ion channel)	CCC1=CC(=CC=C1)N(C)C(=N)NC1=C(Br)C(CC)=CC(Br)=C1	CCc1cccc(c1)N(C(=N)Nc1cc(Br)cc(c1Br)CC)C	37		MK-801	Hu et al., 1997
N'‐(2,5‐dichloro‐3‐ethylphenyl)‐N‐(3‐ethylphenyl)guanidine			C17H19Cl2N3			guanidine	uncompetitive NMDAR antagonist	PCP-site (ion channel)	CCC1=CC(NC(=N)NC2=C(Cl)C(CC)=CC(Cl)=C2)=CC=C1	CCc1cccc(c1)NC(=N)Nc1cc(Cl)cc(c1Cl)CC	68		MK-801	Hu et al., 1997
N'‐(2,5‐dichloro‐3‐ethylphenyl)‐N‐(3‐ethylphenyl)-N-methylguanidine			C18H21Cl2N3			guanidine	uncompetitive NMDAR antagonist	PCP-site (ion channel)	CCC1=CC(=CC=C1)N(C)C(=N)NC1=C(Cl)C(CC)=CC(Cl)=C1	CCc1cccc(c1)N(C(=N)Nc1cc(Cl)cc(c1Cl)CC)C	65		MK-801	Hu et al., 1997
N'‐[2‐chloro‐5‐ethyl‐3‐(trifluoromethyl)phenyl]‐N‐(3‐ethylphenyl)‐N‐methylguanidine			C19H21ClF3N3			guanidine	uncompetitive NMDAR antagonist	PCP-site (ion channel)	CCC1=CC(=CC=C1)N(C)C(=N)NC1=C(Cl)C(=CC(CC)=C1)C(F)(F)F	CCc1cccc(c1)N(C(=N)Nc1cc(CC)cc(c1Cl)C(F)(F)F)C	59.2		MK-801	Hu et al., 1997
N'‐[2‐bromo‐5‐ethyl‐3‐(trifluoromethyl)phenyl]‐N‐(3‐ethylphenyl)‐N‐methylguanidine			C19H21BrF3N3			guanidine	uncompetitive NMDAR antagonist	PCP-site (ion channel)	CCC1=CC(=CC=C1)N(C)C(=N)NC1=C(Br)C(=CC(CC)=C1)C(F)(F)F	CCc1cccc(c1)N(C(=N)Nc1cc(CC)cc(c1Br)C(F)(F)F)C	15.7		MK-801	Hu et al., 1997
N'‐[2‐chloro‐5‐(methylsulfanyl)‐3‐(trifluoromethyl)phenyl]‐N‐(3‐ethylphenyl)‐N‐methylguanidine			C18H19ClF3N3S			guanidine	uncompetitive NMDAR antagonist	PCP-site (ion channel)	CCC1=CC(=CC=C1)N(C)C(=N)NC1=C(Cl)C(=CC(SC)=C1)C(F)(F)F	CCc1cccc(c1)N(C(=N)Nc1cc(SC)cc(c1Cl)C(F)(F)F)C	6.9		MK-801	Hu et al., 1997
N'‐[2‐bromo‐5‐(methylsulfanyl)‐3‐(trifluoromethyl)phenyl]‐N‐(3‐ethylphenyl)‐N‐methylguanidine			C18H19BrF3N3S			guanidine	uncompetitive NMDAR antagonist	PCP-site (ion channel)	CCC1=CC(=CC=C1)N(C)C(=N)NC1=C(Br)C(=CC(SC)=C1)C(F)(F)F	CCc1cccc(c1)N(C(=N)Nc1cc(SC)cc(c1Br)C(F)(F)F)C	4.27		MK-801	Hu et al., 1997
N'‐[2,5‐dibromo‐3‐(trifluoromethyl)phenyl]‐N‐(3‐ethylphenyl)‐N‐methylguanidine			C17H16Br2F3N3			guanidine	uncompetitive NMDAR antagonist	PCP-site (ion channel)	CCC1=CC(=CC=C1)N(C)C(=N)NC1=C(Br)C(=CC(Br)=C1)C(F)(F)F	CCc1cccc(c1)N(C(=N)Nc1cc(Br)cc(c1Br)C(F)(F)F)C	26.1		MK-801	Hu et al., 1997
N'‐[2,5‐dichloro‐3‐(trifluoromethyl)phenyl]‐N‐(3‐ethylphenyl)‐N‐methylguanidine			C17H16Cl2F3N3			guanidine	uncompetitive NMDAR antagonist	PCP-site (ion channel)	CCC1=CC(=CC=C1)N(C)C(=N)NC1=C(Cl)C(=CC(Cl)=C1)C(F)(F)F	CCc1cccc(c1)N(C(=N)Nc1cc(Cl)cc(c1Cl)C(F)(F)F)C	155		MK-801	Hu et al., 1997
N'‐[2‐chloro‐5‐ethyl‐3‐(methylsulfanyl)phenyl]‐N‐(3‐ethylphenyl)‐N‐methylguanidine			C19H24ClN3S			guanidine	uncompetitive NMDAR antagonist	PCP-site (ion channel)	CCC1=CC(=CC=C1)N(C)C(=N)NC1=C(Cl)C(SC)=CC(CC)=C1	CCc1cccc(c1)N(C(=N)Nc1cc(CC)cc(c1Cl)SC)C	9.69		MK-801	Hu et al., 1997
N'‐[2‐bromo‐5‐ethyl‐3‐(methylsulfanyl)phenyl]‐N‐(3‐ethylphenyl)‐N‐methylguanidine			C19H24BrN3S			guanidine	uncompetitive NMDAR antagonist	PCP-site (ion channel)	CCC1=CC(=CC=C1)N(C)C(=N)NC1=C(Br)C(SC)=CC(CC)=C1	CCc1cccc(c1)N(C(=N)Nc1cc(CC)cc(c1Br)SC)C	3.92		MK-801	Hu et al., 1997
N'‐[2‐chloro‐3,5‐bis(methylsulfanyl)phenyl]‐N‐(3‐ethylphenyl)‐N‐methylguanidine			C18H22ClN3S2			guanidine	uncompetitive NMDAR antagonist	PCP-site (ion channel)	CCC1=CC(=CC=C1)N(C)C(=N)NC1=C(Cl)C(SC)=CC(SC)=C1	CCc1cccc(c1)N(C(=N)Nc1cc(SC)cc(c1Cl)SC)C	1.87		MK-801	Hu et al., 1997
N'‐[2‐bromo‐3,5‐bis(methylsulfanyl)phenyl]‐N‐(3‐ethylphenyl)‐N‐methylguanidine			C18H22BrN3S2			guanidine	uncompetitive NMDAR antagonist	PCP-site (ion channel)	CCC1=CC(=CC=C1)N(C)C(=N)NC1=C(Br)C(SC)=CC(SC)=C1	CCc1cccc(c1)N(C(=N)Nc1cc(SC)cc(c1Br)SC)C	1.65		MK-801	Hu et al., 1997
N'‐[2,5‐dibromo‐3‐(methylsulfanyl)phenyl]‐N‐(3‐ethylphenyl)‐N‐methylguanidine			C17H19Br2N3S			guanidine	uncompetitive NMDAR antagonist	PCP-site (ion channel)	CCC1=CC(=CC=C1)N(C)C(=N)NC1=C(Br)C(SC)=CC(Br)=C1	CCc1cccc(c1)N(C(=N)Nc1cc(Br)cc(c1Br)SC)C	4.13		MK-801	Hu et al., 1997
N'‐[2,5‐dichloro‐3‐(methylsulfanyl)phenyl]‐N‐(3‐ethylphenyl)‐N‐methylguanidine			C17H19Cl2N3S			guanidine	uncompetitive NMDAR antagonist	PCP-site (ion channel)	CCC1=CC(=CC=C1)N(C)C(=N)NC1=C(Cl)C(SC)=CC(Cl)=C1	CCc1cccc(c1)N(C(=N)Nc1cc(Cl)cc(c1Cl)SC)C	45.6		MK-801	Hu et al., 1997
N'‐(2,5‐dibromo‐3‐methanesulfonylphenyl)‐N‐(3‐ethylphenyl)‐N‐methylguanidine			C17H19Br2N3O2S			guanidine	uncompetitive NMDAR antagonist	PCP-site (ion channel)	CCC1=CC(=CC=C1)N(C)C(=N)NC1=C(Br)C(=CC(Br)=C1)S(C)(=O)=O	CCc1cccc(c1)N(C(=N)Nc1cc(Br)cc(c1Br)S(=O)(=O)C)C	408		MK-801	Hu et al., 1997
N'‐[2,5‐dibromo‐3‐(trifluoromethoxy)phenyl]‐N‐(3‐ethylphenyl)‐N‐methylguanidine			C17H16Br2F3N3O			guanidine	uncompetitive NMDAR antagonist	PCP-site (ion channel)	CCC1=CC(=CC=C1)N(C)C(=N)NC1=C(Br)C(OC(F)(F)F)=CC(Br)=C1	CCc1cccc(c1)N(C(=N)Nc1cc(Br)cc(c1Br)OC(F)(F)F)C	19.7		MK-801	Hu et al., 1997
N'‐[2‐bromo‐3‐(1,1‐difluoroethoxy)‐5‐ethylphenyl]‐N‐(3‐ethylphenyl)‐N‐methylguanidine			C20H24BrF2N3O			guanidine	uncompetitive NMDAR antagonist	PCP-site (ion channel)	CCC1=CC(=CC=C1)N(C)C(=N)NC1=C(Br)C(OC(C)(F)F)=CC(CC)=C1	CCc1cc(NC(=N)N(c2cccc(c2)CC)C)c(c(c1)OC(F)(F)C)Br	12.3		MK-801	Hu et al., 1997
N'‐[3‐bromo‐2‐chloro‐5‐(methylsulfanyl)phenyl]‐N‐(3‐ethylphenyl)‐N‐methylguanidine			C17H19BrClN3S			guanidine	uncompetitive NMDAR antagonist	PCP-site (ion channel)	CCC1=CC(=CC=C1)N(C)C(=N)NC1=C(Cl)C(Br)=CC(SC)=C1	CCc1cccc(c1)N(C(=N)Nc1cc(SC)cc(c1Cl)Br)C	3.85		MK-801	Hu et al., 1997
1‐[1‐(4‐butoxyphenyl)cyclohexyl]piperidine			C21H33NO			anisylcyclohexylamine	uncompetitive NMDAR antagonist	PCP-site (ion channel)	CCCCOC1=CC=C(C=C1)C1(CCCCC1)N1CCCCC1	CCCCOc1ccc(cc1)C1(CCCCC1)N1CCCCC1		4.3 pIC50		Zarantonello et al., 2011
1‐[1‐(3‐butoxyphenyl)cyclohexyl]piperidine			C21H33NO			anisylcyclohexylamine	uncompetitive NMDAR antagonist	PCP-site (ion channel)	CCCCOC1=CC=CC(=C1)C1(CCCCC1)N1CCCCC1	CCCCOc1cccc(c1)C1(CCCCC1)N1CCCCC1		4.7, 5.7 pIC50		Zarantonello et al., 2011
1‐{1‐[3‐(2,2,2‐trifluoroethoxy)phenyl]cyclohexyl}piperidine			C19H26F3NO			anisylcyclohexylamine	uncompetitive NMDAR antagonist	PCP-site (ion channel)	FC(F)(F)COC1=CC=CC(=C1)C1(CCCCC1)N1CCCCC1	FC(COc1cccc(c1)C1(CCCCC1)N1CCCCC1)(F)F		4.5, 5.3 pIC50		Zarantonello et al., 2011
2‐[1‐(piperidin‐1‐yl)cyclohexyl]pyridine			C16H24N2			arylcyclohexylamine	uncompetitive NMDAR antagonist	PCP-site (ion channel)	C1CCN(CC1)C1(CCCCC1)C1=NC=CC=C1	C1CCC(CC1)(N1CCCCC1)c1ccccn1		5.1, 5.6 pIC50		Zarantonello et al., 2011
3‐phenyl‐3‐(piperidin‐1‐yl)pyrrolidin‐2‐one			C15H20N2O				uncompetitive NMDAR antagonist	PCP-site (ion channel)	O=C1NCCC1(N1CCCCC1)C1=CC=CC=C1	O=C1NCCC1(N1CCCCC1)c1ccccc1		4.2, 4.6 pIC50		Zarantonello et al., 2011
1‐methyl‐3‐phenyl‐3‐(piperidin‐1‐yl)pyrrolidin‐2‐one			C16H22N2O				uncompetitive NMDAR antagonist	PCP-site (ion channel)	CN1CCC(N2CCCCC2)(C1=O)C1=CC=CC=C1	CN1CCC(C1=O)(N1CCCCC1)c1ccccc1		3.6, 4.3 pIC50		Zarantonello et al., 2011
3'‐phenyl‐[1,3'‐bipiperidin]‐2'‐one			C16H22N2O				uncompetitive NMDAR antagonist	PCP-site (ion channel)	O=C1NCCCC1(N1CCCCC1)C1=CC=CC=C1	O=C1NCCCC1(N1CCCCC1)c1ccccc1		3.8, 4.6 pIC50		Zarantonello et al., 2011
1'-methyl-3'‐phenyl‐[1,3'‐bipiperidin]‐2'‐one			C17H24N2O				uncompetitive NMDAR antagonist	PCP-site (ion channel)	CN1CCCC(N2CCCCC2)(C1=O)C1=CC=CC=C1	CN1CCCC(C1=O)(N1CCCCC1)c1ccccc1		3.6, 5.5 pIC50		Zarantonello et al., 2011
3‐amino‐3‐(2‐chlorophenyl)piperidin‐2‐one			C11H13ClN2O			arylcyclohexylamine	uncompetitive NMDAR antagonist	PCP-site (ion channel)	NC1(CCCNC1=O)C1=C(Cl)C=CC=C1	O=C1NCCCC1(N)c1ccccc1Cl		4.3 pIC50		Zarantonello et al., 2011
3‐(2‐chlorophenyl)‐3‐(methylamino)piperidin‐2‐one			C12H15ClN2O			arylcyclohexylamine	uncompetitive NMDAR antagonist	PCP-site (ion channel)	CNC1(CCCNC1=O)C1=C(Cl)C=CC=C1	CNC1(CCCNC1=O)c1ccccc1Cl		3.6, 4.4 pIC50		Zarantonello et al., 2011
3‐(2‐chlorophenyl)‐1-methyl-3‐(methylamino)piperidin‐2‐one			C13H17ClN2O			arylcyclohexylamine	uncompetitive NMDAR antagonist	PCP-site (ion channel)	CNC1(CCCN(C)C1=O)C1=C(Cl)C=CC=C1	CNC1(CCCN(C1=O)C)c1ccccc1Cl		3.6 pIC50		Zarantonello et al., 2011
2‐(2‐chloro‐4‐methoxyphenyl)‐2‐(methylamino)cyclohexan‐1‐one			C14H18ClNO2			arylcyclohexylamine	uncompetitive NMDAR antagonist	PCP-site (ion channel)	CNC1(CCCCC1=O)C1=C(Cl)C=C(OC)C=C1	CNC1(CCCCC1=O)c1ccc(cc1Cl)OC		4.7, 5 pIC50		Zarantonello et al., 2011
(4aS,9aR)‐4a,9a‐dimethyl‐1H,2H,3H,4H,4aH,9H,9aH‐indeno[2,1‐c]pyridin‐6‐ol			C14H19NO			indenopyridine	uncompetitive NMDAR antagonist	PCP-site (ion channel)	C[C@@]12CC3=CC=C(O)C=C3[C@]1(C)CCNC2	Oc1ccc2c(c1)[C@]1(C)CCNC[C@@]1(C2)C		817	PCP	Domino & Kamenka, 1988.
(4aS,9aR)‐2,4a,9a‐trimethyl‐1H,2H,3H,4H,4aH,9H,9aH‐indeno[2,1‐c]pyridin‐6‐ol			C15H21NO			indenopyridine	uncompetitive NMDAR antagonist	PCP-site (ion channel)	CN1CC[C@@]2(C)C3=CC(O)=CC=C3C[C@@]2(C)C1	CN1CC[C@@]2([C@@](C1)(C)Cc1c2cc(cc1)O)C		530	PCP	Domino & Kamenka, 1988.
(4aS,9aR)‐2‐ethyl‐6‐methoxy‐4a,9a‐dimethyl‐1H,2H,3H,4H,4aH,9H,9aH‐indeno[2,1‐c]pyridine			C17H25NO			indenopyridine	uncompetitive NMDAR antagonist	PCP-site (ion channel)	CCN1CC[C@@]2(C)C3=CC(OC)=CC=C3C[C@@]2(C)C1	CCN1CC[C@@]2([C@@](C1)(C)Cc1c2cc(cc1)OC)C		230	PCP	Domino & Kamenka, 1988.
(4aS,9aR)‐2-ethyl-4a,9a‐dimethyl‐1H,2H,3H,4H,4aH,9H,9aH‐indeno[2,1‐c]pyridin‐6‐ol			C16H23NO			indenopyridine	uncompetitive NMDAR antagonist	PCP-site (ion channel)	CCN1CC[C@@]2(C)C3=CC(O)=CC=C3C[C@@]2(C)C1	CCN1CC[C@@]2([C@@](C1)(C)Cc1c2cc(cc1)O)C		152	PCP	Domino & Kamenka, 1988.
(4aS,9aR)‐6‐methoxy‐4a,9a‐dimethyl‐2‐methylidene‐1H,2H,3H,4H,4aH,9H,9aH‐2lambda5‐indeno[2,1‐c]pyridin‐2‐ylium			C16H22[N+]O			indenopyridine	uncompetitive NMDAR antagonist	PCP-site (ion channel)	COC1=CC=C2C[C@@]3(C)C[N+](=C)CC[C@@]3(C)C2=C1	COc1ccc2c(c1)[C@]1(C)CC[N+](=C)C[C@@]1(C2)C		177	PCP	Domino & Kamenka, 1988.
(4aS,9aR)‐6‐hydroxy‐4a,9a‐dimethyl‐2‐methylidene‐1H,2H,3H,4H,4aH,9H,9aH‐2lambda5‐indeno[2,1‐c]pyridin‐2‐ylium			C15H20[N+]O			indenopyridine	uncompetitive NMDAR antagonist	PCP-site (ion channel)	C[C@@]12CC3=CC=C(O)C=C3[C@]1(C)CC[N+](=C)C2	C=[N+]1CC[C@@]2([C@@](C1)(C)Cc1c2cc(cc1)O)C		94	PCP	Domino & Kamenka, 1988.
(4aS,9aR)‐4a,9a‐dimethyl‐2‐(prop‐2‐en‐1‐yl)‐1H,2H,3H,4H,4aH,9H,9aH‐indeno[2,1‐c]pyridin‐6‐ol			C17H23NO			indenopyridine	uncompetitive NMDAR antagonist	PCP-site (ion channel)	C[C@@]12CC3=CC=C(O)C=C3[C@]1(C)CCN(CC=C)C2	C=CCN1CC[C@@]2([C@@](C1)(C)Cc1c2cc(cc1)O)C		62	PCP	Domino & Kamenka, 1988.
(4aS,9aR)‐4a,9a‐dimethyl‐2‐(2‐phenylethyl)‐1H,2H,3H,4H,4aH,9H,9aH‐indeno[2,1‐c]pyridin‐6‐ol			C22H27NO			indenopyridine	uncompetitive NMDAR antagonist	PCP-site (ion channel)	C[C@@]12CC3=CC=C(O)C=C3[C@]1(C)CCN(CCC1=CC=CC=C1)C2	Oc1ccc2c(c1)[C@]1(C)CCN(C[C@@]1(C2)C)CCc1ccccc1		807	PCP	Domino & Kamenka, 1988.
(10bR)‐3,10b‐dimethyl‐1H,2H,3H,4H,4aH,5H,6H,10bH‐benzo[f]isoquinolin‐9‐ol			C15H21NO			benz(f)isoquinoline	uncompetitive NMDAR antagonist	PCP-site (ion channel)	CN1CC[C@]2(C)C(CCC3=CC=C(O)C=C23)C1	CN1CC[C@@]2(C(C1)CCc1c2cc(O)cc1)C		992	PCP	Domino & Kamenka, 1988.
(10bR)‐10b‐methyl‐3‐(prop‐2‐en‐1‐yl)‐1H,2H,3H,4H,4aH,5H,6H,10bH‐benzo[f]isoquinolin‐9‐ol			C17H25NO			benz(f)isoquinoline	uncompetitive NMDAR antagonist	PCP-site (ion channel)	C[C@@]12CCN(CC=C)CC1CCC1=CC=C(O)C=C21	C=CCN1CC[C@@]2(C(C1)CCc1c2cc(O)cc1)C		123	PCP	Domino & Kamenka, 1988.
(10bR)‐9‐hydroxy‐10b‐methyl‐3‐methylidene‐1H,2H,3H,4H,4aH,5H,6H,10bH‐3lambda5‐benzo[f]isoquinolin‐3‐ylium			C15H20[N+]O			benz(f)isoquinoline	uncompetitive NMDAR antagonist	PCP-site (ion channel)	C[C@@]12CC[N+](=C)CC1CCC1=CC=C(O)C=C21	C=[N+]1CC[C@@]2(C(C1)CCc1c2cc(O)cc1)C		353	PCP	Domino & Kamenka, 1988.
(4aS,9aR)‐6‐methoxy‐9a‐methyl‐4a‐propyl‐1H,2H,3H,4H,4aH,9H,9aH‐indeno[2,1‐c]pyridine			C17H25NO			indenopyridine	uncompetitive NMDAR antagonist	PCP-site (ion channel)	CCC[C@@]12CCNC[C@]1(C)CC1=CC=C(OC)C=C21	CCC[C@]12CCNC[C@]2(C)Cc2c1cc(OC)cc2		293	PCP	Domino & Kamenka, 1988.
(4aS,9aR)‐2,9a‐dimethyl‐4a‐propyl‐1H,2H,3H,4H,4aH,9H,9aH‐indeno[2,1‐c]pyridin‐6‐ol			C17H25NO			indenopyridine	uncompetitive NMDAR antagonist	PCP-site (ion channel)	CCC[C@@]12CCN(C)C[C@]1(C)CC1=CC=C(O)C=C21	CCC[C@]12CCN(C[C@]2(C)Cc2c1cc(O)cc2)C		147	PCP	Domino & Kamenka, 1988.
(4aS,9aR)‐2‐ethyl‐9a‐methyl‐4a‐propyl‐1H,2H,3H,4H,4aH,9H,9aH‐indeno[2,1‐c]pyridin‐6‐ol			C18H27NO			indenopyridine	uncompetitive NMDAR antagonist	PCP-site (ion channel)	CCC[C@@]12CCN(CC)C[C@]1(C)CC1=CC=C(O)C=C21	CCC[C@]12CCN(C[C@]2(C)Cc2c1cc(O)cc2)CC		37	PCP	Domino & Kamenka, 1988.
[(2,2‐diphenyl‐1,3‐dioxolan‐4‐yl)methyl](methyl)amine			C17H19NO2			dioxolane	uncompetitive NMDAR antagonist	PCP-site (ion channel)	CNCC1COC(O1)(C1=CC=CC=C1)C1=CC=CC=C1	CNCC1COC(O1)(c1ccccc1)c1ccccc1		28	PCP	Domino & Kamenka, 1988.
[(2,2‐diphenyl‐1,3‐dioxolan‐4‐yl)methyl](ethyl)amine			C18H21NO2			dioxolane	uncompetitive NMDAR antagonist	PCP-site (ion channel)	CCNCC1COC(O1)(C1=CC=CC=C1)C1=CC=CC=C1	CCNCC1COC(O1)(c1ccccc1)c1ccccc1		27	PCP	Domino & Kamenka, 1988.
butyl[(2,2‐diphenyl‐1,3‐dioxolan‐4‐yl)methyl]amine			C20H25NO2			dioxolane	uncompetitive NMDAR antagonist	PCP-site (ion channel)	CCCCNCC1COC(O1)(C1=CC=CC=C1)C1=CC=CC=C1	CCCCNCC1COC(O1)(c1ccccc1)c1ccccc1		13	PCP	Domino & Kamenka, 1988.
[(2,2‐diphenyl‐1,3‐dioxolan‐4‐yl)methyl](prop‐2‐en‐1‐yl)amine			C19H21NO2			dioxolane	uncompetitive NMDAR antagonist	PCP-site (ion channel)	C=CCNCC1COC(O1)(C1=CC=CC=C1)C1=CC=CC=C1	C=CCNCC1COC(O1)(c1ccccc1)c1ccccc1		15	PCP	Domino & Kamenka, 1988.
benzyl[(2,2‐diphenyl‐1,3‐dioxolan‐4‐yl)methyl]amine			C23H23NO2			dioxolane	uncompetitive NMDAR antagonist	PCP-site (ion channel)	C(NCC1=CC=CC=C1)C1COC(O1)(C1=CC=CC=C1)C1=CC=CC=C1	c1ccc(cc1)CNCC1COC(O1)(c1ccccc1)c1ccccc1		14	PCP	Domino & Kamenka, 1988.
1‐[(2,2‐diphenyl‐1,3‐dioxolan‐4‐yl)methyl]piperidine			C21H25NO2			dioxolane	uncompetitive NMDAR antagonist	PCP-site (ion channel)	C(C1COC(O1)(C1=CC=CC=C1)C1=CC=CC=C1)N1CCCCC1	C1CCN(CC1)CC1COC(O1)(c1ccccc1)c1ccccc1		17	PCP	Domino & Kamenka, 1988.
1‐[(4S)‐2,2‐diphenyl‐1,3‐dioxolan‐4‐yl]ethan‐1‐amine			C17H19NO2			dioxolane	uncompetitive NMDAR antagonist	PCP-site (ion channel)	[H]C(C)(N)[C@@]1([H])COC(O1)(C1=CC=CC=C1)C1=CC=CC=C1	CC([C@H]1COC(O1)(c1ccccc1)c1ccccc1)N		58	PCP	Domino & Kamenka, 1988.
{1‐[(4S)‐2,2‐diphenyl‐1,3‐dioxolan‐4‐yl]ethyl}(methyl)amine			C18H21NO2			dioxolane	uncompetitive NMDAR antagonist	PCP-site (ion channel)	[H]C(C)(NC)[C@@]1([H])COC(O1)(C1=CC=CC=C1)C1=CC=CC=C1	CNC([C@H]1COC(O1)(c1ccccc1)c1ccccc1)C		85	PCP	Domino & Kamenka, 1988.
1‐[(4S)‐2,2‐diphenyl‐1,3‐dioxolan‐4‐yl]butan‐1‐amine			C19H23NO2			dioxolane	uncompetitive NMDAR antagonist	PCP-site (ion channel)	[H]C(N)(CCC)[C@@]1([H])COC(O1)(C1=CC=CC=C1)C1=CC=CC=C1	CCCC([C@H]1COC(O1)(c1ccccc1)c1ccccc1)N		220	PCP	Domino & Kamenka, 1988.
1-phenyl-N-propylcyclohexan-1-amine	NPPCA		C15H23N			arylcyclohexylamine	uncompetitive NMDAR antagonist	PCP-site (ion channel)	CCCNC1(CCCCC1)C1=CC=CC=C1	CCCNC1(CCCCC1)c1ccccc1		92, 310	PCP	Domino & Kamenka, 1988. Zukin & Zukin, 1979.
3‐[1‐(methylamino)cyclohexyl]phenol			C13H19NO			arylcyclohexylamine	uncompetitive NMDAR antagonist	PCP-site (ion channel)	CNC1(CCCCC1)C1=CC=CC(O)=C1	CNC1(CCCCC1)c1cccc(c1)O		422	PCP	Domino & Kamenka, 1988.
3‐[1‐(propylamino)cyclohexyl]phenol			C15H23NO			arylcyclohexylamine	uncompetitive NMDAR antagonist	PCP-site (ion channel)	CCCNC1(CCCCC1)C1=CC=CC(O)=C1	CCCNC1(CCCCC1)c1cccc(c1)O		39	PCP	Domino & Kamenka, 1988.
1‐{1‐[3‐(1,3‐dioxolan‐2‐yl)phenyl]cyclohexyl}piperidine			C20H29NO2			arylcyclohexylamine, dioxolane	uncompetitive NMDAR antagonist	PCP-site (ion channel)	C1COC(O1)C1=CC(=CC=C1)C1(CCCCC1)N1CCCCC1	C1CCC(CC1)(N1CCCCC1)c1cccc(c1)C1OCCO1		279	PCP	Domino & Kamenka, 1988.
3‐[1‐(piperidin‐1‐yl)cyclohexyl]benzaldehyde			C18H25NO			arylcyclohexylamine	uncompetitive NMDAR antagonist	PCP-site (ion channel)	O=CC1=CC(=CC=C1)C1(CCCCC1)N1CCCCC1	O=Cc1cccc(c1)C1(CCCCC1)N1CCCCC1		393	PCP	Domino & Kamenka, 1988.
{3‐[1‐(piperidin‐1‐yl)cyclohexyl]phenyl}methanol			C18H27NO			arylcyclohexylamine	uncompetitive NMDAR antagonist	PCP-site (ion channel)	OCC1=CC(=CC=C1)C1(CCCCC1)N1CCCCC1	OCc1cccc(c1)C1(CCCCC1)N1CCCCC1		32	PCP	Domino & Kamenka, 1988.
1‐{3‐[1‐(piperidin‐1‐yl)cyclohexyl]phenyl}ethan‐1‐ol			C19H29NO			arylcyclohexylamine	uncompetitive NMDAR antagonist	PCP-site (ion channel)	CC(O)C1=CC(=CC=C1)C1(CCCCC1)N1CCCCC1	CC(c1cccc(c1)C1(CCCCC1)N1CCCCC1)O		85	PCP	Domino & Kamenka, 1988.
2‐methyl‐1‐{3‐[1‐(piperidin‐1‐yl)cyclohexyl]phenyl}propan‐1‐ol			C21H33NO			arylcyclohexylamine	uncompetitive NMDAR antagonist	PCP-site (ion channel)	CC(C)C(O)C1=CC(=CC=C1)C1(CCCCC1)N1CCCCC1	CC(C(c1cccc(c1)C1(CCCCC1)N1CCCCC1)O)C		389	PCP	Domino & Kamenka, 1988.
phenyl({3‐[1‐(piperidin‐1‐yl)cyclohexyl]phenyl})methanol			C24H31NO			arylcyclohexylamine	uncompetitive NMDAR antagonist	PCP-site (ion channel)	OC(C1=CC=CC=C1)C1=CC(=CC=C1)C1(CCCCC1)N1CCCCC1	OC(c1cccc(c1)C1(CCCCC1)N1CCCCC1)c1ccccc1		40	PCP	Domino & Kamenka, 1988.
2,2,2‐trifluoro‐N‐{3‐[1‐(piperidin‐1‐yl)cyclohexyl]phenyl}acetamide			C19H25F3N20			arylcyclohexylamine	uncompetitive NMDAR antagonist	PCP-site (ion channel)	FC(F)(F)C(=O)NC1=CC(=CC=C1)C1(CCCCC1)N1CCCCC1	O=C(C(F)(F)F)Nc1cccc(c1)C1(CCCCC1)N1CCCCC1		330	PCP	Domino & Kamenka, 1988.
N‐{3‐[1‐(piperidin‐1‐yl)cyclohexyl]phenyl}methanesulfonamide			C18H28N2O2S			arylcyclohexylamine	uncompetitive NMDAR antagonist	PCP-site (ion channel)	CS(=O)(=O)NC1=CC(=CC=C1)C1(CCCCC1)N1CCCCC1	CS(=O)(=O)Nc1cccc(c1)C1(CCCCC1)N1CCCCC1		592	PCP	Domino & Kamenka, 1988.
4‐[1‐(piperidin‐1‐yl)cyclohexyl]benzaldehyde			C18H25NO			arylcyclohexylamine	uncompetitive NMDAR antagonist	PCP-site (ion channel)	O=CC1=CC=C(C=C1)C1(CCCCC1)N1CCCCC1	O=Cc1ccc(cc1)C1(CCCCC1)N1CCCCC1		5.802	PCP	Domino & Kamenka, 1988.
{4‐[1‐(piperidin‐1‐yl)cyclohexyl]phenyl}methanol			C18H27NO			arylcyclohexylamine	uncompetitive NMDAR antagonist	PCP-site (ion channel)	OCC1=CC=C(C=C1)C1(CCCCC1)N1CCCCC1	OCc1ccc(cc1)C1(CCCCC1)N1CCCCC1		3.079	PCP	Domino & Kamenka, 1988.
1‐[1‐(3‐nitrophenyl)cyclohexyl]piperidine			C17H24N[N+]O[O-]			arylcyclohexylamine	uncompetitive NMDAR antagonist	PCP-site (ion channel)	[O-][N+](=O)C1=CC(=CC=C1)C1(CCCCC1)N1CCCCC1	[O-][N+](=O)c1cccc(c1)C1(CCCCC1)N1CCCCC1		681	PCP	Domino & Kamenka, 1988.
16-azatetracyclo[7.6.1.02,7.010,15]hexadeca-2,4,6,10,12,14-hexaene			C15H13N			dibenzocycloalkenamine	uncompetitive NMDAR antagonist	PCP-site (ion channel)	C1C2NC(C3=CC=CC=C23)C2=CC=CC=C12	c1ccc2c(c1)C1NC(C2)c2c1cccc2	120, 22600		TCP, MK-801(22,600 val)	Monn et al., 1990. Thompson et al., 1990
9-methyl-16-azatetracyclo[7.6.1.02,7.010,15]hexadeca-2,4,6,10,12,14-hexaene			C16H15N			dibenzocycloalkenamine	uncompetitive NMDAR antagonist	PCP-site (ion channel)	CC12CC3=CC=CC=C3C(N1)C1=CC=CC=C21	CC12Cc3ccccc3C(N1)c1c2cccc1	9		TCP	Monn et al., 1990
9-ethyl-16-azatetracyclo[7.6.1.02,7.010,15]hexadeca-2,4,6,10,12,14-hexaene			C17H17N			dibenzocycloalkenamine	uncompetitive NMDAR antagonist	PCP-site (ion channel)	CCC12CC3=CC=CC=C3C(N1)C1=CC=CC=C21	CCC12Cc3ccccc3C(N1)c1c2cccc1	12		TCP	Monn et al., 1990
9-propyl-16-azatetracyclo[7.6.1.02,7.010,15]hexadeca-2,4,6,10,12,14-hexaene			C18H19N			dibenzocycloalkenamine	uncompetitive NMDAR antagonist	PCP-site (ion channel)	CCCC12CC3=CC=CC=C3C(N1)C1=CC=CC=C21	CCCC12Cc3ccccc3C(N1)c1c2cccc1	1100		TCP	Monn et al., 1990
9-hexyl-16-azatetracyclo[7.6.1.02,7.010,15]hexadeca-2,4,6,10,12,14-hexaene			C21H25N			dibenzocycloalkenamine	uncompetitive NMDAR antagonist	PCP-site (ion channel)	CCCCCCC12CC3=CC=CC=C3C(N1)C1=CC=CC=C21	CCCCCCC12Cc3ccccc3C(N1)c1c2cccc1	980		TCP	Monn et al., 1990
9-decyl-16-azatetracyclo[7.6.1.02,7.010,15]hexadeca-2,4,6,10,12,14-hexaene			C25H33N			dibenzocycloalkenamine	uncompetitive NMDAR antagonist	PCP-site (ion channel)	CCCCCCCCCCC12CC3=CC=CC=C3C(N1)C1=CC=CC=C21	CCCCCCCCCCC12Cc3ccccc3C(N1)c1c2cccc1	21600		TCP	Monn et al., 1990
9-(prop-2-en-1-yl)-16-azatetracyclo[7.6.1.02,7.010,15]hexadeca-2,4,6,10,12,14-hexaene			C18H17N			dibenzocycloalkenamine	uncompetitive NMDAR antagonist	PCP-site (ion channel)	C=CCC12CC3=CC=CC=C3C(N1)C1=CC=CC=C21	C=CCC12Cc3ccccc3C(N1)c1c2cccc1	70		TCP	Monn et al., 1990
9-iodo-16-azatetracyclo[7.6.1.02,7.010,15]hexadeca-2,4,6,10,12,14-hexaene			C15H12IN			dibenzocycloalkenamine	uncompetitive NMDAR antagonist	PCP-site (ion channel)	IC12CC3=CC=CC=C3C(N1)C1=CC=CC=C21	IC12Cc3ccccc3C(N1)c1c2cccc1	430		TCP	Monn et al., 1990
ethyl 16-azatetracyclo[7.6.1.02,7.010,15]hexadeca-2,4,6,10,12,14-hexaene-9-carboxylate			C18H17NO2			dibenzocycloalkenamine	uncompetitive NMDAR antagonist	PCP-site (ion channel)	CCOC(=O)C12CC3=CC=CC=C3C(N1)C1=CC=CC=C21	CCOC(=O)C12Cc3ccccc3C(N1)c1c2cccc1	7500		TCP	Monn et al., 1990
16-azatetracyclo[7.6.1.02,7.010,15]hexadeca-2,4,6,10,12,14-hexaene-9-carboxamide			C16H14N2O			dibenzocycloalkenamine	uncompetitive NMDAR antagonist	PCP-site (ion channel)	NC(=O)C12CC3=CC=CC=C3C(N1)C1=CC=CC=C21	NC(=O)C12Cc3ccccc3C(N1)c1c2cccc1	11300		TCP	Monn et al., 1990
1-{16-azatetracyclo[7.6.1.02,7.010,15]hexadeca-2,4,6,10,12,14-hexaen-9-yl}methanamine			C16H16N2			dibenzocycloalkenamine	uncompetitive NMDAR antagonist	PCP-site (ion channel)	NCC12CC3=CC=CC=C3C(N1)C1=CC=CC=C21	NCC12Cc3ccccc3C(N1)c1c2cccc1	117		TCP	Monn et al., 1990
{16-azatetracyclo[7.6.1.02,7.010,15]hexadeca-2,4,6,10,12,14-hexaen-9-yl}methanol			C16H15NO			dibenzocycloalkenamine	uncompetitive NMDAR antagonist	PCP-site (ion channel)	OCC12CC3=CC=CC=C3C(N1)C1=CC=CC=C21	OCC12Cc3ccccc3C(N1)c1c2cccc1	40		TCP	Monn et al., 1990
9-(methoxymethyl)-16-azatetracyclo[7.6.1.02,7.010,15]hexadeca-2,4,6,10,12,14-hexaene			C17H17NO			dibenzocycloalkenamine	uncompetitive NMDAR antagonist	PCP-site (ion channel)	COCC12CC3=CC=CC=C3C(N1)C1=CC=CC=C21	COCC12Cc3ccccc3C(N1)c1c2cccc1	300		TCP	Monn et al., 1990
9-[(benzyloxy)methyl]-16-azatetracyclo[7.6.1.02,7.010,15]hexadeca-2,4,6,10,12,14-hexaene			C23H21NO			dibenzocycloalkenamine	uncompetitive NMDAR antagonist	PCP-site (ion channel)	C(OCC12CC3=CC=CC=C3C(N1)C1=CC=CC=C21)C1=CC=CC=C1	c1ccc(cc1)COCC12Cc3ccccc3C(N1)c1c2cccc1	10000		TCP	Monn et al., 1990
9-(bromomethyl)-16-azatetracyclo[7.6.1.02,7.010,15]hexadeca-2,4,6,10,12,14-hexaene			C16H14BrN			dibenzocycloalkenamine	uncompetitive NMDAR antagonist	PCP-site (ion channel)	BrCC12CC3=CC=CC=C3C(N1)C1=CC=CC=C21	BrCC12Cc3ccccc3C(N1)c1c2cccc1	33		TCP	Monn et al., 1990
9-(chloromethyl)-16-azatetracyclo[7.6.1.02,7.010,15]hexadeca-2,4,6,10,12,14-hexaene			C16H14ClN			dibenzocycloalkenamine	uncompetitive NMDAR antagonist	PCP-site (ion channel)	ClCC12CC3=CC=CC=C3C(N1)C1=CC=CC=C21	ClCC12Cc3ccccc3C(N1)c1c2cccc1	12		TCP	Monn et al., 1990
2-{16-azatetracyclo[7.6.1.02,7.010,15]hexadeca-2,4,6,10,12,14-hexaen-9-yl}acetonitrile			C17H14N2			dibenzocycloalkenamine	uncompetitive NMDAR antagonist	PCP-site (ion channel)	N#CCC12CC3=CC=CC=C3C(N1)C1=CC=CC=C21	N#CCC12Cc3ccccc3C(N1)c1c2cccc1	967		TCP	Monn et al., 1990
2-{16-azatetracyclo[7.6.1.02,7.010,15]hexadeca-2,4,6,10,12,14-hexaen-9-yl}ethan-1-amine			C17H18N2			dibenzocycloalkenamine	uncompetitive NMDAR antagonist	PCP-site (ion channel)	NCCC12CC3=CC=CC=C3C(N1)C1=CC=CC=C21	NCCC12Cc3ccccc3C(N1)c1c2cccc1	20		TCP	Monn et al., 1990
16-azatetracyclo[7.6.1.02,7.010,15]hexadeca-2,4,6,10,12,14-hexaene-9-carboxylic acid			C16H13NO2			dibenzocycloalkenamine	uncompetitive NMDAR antagonist	PCP-site (ion channel)	OC(=O)C12CC3=CC=CC=C3C(N1)C1=CC=CC=C21	OC(=O)C12Cc3ccccc3C(N1)c1c2cccc1	32300		TCP	Monn et al., 1990
3-(1-piperidin-1-ylcyclohexyl)aniline	m-NH2-PCP, m-amino-pcp		C17H26N2			arylcyclohexylamine	uncompetitive NMDAR antagonist	PCP-site (ion channel)	C1CCC(CC1)(C2=CC(=CC=C2)N)N3CCCCC3	Nc1cccc(c1)C1(CCCCC1)N1CCCCC1		31	TCP	Largent et al., 1986
1-[1-(2-Methoxyphenyl)cyclohexyl]piperidine	2-MeO-PCP		C18H27NO			arylcyclohexylamine	uncompetitive NMDAR antagonist	PCP-site (ion channel)	COC1=C(C=CC=C1)C1(CCCCC1)N1CCCCC1	COc1ccccc1C1(CCCCC1)N1CCCCC1	147.5 nM Ki	231.6	MK-801	Wallach, 2014
1-[1-(3-methylphenyl)cyclohexyl]piperidine	3-Me-PCP		C18H27N			arylcyclohexylamine	uncompetitive NMDAR antagonist	PCP-site (ion channel)	CC1=CC=CC(=C1)C1(CCCCC1)N1CCCCC1	Cc1cccc(c1)C1(CCCCC1)N1CCCCC1	345, 113 nM Ki	54.6	MK-801, TCP(113 Ki)	Wallach, 2014. Linders et al., 1993.
1‐[1‐(2H‐1,3‐benzodioxol‐5‐yl)cyclohexyl]piperidine	3,4-MD-PCP		C18H25NO2			arylcyclohexylamine, dioxolane	uncompetitive NMDAR antagonist	PCP-site (ion channel)	C1OC2=CC=C(C=C2O1)C1(CCCCC1)N1CCCCC1	C1CCC(CC1)(N1CCCCC1)c1ccc2c(c1)OCO2	62.8 nM Ki	98.6	MK-801	Wallach, 2014
1-[1-(3,4-dihydro-1,4-benzodioxin-6-yl)cyclohexyl]piperidine	3,4-ED-PCP		C19H27NO2			arylcyclohexylamine, dioxane	uncompetitive NMDAR antagonist	PCP-site (ion channel)	C1CCN(CC1)C1(CCCCC1)C1=CC2=C(OCCO2)C=C1	C1CCC(CC1)(N1CCCCC1)c1ccc2c(c1)OCCO2	60.1	94.4	MK-801	Wallach, 2014
1-1-[3-(propan-2-yloxy)phenyl]cyclohexylpiperidine	3-IpO-PCP		C20H31NO			arylcyclohexylamine	uncompetitive NMDAR antagonist	PCP-site (ion channel)	CC(C)OC1=CC=CC(=C1)C1(CCCCC1)N1CCCCC1	CC(Oc1cccc(c1)C1(CCCCC1)N1CCCCC1)C	56.1	88.1	MK-801	Wallach, 2014
1-[1-(3-ethoxyphenyl)cyclohexyl]piperidine	3-EtO-PCP		C19H29NO			arylcyclohexylamine	uncompetitive NMDAR antagonist	PCP-site (ion channel)	CCOC1=CC=CC(=C1)C1(CCCCC1)N1CCCCC1	CCOc1cccc(c1)C1(CCCCC1)N1CCCCC1	111.8	175.5	MK-801	Wallach, 2014
1-[1-(2,3-dihydro-1-benzofuran-6-yl)cyclohexyl]piperidine	4-DHBF-PCP		C19H27NO			arylcyclohexylamine, benzofuran	uncompetitive NMDAR antagonist	PCP-site (ion channel)	C1CC2=C(O1)C=C(C=C2)C1(CCCCC1)N1CCCCC1	C1CCC(CC1)(N1CCCCC1)c1ccc2c(c1)OCC2	75.4	118.3	MK-801	Wallach, 2014
1-[1-(4-methoxy-3-methylphenyl)cyclohexyl]piperidine	3-Me-4-MeO-PCP		C19H29NO			arylcyclohexylamine	uncompetitive NMDAR antagonist	PCP-site (ion channel)	COC1=C(C)C=C(C=C1)C1(CCCCC1)N1CCCCC1	COc1ccc(cc1C)C1(CCCCC1)N1CCCCC1	185.3	290.9	MK-801	Wallach, 2014
1-[1-(3-methoxy-4-methylphenyl)cyclohexyl]piperidine	3-MeO-4-Me-PCP		C19H29NO			arylcyclohexylamine	uncompetitive NMDAR antagonist	PCP-site (ion channel)	COC1=C(C)C=CC(=C1)C1(CCCCC1)N1CCCCC1	COc1cc(ccc1C)C1(CCCCC1)N1CCCCC1	282.8	444	MK-801	Wallach, 2014
1-[1-(4-fluoro-3-methylphenyl)cyclohexyl]piperidine	3-Me-4-F-PCP		C18H26FN			arylcyclohexylamine	uncompetitive NMDAR antagonist	PCP-site (ion channel)	CC1=C(F)C=CC(=C1)C1(CCCCC1)N1CCCCC1	Fc1ccc(cc1C)C1(CCCCC1)N1CCCCC1	44.2	69.3	MK-801	Wallach, 2014
1-1-[3-(trifluoromethoxy)phenyl]cyclohexylpiperidine	3-CF3O-PCP		C18H24F3NO			arylcyclohexylamine	uncompetitive NMDAR antagonist	PCP-site (ion channel)	FC(F)(F)OC1=CC=CC(=C1)C1(CCCCC1)N1CCCCC1	FC(Oc1cccc(c1)C1(CCCCC1)N1CCCCC1)(F)F	1960	3080	MK-801	Wallach, 2014
1‐[1‐(3,5‐dimethoxyphenyl)cyclohexyl]piperidine	3,5-DiMeO-PCP		C19H29NO2			arylcyclohexylamine	uncompetitive NMDAR antagonist	PCP-site (ion channel)	COC1=CC(=CC(OC)=C1)C1(CCCCC1)N1CCCCC1	COc1cc(OC)cc(c1)C1(CCCCC1)N1CCCCC1	1191	1870	MK-801	Wallach, 2014
1‐[1‐(2,5‐dimethoxyphenyl)cyclohexyl]piperidine	2,5-DiMeO-PCP		C19H29NO2			arylcyclohexylamine	uncompetitive NMDAR antagonist	PCP-site (ion channel)	COC1=CC(=C(OC)C=C1)C1(CCCCC1)N1CCCCC1	COc1ccc(cc1C1(CCCCC1)N1CCCCC1)OC	856	1359	MK-801	Wallach, 2014
1-[1-(3-fluorophenyl)cyclohexyl]piperidine	3-F-PCP		C17H24FN			arylcyclohexylamine	uncompetitive NMDAR antagonist	PCP-site (ion channel)	FC1=CC=CC(=C1)C1(CCCCC1)N1CCCCC1	Fc1cccc(c1)C1(CCCCC1)N1CCCCC1	1150	2276	MK-801	Wallach, 2014
1-[1-(2-Methoxyphenyl)cyclohexyl]pyrrolidine	2-MeO-PCPy		C17H25NO			anisylcyclohexylamine	uncompetitive NMDAR antagonist	PCP-site (ion channel)	COC1=C(C=CC=C1)C1(CCCCC1)N1CCCC1	COc1ccccc1C1(CCCCC1)N1CCCC1	338.5	531.4	MK-801	Wallach, 2014
1-[1-(4-Methoxyphenyl)cyclohexyl]pyrrolidine	4-MeO-PCPy		C17H25NO			anisylcyclohexylamine	uncompetitive NMDAR antagonist	PCP-site (ion channel)	COC1=CC=C(C=C1)C1(CCCCC1)N1CCCC1	COc1ccc(cc1)C1(CCCCC1)N1CCCC1	215.7	338.6	MK-801	Wallach, 2014
1-[1-(3-methylphenyl)cyclohexyl] pyrrolidine	3-Me-PCPy		C17H25N			arylcyclohexylamine	uncompetitive NMDAR antagonist	PCP-site (ion channel)	CC1=CC=CC(=C1)C1(CCCCC1)N1CCCC1	Cc1cccc(c1)C1(CCCCC1)N1CCCC1	52	82.2	MK-801	Wallach, 2014
1-[1-(2H-1,3-benzodioxol-5-yl)cyclohexyl] pyrrolidine	3,4-MD-PCPy		C17H23NO2			arylcyclohexylamine, dioxolane	uncompetitive NMDAR antagonist	PCP-site (ion channel)	C1CCN(C1)C1(CCCCC1)C1=CC2=C(OCO2)C=C1	C1CCC(CC1)(N1CCCC1)c1ccc2c(c1)OCO2	47	74	MK-801	Wallach, 2014
1-(1-phenylcycloheptyl)piperidine	PCHEP		C18H27N			arylcycloheptylamine	uncompetitive NMDAR antagonist	PCP-site (ion channel)	C1CCN(CC1)C1(CCCCCC1)C1=CC=CC=C1	C1CCCC(CC1)(N1CCCCC1)c1ccccc1	1100	1730	MK-801	Wallach, 2014 (from Sun data)
1-[1-(3-fluorophenyl)cycloheptyl)piperidine	3-F-PCHEPy		C18H26FN			arylcycloheptylamine	uncompetitive NMDAR antagonist	PCP-site (ion channel)	FC1=CC(=CC=C1)C1(CCCCCC1)N1CCCCC1	Fc1cccc(c1)C1(CCCCCC1)N1CCCCC1	478	750	MK-801	Wallach, 2014 (from Sun data)
1-[1-(4-fluorophenyl)cycloheptyl)piperidine	4-F-PCHEPy		C18H26FN			arylcycloheptylamine	uncompetitive NMDAR antagonist	PCP-site (ion channel)	FC1=CC=C(C=C1)C1(CCCCCC1)N1CCCCC1	Fc1ccc(cc1)C1(CCCCCC1)N1CCCCC1	616	968	MK-801	Wallach, 2014 (from Sun data)
1-(3-fluorophenyl)cycloheptan-1-amine	3-F-PCHEA		C13H18FN			arylcycloheptylamine	uncompetitive NMDAR antagonist	PCP-site (ion channel)	NC1(CCCCCC1)C1=CC=CC(F)=C1	Fc1cccc(c1)C1(N)CCCCCC1	400	628	MK-801	Wallach, 2014 (from Sun data)
1-(4-fluorophenyl)cycloheptan-1-amine	4-F-PCHEA		C13H18FN			arylcycloheptylamine	uncompetitive NMDAR antagonist	PCP-site (ion channel)	NC1(CCCCCC1)C1=CC=C(F)C=C1	NC1(CCCCCC1)c1ccc(cc1)F	896	1410	MK-801	Wallach, 2014 (from Sun data)
1-[1-(3-fluorophenyl)cycloheptyl)pyrrolidine	3-F-PCHEP		C17H24FN			arylcycloheptylamine	uncompetitive NMDAR antagonist	PCP-site (ion channel)	FC1=CC(=CC=C1)C1(CCCCCC1)N1CCCC1	Fc1cccc(c1)C1(CCCCCC1)N1CCCC1	699	1100	MK-801	Wallach, 2014 (from Sun data)
1-[1-(4-fluorophenyl)cycloheptyl)pyrrolidine	4-F-PCHEP		C17H24FN			arylcycloheptylamine	uncompetitive NMDAR antagonist	PCP-site (ion channel)	FC1=CC=C(C=C1)C1(CCCCCC1)N1CCCC1	Fc1ccc(cc1)C1(CCCCCC1)N1CCCC1	6420	10100	MK-801	Wallach, 2014 (from Sun data)
1‐[1‐(thiophen‐2‐yl)bicyclo[2.2.1]heptan‐2‐yl]piperidine	TBCHP		C16H23NS	Exo/Endo mix		arylcycloheptylamine	uncompetitive NMDAR antagonist	PCP-site (ion channel)	C1CC2(CC1CC2N1CCCCC1)C1=CC=CS1	C1CCN(CC1)C1CC2CC1(CC2)c1cccs1	196.8, 63.9(exo), 323.2(endo)	309, 100.4(exo), 507.4(endo)	MK-801	Wallach, 2014
2‐(2‐fluorophenyl)bicyclo[2.2.1]heptan‐2‐amine	2-F-PBCHA		C13H16FN	Exo		arylcycloheptylamine	uncompetitive NMDAR antagonist	PCP-site (ion channel)	NC1(CC2CCC1C2)C1=CC=CC=C1F	Fc1ccccc1C1(N)CC2CC1CC2	2280	3574	MK-801	Wallach, 2014
1-{2‐phenylbicyclo[2.2.1]heptan‐2‐yl}piperidine	PBCHP		C18H25N	Exo		arylcycloheptylamine	uncompetitive NMDAR antagonist	PCP-site (ion channel)	C1CC2CC1CC2(N1CCCCC1)C1=CC=CC=C1	C1CCN(CC1)C1(CC2CC1CC2)c1ccccc1	947.8	1488	MK-801	Wallach, 2014
1‐[2‐(3‐methoxyphenyl)bicyclo[2.2.1]heptan‐2‐yl]piperidine	3-MeO-PBCHP		C19H27NO	Exo		arylcycloheptylamine	uncompetitive NMDAR antagonist	PCP-site (ion channel)	COC1=CC=CC(=C1)C1(CC2CCC1C2)N1CCCCC1	COc1cccc(c1)C1(CC2CC1CC2)N1CCCCC1	85.4	135	MK-801	Wallach, 2014
1‐[2‐(4‐methoxyphenyl)bicyclo[2.2.1]heptan‐2‐yl]piperidine	4-MeO-PBCHP		C19H27NO			arylcycloheptylamine	uncompetitive NMDAR antagonist	PCP-site (ion channel)	COC1=CC=C(C=C1)C1(CC2CCC1C2)N1CCCCC1	COc1ccc(cc1)C1(CC2CC1CC2)N1CCCCC1	2213(exo), 4902(endo)	3474(exo), 7697(endo)	MK-801	Wallach, 2014
1‐[2‐(3‐methylphenyl)bicyclo[2.2.1]heptan‐2‐yl]piperidine	3-Me-PBCHP		C19H27N	Exo		arylcycloheptylamine	uncompetitive NMDAR antagonist	PCP-site (ion channel)	CC1=CC=CC(=C1)C1(CC2CCC1C2)N1CCCCC1	Cc1cccc(c1)C1(CC2CC1CC2)N1CCCCC1	279	437.7	MK-801	Wallach, 2014
1‐[2‐(2H‐1,3‐benzodioxol‐5‐yl)bicyclo[2.2.1]heptan‐2‐yl]piperidine	3,4-MD-PBCHP		C19H25NO2			arylcycloheptylamine	uncompetitive NMDAR antagonist	PCP-site (ion channel)	C1OC2=C(O1)C=C(C=C2)C1(CC2CCC1C2)N1CCCCC1	C1CCN(CC1)C1(CC2CC1CC2)c1ccc2c(c1)OCO2	1968(exo), 4242(endo)	3090(exo), 6660(endo)	MK-801	Wallach, 2014
1-{2‐phenylbicyclo[2.2.1]heptan‐2‐yl}pyrrolidine	PBCHPy		C17H23N	Exo		arylcycloheptylamine	uncompetitive NMDAR antagonist	PCP-site (ion channel)	C1CCN(C1)C1(CC2CCC1C2)C1=CC=CC=C1	c1ccc(cc1)C1(CC2CC1CC2)N1CCCC1	791.7	1243	MK-801	Wallach, 2014
1‐[2‐(3‐methoxyphenyl)bicyclo[2.2.1]heptan‐2‐yl]pyrrolidine	3-MeO-PBCHPy		C18H25NO	Exo		arylcycloheptylamine	uncompetitive NMDAR antagonist	PCP-site (ion channel)	COC1=CC(=CC=C1)C1(CC2CCC1C2)N1CCCC1	COc1cccc(c1)C1(CC2CC1CC2)N1CCCC1	485.8	763.1	MK-801	Wallach, 2014
1‐[2‐(4‐methoxyphenyl)bicyclo[2.2.1]heptan‐2‐yl]pyrrolidine	4-MeO-PBCHPy		C18H25NO			arylcycloheptylamine	uncompetitive NMDAR antagonist	PCP-site (ion channel)	COC1=CC=C(C=C1)C1(CC2CCC1C2)N1CCCC1	COc1ccc(cc1)C1(CC2CC1CC2)N1CCCC1	2578(exo), 4948(endo)	4048(exo), 7769(endo)	MK-801	Wallach, 2014
1‐[2‐(3‐methylphenyl)bicyclo[2.2.1]heptan‐2‐yl]pyrrolidine	3-Me-PBCHPy		C18H25N	Exo		arylcycloheptylamine	uncompetitive NMDAR antagonist	PCP-site (ion channel)	CC1=CC(=CC=C1)C1(CC2CCC1C2)N1CCCC1	Cc1cccc(c1)C1(CC2CC1CC2)N1CCCC1	557.7	875.9	MK-801	Wallach, 2014
1-[2-(2H-1,3-benzodioxol-5-yl)bicyclo[2.2.1]heptan-2-yl] pyrrolidine	3,4-MD-PBCHPy		C18H23NO2			arylcycloheptylamine	uncompetitive NMDAR antagonist	PCP-site (ion channel)	C1CCN(C1)C1(CC2CCC1C2)C1=CC=C2OCOC2=C1	C1CCN(C1)C1(CC2CC1CC2)c1ccc2c(c1)OCO2	1826(exo), 2346(endo)	2863(exo), 3683(endo)	MK-801	Wallach, 2014
1‐[2‐(3‐fluorophenyl)bicyclo[2.2.1]heptan‐2‐yl]pyrrolidine	3-F-PBCHPy		C17H22FN	Exo		arylcycloheptylamine	uncompetitive NMDAR antagonist	PCP-site (ion channel)	FC1=CC(=CC=C1)C1(CC2CCC1C2)N1CCCC1	Fc1cccc(c1)C1(CC2CC1CC2)N1CCCC1	4262	6691	MK-801	Wallach, 2014
1‐[2‐(4‐fluorophenyl)bicyclo[2.2.1]heptan‐2‐yl]pyrrolidine	4-F-PBCHPy		C17H22FN	Exo		arylcycloheptylamine	uncompetitive NMDAR antagonist	PCP-site (ion channel)	FC1=CC=C(C=C1)C1(CC2CCC1C2)N1CCCC1	Fc1ccc(cc1)C1(CC2CC1CC2)N1CCCC1	3639	5713	MK-801	Wallach, 2014
N-ethyl-2-phenylbicyclo[2.2.1]heptan-2-amine	PBCHE		C15H21N	Exo		arylcycloheptylamine	uncompetitive NMDAR antagonist	PCP-site (ion channel)	CCNC1(CC2CCC1C2)C1=CC=CC=C1	CCNC1(CC2CC1CC2)c1ccccc1	397.2	623.7	MK-801	Wallach, 2014
2‐phenyl‐N‐propylbicyclo[2.2.1]heptan‐2‐amine	PBCHPr		C16H23N	Exo		arylcycloheptylamine	uncompetitive NMDAR antagonist	PCP-site (ion channel)	CCCNC1(CC2CCC1C2)C1=CC=CC=C1	CCCNC1(CC2CC1CC2)c1ccccc1	278.2	436.7	MK-801	Wallach, 2014
N‐ethyl‐2‐(3‐methoxyphenyl)bicyclo[2.2.1]heptan‐2‐amine	3-MeO-PBCHE		C16H23NO	Exo		arylcycloheptylamine	uncompetitive NMDAR antagonist	PCP-site (ion channel)	CCNC1(CC2CCC1C2)C1=CC(OC)=CC=C1	CCNC1(CC2CC1CC2)c1cccc(c1)OC	1001	1572	MK-801	Wallach, 2014
2‐(3‐methoxyphenyl)‐N‐propylbicyclo[2.2.1]heptan‐2‐amine	3-MeO-PBCHPr		C17H25NO	Exo		arylcycloheptylamine	uncompetitive NMDAR antagonist	PCP-site (ion channel)	CCCNC1(CC2CCC1C2)C1=CC(OC)=CC=C1	CCCNC1(CC2CC1CC2)c1cccc(c1)OC	519.3	815	MK-801	Wallach, 2014
N‐ethyl‐2‐(3‐methylphenyl)bicyclo[2.2.1]heptan‐2‐amine	3-Me-PBCHE		C16H23N	Exo		arylcycloheptylamine	uncompetitive NMDAR antagonist	PCP-site (ion channel)	CCNC1(CC2CCC1C2)C1=CC(C)=CC=C1	CCNC1(CC2CC1CC2)c1cccc(c1)C	951	1493	MK-801	Wallach, 2014
2‐(3‐methylphenyl)‐N‐propylbicyclo[2.2.1]heptan‐2‐amine	3-Me-PBCHPr		C17H25N	Exo		arylcycloheptylamine	uncompetitive NMDAR antagonist	PCP-site (ion channel)	CCCNC1(CC2CCC1C2)C1=CC(C)=CC=C1	CCCNC1(CC2CC1CC2)c1cccc(c1)C	685.6	1077	MK-801	Wallach, 2014
2‐phenylbicyclo[2.2.1]heptan‐2‐amine	PBCHA		C13H17N			arylcycloheptylamine	uncompetitive NMDAR antagonist	PCP-site (ion channel)	NC1(CC2CCC1C2)C1=CC=CC=C1	NC1(CC2CC1CC2)c1ccccc1	9710	14397	MK-801	Wallach, 2014
1‐[2‐(4‐fluorophenyl)bicyclo[2.2.1]heptan‐2‐yl]piperidine	4-F-PBCHP		C18H24FN	Exo		arylcycloheptylamine	uncompetitive NMDAR antagonist	PCP-site (ion channel)	FC1=CC=C(C=C1)C1(CC2CCC1C2)N1CCCCC1	Fc1ccc(cc1)C1(CC2CC1CC2)N1CCCCC1	9550	13100	MK-801	Wallach, 2014
1-[2-(2‐fluorophenyl)bicyclo[2.2.1]heptan‐2‐yl]piperidine	2-F-PBCHP		C18H24FN	Exo		arylbicycloheptylamine	uncompetitive NMDAR antagonist	PCP-site (ion channel)	FC1=C(C=CC=C1)C1(CC2CCC1C2)N1CCCCC1	Fc1ccccc1C1(CC2CC1CC2)N1CCCCC1		> 10,000 nM IC50	MK-801	Wallach, 2014
1‐{2‐[4‐(trifluoromethyl)phenyl]bicyclo[2.2.1]heptan‐2‐yl}piperidine	4-CF3-PBCHP		C19H24F3N	Exo		arylbicycloheptylamine	uncompetitive NMDAR antagonist	PCP-site (ion channel)	FC(F)(F)C1=CC=C(C=C1)C1(CC2CCC1C2)N1CCCCC1	FC(c1ccc(cc1)C1(CC2CC1CC2)N1CCCCC1)(F)F		> 10,000	MK-801	Wallach, 2014
1-[2-(2‐fluorophenyl)bicyclo[2.2.1]heptan‐2‐yl]pyrrolidine	2-F-PBCHPy		C17H22FN	Exo		arylbicycloheptylamine	uncompetitive NMDAR antagonist	PCP-site (ion channel)	FC1=C(C=CC=C1)C1(CC2CCC1C2)N1CCCC1	Fc1ccccc1C1(CC2CC1CC2)N1CCCC1		> 10,000	MK-801	Wallach, 2014
1‐{2‐[4‐(trifluoromethyl)phenyl]bicyclo[2.2.1]heptan‐2‐yl}pyrrolidine	4-CF3-PBCHPy		C18H22F3N	Exo		arylbicycloheptylamine	uncompetitive NMDAR antagonist	PCP-site (ion channel)	FC(F)(F)C1=CC=C(C=C1)C1(CC2CCC1C2)N1CCCC1	FC(c1ccc(cc1)C1(CC2CC1CC2)N1CCCC1)(F)F		> 10,000	MK-801	Wallach, 2014
1‐phenyl‐1,2,3,4‐tetrahydroisoquinoline			C15H15N			tetrahydroisoquinoline	uncompetitive NMDAR antagonist	PCP-site (ion channel)	C1CC2=C(C=CC=C2)C(N1)C1=CC=CC=C1	c1ccc(cc1)C1NCCc2c1cccc2		1900 nM IC50	TCP	Gray et al., 1989
2-(2-ethoxyethyl)-1‐phenyl‐1,2,3,4‐tetrahydroisoquinoline			C19H23NO			tetrahydroisoquinoline	uncompetitive NMDAR antagonist	PCP-site (ion channel)	CCOCCN1CCC2=C(C=CC=C2)C1C1=CC=CC=C1	CCOCCN1CCc2c(C1c1ccccc1)cccc2		8200	TCP	Gray et al., 1989
2-ethyl-1‐phenyl‐1,2,3,4‐tetrahydroisoquinoline			C17H19N			tetrahydroisoquinoline	uncompetitive NMDAR antagonist	PCP-site (ion channel)	CCN1CCC2=C(C=CC=C2)C1C1=CC=CC=C1	CCN1CCc2c(C1c1ccccc1)cccc2		3800	TCP	Gray et al., 1989
1‐phenyl‐2-propyl-1,2,3,4‐tetrahydroisoquinoline			C18H21N			tetrahydroisoquinoline	uncompetitive NMDAR antagonist	PCP-site (ion channel)	C=CCN1CCC2=C(C=CC=C2)C1C1=CC=CC=C1	C=CCN1CCc2c(C1c1ccccc1)cccc2		2300	TCP	Gray et al., 1989
1-(4-chlorophenyl)-1,2,3,4‐tetrahydroisoquinoline			C15H14ClN			tetrahydroisoquinoline	uncompetitive NMDAR antagonist	PCP-site (ion channel)	ClC1=CC=C(C=C1)C1NCCC2=C1C=CC=C2	Clc1ccc(cc1)C1NCCc2c1cccc2		5300	TCP	Gray et al., 1989
1-(4-fluorophenyl)-1,2,3,4‐tetrahydroisoquinoline			C15H14FN			tetrahydroisoquinoline	uncompetitive NMDAR antagonist	PCP-site (ion channel)	FC1=CC=C(C=C1)C1NCCC2=C1C=CC=C2	Fc1ccc(cc1)C1NCCc2c1cccc2		4900	TCP	Gray et al., 1989
1-(4-methylphenyl)-1,2,3,4‐tetrahydroisoquinoline			C16H17N			tetrahydroisoquinoline	uncompetitive NMDAR antagonist	PCP-site (ion channel)	CC1=CC=C(C=C1)C1NCCC2=C1C=CC=C2	Cc1ccc(cc1)C1NCCc2c1cccc2		9500	TCP	Gray et al., 1989
1-(thiolan-2-yl)-1,2,3,4‐tetrahydroisoquinoline			C13H17NS			tetrahydroisoquinoline	uncompetitive NMDAR antagonist	PCP-site (ion channel)	C1CC2=C(C=CC=C2)C(N1)C1=CC=CS1	c1csc(c1)C1NCCc2c1cccc2		7600	TCP	Gray et al., 1989
1-benzyl-1,2,3,4‐tetrahydroisoquinoline			C16H17N			tetrahydroisoquinoline	uncompetitive NMDAR antagonist	PCP-site (ion channel)	C(C1NCCC2=C1C=CC=C2)C1=CC=CC=C1	c1ccc(cc1)CC1NCCc2c1cccc2		1000	TCP	Gray et al., 1989
1‐cyclohexyl-2-propyl‐1,2,3,4‐tetrahydroisoquinoline			C18H27N			tetrahydroisoquinoline	uncompetitive NMDAR antagonist	PCP-site (ion channel)	C=CCN1CCC2=C(C=CC=C2)C1C1CCCCC1	C=CCN1CCc2c(C1C1CCCCC1)cccc2		6200	TCP	Gray et al., 1989
3‐phenyl‐1,2,3,4‐tetrahydroisoquinoline			C15H15N			tetrahydroisoquinoline	uncompetitive NMDAR antagonist	PCP-site (ion channel)	C1NC(CC2=C1C=CC=C2)C1=CC=CC=C1	c1ccc(cc1)C1NCc2c(C1)cccc2		3900	TCP	Gray et al., 1989
8‐phenyl‐1,2,3,4‐tetrahydroisoquinoline			C15H15N			tetrahydroisoquinoline	uncompetitive NMDAR antagonist	PCP-site (ion channel)	C1CC2=C(CN1)C(=CC=C2)C1=CC=CC=C1	c1ccc(cc1)c1cccc2c1CNCC2		4400	TCP	Gray et al., 1989
1,3-dimethyl-2-propyl‐1,2,3,4‐tetrahydroisoquinoline			C14H21N			tetrahydroisoquinoline	uncompetitive NMDAR antagonist	PCP-site (ion channel)	CC1CC2=C(C=CC=C2)C(C)N1CC=C	C=CCN1C(C)Cc2c(C1C)cccc2		5400	TCP	Gray et al., 1989
7‐phenyl‐4H,5H,6H,7H‐thieno[2,3‐c]pyridine			C13H13NS				uncompetitive NMDAR antagonist	PCP-site (ion channel)	C1CC2=C(SC=C2)C(N1)C1=CC=CC=C1	c1ccc(cc1)C1NCCc2c1scc2		8800	TCP	Gray et al., 1989
7‐(propan-2-yl)‐6-propyl-4H,5H,6H,7H‐thieno[2,3‐c]pyridine			C13H21NS				uncompetitive NMDAR antagonist	PCP-site (ion channel)	CC(C)C1N(CC=C)CCC2=C1SC=C2	C=CCN1CCc2c(C1C(C)C)scc2		8500	TCP	Gray et al., 1989
2-methyl-1‐phenyl‐1,2,3,4‐tetrahydroisoquinoline			C16H17N			tetrahydroisoquinoline	uncompetitive NMDAR antagonist	PCP-site (ion channel)	CN1CCC2=C(C=CC=C2)C1C1=CC=CC=C1	CN1CCc2c(C1c1ccccc1)cccc2		24000	TCP	Gray et al., 1989
1-(propan-2-yl)-1,2,3,4‐tetrahydroisoquinoline			C12H17N			tetrahydroisoquinoline	uncompetitive NMDAR antagonist	PCP-site (ion channel)	CC(C)C1NCCC2=C1C=CC=C2	CC(C1NCCc2c1cccc2)C		11000	TCP	Gray et al., 1989
1-(2-methylpropyl)-1,2,3,4‐tetrahydroisoquinoline			C13H19N			tetrahydroisoquinoline	uncompetitive NMDAR antagonist	PCP-site (ion channel)	CC(C)CC1NCCC2=C1C=CC=C2	CC(CC1NCCc2c1cccc2)C		20000	TCP	Gray et al., 1989
1‐cyclohexyl‐1,2,3,4‐tetrahydroisoquinoline			C15H21N			tetrahydroisoquinoline	uncompetitive NMDAR antagonist	PCP-site (ion channel)	C1CCC(CC1)C1NCCC2=C1C=CC=C2	C1CCC(CC1)C1NCCc2c1cccc2		12000	TCP	Gray et al., 1989
7‐(propan-2-yl)‐4H,5H,6H,7H‐thieno[2,3‐c]pyridine			C10H15NS				uncompetitive NMDAR antagonist	PCP-site (ion channel)	CC(C)C1NCCC2=C1SC=C2	CC(C1NCCc2c1scc2)C		17000	TCP	Gray et al., 1989
6-methyl-7‐(propan-2-yl)‐4H,5H,6H,7H‐thieno[2,3‐c]pyridine			C11H17NS				uncompetitive NMDAR antagonist	PCP-site (ion channel)	CC(C)C1N(C)CCC2=C1SC=C2	CC(C1N(C)CCc2c1scc2)C		17000	TCP	Gray et al., 1989
6-ethyl-7‐(propan-2-yl)‐4H,5H,6H,7H‐thieno[2,3‐c]pyridine			C12H19NS				uncompetitive NMDAR antagonist	PCP-site (ion channel)	CCN1CCC2=C(SC=C2)C1C(C)C	CCN1CCc2c(C1C(C)C)scc2		12000	TCP	Gray et al., 1989
1-(napthalen-2-yl)-1,2,3,4‐tetrahydroisoquinoline			C19H17N			tetrahydroisoquinoline	uncompetitive NMDAR antagonist	PCP-site (ion channel)	C1CC2=C(C=CC=C2)C(N1)C1=CC2=CC=CC=C2C=C1	c1ccc2c(c1)CCNC2c1ccc2c(c1)cccc2		> 30,000 nM IC50	TCP	Gray et al., 1989
4-phenyl-1,2,3,4‐tetrahydroisoquinoline			C15H15N			tetrahydroisoquinoline	uncompetitive NMDAR antagonist	PCP-site (ion channel)	C1NCC2=C(C=CC=C2)C1C1=CC=CC=C1	c1ccc(cc1)C1CNCc2c1cccc2		> 30,000 nM IC50	TCP	Gray et al., 1989
2-methyl‐1,2,3,4‐tetrahydroisoquinoline			C10H13N			tetrahydroisoquinoline	uncompetitive NMDAR antagonist	PCP-site (ion channel)	CN1CCC2=C(C1)C=CC=C2	CN1CCc2c(C1)cccc2		> 30,000 nM IC50	TCP	Gray et al., 1989
2-benzyl-3-methyl-1,2,3,4‐tetrahydroisoquinoline			C17H19N			tetrahydroisoquinoline	uncompetitive NMDAR antagonist	PCP-site (ion channel)	CC1CC2=C(CN1CC1=CC=CC=C1)C=CC=C2	CC1Cc2ccccc2CN1Cc1ccccc1		> 30,000 nM IC50	TCP	Gray et al., 1989
2,3-dimethyl‐1,2,3,4‐tetrahydroisoquinoline			C11H15N			tetrahydroisoquinoline	uncompetitive NMDAR antagonist	PCP-site (ion channel)	CC1CC2=C(CN1C)C=CC=C2	CC1Cc2ccccc2CN1C		> 30,000 nM IC50	TCP	Gray et al., 1989
1,3-dimethyl‐1,2,3,4‐tetrahydroisoquinoline			C11H15N			tetrahydroisoquinoline	uncompetitive NMDAR antagonist	PCP-site (ion channel)	CC1CC2=C(C=CC=C2)C(C)N1	CC1NC(C)c2c(C1)cccc2		> 30,000 nM IC50	TCP	Gray et al., 1989
7‐methyl-4H,5H,6H,7H‐thieno[2,3‐c]pyridine			C8H11NS				uncompetitive NMDAR antagonist	PCP-site (ion channel)	CC1NCCC2=C1SC=C2	CC1NCCc2c1scc2		> 30,000 nM IC50	TCP	Gray et al., 1989
1-phenyl-2,3-dihydro-1H-isoindole			C14H13N				uncompetitive NMDAR antagonist	PCP-site (ion channel)	C1NC(C2=CC=CC=C12)C1=CC=CC=C1	c1ccc(cc1)C1NCc2c1cccc2		> 30,000 nM IC50	TCP	Gray et al., 1989
N-Ethyl-1-phenylcyclohexan-1-amine	PCE	eticyclidine	C14H21N			arylcyclohexylamine	uncompetitive NMDAR antagonist	PCP-site (ion channel)	CCNC1(CCCCC1)c1ccccc1	CCNC1(CCCCC1)c1ccccc1		184, 62, 140	MK-801, PCP (140 val)	Stefek et al., 1990. Kozikowski & Pang, 1990. Zukin & Zukin, 1979.
N,N-diethyl-1-phenylcyclohexan-1-amine	PCDE, PCED		C16H25N			arylcyclohexylamine	uncompetitive NMDAR antagonist	PCP-site (ion channel)	CCN(CC)C1(CCCCC1)C1=CC=CC=C1	CCN(C1(CCCCC1)c1ccccc1)CC		1900	MK-801	Stefek et al., 1990
(1S,9R)-17-azatetracyclo[7.6.2.0^(2,7).0^(10,15)]heptadeca-2,4,6,10,12,14-hexaene	IDDC		C16H15N				uncompetitive NMDAR antagonist	PCP-site (ion channel)	C1[C@@H]2C3=CC=CC=C3[C@@H](CN2)C4=CC=CC=C41	c1ccc2c(c1)C1CNC(C2)c2c1cccc2		52 nM IC50	MK-801	Gee et al., 1994
(1S,9R)-4-fluoro-17-azatetracyclo[7.6.2.0^(2,7).0^(10,15)]heptadeca-2,4,6,10,12,14-hexaene			C16H14FN				uncompetitive NMDAR antagonist	PCP-site (ion channel)	FC1=CC=C2C[C@H]3NC[C@H](C4=CC=CC=C34)C2=C1	Fc1ccc2c(c1)[C@@H]1CN[C@H](C2)c2c1cccc2		29.4 nM IC50	MK-801	Gee et al., 1993
(1S,9R)-4,13-difluoro-17-azatetracyclo[7.6.2.0^(2,7).0^(10,15)]heptadeca-2,4,6,10,12,14-hexaene			C16H13F2N				uncompetitive NMDAR antagonist	PCP-site (ion channel)	FC1=CC=C2C[C@H]3NC[C@@H](C2=C1)C1=CC(F)=CC=C31	Fc1ccc2c(c1)[C@@H]1CN[C@H](C2)c2c1cc(F)cc2		51.2	MK-801	Gee et al., 1993
(1S,9R)-4-bromo-17-azatetracyclo[7.6.2.0^(2,7).0^(10,15)]heptadeca-2,4,6,10,12,14-hexaene			C16H14BrN				uncompetitive NMDAR antagonist	PCP-site (ion channel)	BrC1=CC=C2C[C@H]3NC[C@H](C4=CC=CC=C34)C2=C1	Brc1ccc2c(c1)[C@@H]1CN[C@H](C2)c2c1cccc2		51.7	MK-801	Gee et al., 1993
(1S,9R)-4-chloro-17-azatetracyclo[7.6.2.0^(2,7).0^(10,15)]heptadeca-2,4,6,10,12,14-hexaene			C16H14ClN				uncompetitive NMDAR antagonist	PCP-site (ion channel)	ClC1=CC=C2C[C@H]3NC[C@H](C4=CC=CC=C34)C2=C1	Clc1ccc2c(c1)[C@@H]1CN[C@H](C2)c2c1cccc2		71.3	MK-801	Gee et al., 1993
(1S,9R)-4-methyl-17-azatetracyclo[7.6.2.0^(2,7).0^(10,15)]heptadeca-2,4,6,10,12,14-hexaene			C17H17N				uncompetitive NMDAR antagonist	PCP-site (ion channel)	CC1=CC=C2C[C@H]3NC[C@H](C4=CC=CC=C34)C2=C1	Cc1ccc2c(c1)[C@@H]1CN[C@H](C2)c2c1cccc2		108	MK-801	Gee et al., 1993
(1S,9R)-4-chloro-13-methoxy-17-azatetracyclo[7.6.2.0^(2,7).0^(10,15)]heptadeca-2,4,6,10,12,14-hexaene			C17H16ClNO				uncompetitive NMDAR antagonist	PCP-site (ion channel)	COC1=CC=C2[C@H]3CC4=CC=C(Cl)C=C4[C@H](CN3)C2=C1	COc1ccc2c(c1)[C@H]1CN[C@@H]2Cc2c1cc(Cl)cc2		113	MK-801	Gee et al., 1993
(1S,9R)-4-bromo-13-methoxy-17-azatetracyclo[7.6.2.0^(2,7).0^(10,15)]heptadeca-2,4,6,10,12,14-hexaene			C17H16BrNO				uncompetitive NMDAR antagonist	PCP-site (ion channel)	COC1=CC=C2[C@H]3CC4=CC=C(Br)C=C4[C@H](CN3)C2=C1	COc1ccc2c(c1)[C@H]1CN[C@@H]2Cc2c1cc(Br)cc2		114	MK-801	Gee et al., 1993
(1S,9R)-1-methyl-17-azatetracyclo[7.6.2.0^(2,7).0^(10,15)]heptadeca-2,4,6,10,12,14-hexaene			C17H17N				uncompetitive NMDAR antagonist	PCP-site (ion channel)	C[C@]12CN[C@H](CC3=CC=CC=C13)C1=CC=CC=C21	C[C@]12CN[C@@H](c3c2cccc3)Cc2c1cccc2		119	MK-801	Gee et al., 1993
(1S,9R)-4-iodo-17-azatetracyclo[7.6.2.0^(2,7).0^(10,15)]heptadeca-2,4,6,10,12,14-hexaene			C16H14IN				uncompetitive NMDAR antagonist	PCP-site (ion channel)	IC1=CC=C2C[C@H]3NC[C@H](C4=CC=CC=C34)C2=C1	Ic1ccc2c(c1)[C@@H]1CN[C@H](C2)c2c1cccc2		160	MK-801	Gee et al., 1993
(1S,9R)-4-methoxy-17-azatetracyclo[7.6.2.0^(2,7).0^(10,15)]heptadeca-2,4,6,10,12,14-hexaene			C17H17NO				uncompetitive NMDAR antagonist	PCP-site (ion channel)	COC1=CC=C2C[C@H]3NC[C@@H](C2=C1)C1=CC=CC=C31	COc1ccc2c(c1)[C@@H]1CN[C@H](C2)c2c1cccc2		168	MK-801	Gee et al., 1993
(1S,9R)-13-methoxy-17-azatetracyclo[7.6.2.0^(2,7).0^(10,15)]heptadeca-2,4,6,10,12,14-hexaene			C17H17NO				uncompetitive NMDAR antagonist	PCP-site (ion channel)	COC1=CC=C2[C@H]3CC4=CC=CC=C4[C@H](CN3)C2=C1	COc1ccc2c(c1)[C@H]1CN[C@@H]2Cc2c1cccc2		332	MK-801	Gee et al., 1993
(1S,9R)-4-phenyl-17-azatetracyclo[7.6.2.0^(2,7).0^(10,15)]heptadeca-2,4,6,10,12,14-hexaene			C22H19N				uncompetitive NMDAR antagonist	PCP-site (ion channel)	C1N[C@@H]2CC3=CC=C(C=C3[C@H]1C1=CC=CC=C21)C1=CC=CC=C1	c1ccc(cc1)c1ccc2c(c1)[C@@H]1CN[C@H](C2)c2c1cccc2		421	MK-801	Gee et al., 1993
(1S,9R)-17-azatetracyclo[7.6.2.0^(2,7).0^(10,15)]heptadeca-2,4,6,10,12,14-hexaen-4-amine			C16H16N2				uncompetitive NMDAR antagonist	PCP-site (ion channel)	NC1=CC=C2C[C@H]3NC[C@H](C4=CC=CC=C34)C2=C1	Nc1ccc2c(c1)[C@@H]1CN[C@H](C2)c2c1cccc2		486	MK-801	Gee et al., 1993
(1S,9R)-4-azido-17-azatetracyclo[7.6.2.0^(2,7).0^(10,15)]heptadeca-2,4,6,10,12,14-hexaene			C16H14N2[N-][N+]				uncompetitive NMDAR antagonist	PCP-site (ion channel)	[N-]=[N+]=NC1=CC=C2C[C@H]3NC[C@H](C4=CC=CC=C34)C2=C1	[N-]=[N+]=Nc1ccc2c(c1)[C@@H]1CN[C@H](C2)c2c1cccc2		500	MK-801	Gee et al., 1993
(1S,9R)-4-bromo-13-methoxy-17-methyl-17-azatetracyclo[7.6.2.0^(2,7).0^(10,15)]heptadeca-2,4,6,10,12,14-hexaene			C18H18BrNO				uncompetitive NMDAR antagonist	PCP-site (ion channel)	COC1=CC=C2[C@H]3CC4=CC=C(Br)C=C4[C@H](CN3C)C2=C1	COc1ccc2c(c1)[C@H]1CN([C@@H]2Cc2c1cc(Br)cc2)C		643	MK-801	Gee et al., 1993
(1S,9R)-13-chloro-17-azatetracyclo[7.6.2.0^(2,7).0^(10,15)]heptadeca-2,4,6,10,12,14-hexaene			C16H14ClN				uncompetitive NMDAR antagonist	PCP-site (ion channel)	ClC1=CC=C2[C@H]3CC4=CC=CC=C4[C@H](CN3)C2=C1	Clc1ccc2c(c1)[C@H]1CN[C@@H]2Cc2c1cccc2		690	MK-801	Gee et al., 1993
(1S,9R)-4-bromo-17-methyl-17-azatetracyclo[7.6.2.0^(2,7).0^(10,15)]heptadeca-2,4,6,10,12,14-hexaene			C17H16BrN				uncompetitive NMDAR antagonist	PCP-site (ion channel)	CN1C[C@@H]2C3=CC=CC=C3[C@H]1CC1=CC=C(Br)C=C21	Brc1ccc2c(c1)[C@@H]1CN([C@H](C2)c2c1cccc2)C		1044	MK-801	Gee et al., 1993
(1S,9R)-17-(propan-2-yl)-17-azatetracyclo[7.6.2.0^(2,7).0^(10,15)]heptadeca-2,4,6,10,12,14-hexaene			C19H21N				uncompetitive NMDAR antagonist	PCP-site (ion channel)	CC(C)N1C[C@H]2C3=CC=CC=C3C[C@@H]1C1=CC=CC=C21	CC(N1C[C@H]2c3c(C[C@@H]1c1c2cccc1)cccc3)C		1879	MK-801	Gee et al., 1993
(1S,9R)-4-nitro-17-azatetracyclo[7.6.2.0^(2,7).0^(10,15)]heptadeca-2,4,6,10,12,14-hexaene			C16H14N[N+]O[O-]				uncompetitive NMDAR antagonist	PCP-site (ion channel)	[O-][N+](=O)C1=CC=C2C[C@H]3NC[C@@H](C2=C1)C1=CC=CC=C31	[O-][N+](=O)c1ccc2c(c1)[C@@H]1CN[C@H](C2)c2c1cccc2		4300	MK-801	Gee et al., 1993
1-[(1S,9R)-17-azatetracyclo[7.6.2.0^(2,7).0^(10,15)]heptadeca-2,4,6,10,12,14-hexaen-17-yl]ethan-1-one			C18H17NO				uncompetitive NMDAR antagonist	PCP-site (ion channel)	CC(=O)N1C[C@H]2C3=CC=CC=C3C[C@@H]1C1=CC=CC=C21	CC(=O)N1C[C@H]2c3c(C[C@@H]1c1c2cccc1)cccc3		> 10,000	MK-801	Gee et al., 1993
1-[(1S,9R)-4-nitro-17-azatetracyclo[7.6.2.0^(2,7).0^(10,15)]heptadeca-2,4,6,10,12,14-hexaen-17-yl]ethan-1-one			C18H16N[N+]O2[O-]				uncompetitive NMDAR antagonist	PCP-site (ion channel)	CC(=O)N1C[C@H]2C3=CC(=CC=C3C[C@@H]1C1=CC=CC=C21)[N+]([O-])=O	CC(=O)N1C[C@H]2c3c(C[C@@H]1c1c2cccc1)ccc(c3)[N+](=O)[O-]		> 10,000	MK-801	Gee et al., 1993
(1S,9R)-17-[(pyridin-2-yl)methyl]-17-azatetracyclo[7.6.2.0^(2,7).0^(10,15)]heptadeca-2,4,6,10,12,14-hexaene			C22H20N2				uncompetitive NMDAR antagonist	PCP-site (ion channel)	C(N1C[C@H]2C3=CC=CC=C3C[C@@H]1C1=CC=CC=C21)C1=NC=CC=C1	c1ccc(nc1)CN1C[C@@H]2c3c([C@H]1Cc1c2cccc1)cccc3		> 10,000	MK-801	Gee et al., 1993
1‐[1‐(2‐methylphenyl)cyclohexyl]piperidine			C18H27N			arylcyclohexylamine	uncompetitive NMDAR antagonist	PCP-site (ion channel)	CC1=C(C=CC=C1)C1(CCCCC1)N1CCCCC1	Cc1ccccc1C1(CCCCC1)N1CCCCC1	140 nM Ki		TCP	Linders et al., 1993
1-[1-(4-Methylphenyl)cyclohexyl]piperidine	4-Me-PCP		C18H27N			arylcyclohexylamine	uncompetitive NMDAR antagonist	PCP-site (ion channel)	Cc1ccc(cc1)C1(CCCCC1)N1CCCCC1	Cc1ccc(cc1)C1(CCCCC1)N1CCCCC1	1570		TCP	Linders et al., 1993
1‐{[1,1'‐bi(cyclohexane)]‐1‐yl}piperidine	CCP		C17H31N				uncompetitive NMDAR antagonist	PCP-site (ion channel)	C1CCC(CC1)C1(CCCCC1)N1CCCCC1	C1CCC(CC1)C1(CCCCC1)N1CCCCC1	3600		TCP	Linders et al., 1993
1‐[(1R,2S)‐2‐methyl‐1‐phenylcyclohexyl]piperidine	2-Me-PCP		C18H27N	trans (+)		arylcyclohexylamine	uncompetitive NMDAR antagonist	PCP-site (ion channel)	C[C@H]1CCCC[C@]1(N1CCCCC1)C1=CC=CC=C1	C[C@H]1CCCC[C@]1(N1CCCCC1)c1ccccc1	100		TCP	Linders et al., 1993
1‐[(1S,2R)‐2‐methyl‐1‐phenylcyclohexyl]piperidine	2-Me-PCP		C18H27N	trans (-)		arylcyclohexylamine	uncompetitive NMDAR antagonist	PCP-site (ion channel)	C[C@@H]1CCCC[C@@]1(N1CCCCC1)C1=CC=CC=C1	C[C@@H]1CCCC[C@@]1(N1CCCCC1)c1ccccc1	11		TCP	Linders et al., 1993
1‐(2‐methyl‐1‐phenylcyclohexyl)piperidine	2-Me-PCP		C18H27N	trans (+/-)		arylcyclohexylamine	uncompetitive NMDAR antagonist	PCP-site (ion channel)	CC1CCCCC1(N1CCCCC1)C1=CC=CC=C1	CC1CCCCC1(N1CCCCC1)c1ccccc1	25		TCP	Linders et al., 1993
1‐[(1R,2S)‐2‐ethyl‐1‐phenylcyclohexyl]piperidine	2-Et-PCP		C19H29N	trans (+/-)		arylcyclohexylamine	uncompetitive NMDAR antagonist	PCP-site (ion channel)	CC[C@H]1CCCC[C@]1(N1CCCCC1)C1=CC=CC=C1	CC[C@H]1CCCC[C@]1(N1CCCCC1)c1ccccc1	801		TCP	Linders et al., 1993
1‐[(1R,2R)‐2‐ethyl‐1‐phenylcyclohexyl]piperidine	2-Et-PCP		C19H29N	cis (+/-)		arylcyclohexylamine	uncompetitive NMDAR antagonist	PCP-site (ion channel)	CC[C@@H]1CCCC[C@]1(N1CCCCC1)C1=CC=CC=C1	CC[C@@H]1CCCC[C@]1(N1CCCCC1)c1ccccc1	7500		TCP	Linders et al., 1993
1‐[(1R,3S)‐3‐methyl‐1‐phenylcyclohexyl]piperidine	3-Me-PCP		C18H27N	trans (+)		arylcyclohexylamine	uncompetitive NMDAR antagonist	PCP-site (ion channel)	C[C@H]1CCC[C@](C1)(N1CCCCC1)C1=CC=CC=C1	C[C@H]1CCC[C@](C1)(N1CCCCC1)c1ccccc1	3300		TCP	Linders et al., 1993
1‐[(1S,3R)‐3‐methyl‐1‐phenylcyclohexyl]piperidine	3-Me-PCP		C18H27N	trans (-)		arylcyclohexylamine	uncompetitive NMDAR antagonist	PCP-site (ion channel)	C[C@@H]1CCC[C@@](C1)(N1CCCCC1)C1=CC=CC=C1	C[C@@H]1CCC[C@@](C1)(N1CCCCC1)c1ccccc1	820		TCP	Linders et al., 1993
1‐[(1S,3S)‐3‐methyl‐1‐phenylcyclohexyl]piperidine	3-Me-PCP		C18H27N	cis (+)		arylcyclohexylamine	uncompetitive NMDAR antagonist	PCP-site (ion channel)	C[C@H]1CCC[C@@](C1)(N1CCCCC1)C1=CC=CC=C1	C[C@H]1CCC[C@@](C1)(N1CCCCC1)c1ccccc1	170		TCP	Linders et al., 1993
1‐[(1R,3R)‐3‐methyl‐1‐phenylcyclohexyl]piperidine	3-Me-PCP		C18H27N	cis (-)		arylcyclohexylamine	uncompetitive NMDAR antagonist	PCP-site (ion channel)	C[C@@H]1CCC[C@](C1)(N1CCCCC1)C1=CC=CC=C1	C[C@@H]1CCC[C@](C1)(N1CCCCC1)c1ccccc1	6800		TCP	Linders et al., 1993
1-(4-Methyl-1-phenylcyclohexyl)piperidine	4′-Me-PCP		C18H27N			arylcyclohexylamine	uncompetitive NMDAR antagonist	PCP-site (ion channel)	CC1CCC(CC1)(N1CCCCC1)c1ccccc1	CC1CCC(CC1)(N1CCCCC1)c1ccccc1	617 (trans), 166 (cis)		TCP	Linders et al., 1993
2‐methyl‐1‐(1‐phenylcyclohexyl)piperidine	2'-Me-PCP		C18H27N			arylcyclohexylamine	uncompetitive NMDAR antagonist	PCP-site (ion channel)	CC1CCCCN1C1(CCCCC1)C1=CC=CC=C1	CC1CCCCN1C1(CCCCC1)c1ccccc1	79		TCP	Linders et al., 1993
(3R)-3‐methyl‐1‐(1‐phenylcyclohexyl)piperidine	3'-Me-PCP		C18H27N	(+)		arylcyclohexylamine	uncompetitive NMDAR antagonist	PCP-site (ion channel)	C[C@@H]1CCCN(C1)C1(CCCCC1)C1=CC=CC=C1	C[C@@H]1CCCN(C1)C1(CCCCC1)c1ccccc1	60		TCP	Linders et al., 1993
(3S)-3‐methyl‐1‐(1‐phenylcyclohexyl)piperidine	3'-Me-PCP		C18H27N	(-)		arylcyclohexylamine	uncompetitive NMDAR antagonist	PCP-site (ion channel)	C[C@H]1CCCN(C1)C1(CCCCC1)C1=CC=CC=C1	C[C@H]1CCCN(C1)C1(CCCCC1)c1ccccc1	2150		TCP	Linders et al., 1993
4‐methyl‐1‐(1‐phenylcyclohexyl)piperidine	4'-Me-PCP		C18H27N			arylcyclohexylamine	uncompetitive NMDAR antagonist	PCP-site (ion channel)	CC1CCN(CC1)C1(CCCCC1)C1=CC=CC=C1	CC1CCN(CC1)C1(CCCCC1)c1ccccc1	396		TCP	Linders et al., 1993
1‐methyl‐1‐(1‐phenylcyclohexyl)piperidin‐1‐ium iodide	PCP.MeI		C18H28[I-][N+]			arylcyclohexylamine	uncompetitive NMDAR antagonist	PCP-site (ion channel)	[I-].C[N+]1(CCCCC1)C1(CCCCC1)C1=CC=CC=C1	C[N+]1(CCCCC1)C1(CCCCC1)c1ccccc1.[I-]	1800		TCP	Linders et al., 1993
(1S,9R)-1,16,16-trimethyl-16-azatetracyclo[7.6.1.0^(2,7).0^(10,15)]hexadeca-2,4,6,10,12,14-hexaen-16-ium iodide	N-Me-MK-801.MeI		C18H20[I-][N+]				uncompetitive NMDAR antagonist	PCP-site (ion channel)	[I-].C[C@@]12C3=CC=CC=C3[C@@H](CC3=CC=CC=C13)[N+]2(C)C	C[C@]12c3ccccc3C[C@@H]([N+]2(C)C)c2c1cccc2.[I-]	219		TCP	Linders et al., 1993
8‐[5‐(4‐aminobutyl)thiophen‐2‐yl]octan‐1‐amine	N4T8N		C16H30N2S				uncompetitive NMDAR antagonist	PCP-site (ion channel)	NCCCCCCCCC1=CC=C(CCCCN)S1	NCCCCCCCCc1ccc(s1)CCCCN		520, 330 nM IC50	MK-801	Berger et al., 2015. Berger et al., 1998.
N,N‐bis({2‐[4‐(diaminomethyl)phenoxy]ethyl})benzenesulfonamide			C24H31N5O4S				uncompetitive NMDAR antagonist	PCP-site (ion channel)	NC(N)C1=CC=C(OCCN(CCOC2=CC=C(C=C2)C(N)N)S(=O)(=O)C2=CC=CC=C2)C=C1	NC(c1ccc(cc1)OCCN(S(=O)(=O)c1ccccc1)CCOc1ccc(cc1)C(N)N)N		230	MK-801	Berger et al., 2015
N,N‐bis({2‐[4‐(diaminomethyl)phenoxy]ethyl})‐4‐methylbenzene‐1‐sulfonamide			C25H33N5O4S				uncompetitive NMDAR antagonist	PCP-site (ion channel)	CC1=CC=C(C=C1)S(=O)(=O)N(CCOC1=CC=C(C=C1)C(N)N)CCOC1=CC=C(C=C1)C(N)N	NC(c1ccc(cc1)OCCN(S(=O)(=O)c1ccc(cc1)C)CCOc1ccc(cc1)C(N)N)N		240	MK-801	Berger et al., 2015
{amino[4‐(4‐{4‐[amino(iminiumyl)methyl]phenyl}‐1,4‐diazepan‐1‐yl)phenyl]methylidene}azanium			C19H26N4[N+]2				uncompetitive NMDAR antagonist	PCP-site (ion channel)	NC(=[NH2+])C1=CC=C(C=C1)N1CCCN(CC1)C1=CC=C(C=C1)C(N)=[NH2+]	NC(=[NH2+])c1ccc(cc1)N1CCCN(CC1)c1ccc(cc1)C(=[NH2+])N		250	MK-801	Berger et al., 2015
N'‐(3‐iodophenyl)‐N‐methyl‐N‐(naphthalen‐1‐yl)guanidine	CNS-1261		C18H16IN3				uncompetitive NMDAR antagonist	PCP-site (ion channel)	CN(C(=N)NC1=CC(I)=CC=C1)C1=C2C=CC=CC2=CC=C1	Ic1cccc(c1)NC(=N)N(c1cccc2c1cccc2)C	1.65, 31.9		MK-801(1.65), TCP	Naumiec et al., 2015
N‐{2‐chloro‐5‐[(2‐fluoroethyl)sulfanyl]phenyl}‐N'‐methyl‐N'‐[3‐(methylsulfanyl)phenyl]guanidine	GE-179		C17H19ClFN3S2				uncompetitive NMDAR antagonist	PCP-site (ion channel)	CSC1=CC=CC(=C1)N(C)C(=N)NC1=C(Cl)C=CC(SCCF)=C1	FCCSc1ccc(c(c1)NC(=N)N(c1cccc(c1)SC)C)Cl	0.91		MK-801	Naumiec et al., 2015
N'‐methyl‐N'‐(naphthalen‐1‐yl)‐N‐[3‐(trifluoromethyl)phenyl]guanidine			C19H16F3N3				uncompetitive NMDAR antagonist	PCP-site (ion channel)	CN(C(=N)NC1=CC(=CC=C1)C(F)(F)F)C1=C2C=CC=CC2=CC=C1	N=C(N(c1cccc2c1cccc2)C)Nc1cccc(c1)C(F)(F)F	2.68, 18.3		MK-801(2.68), TCP	Naumiec et al., 2015
N‐[2‐fluoro‐5‐(trifluoromethyl)phenyl]‐N‐methyl‐N'‐(naphthalen‐1‐yl)guanidine			C19H15F4N3				uncompetitive NMDAR antagonist	PCP-site (ion channel)	CN(C(=N)NC1=C2C=CC=CC2=CC=C1)C1=CC(=CC=C1F)C(F)(F)F	N=C(N(c1cc(ccc1F)C(F)(F)F)C)Nc1cccc2c1cccc2	1.29, 13		MK-801(1.29), TCP	Naumiec et al., 2015
N‐[3-bromo‐5‐(trifluoromethyl)phenyl]‐N‐methyl‐N'‐(naphthalen‐1‐yl)guanidine			C19H15BrF3N3				uncompetitive NMDAR antagonist	PCP-site (ion channel)	CN(C(=N)NC1=C2C=CC=CC2=CC=C1)C1=CC(=CC(Br)=C1)C(F)(F)F	Brc1cc(cc(c1)C(F)(F)F)N(C(=N)Nc1cccc2c1cccc2)C	3.42, 45.8		MK-801(3.42), TCP	Naumiec et al., 2015
N‐[2-bromo‐5‐(trifluoromethyl)phenyl]‐N‐methyl‐N'‐(naphthalen‐1‐yl)guanidine			C19H15BrF3N3				uncompetitive NMDAR antagonist	PCP-site (ion channel)	CN(C(=N)NC1=C2C=CC=CC2=CC=C1)C1=CC(=CC=C1Br)C(F)(F)F	N=C(N(c1cc(ccc1Br)C(F)(F)F)C)Nc1cccc2c1cccc2	4.7, 42.9		MK-801(4.7), TCP	Naumiec et al., 2015
N'‐[2‐chloro‐5‐(methylsulfanyl)phenyl]‐N‐methyl‐N‐[3‐(trifluoromethyl)phenyl]guanidine			C16H15ClF3N3S				uncompetitive NMDAR antagonist	PCP-site (ion channel)	CSC1=CC(NC(=N)N(C)C2=CC(=CC=C2)C(F)(F)F)=C(Cl)C=C1	CSc1ccc(c(c1)NC(=N)N(c1cccc(c1)C(F)(F)F)C)Cl	2.79, 14.2		MK-801(2.79), TCP	Naumiec et al., 2015
N'‐[3‐bromo‐5‐(trifluoromethyl)phenyl]‐N‐[2‐chloro‐5‐(trifluoromethyl)phenyl]‐N'‐methylguanidine			C16H11BrClF6N3				uncompetitive NMDAR antagonist	PCP-site (ion channel)	CN(C(=N)NC1=CC(=CC=C1Cl)C(F)(F)F)C1=CC(=CC(Br)=C1)C(F)(F)F	Brc1cc(cc(c1)C(F)(F)F)N(C(=N)Nc1cc(ccc1Cl)C(F)(F)F)C	62		MK-801	Naumiec et al., 2015
N'‐[2‐bromo‐5‐(trifluoromethyl)phenyl]‐N‐[2‐chloro‐5‐(trifluoromethyl)phenyl]‐N'‐methylguanidine			C16H11BrClF6N3				uncompetitive NMDAR antagonist	PCP-site (ion channel)	CN(C(=N)NC1=CC(=CC=C1Cl)C(F)(F)F)C1=CC(=CC=C1Br)C(F)(F)F	Clc1ccc(cc1NC(=N)N(c1cc(ccc1Br)C(F)(F)F)C)C(F)(F)F	233		MK-801	Naumiec et al., 2015
N‐[2‐fluoro‐5‐(trifluoromethyl)phenyl]‐N'‐methyl‐N'‐[3‐methyl‐5‐(trifluoromethyl)phenyl]guanidine			C17H14F7N3				uncompetitive NMDAR antagonist	PCP-site (ion channel)	CN(C(=N)NC1=CC(=CC=C1F)C(F)(F)F)C1=CC(=CC(C)=C1)C(F)(F)F	Cc1cc(cc(c1)C(F)(F)F)N(C(=N)Nc1cc(ccc1F)C(F)(F)F)C	243		MK-801	Naumiec et al., 2015
N‐[2‐bromo‐5‐(trifluoromethyl)phenyl]‐N'‐[3‐fluoro‐5‐(trifluoromethyl)phenyl]‐N'‐methylguanidine			C16H11BrF7N3				uncompetitive NMDAR antagonist	PCP-site (ion channel)	CN(C(=N)NC1=CC(=CC=C1Br)C(F)(F)F)C1=CC(=CC(F)=C1)C(F)(F)F	Fc1cc(cc(c1)C(F)(F)F)N(C(=N)Nc1cc(ccc1Br)C(F)(F)F)C	49		MK-801	Naumiec et al., 2015
N‐[2‐bromo‐5‐(trifluoromethyl)phenyl]‐N'‐methyl‐N'‐[3‐methyl‐5‐(trifluoromethyl)phenyl]guanidine			C17H14BrF6N3				uncompetitive NMDAR antagonist	PCP-site (ion channel)	CN(C(=N)NC1=CC(=CC=C1Br)C(F)(F)F)C1=CC(=CC(C)=C1)C(F)(F)F	Cc1cc(cc(c1)C(F)(F)F)N(C(=N)Nc1cc(ccc1Br)C(F)(F)F)C	29		MK-801	Naumiec et al., 2015
N‐[2‐bromo‐5‐(trifluoromethyl)phenyl]‐N'‐[3‐bromo‐5‐(trifluoromethyl)phenyl]‐N'‐methylguanidine			C16H11Br2F6N3				uncompetitive NMDAR antagonist	PCP-site (ion channel)	CN(C(=N)NC1=CC(=CC=C1Br)C(F)(F)F)C1=CC(=CC(Br)=C1)C(F)(F)F	Brc1cc(cc(c1)C(F)(F)F)N(C(=N)Nc1cc(ccc1Br)C(F)(F)F)C	43		MK-801	Naumiec et al., 2015
N'‐[3‐fluoro‐5‐(trifluoromethyl)phenyl]‐N'‐methyl‐N‐(naphthalen‐1‐yl)guanidine			C19H15F4N3				uncompetitive NMDAR antagonist	PCP-site (ion channel)	CN(C(=N)NC1=C2C=CC=CC2=CC=C1)C1=CC(=CC(F)=C1)C(F)(F)F	Fc1cc(cc(c1)C(F)(F)F)N(C(=N)Nc1cccc2c1cccc2)C	57.2		TCP	Naumiec et al., 2015
N'‐methyl‐N'‐[4‐methyl‐3‐(trifluoromethyl)phenyl]‐N‐(naphthalen‐1‐yl)guanidine			C20H18F3N3				uncompetitive NMDAR antagonist	PCP-site (ion channel)	CN(C(=N)NC1=C2C=CC=CC2=CC=C1)C1=CC(=C(C)C=C1)C(F)(F)F	CN(C(=N)Nc1cccc2c1cccc2)c1ccc(c(c1)C(F)(F)F)C	256		TCP	Naumiec et al., 2015
N'‐methyl‐N'‐[3‐methyl‐5‐(trifluoromethyl)phenyl]‐N‐(naphthalen‐1‐yl)guanidine			C20H18F3N3				uncompetitive NMDAR antagonist	PCP-site (ion channel)	CN(C(=N)NC1=C2C=CC=CC2=CC=C1)C1=CC(=CC(C)=C1)C(F)(F)F	Cc1cc(cc(c1)C(F)(F)F)N(C(=N)Nc1cccc2c1cccc2)C	53		TCP	Naumiec et al., 2015
N'‐methyl‐N'‐[2‐methyl‐5‐(trifluoromethyl)phenyl]‐N‐(naphthalen‐1‐yl)guanidine			C20H18F3N3				uncompetitive NMDAR antagonist	PCP-site (ion channel)	CN(C(=N)NC1=C2C=CC=CC2=CC=C1)C1=CC(=CC=C1C)C(F)(F)F	N=C(N(c1cc(ccc1C)C(F)(F)F)C)Nc1cccc2c1cccc2	104		TCP	Naumiec et al., 2015
(4aR,9aS)‐N‐ethyl‐4,4a,9,9a‐tetrahydro‐1H‐fluoren‐4a‐amine	NEFA		C15H19N				uncompetitive NMDAR antagonist	PCP-site (ion channel)	[H][C@]12CC3=CC=CC=C3[C@]1(CC=CC2)NCC	CCN[C@]12CC=CC[C@H]1Cc1c2cccc1	224		MK-801	Dilmore: Open Channel Block..., Kozikowski & Pang, 1990.
1‐[2‐(3‐fluorophenyl)bicyclo[2.2.1]heptan‐2‐yl]piperidine	3-F-PBCHP		C18H24FN	Exo		arylcycloheptylamine	uncompetitive NMDAR antagonist	PCP-site (ion channel)	FC1=CC(=CC=C1)C1(CC2CCC1C2)N1CCCCC1	Fc1cccc(c1)C1(CC2CC1CC2)N1CCCCC1	17700	27800	MK-801	Wallach, 2014
(2R)-2-[(4R)-2,2-diphenyl-1,3-dioxolan-4-yl]piperidine		levoxadrol	C20H23NO2			dioxolane	uncompetitive NMDAR antagonist	PCP-site (ion channel)	C1CCN[C@H](C1)[C@@H]2COC(O2)(C3=CC=CC=C3)C4=CC=CC=C4	C1CCC(NC1)C1COC(O1)(c1ccccc1)c1ccccc1		16900	TCP	Largent et al., 1986
16-azatetracyclo[7.6.1.02,7.010,15]hexadeca-2,4,6,10,12,14-hexaene-1-carboxamide	ADCI		C16H14N2O			dibenzocycloalkenamine	uncompetitive NMDAR antagonist	PCP-site (ion channel)	NC(=O)C12NC(CC3=CC=CC=C13)C1=CC=CC=C21	NC(=O)C12NC(c3c2cccc3)Cc2c1cccc2		11300	TCP	Rogawski et al., 1991
{3-[(1S,9R)-17-azatetracyclo[7.6.2.0^(2,7).0^(10,15)]heptadeca-2,4,6,10,12,14-hexaen-17-yl]propyl}dimethylamine			C21H26N2				uncompetitive NMDAR antagonist	PCP-site (ion channel)	CN(C)CCCN1C[C@H]2C3=CC=CC=C3C[C@@H]1C1=CC=CC=C21	CN(CCCN1C[C@@H]2c3c([C@H]1Cc1c2cccc1)cccc3)C		12,000 nM IC50	MK-801	Gee et al., 1993
(2S)‐2‐[(4'S)‐10H‐spiro[anthracene‐9,2'‐[1,3]dioxolan]‐4'‐yl]piperidine			C21H23NO2			dioxolane	uncompetitive NMDAR antagonist	PCP-site (ion channel)	C1OC2(O[C@H]1[C@@H]1CCCCN1)C1=CC=CC=C1CC1=C2C=CC=C1	C1CC[C@H](NC1)[C@H]1COC2(O1)c1ccccc1Cc1c2cccc1	15,500 nM Ki		TCP	Sax & Wünsch, 2006
(2S)‐2‐[(4S)‐2,2‐diphenyl‐1,3‐dioxolan‐4‐yl]‐1‐(prop‐2‐en‐1‐yl)piperidine			C23H27NO2			dioxolane	uncompetitive NMDAR antagonist	PCP-site (ion channel)	C=CCN1CCCC[C@H]1[C@H]1COC(O1)(C1=CC=CC=C1)C1=CC=CC=C1	C=CCN1CCCC[C@H]1[C@H]1COC(O1)(c1ccccc1)c1ccccc1	15,200 nM Ki		TCP	Sax & Wünsch, 2006
[2‐(2,2‐diphenyl‐1,3‐dioxan‐4‐yl)methyl]dimethylamine			C19H23NO2	(+/-)		dioxane	uncompetitive NMDAR antagonist	PCP-site (ion channel)	CN(C)CC1CCOC(O1)(C1=CC=CC=C1)C1=CC=CC=C1	CN(CC1CCOC(O1)(c1ccccc1)c1ccccc1)C	29,800 nM Ki		TCP	Sax & Wünsch, 2006
(2S)‐1‐benzyl‐2‐[(4S)‐2,2‐diphenyl‐1,3‐dioxolan‐4‐yl]piperidine			C27H29NO2			dioxolane	uncompetitive NMDAR antagonist	PCP-site (ion channel)	C(N1CCCC[C@H]1[C@H]1COC(O1)(C1=CC=CC=C1)C1=CC=CC=C1)C1=CC=CC=C1	c1ccc(cc1)CN1CCCC[C@H]1[C@H]1COC(O1)(c1ccccc1)c1ccccc1	10,100 nM Ki		TCP	Sax & Wünsch, 2006
[2‐(2,2‐diphenyl‐1,3‐dioxolan‐4‐yl)ethyl](methyl)amine			C18H21NO2	(+/-)		dioxolane	uncompetitive NMDAR antagonist	PCP-site (ion channel)	CNCCC1COC(O1)(C1=CC=CC=C1)C1=CC=CC=C1	CNCCC1COC(O1)(c1ccccc1)c1ccccc1	12,900 nM Ki		TCP	Sax & Wünsch, 2006
(2S)‐2‐[(4S)‐2,2‐diethyl‐1,3‐dioxolan‐4‐yl]piperidine			C12H23NO2			dioxolane	uncompetitive NMDAR antagonist	PCP-site (ion channel)	CCC1(CC)OC[C@@H](O1)[C@@H]1CCCCN1	CCC1(CC)OC[C@@H](O1)[C@@H]1CCCCN1	87,000 nM Ki		TCP	Sax & Wünsch, 2006
[2‐(2,2‐diphenyl‐1,3‐dioxolan‐4‐yl)ethyl]dimethylamine			C19H23NO2	(+/-)		dioxolane	uncompetitive NMDAR antagonist	PCP-site (ion channel)	CN(C)CCC1COC(O1)(C1=CC=CC=C1)C1=CC=CC=C1	CN(CCC1COC(O1)(c1ccccc1)c1ccccc1)C	30,100 nM Ki		TCP	Sax & Wünsch, 2006
(4aR,9aS)‐4,4a,9,9a‐tetrahydro‐1H‐fluoren‐4a‐amine			C13H15N				uncompetitive NMDAR antagonist	PCP-site (ion channel)	[H][C@]12CC3=C(C=CC=C3)[C@@]1(N)CC=CC2	N[C@]12CC=CC[C@H]1Cc1c2cccc1		114	MK-801	Kozikowski & Pang, 1990.
(4aS,9aR)‐4,4a,9,9a‐tetrahydro‐1H‐fluoren‐4a‐amine			C13H15N				uncompetitive NMDAR antagonist	PCP-site (ion channel)	[H][C@@]12CC3=C(C=CC=C3)[C@]1(N)CC=CC2	N[C@@]12CC=CC[C@@H]1Cc1c2cccc1		2241	MK-801	Kozikowski & Pang, 1990.
(4aS,9aR)‐2,3,4,4a,9,9a‐hexahydro‐1H‐fluoren‐4a‐amine			C13H17N				uncompetitive NMDAR antagonist	PCP-site (ion channel)	[H][C@@]12CC3=C(C=CC=C3)[C@]1(N)CCCC2	N[C@@]12CCCC[C@@H]1Cc1c2cccc1		1391	MK-801	Kozikowski & Pang, 1990.
(4aS,9aR)‐N-ethyl-4,4a,9,9a‐tetrahydro‐1H‐fluoren‐4a‐amine			C15H19N				uncompetitive NMDAR antagonist	PCP-site (ion channel)	[H][C@@]12CC3=C(C=CC=C3)[C@@]1(CC=CC2)NCC	CCN[C@@]12CC=CC[C@@H]1Cc1c2cccc1		676	MK-801	Kozikowski & Pang, 1990.
(4aS,9aR)-N‐ethyl‐2,3,4,4a,9,9a‐hexahydro‐1H‐fluoren‐4a‐amine			C15H21N				uncompetitive NMDAR antagonist	PCP-site (ion channel)	[H][C@@]12CC3=C(C=CC=C3)[C@@]1(CCCC2)NCC	CCN[C@@]12CCCC[C@@H]1Cc1c2cccc1		546	MK-801	Kozikowski & Pang, 1990.
1-[1-(Thiophen-2-yl)cyclohexyl]pyrrolidine	TCPy, THP		C14H21NS			arylcyclohexylamine	uncompetitive NMDAR antagonist	PCP-site (ion channel)	C1CCC(CC1)(N1CCCC1)c1cccs1	C1CCC(CC1)(N1CCCC1)c1cccs1		300	PCP	Zukin & Zukin, 1979.
4‐[1‐(thiophen‐2‐yl)cyclohexyl]morpholine	TCM		C14H21NOS				uncompetitive NMDAR antagonist	PCP-site (ion channel)	C1CCC(CC1)(N1CCOCC1)C1=CC=CS1	C1CCC(CC1)(N1CCOCC1)c1cccs1		1600	PCP	Zukin & Zukin, 1979.
1‐(piperidin‐1‐yl)cyclohexane‐1‐carbonitrile	PCC		C12H20N23				uncompetitive NMDAR antagonist	PCP-site (ion channel)	N#CC1(CCCCC1)N1CCCCC1	N#CC1(CCCCC1)N1CCCCC1		5500	PCP	Zukin & Zukin, 1979. Albuquerque: The behavioral effects...
1-(4-pyrrolidin-1-ylbut-2-ynyl)pyrrolidin-2-one		oxotremorine	C12H18N2O				uncompetitive NMDAR antagonist	PCP-site (ion channel)	C1CCN(C1)CC#CCN2CCCC2=O	O=C1CCCN1CC#CCN1CCCC1		71000	PCP	Zukin & Zukin, 1979.
methyl 1-methyl-3,6-dihydro-2H-pyridine-5-carboxylate		arecoline	C8H13NO2				uncompetitive NMDAR antagonist	PCP-site (ion channel)	CN1CCC=C(C1)C(=O)OC	COC(=O)C1=CCCN(C1)C		80000	PCP	Zukin & Zukin, 1979.
(–)-(S)-3-Hydroxy-2-phenylpropionic acid (1R,2R,4S,5S,7α,9S)-9-methyl-3-oxa-9-azatricyclo[3.3.1.0^(2,4)]non-7-yl ester		scopolamine, hyoscine	C17H21NO4				uncompetitive NMDAR antagonist	PCP-site (ion channel)	OC[C@H](c1ccccc1)C(=O)O[C@@H]2C[C@H]3N(C)[C@@H](C2)[C@@H]4O[C@H]34	OC[C@H](c1ccccc1)C(=O)O[C@@H]1C[C@H]2N([C@@H](C1)[C@H]1[C@@H]2O1)C		92000	PCP	Zukin & Zukin, 1979.
N,N,N‐trimethyl‐1‐phenylcyclohexan‐1‐aminium			C15H24[N+]				uncompetitive NMDAR antagonist	PCP-site (ion channel)		C[N+](C1(CCCCC1)c1ccccc1)(C)C	14300		TCP	Thurkauf et al., 1990
1,2,3,4,4a,9,10,10a‐octahydrophenanthren‐4a‐amine			C14H19N			Octahydrophenanthrenamine	uncompetitive NMDAR antagonist	PCP-site (ion channel)	NC12CCCCC1CCC1=C2C=CC=C1	NC12CCCCC1CCc1c2cccc1		25.4	TCP	Bigge et al., 1993
(4aR,10aS)-1,2,3,4,4a,9,10,10a‐octahydrophenanthren‐4a‐amine			C14H19N			Octahydrophenanthrenamine	uncompetitive NMDAR antagonist	PCP-site (ion channel)	[H][C@@]12CCCC[C@]1(N)C1=C(CC2)C=CC=C1	N[C@]12CCCC[C@H]1CCc1c2cccc1		11.3	TCP	Bigge et al., 1993
(4aS,10aR)-1,2,3,4,4a,9,10,10a‐octahydrophenanthren‐4a‐amine			C14H19N			Octahydrophenanthrenamine	uncompetitive NMDAR antagonist	PCP-site (ion channel)	[H][C@]12CCCC[C@@]1(N)C1=C(CC2)C=CC=C1	N[C@@]12CCCC[C@@H]1CCc1c2cccc1		113	TCP	Bigge et al., 1993
1,4,4a,9,10,10a‐hexahydrophenanthren‐4a‐amine			C14H17N			Octahydrophenanthrenamine	uncompetitive NMDAR antagonist	PCP-site (ion channel)	NC12CC=CCC1CCC1=C2C=CC=C1	NC12CC=CCC1CCc1c2cccc1		87.5	TCP	Bigge et al., 1993
N-methyl-1,2,3,4,4a,9,10,10a‐octahydrophenanthren‐4a‐amine			C15H21N			Octahydrophenanthrenamine	uncompetitive NMDAR antagonist	PCP-site (ion channel)	CNC12CCCCC1CCC1=C2C=CC=C1	CNC12CCCCC1CCc1c2cccc1		14.7	TCP	Bigge et al., 1993
(4aS,10aR)-N-methyl-1,2,3,4,4a,9,10,10a‐octahydrophenanthren‐4a‐amine			C15H21N			Octahydrophenanthrenamine	uncompetitive NMDAR antagonist	PCP-site (ion channel)	[H][C@]12CCCC[C@@]1(NC)C1=C(CC2)C=CC=C1	CN[C@@]12CCCC[C@@H]1CCc1c2cccc1		41.5	TCP	Bigge et al., 1993
N-methyl-1,4,4a,9,10,10a‐hexahydrophenanthren‐4a‐amine			C15H19N			Octahydrophenanthrenamine	uncompetitive NMDAR antagonist	PCP-site (ion channel)	CNC12CC=CCC1CCC1=C2C=CC=C1	CNC12CC=CCC1CCc1c2cccc1		27.3	TCP	Bigge et al., 1993
N,N-dimethyl-1,2,3,4,4a,9,10,10a‐octahydrophenanthren‐4a‐amine			C16H23N			Octahydrophenanthrenamine	uncompetitive NMDAR antagonist	PCP-site (ion channel)	CN(C)C12CCCCC1CCC1=C2C=CC=C1	CN(C12CCCCC1CCc1c2cccc1)C		21	TCP	Bigge et al., 1993
N-ethyl-1,2,3,4,4a,9,10,10a‐octahydrophenanthren‐4a‐amine			C16H23N			Octahydrophenanthrenamine	uncompetitive NMDAR antagonist	PCP-site (ion channel)	CCNC12CCCCC1CCC1=C2C=CC=C1	CCNC12CCCCC1CCc1c2cccc1		199	TCP	Bigge et al., 1993
N-(prop-2-en-1-yl)-1,2,3,4,4a,9,10,10a‐octahydrophenanthren‐4a‐amine			C17H23N			Octahydrophenanthrenamine	uncompetitive NMDAR antagonist	PCP-site (ion channel)	C=CCNC12CCCCC1CCC1=C2C=CC=C1	C=CCNC12CCCCC1CCc1c2cccc1		86	TCP	Bigge et al., 1993
4b‐amino‐4b,5,6,7,8,8a,9,10‐octahydrophenanthren‐3‐ol			C14H19NO			Octahydrophenanthrenamine	uncompetitive NMDAR antagonist	PCP-site (ion channel)	NC12CCCCC1CCC1=C2C=C(O)C=C1	Oc1ccc2c(c1)C1(N)CCCCC1CC2		7.5	TCP	Bigge et al., 1993
4b‐amino‐4b,5,8,8a,9,10‐hexahydrophenanthren‐3‐ol			C14H17NO			Octahydrophenanthrenamine	uncompetitive NMDAR antagonist	PCP-site (ion channel)	NC12CC=CCC1CCC1=C2C=C(O)C=C1	Oc1ccc2c(c1)C1(N)CC=CCC1CC2		28	TCP	Bigge et al., 1993
6‐methoxy‐1,2,3,4,4a,9,10,10a‐octahydrophenanthren‐4a‐amine			C15H21NO			Octahydrophenanthrenamine	uncompetitive NMDAR antagonist	PCP-site (ion channel)	COC1=CC2=C(CCC3CCCCC23N)C=C1	COc1ccc2c(c1)C1(N)CCCCC1CC2		18	TCP	Bigge et al., 1993
6‐methoxy‐1,4,4a,9,10,10a‐hexahydrophenanthren‐4a‐amine			C15H19NO			Octahydrophenanthrenamine	uncompetitive NMDAR antagonist	PCP-site (ion channel)	COC1=CC2=C(CCC3CC=CCC23N)C=C1	COc1ccc2c(c1)C1(N)CC=CCC1CC2		46	TCP	Bigge et al., 1993
4b‐(methylamino)‐4b,5,6,7,8,8a,9,10‐octahydrophenanthren‐3‐ol			C15H21NO			Octahydrophenanthrenamine	uncompetitive NMDAR antagonist	PCP-site (ion channel)	CNC12CCCCC1CCC1=C2C=C(O)C=C1	CNC12CCCCC1CCc1c2cc(O)cc1		2.07	TCP	Bigge et al., 1993
6‐methoxy-N-methyl‐1,2,3,4,4a,9,10,10a‐octahydrophenanthren‐4a‐amine			C16H23NO			Octahydrophenanthrenamine	uncompetitive NMDAR antagonist	PCP-site (ion channel)	CNC12CCCCC1CCC1=C2C=C(OC)C=C1	CNC12CCCCC1CCc1c2cc(OC)cc1		5.8	TCP	Bigge et al., 1993
6‐methoxy-N-methyl‐1,4,4a,9,10,10a‐hexahydrophenanthren‐4a‐amine			C16H21NO			Octahydrophenanthrenamine	uncompetitive NMDAR antagonist	PCP-site (ion channel)	CNC12CC=CCC1CCC1=C2C=C(OC)C=C1	CNC12CC=CCC1CCc1c2cc(OC)cc1		21	TCP	Bigge et al., 1993
6‐methoxy‐N,8‐dimethyl‐1,4,4a,9,10,10a‐hexahydrophenanthren‐4a‐amine			C17H23NO			Octahydrophenanthrenamine	uncompetitive NMDAR antagonist	PCP-site (ion channel)	CNC12CC=CCC1CCC1=C2C=C(OC)C=C1C	CNC12CC=CCC1CCc1c2cc(OC)cc1C		53.5	TCP	Bigge et al., 1993
9‐methyl‐1,2,3,4,4a,9,10,10a‐octahydrophenanthren‐4a‐amine			C15H21N			Octahydrophenanthrenamine	uncompetitive NMDAR antagonist	PCP-site (ion channel)	CC1CC2CCCCC2(N)C2=C1C=CC=C2	CC1CC2CCCCC2(c2c1cccc2)N		508	TCP	Bigge et al., 1993
9‐methyl‐1,4,4a,9,10,10a‐hexahydrophenanthren‐4a‐amine			C15H19N			Octahydrophenanthrenamine	uncompetitive NMDAR antagonist	PCP-site (ion channel)	CC1CC2CC=CCC2(N)C2=C1C=CC=C2	CC1CC2CC=CCC2(c2c1cccc2)N		2460	TCP	Bigge et al., 1993
N,9‐dimethyl‐1,2,3,4,4a,9,10,10a‐octahydrophenanthren‐4a‐amine			C16H23N			Octahydrophenanthrenamine	uncompetitive NMDAR antagonist	PCP-site (ion channel)	CNC12CCCCC1CC(C)C1=C2C=CC=C1	CNC12CCCCC1CC(c1c2cccc1)C		317	TCP	Bigge et al., 1993
N,9‐dimethyl‐1,4,4a,9,10,10a‐hexahydrophenanthren‐4a‐amine			C16H21N			Octahydrophenanthrenamine	uncompetitive NMDAR antagonist	PCP-site (ion channel)	CNC12CC=CCC1CC(C)C1=C2C=CC=C1	CNC12CC=CCC1CC(c1c2cccc1)C		654	TCP	Bigge et al., 1993
9,9‐dimethyl‐1,2,3,4,4a,9,10,10a‐octahydrophenanthren‐4a‐amine			C16H23N			Octahydrophenanthrenamine	uncompetitive NMDAR antagonist	PCP-site (ion channel)	CC1(C)CC2CCCCC2(N)C2=C1C=CC=C2	NC12CCCCC1CC(c1c2cccc1)(C)C		37000	TCP	Bigge et al., 1993
N,9,9‐trimethyl‐1,2,3,4,4a,9,10,10a‐octahydrophenanthren‐4a‐amine			C17H25N			Octahydrophenanthrenamine	uncompetitive NMDAR antagonist	PCP-site (ion channel)	CNC12CCCCC1CC(C)(C)C1=C2C=CC=C1	CNC12CCCCC1CC(c1c2cccc1)(C)C		20800	TCP	Bigge et al., 1993
4a‐(methylamino)‐1,2,3,4,4a,9,10,10a‐octahydrophenanthren‐9‐ol			C15H21NO			Octahydrophenanthrenamine	uncompetitive NMDAR antagonist	PCP-site (ion channel)	CNC12CCCCC1CC(O)C1=C2C=CC=C1	CNC12CCCCC1CC(c1c2cccc1)O		1490	TCP	Bigge et al., 1993
4a‐(methylamino)‐1,2,3,4,4a,9,10,10a‐octahydrophenanthren‐3‐ol			C15H21NO			Octahydrophenanthrenamine	uncompetitive NMDAR antagonist	PCP-site (ion channel)	CNC12CC(O)CCC1CCC1=C2C=CC=C1	CNC12CC(O)CCC1CCc1c2cccc1		500	TCP	Bigge et al., 1993
6H,6aH,7H,8H,9H,10H,10aH‐benzo[c]isothiochromen‐10a‐amine			C13H17NS			Octahydrophenanthrenamine	uncompetitive NMDAR antagonist	PCP-site (ion channel)	NC12CCCCC1CSC1=C2C=CC=C1	NC12CCCCC1CSc1c2cccc1		80.6	TCP	Bigge et al., 1993
6H,6aH,7H,10H,10aH‐benzo[c]isothiochromen‐10a‐amine			C13H15NS			Octahydrophenanthrenamine	uncompetitive NMDAR antagonist	PCP-site (ion channel)	NC12CC=CCC1CSC1=C2C=CC=C1	NC12CC=CCC1CSc1c2cccc1		101	TCP	Bigge et al., 1993
N‐methyl‐6H,6aH,7H,8H,9H,10H,10aH‐benzo[c]isothiochromen‐10a‐amine			C14H19NS			Octahydrophenanthrenamine	uncompetitive NMDAR antagonist	PCP-site (ion channel)	CNC12CCCCC1CSC1=C2C=CC=C1	CNC12CCCCC1CSc1c2cccc1		62	TCP	Bigge et al., 1993
(6aR,10aR)-N‐methyl‐6H,6aH,7H,8H,9H,10H,10aH‐benzo[c]isothiochromen‐10a‐amine			C14H19NS			Octahydrophenanthrenamine	uncompetitive NMDAR antagonist	PCP-site (ion channel)	[H][C@@]12CCCC[C@]1(NC)C1=C(SC2)C=CC=C1	CN[C@]12CCCC[C@H]1CSc1c2cccc1		30	TCP	Bigge et al., 1993
(6aS,10aS)-N‐methyl‐6H,6aH,7H,8H,9H,10H,10aH‐benzo[c]isothiochromen‐10a‐amine			C14H19NS			Octahydrophenanthrenamine	uncompetitive NMDAR antagonist	PCP-site (ion channel)	[H][C@]12CCCC[C@@]1(NC)C1=C(SC2)C=CC=C1	CN[C@@]12CCCC[C@@H]1CSc1c2cccc1		199	TCP	Bigge et al., 1993
N‐methyl‐6H,6aH,7H,10H,10aH‐benzo[c]isothiochromen‐10a‐amine			C14H17NS			Octahydrophenanthrenamine	uncompetitive NMDAR antagonist	PCP-site (ion channel)	CNC12CC=CCC1CSC1=C2C=CC=C1	CNC12CC=CCC1CSc1c2cccc1		69	TCP	Bigge et al., 1993
N‐ethyl‐6H,6aH,7H,8H,9H,10H,10aH‐benzo[c]isothiochromen‐10a‐amine			C15H21NS			Octahydrophenanthrenamine	uncompetitive NMDAR antagonist	PCP-site (ion channel)	CCNC12CCCCC1CSC1=C2C=CC=C1	CCNC12CCCCC1CSc1c2cccc1		523	TCP	Bigge et al., 1993
6H,6aH,7H,8H,9H,10H,10aH‐benzo[c]isochromen‐10a‐amine			C13H17NO			Octahydrophenanthrenamine	uncompetitive NMDAR antagonist	PCP-site (ion channel)	NC12CCCCC1COC1=C2C=CC=C1	NC12CCCCC1COc1c2cccc1		178	TCP	Bigge et al., 1993
6H,6aH,7H,10H,10aH‐benzo[c]isochromen‐10a‐amine			C13H15NO			Octahydrophenanthrenamine	uncompetitive NMDAR antagonist	PCP-site (ion channel)	NC12CC=CCC1COC1=C2C=CC=C1	NC12CC=CCC1COc1c2cccc1		399	TCP	Bigge et al., 1993
N-methyl-6H,6aH,7H,8H,9H,10H,10aH‐benzo[c]isochromen‐10a‐amine			C14H19NO			Octahydrophenanthrenamine	uncompetitive NMDAR antagonist	PCP-site (ion channel)	CNC12CCCCC1COC1=C2C=CC=C1	CNC12CCCCC1COc1c2cccc1		113	TCP	Bigge et al., 1993
N-methyl-6H,6aH,7H,10H,10aH‐benzo[c]isochromen‐10a‐amine			C14H17NO			Octahydrophenanthrenamine	uncompetitive NMDAR antagonist	PCP-site (ion channel)	CNC12CC=CCC1COC1=C2C=CC=C1	CNC12CC=CCC1COc1c2cccc1		122	TCP	Bigge et al., 1993
4H,5H,5aH,6H,7H,8H,9H,9aH‐naphtho[2,1‐b]thiophen‐9a‐amine			C12H17NS			Octahydrophenanthrenamine	uncompetitive NMDAR antagonist	PCP-site (ion channel)	NC12CCCCC1CCC1=C2C=CS1	NC12CCCCC1CCc1c2ccs1		43	TCP	Bigge et al., 1993
N-methyl-4H,5H,5aH,6H,7H,8H,9H,9aH‐naphtho[2,1‐b]thiophen‐9a‐amine			C13H19NS			Octahydrophenanthrenamine	uncompetitive NMDAR antagonist	PCP-site (ion channel)	CNC12CCCCC1CCC1=C2C=CS1	CNC12CCCCC1CCc1c2ccs1		31	TCP	Bigge et al., 1993
N‐methyl‐4H,5H,5aH,6H,9H,9aH‐naphtho[2,1‐b]thiophen‐9a‐amine			C13H17NS			Octahydrophenanthrenamine	uncompetitive NMDAR antagonist	PCP-site (ion channel)	CNC12CC=CCC1CCC1=C2C=CS1	CNC12CC=CCC1CCc1c2ccs1		57	TCP	Bigge et al., 1993
3',4'‐dihydro‐1'H‐spiro[cyclohexane‐1,2'‐naphthalen]‐1'‐amine			C15H21N			Spirotetrahydronaphthalenamine	uncompetitive NMDAR antagonist	PCP-site (ion channel)	NC1C2=C(CCC11CCCCC1)C=CC=C2	NC1c2ccccc2CCC21CCCCC2		3400	TCP	Bigge et al., 1993
16-methyl-16-azatetracyclo[7.6.1.02,7.010,15]hexadeca-2,4,6,10,12,14-hexaene			C16H15N				uncompetitive NMDAR antagonist	PCP-site (ion channel)	CN1C2CC3=CC=CC=C3C1C1=CC=CC=C21	CN1C2Cc3c(C1c1c2cccc1)cccc3	12000		MK-801	Thompson et al., 1990
2-{16-azatetracyclo[7.6.1.02,7.010,15]hexadeca-2,4,6,10,12,14-hexaen-16-yl}ethan-1-ol			C17H17NO				uncompetitive NMDAR antagonist	PCP-site (ion channel)	OCCN1C2CC3=CC=CC=C3C1C1=CC=CC=C21	OCCN1C2Cc3c(C1c1c2cccc1)cccc3	71000		MK-801	Thompson et al., 1990
1-propyl-16-azatetracyclo[7.6.1.02,7.010,15]hexadeca-2,4,6,10,12,14-hexaene			C18H19N				uncompetitive NMDAR antagonist	PCP-site (ion channel)	CCCC12NC(CC3=CC=CC=C13)C1=CC=CC=C21	CCCC12NC(c3c2cccc3)Cc2c1cccc2	8600		MK-801	Thompson et al., 1990
1-(2-hydroxyethyl)-16-azatetracyclo[7.6.1.02,7.010,15]hexadeca-2,4,6,10,12,14-hexaen-9-ol			C17H17NO2				uncompetitive NMDAR antagonist	PCP-site (ion channel)	OCCC12NC(O)(CC3=CC=CC=C13)C1=CC=CC=C21	OCCC12NC(c3c2cccc3)(O)Cc2c1cccc2	74		MK-801	Thompson et al., 1990
ethyl 2-[(1S)-16-azatetracyclo[7.6.1.02,7.010,15]hexadeca-2,4,6,10,12,14-hexaen-1-yl]-2-hydroxyacetate			C19H19NO3	(S)			uncompetitive NMDAR antagonist	PCP-site (ion channel)	CCOC(=O)C(O)[C@]12NC(CC3=CC=CC=C13)C1=CC=CC=C21	CCOC(=O)C([C@]12NC(c3c2cccc3)Cc2c1cccc2)O	390		MK-801	Thompson et al., 1990
1-[(phenylsulfanyl)methyl]-16-azatetracyclo[7.6.1.02,7.010,15]hexadeca-2,4,6,10,12,14-hexaene			C22H19NS				uncompetitive NMDAR antagonist	PCP-site (ion channel)	C(SC1=CC=CC=C1)C12NC(CC3=CC=CC=C13)C1=CC=CC=C21	c1ccc(cc1)SCC12NC(c3c2cccc3)Cc2c1cccc2	73000		MK-801	Thompson et al., 1990
2-{9-chloro-16-azatetracyclo[7.6.1.02,7.010,15]hexadeca-2,4,6,10,12,14-hexaen-1-yl}acetamide			C17H15ClN2O				uncompetitive NMDAR antagonist	PCP-site (ion channel)	NC(=O)CC12NC(Cl)(CC3=CC=CC=C13)C1=CC=CC=C21	NC(=O)CC12NC(c3c2cccc3)(Cl)Cc2c1cccc2	> 90,000		MK-801	Thompson et al., 1990
2-{9-chloro-16-azatetracyclo[7.6.1.02,7.010,15]hexadeca-2,4,6,10,12,14-hexaen-1-yl}ethan-1-ol			C17H16ClNO				uncompetitive NMDAR antagonist	PCP-site (ion channel)	OCCC12NC(Cl)(CC3=CC=CC=C13)C1=CC=CC=C21	OCCC12NC(c3c2cccc3)(Cl)Cc2c1cccc2	280		MK-801	Thompson et al., 1990
9-chloro-1-(2-chloroethyl)-16-azatetracyclo[7.6.1.02,7.010,15]hexadeca-2,4,6,10,12,14-hexaene			C17H15Cl2N				uncompetitive NMDAR antagonist	PCP-site (ion channel)	ClCCC12NC(Cl)(CC3=CC=CC=C13)C1=CC=CC=C21	ClCCC12NC(c3c2cccc3)(Cl)Cc2c1cccc2	53000		MK-801	Thompson et al., 1990
1-(1,3-dithian-2-yl)-16-azatetracyclo[7.6.1.02,7.010,15]hexadeca-2,4,6,10,12,14-hexaene			C19H19NS2				uncompetitive NMDAR antagonist	PCP-site (ion channel)	C1CSC(SC1)C12NC(CC3=CC=CC=C13)C1=CC=CC=C21	C1CSC(SC1)C12NC(c3c2cccc3)Cc2c1cccc2	> 10000		MK-801	Thompson et al., 1990
1,17-dimethyl-17-azatetracyclo[8.6.1.02,7.011,16]heptadeca-2(7),3,5,11(16),12,14-hexaene			C18H19N				uncompetitive NMDAR antagonist	PCP-site (ion channel)	CN1C2CCC3=C(C=CC=C3)C1(C)C1=C2C=CC=C1	CN1C2CCc3c(C1(C)c1c2cccc1)cccc3	8800		MK-801	Thompson et al., 1990
17-methyl-17-azatetracyclo[8.6.1.02,7.011,16]heptadeca-2(7),3,5,11(16),12,14-hexaene			C17H17N				uncompetitive NMDAR antagonist	PCP-site (ion channel)	CN1C2CCC3=C(C=CC=C3)C1C1=C2C=CC=C1	CN1C2c3ccccc3CCC1c1c2cccc1	2600		MK-801	Thompson et al., 1990
1,9,17-trimethyl-17-azatetracyclo[7.7.1.02,7.011,16]heptadeca-2(7),3,5,11(16),12,14-hexaene			C19H21N				uncompetitive NMDAR antagonist	PCP-site (ion channel)	CN1C2(C)CC3=C(C=CC=C3)C1(C)C1=C(C2)C=CC=C1	CN1C2(C)Cc3c(C1(C)c1c(C2)cccc1)cccc3	8700		MK-801	Thompson et al., 1990
1,17-dimethyl-17-azatetracyclo[7.7.1.02,7.011,16]heptadeca-2(7),3,5,11(16),12,14-hexaene			C18H19N				uncompetitive NMDAR antagonist	PCP-site (ion channel)	CN1C2CC3=C(C=CC=C3)C1(C)C1=C(C2)C=CC=C1	CN1C2Cc3c(C1(C)c1c(C2)cccc1)cccc3	1200		MK-801	Thompson et al., 1990
1-methyl-17-azatetracyclo[7.7.1.02,7.011,16]heptadeca-2(7),3,5,11(16),12,14-hexaene			C17H17N				uncompetitive NMDAR antagonist	PCP-site (ion channel)	CC12NC(CC3=C1C=CC=C3)CC1=C2C=CC=C1	CC12NC(Cc3c2cccc3)Cc2c1cccc2	139		MK-801	Thompson et al., 1990
17-azatetracyclo[7.7.1.02,7.011,16]heptadeca-2(7),3,5,11(16),12,14-hexaene			C16H15N				uncompetitive NMDAR antagonist	PCP-site (ion channel)	C1C2CC3=C(C=CC=C3)C(N2)C2=C1C=CC=C2	c1ccc2c(c1)C1NC(C2)Cc2c1cccc2	5100		MK-801	Thompson et al., 1990
17-azatetracyclo[7.7.1.02,7.011,16]heptadeca-2(7),3,5,11(16),12,14-hexaen-1-ol			C16H15NO				uncompetitive NMDAR antagonist	PCP-site (ion channel)	OC12NC(CC3=C1C=CC=C3)CC1=C2C=CC=C1	OC12NC(Cc3c2cccc3)Cc2c1cccc2	57000		MK-801	Thompson et al., 1990
17-methyl-17-azatetracyclo[7.7.1.02,7.011,16]heptadeca-2(7),3,5,11(16),12,14-hexaene			C17H17N				uncompetitive NMDAR antagonist	PCP-site (ion channel)	CN1C2CC3=C(C=CC=C3)C1C1=C(C2)C=CC=C1	CN1C2Cc3c(C1c1c(C2)cccc1)cccc3	57000		MK-801	Thompson et al., 1990
4-chloro-1-methyl-17-azatetracyclo[7.7.1.02,7.011,16]heptadeca-2(7),3,5,11(16),12,14-hexaene			C17H16ClN				uncompetitive NMDAR antagonist	PCP-site (ion channel)	CC12NC(CC3=C1C=CC=C3)CC1=C2C=C(Cl)C=C1	Clc1ccc2c(c1)C1(C)NC(C2)Cc2c1cccc2	110		MK-801	Thompson et al., 1990
1-ethyl-17-azatetracyclo[7.7.1.02,7.011,16]heptadeca-2(7),3,5,11(16),12,14-hexaene			C18H19N				uncompetitive NMDAR antagonist	PCP-site (ion channel)	CCC12NC(CC3=C1C=CC=C3)CC1=C2C=CC=C1	CCC12NC(Cc3c2cccc3)Cc2c1cccc2	120		MK-801	Thompson et al., 1990
1-ethyl-17-methyl-17-azatetracyclo[7.7.1.02,7.011,16]heptadeca-2(7),3,5,11(16),12,14-hexaene			C19H21N				uncompetitive NMDAR antagonist	PCP-site (ion channel)	CCC12N(C)C(CC3=C1C=CC=C3)CC1=C2C=CC=C1	CCC12N(C)C(Cc3c2cccc3)Cc2c1cccc2	2040		MK-801	Thompson et al., 1990
4-azido-1-methyl-16-azatetracyclo[7.6.1.02,7.010,15]hexadeca-2,4,6,10,12,14-hexaene			C16H14N2[N-][N+]				uncompetitive NMDAR antagonist	PCP-site (ion channel)	CC12NC(CC3=CC=C(C=C13)N=[N+]=[N-])C1=CC=CC=C21	[N-]=[N+]=Nc1ccc2c(c1)C1(C)NC(C2)c2c1cccc2	140		MK-801	Thompson et al., 1990
1-methyl-4-[(trifluoromethyl)sulfanyl]-16-azatetracyclo[7.6.1.02,7.010,15]hexadeca-2,4,6,10,12,14-hexaene			C17H14F3NS				uncompetitive NMDAR antagonist	PCP-site (ion channel)	CC12NC(CC3=CC=C(SC(F)(F)F)C=C13)C1=CC=CC=C21	FC(Sc1ccc2c(c1)C1(C)NC(C2)c2c1cccc2)(F)F	17000		MK-801	Thompson et al., 1990
4-fluoro-1-methyl-16-azatetracyclo[7.6.1.02,7.010,15]hexadeca-2,4,6,10,12,14-hexaene			C16H14FN				uncompetitive NMDAR antagonist	PCP-site (ion channel)	CC12NC(CC3=CC=C(F)C=C13)C1=CC=CC=C21	Fc1ccc2c(c1)C1(C)NC(C2)c2c1cccc2	30		MK-801	Thompson et al., 1990
(8R)-1-methyl-16-azatetracyclo[7.6.1.02,7.010,15]hexadeca-2,4,6,10,12,14-hexaen-8-ol			C16H15NO				uncompetitive NMDAR antagonist	PCP-site (ion channel)	CC12NC([C@H](O)C3=CC=CC=C13)C1=CC=CC=C21	O[C@H]1C2NC(c3c1cccc3)(c1c2cccc1)C	2700		MK-801	Thompson et al., 1990
(8S)-1-methyl-16-azatetracyclo[7.6.1.02,7.010,15]hexadeca-2,4,6,10,12,14-hexaen-8-ol			C16H15NO				uncompetitive NMDAR antagonist	PCP-site (ion channel)	[H][C@@]1(O)C2NC(C)(C3=CC=CC=C23)C2=CC=CC=C12	O[C@@H]1C2NC(c3c1cccc3)(c1c2cccc1)C	210		MK-801	Thompson et al., 1990
(8S)-8-fluoro-1-methyl-16-azatetracyclo[7.6.1.02,7.010,15]hexadeca-2,4,6,10,12,14-hexaene			C16H14FN				uncompetitive NMDAR antagonist	PCP-site (ion channel)	[H][C@@]1(F)C2NC(C)(C3=CC=CC=C23)C2=CC=CC=C12	F[C@@H]1C2NC(c3c1cccc3)(c1c2cccc1)C	11		MK-801	Thompson et al., 1990
(8S)-16-azatetracyclo[7.6.1.02,7.010,15]hexadeca-2,4,6,10,12,14-hexaen-8-ol			C15H13NO				uncompetitive NMDAR antagonist	PCP-site (ion channel)	[H][C@@]1(O)C2NC(C3=CC=CC=C23)C2=CC=CC=C12	O[C@H]1c2ccccc2C2NC1c1ccccc21	7750		MK-801	Thompson et al., 1990

## Sheet: Validation Sets
id	Name	Abbreviation	Common Name	Molecular Formula	Stereochemistry/Conformation Info	Chemical Class	Type	Location	Canonical SMILES	Can-SMILES for Major Tautomer at pH 7.0	Ki (nM)	IC50 (nM)	Reference Ligand	References/Citations
m0003	1-(1-Phenylcyclohexyl)piperidine	PCP	phencyclidine	C17H25N		arylcyclohexylamine	uncompetitive NMDAR antagonist	PCP-site (ion channel)	C1CCC(CC1)(N1CCCCC1)c1ccccc1	C1CCC(CC1)(c1ccccc1)[NH+]1CCCCC1	57.9	91	MK-801	Wallach, 2014
m0005	1-[1-(4-Methoxyphenyl)cyclohexyl]piperidine	4-MeO-PCP	methoxydine	C18H27NO		anisylcyclohexylamine	uncompetitive NMDAR antagonist	PCP-site (ion channel)	COc1ccc(cc1)C1(CCCCC1)N1CCCCC1	COc1ccc(cc1)C1(CCCCC1)[NH+]1CCCCC1	620	972.8	MK-801	Wallach, 2014
m0008	1-[1-(3-Methoxyphenyl)cyclohexyl]pyrrolidine	3-MeO-PCPy		C17H25NO		anisylcyclohexylamine	uncompetitive NMDAR antagonist	PCP-site (ion channel)	COc1cccc(c1)C1(CCCCC1)N1CCCC1	COc1cccc(c1)C1(CCCCC1)[NH+]1CCCC1	22.3	35	MK-801	Wallach, 2014
m0009	1-(3-Methoxyphenyl)-N-propylcyclohexan-1-amine	3-MeO-PCPr		C16H23NO		anisylcyclohexylamine	uncompetitive NMDAR antagonist	PCP-site (ion channel)	CCCNC1(CCCCC1)c1cccc(c1)OC	CCC[NH2+]C1(CCCCC1)c1cccc(c1)OC	17.9	28.2	MK-801	Wallach, 2014
m0010	1-[1-(3-Methoxyphenyl)cyclohexyl]piperidine	3-MeO-PCP		C18H27NO		anisylcyclohexylamine	uncompetitive NMDAR antagonist	PCP-site (ion channel)	COc1cccc(c1)C1(CCCCC1)N1CCCCC1	COc1cccc(c1)C1(CCCCC1)[NH+]1CCCCC1	38.1	59.8	MK-801	Wallach, 2014
m0012	1-(3-Methoxyphenyl)-N-methylcyclohexan-1-amine	3-MeO-PCMe		C14H21NO			uncompetitive NMDAR antagonist	PCP-site (ion channel)	CNC1(CCCCC1)c1cccc(c1)OC	C[NH2+]C1(CCCCC1)c1cccc(c1)OC	145.1	227.9	MK-801	Wallach, 2014
m0013	N-Ethyl-1-(3-methoxyphenyl)cyclohexan-1-amine	3-MeO-PCE	methoxieticyclidine	C15H23NO		anisylcyclohexylamine	uncompetitive NMDAR antagonist	PCP-site (ion channel)	CCNC1(CCCCC1)c1cccc(c1)OC	COc1cccc(c1)C1(CCCCC1)[NH2+]CC	30.4	47.8	MK-801	Wallach, 2014
m0016	1-(1,3-Benzodioxol-5-yl)-N-propylcyclohexanamine	3,4-MD-PCPr		C16H23NO2			uncompetitive NMDAR antagonist	PCP-site (ion channel)	CCCNC1(CCCCC1)c1ccc2c(c1)OCO2	CCC[NH2+]C1(CCCCC1)c1ccc2c(c1)OCO2	24.9	39	MK-801	Wallach, 2014
m0018	1-(1,3-Benzodioxol-5-yl)-N-ethylcyclohexanamine	3,4-MD-PCE		C15H21NO2			uncompetitive NMDAR antagonist	PCP-site (ion channel)	CCNC1(CCCCC1)c1ccc2c(c1)OCO2	CC[NH2+]C1(CCCCC1)c1ccc2c(c1)OCO2	35.5	55.7	MK-801	Wallach, 2014
m0020	(5S,10R)-5-methyl-10,11-dihydro-5H-5,10-epiminodibenzo[a,d][7]annulene	MK-801	dizocilpine	C16H15N	(+)	dibenzocycloalkenamine	uncompetitive NMDAR antagonist	PCP-site (ion channel)	C[C@]12N[C@@H](c3c2cccc3)Cc2c1cccc2	C[C@]12[NH2+][C@@H](c3c2cccc3)Cc2c1cccc2	10	15.2	MK-801	Wallach, 2014
m0272	1‐[1‐(3,4‐dimethoxyphenyl)cyclohexyl]piperidine	3,4-DiMeO-PCP		C19H29NO2		arylcyclohexylamine	uncompetitive NMDAR antagonist	PCP-site (ion channel)	COc1cc(ccc1OC)C1(CCCCC1)N1CCCCC1	COc1cc(ccc1OC)C1(CCCCC1)[NH+]1CCCCC1	1727	2712	MK-801	Wallach, 2014
m0355	N-ethyl-1-(3-methylphenyl)cyclohexan-1-amine	3-Me-PCE		C15H23N		arylcyclohexylamine	uncompetitive NMDAR antagonist	PCP-site (ion channel)	CCNC1(CCCCC1)c1cccc(c1)C	CC[NH2+]C1(CCCCC1)c1cccc(c1)C	43.1	67.6	MK-801	Wallach, 2014
m0356	N-methyl-1-(3-methylphenyl)cyclohexan-1-amine	3-Me-PCMe		C14H21N		arylcyclohexylamine	uncompetitive NMDAR antagonist	PCP-site (ion channel)	CNC1(CCCCC1)c1cccc(c1)C	C[NH2+]C1(CCCCC1)c1cccc(c1)C	134.8	211.6	MK-801	Wallach, 2014
m0357	1-(3-methylphenyl)-N-propylcyclohexan-1-amine	3-Me-PCPr		C16H25N		arylcyclohexylamine	uncompetitive NMDAR antagonist	PCP-site (ion channel)	CCCNC1(CCCCC1)c1cccc(c1)C	CCC[NH2+]C1(CCCCC1)c1cccc(c1)C	53.5	84	MK-801	Wallach, 2014
m0096	1-Phenylcyclohexan-1-amine	PCA		C12H17N		arylcyclohexylamine	uncompetitive NMDAR antagonist	PCP-site (ion channel)	NC1(CCCCC1)c1ccccc1	[NH3+]C1(CCCCC1)c1ccccc1	599.2	940.7	MK-801	Wallach, 2014
m0493	1-[1-(2-Methoxyphenyl)cyclohexyl]piperidine	2-MeO-PCP		C18H27NO		arylcyclohexylamine	uncompetitive NMDAR antagonist	PCP-site (ion channel)	COc1ccccc1C1(CCCCC1)N1CCCCC1	COc1ccccc1C1(CCCCC1)[NH+]1CCCCC1	147.5	231.6	MK-801	Wallach, 2014
m0494	1-[1-(3-methylphenyl)cyclohexyl]piperidine	3-Me-PCP		C18H27N		arylcyclohexylamine	uncompetitive NMDAR antagonist	PCP-site (ion channel)	Cc1cccc(c1)C1(CCCCC1)N1CCCCC1	Cc1cccc(c1)C1(CCCCC1)[NH+]1CCCCC1	345	54.6	MK-801	Wallach, 2014
m0495	1‐[1‐(2H‐1,3‐benzodioxol‐5‐yl)cyclohexyl]piperidine	3,4-MD-PCP		C18H25NO2		arylcyclohexylamine, dioxolane	uncompetitive NMDAR antagonist	PCP-site (ion channel)	C1CCC(CC1)(N1CCCCC1)c1ccc2c(c1)OCO2	C1CCC(CC1)(c1ccc2c(c1)OCO2)[NH+]1CCCCC1	62.8	98.6	MK-801	Wallach, 2014
m0496	1-[1-(3,4-dihydro-1,4-benzodioxin-6-yl)cyclohexyl]piperidine	3,4-ED-PCP		C19H27NO2		arylcyclohexylamine, dioxane	uncompetitive NMDAR antagonist	PCP-site (ion channel)	C1CCC(CC1)(N1CCCCC1)c1ccc2c(c1)OCCO2	C1CCC(CC1)(c1ccc2c(c1)OCCO2)[NH+]1CCCCC1	60.1	94.4	MK-801	Wallach, 2014
m0497	1-1-[3-(propan-2-yloxy)phenyl]cyclohexylpiperidine	3-IpO-PCP		C20H31NO		arylcyclohexylamine	uncompetitive NMDAR antagonist	PCP-site (ion channel)	CC(Oc1cccc(c1)C1(CCCCC1)N1CCCCC1)C	CC(Oc1cccc(c1)C1(CCCCC1)[NH+]1CCCCC1)C	56.1	88.1	MK-801	Wallach, 2014
m0498	1-[1-(3-ethoxyphenyl)cyclohexyl]piperidine	3-EtO-PCP		C19H29NO		arylcyclohexylamine	uncompetitive NMDAR antagonist	PCP-site (ion channel)	CCOc1cccc(c1)C1(CCCCC1)N1CCCCC1	CCOc1cccc(c1)C1(CCCCC1)[NH+]1CCCCC1	111.8	175.5	MK-801	Wallach, 2014
m0499	1-[1-(2,3-dihydro-1-benzofuran-6-yl)cyclohexyl]piperidine	4-DHBF-PCP		C19H27NO		arylcyclohexylamine, benzofuran	uncompetitive NMDAR antagonist	PCP-site (ion channel)	C1CCC(CC1)(N1CCCCC1)c1ccc2c(c1)OCC2	C1CCC(CC1)(c1ccc2c(c1)OCC2)[NH+]1CCCCC1	75.4	118.3	MK-801	Wallach, 2014
m0500	1-[1-(4-methoxy-3-methylphenyl)cyclohexyl]piperidine	3-Me-4-MeO-PCP		C19H29NO		arylcyclohexylamine	uncompetitive NMDAR antagonist	PCP-site (ion channel)	COc1ccc(cc1C)C1(CCCCC1)N1CCCCC1	COc1ccc(cc1C)C1(CCCCC1)[NH+]1CCCCC1	185.3	290.9	MK-801	Wallach, 2014
m0501	1-[1-(3-methoxy-4-methylphenyl)cyclohexyl]piperidine	3-MeO-4-Me-PCP		C19H29NO		arylcyclohexylamine	uncompetitive NMDAR antagonist	PCP-site (ion channel)	COc1cc(ccc1C)C1(CCCCC1)N1CCCCC1	COc1cc(ccc1C)C1(CCCCC1)[NH+]1CCCCC1	282.8	444	MK-801	Wallach, 2014
m0502	1-[1-(4-fluoro-3-methylphenyl)cyclohexyl]piperidine	3-Me-4-F-PCP		C18H26FN		arylcyclohexylamine	uncompetitive NMDAR antagonist	PCP-site (ion channel)	Fc1ccc(cc1C)C1(CCCCC1)N1CCCCC1	Fc1ccc(cc1C)C1(CCCCC1)[NH+]1CCCCC1	44.2	69.3	MK-801	Wallach, 2014
m0503	1-1-[3-(trifluoromethoxy)phenyl]cyclohexylpiperidine	3-CF3O-PCP		C18H24F3NO		arylcyclohexylamine	uncompetitive NMDAR antagonist	PCP-site (ion channel)	FC(Oc1cccc(c1)C1(CCCCC1)N1CCCCC1)(F)F	FC(Oc1cccc(c1)C1(CCCCC1)[NH+]1CCCCC1)(F)F	1960	3080	MK-801	Wallach, 2014
m0504	1‐[1‐(3,5‐dimethoxyphenyl)cyclohexyl]piperidine	3,5-DiMeO-PCP		C19H29NO2		arylcyclohexylamine	uncompetitive NMDAR antagonist	PCP-site (ion channel)	COc1cc(OC)cc(c1)C1(CCCCC1)N1CCCCC1	COc1cc(OC)cc(c1)C1(CCCCC1)[NH+]1CCCCC1	1191	1870	MK-801	Wallach, 2014
m0505	1‐[1‐(2,5‐dimethoxyphenyl)cyclohexyl]piperidine	2,5-DiMeO-PCP		C19H29NO2		arylcyclohexylamine	uncompetitive NMDAR antagonist	PCP-site (ion channel)	COc1ccc(cc1C1(CCCCC1)N1CCCCC1)OC	COc1ccc(cc1C1(CCCCC1)[NH+]1CCCCC1)OC	856	1359	MK-801	Wallach, 2014
m0506	1-[1-(3-fluorophenyl)cyclohexyl]piperidine	3-F-PCP		C17H24FN		arylcyclohexylamine	uncompetitive NMDAR antagonist	PCP-site (ion channel)	Fc1cccc(c1)C1(CCCCC1)N1CCCCC1	Fc1cccc(c1)C1(CCCCC1)[NH+]1CCCCC1	1150	2276	MK-801	Wallach, 2014
m0507	1-[1-(2-Methoxyphenyl)cyclohexyl]pyrrolidine	2-MeO-PCPy		C17H25NO		anisylcyclohexylamine	uncompetitive NMDAR antagonist	PCP-site (ion channel)	COc1ccccc1C1(CCCCC1)N1CCCC1	COc1ccccc1C1(CCCCC1)[NH+]1CCCC1	338.5	531.4	MK-801	Wallach, 2014
m0508	1-[1-(4-Methoxyphenyl)cyclohexyl]pyrrolidine	4-MeO-PCPy		C17H25NO		anisylcyclohexylamine	uncompetitive NMDAR antagonist	PCP-site (ion channel)	COc1ccc(cc1)C1(CCCCC1)N1CCCC1	COc1ccc(cc1)C1(CCCCC1)[NH+]1CCCC1	215.7	338.6	MK-801	Wallach, 2014
m0509	1-[1-(3-methylphenyl)cyclohexyl] pyrrolidine	3-Me-PCPy		C17H25N		arylcyclohexylamine	uncompetitive NMDAR antagonist	PCP-site (ion channel)	Cc1cccc(c1)C1(CCCCC1)N1CCCC1	Cc1cccc(c1)C1(CCCCC1)[NH+]1CCCC1	52	82.2	MK-801	Wallach, 2014
m0510	1-[1-(2H-1,3-benzodioxol-5-yl)cyclohexyl] pyrrolidine	3,4-MD-PCPy		C17H23NO2		arylcyclohexylamine, dioxolane	uncompetitive NMDAR antagonist	PCP-site (ion channel)	C1CCC(CC1)(N1CCCC1)c1ccc2c(c1)OCO2	C1CCC(CC1)(c1ccc2c(c1)OCO2)[NH+]1CCCC1	47	74	MK-801	Wallach, 2014
m0518	1‐[1‐(thiophen‐2‐yl)bicyclo[2.2.1]heptan‐2‐yl]piperidine	TBCHP		C16H23NS	Exo/Endo mix	arylcycloheptylamine	uncompetitive NMDAR antagonist	PCP-site (ion channel)	C1CCN(CC1)C1CC2CC1(CC2)c1cccs1	C1CC[NH+](CC1)C1CC2CC1(CC2)c1cccs1	196.8	309	MK-801	Wallach, 2014
m0522	1‐[2‐(4‐methoxyphenyl)bicyclo[2.2.1]heptan‐2‐yl]piperidine	4-MeO-PBCHP		C19H27NO	Exo/Endo mix	arylcycloheptylamine	uncompetitive NMDAR antagonist	PCP-site (ion channel)	COc1ccc(cc1)C1(CC2CC1CC2)N1CCCCC1	COc1ccc(cc1)C1(CC2CC1CC2)[NH+]1CCCCC1	3558	5586	MK-801	Wallach, 2014
m0524	1‐[2‐(2H‐1,3‐benzodioxol‐5‐yl)bicyclo[2.2.1]heptan‐2‐yl]piperidine	3,4-MD-PBCHP		C19H25NO2	Exo/Endo mix	arylcycloheptylamine	uncompetitive NMDAR antagonist	PCP-site (ion channel)	C1CCN(CC1)C1(CC2CC1CC2)c1ccc2c(c1)OCO2	C1CC[NH+](CC1)C1(CC2CC1CC2)c1ccc2c(c1)OCO2	3105	4875	MK-801	Wallach, 2014
m0527	1‐[2‐(4‐methoxyphenyl)bicyclo[2.2.1]heptan‐2‐yl]pyrrolidine	4-MeO-PBCHPy		C18H25NO	Exo/Endo mix	arylcycloheptylamine	uncompetitive NMDAR antagonist	PCP-site (ion channel)	COc1ccc(cc1)C1(CC2CC1CC2)N1CCCC1	COc1ccc(cc1)C1(CC2CC1CC2)[NH+]1CCCC1	3763	5909	MK-801	Wallach, 2014
m0529	1-[2-(2H-1,3-benzodioxol-5-yl)bicyclo[2.2.1]heptan-2-yl] pyrrolidine	3,4-MD-PBCHPy		C18H23NO2	Exo/Endo mix	arylcycloheptylamine	uncompetitive NMDAR antagonist	PCP-site (ion channel)	C1CCN(C1)C1(CC2CC1CC2)c1ccc2c(c1)OCO2	C1Oc2c(O1)cc(cc2)C1(CC2CC1CC2)[NH+]1CCCC1	2086	3273	MK-801	Wallach, 2014
m0538	2‐phenylbicyclo[2.2.1]heptan‐2‐amine	PBCHA		C13H17N		arylcycloheptylamine	uncompetitive NMDAR antagonist	PCP-site (ion channel)	NC1(CC2CC1CC2)c1ccccc1	[NH3+]C1(CC2CC1CC2)c1ccccc1	9710	14397	MK-801	Wallach, 2014
m0003	1-(1-Phenylcyclohexyl)piperidine	PCP	phencyclidine	C17H25N		arylcyclohexylamine	uncompetitive NMDAR antagonist	PCP-site (ion channel)	C1CCC(CC1)(N1CCCCC1)c1ccccc1	C1CCC(CC1)(c1ccccc1)[NH+]1CCCCC1	70		TCP	Thurkauf et al., 1990
m0095	1-phenylcyclohexan-1-amine	PCA		C12H17N		arylcyclohexylamine	uncompetitive NMDAR antagonist	PCP-site (ion channel)	NC1(CCCCC1)c1ccccc1	[NH3+]C1(CCCCC1)c1ccccc1	527		TCP	Thurkauf et al., 1990
m0096	N-methyl-1-phenylcyclohexan-1-amine			C13H19N		arylcyclohexylamine	uncompetitive NMDAR antagonist	PCP-site (ion channel)	CNC1(CCCCC1)c1ccccc1	C[NH2+]C1(CCCCC1)c1ccccc1	347		TCP	Thurkauf et al., 1990
m0097	N,N-dimethyl-1-phenylcyclohexan-1-amine	PCDEA		C14H21N		arylcyclohexylamine	uncompetitive NMDAR antagonist	PCP-site (ion channel)	CN(C1(CCCCC1)c1ccccc1)C	C[NH+](C1(CCCCC1)c1ccccc1)C	722		TCP	Thurkauf et al., 1990
m0098	(1R,2S)-2-methyl-1-phenylcyclohexan-1-amine			C13H19N	(+/-)	arylcyclohexylamine	uncompetitive NMDAR antagonist	PCP-site (ion channel)	C[C@H]1CCCC[C@]1(N)c1ccccc1	C[C@H]1CCCC[C@]1([NH3+])c1ccccc1	2000		TCP	Thurkauf et al., 1990
m0099	(1R,2R)-2-methyl-1-phenylcyclohexan-1-amine			C13H19N	(+/-)	arylcyclohexylamine	uncompetitive NMDAR antagonist	PCP-site (ion channel)	C[C@@H]1CCCC[C@]1(N)c1ccccc1	C[C@@H]1CCCC[C@]1([NH3+])c1ccccc1	1600		TCP	Thurkauf et al., 1990
m0100	(1R,3S)-3-methyl-1-phenylcyclohexan-1-amine			C13H19N		arylcyclohexylamine	uncompetitive NMDAR antagonist	PCP-site (ion channel)	C[C@H]1CCC[C@](C1)(N)c1ccccc1	C[C@H]1CCC[C@](C1)([NH3+])c1ccccc1	502		TCP	Thurkauf et al., 1990
m0101	(1S,3R)‐3‐methyl‐1‐phenylcyclohexan‐1‐amine			C13H19N		arylcyclohexylamine	uncompetitive NMDAR antagonist	PCP-site (ion channel)	C[C@@H]1CCC[C@@](C1)(N)c1ccccc1	C[C@@H]1CCC[C@@](C1)([NH3+])c1ccccc1	8000		TCP	Thurkauf et al., 1990
m0102	(1R,3R)‐3‐methyl‐1‐phenylcyclohexan‐1‐amine			C13H19N		arylcyclohexylamine	uncompetitive NMDAR antagonist	PCP-site (ion channel)	C[C@@H]1CCC[C@](C1)(N)c1ccccc1	C[C@@H]1CCC[C@](C1)([NH3+])c1ccccc1	1200		TCP	Thurkauf et al., 1990
m0103	(1S,3S)‐3‐methyl‐1‐phenylcyclohexan‐1‐amine			C13H19N		arylcyclohexylamine	uncompetitive NMDAR antagonist	PCP-site (ion channel)	C[C@H]1CCC[C@@](C1)(N)c1ccccc1	C[C@H]1CCC[C@@](C1)([NH3+])c1ccccc1	1640		TCP	Thurkauf et al., 1990
m0104	(1s,4s)‐4‐methyl‐1‐phenylcyclohexan‐1‐amine			C13H19N		arylcyclohexylamine	uncompetitive NMDAR antagonist	PCP-site (ion channel)	C[C@@H]1CC[C@@](CC1)(N)c1ccccc1	C[C@@H]1CC[C@@](CC1)([NH3+])c1ccccc1	1100		TCP	Thurkauf et al., 1990
m0105	(1r,4r)‐4‐methyl‐1‐phenylcyclohexan‐1‐amine			C13H19N		arylcyclohexylamine	uncompetitive NMDAR antagonist	PCP-site (ion channel)	C[C@@H]1CC[C@](CC1)(N)c1ccccc1	C[C@@H]1CC[C@](CC1)([NH3+])c1ccccc1	8400		TCP	Thurkauf et al., 1990
m0106	1-(2-methyl-1-phenyl)cyclohexan-1-amine			C13H19N		arylcyclohexylamine	uncompetitive NMDAR antagonist	PCP-site (ion channel)	Cc1ccccc1C1(N)CCCCC1	Cc1ccccc1C1([NH3+])CCCCC1	7800		TCP	Thurkauf et al., 1990
m0107	1-(3-methylphenyl)cyclohexan-1-amine			C13H19N		arylcyclohexylamine	uncompetitive NMDAR antagonist	PCP-site (ion channel)	Cc1cccc(c1)C1(N)CCCCC1	Cc1cccc(c1)C1([NH3+])CCCCC1	592		TCP	Thurkauf et al., 1990
m0108	1-(4-methylphenyl)cyclohexan-1-amine			C13H19N		arylcyclohexylamine	uncompetitive NMDAR antagonist	PCP-site (ion channel)	NC1(CCCCC1)c1ccc(cc1)C	[NH3+]C1(CCCCC1)c1ccc(cc1)C	7300		TCP	Thurkauf et al., 1990
m0109	1-(1-phenylcyclohexyl)methanamine			C13H19N		arylcyclohexylamine	uncompetitive NMDAR antagonist	PCP-site (ion channel)	NCC1(CCCCC1)c1ccccc1	[NH3+]CC1(CCCCC1)c1ccccc1	5100		TCP	Thurkauf et al., 1990
m0110	1-benzylcyclohexan-1-amine			C13H19N		arylcyclohexylamine	uncompetitive NMDAR antagonist	PCP-site (ion channel)	NC1(CCCCC1)Cc1ccccc1	[NH3+]C1(CCCCC1)Cc1ccccc1	16000		TCP	Thurkauf et al., 1990
m0111	1‐(2‐methoxyphenyl)cyclohexan‐1‐amine			C13H19NO		arylcyclohexylamine	uncompetitive NMDAR antagonist	PCP-site (ion channel)	COc1ccccc1C1(N)CCCCC1	COc1ccccc1C1([NH3+])CCCCC1	850		TCP	Thurkauf et al., 1990
m0112	1‐(3‐methoxyphenyl)cyclohexan‐1‐amine			C13H19NO		arylcyclohexylamine	uncompetitive NMDAR antagonist	PCP-site (ion channel)	COc1cccc(c1)C1(N)CCCCC1	COc1cccc(c1)C1([NH3+])CCCCC1	563		TCP	Thurkauf et al., 1990
m0113	1‐[2‐(methylsulfanyl)phenyl]cyclohexan‐1‐amine			C13H19NS		arylcyclohexylamine	uncompetitive NMDAR antagonist	PCP-site (ion channel)	CSc1ccccc1C1(N)CCCCC1	CSc1ccccc1C1([NH3+])CCCCC1	820		TCP	Thurkauf et al., 1990
m0114	1‐[3‐(methylsulfanyl)phenyl]cyclohexan‐1‐amine			C13H19NS		arylcyclohexylamine	uncompetitive NMDAR antagonist	PCP-site (ion channel)	CSc1cccc(c1)C1(N)CCCCC1	CSc1cccc(c1)C1([NH3+])CCCCC1	2420		TCP	Thurkauf et al., 1990
m0115	1‐(2‐fluorophenyl)cyclohexan‐1‐amine			C12H16FN		arylcyclohexylamine	uncompetitive NMDAR antagonist	PCP-site (ion channel)	Fc1ccccc1C1(N)CCCCC1	Fc1ccccc1C1([NH3+])CCCCC1	10700		TCP	Thurkauf et al., 1990
m0116	1‐(3‐fluorophenyl)cyclohexan‐1‐amine			C12H16FN		arylcyclohexylamine	uncompetitive NMDAR antagonist	PCP-site (ion channel)	Fc1cccc(c1)C1(N)CCCCC1	Fc1cccc(c1)C1([NH3+])CCCCC1	675		TCP	Thurkauf et al., 1990
m0117	1‐(4‐fluorophenyl)cyclohexan‐1‐amine			C12H16FN		arylcyclohexylamine	uncompetitive NMDAR antagonist	PCP-site (ion channel)	NC1(CCCCC1)c1ccc(cc1)F	[NH3+]C1(CCCCC1)c1ccc(cc1)F	923		TCP	Thurkauf et al., 1990
m0118	1‐[2‐(trifluoromethyl)phenyl]cyclohexan‐1‐amine			C13H16F3N		arylcyclohexylamine	uncompetitive NMDAR antagonist	PCP-site (ion channel)	NC1(CCCCC1)c1ccccc1C(F)(F)F	FC(c1ccccc1C1([NH3+])CCCCC1)(F)F	12400		TCP	Thurkauf et al., 1990
m0119	1‐[3‐(trifluoromethyl)phenyl]cyclohexan‐1‐amine			C13H16F3N		arylcyclohexylamine	uncompetitive NMDAR antagonist	PCP-site (ion channel)	NC1(CCCCC1)c1cccc(c1)C(F)(F)F	FC(c1cccc(c1)C1([NH3+])CCCCC1)(F)F	8400		TCP	Thurkauf et al., 1990
m0120	3-(1-aminocyclohexyl)phenol			C12H17NO		arylcyclohexylamine	uncompetitive NMDAR antagonist	PCP-site (ion channel)	Oc1cccc(c1)C1(N)CCCCC1	Oc1cccc(c1)C1([NH3+])CCCCC1	222		TCP	Thurkauf et al., 1990
m0121	1‐(phenanthren‐9‐yl)cyclohexan‐1‐amine			C20H21N		arylcyclohexylamine	uncompetitive NMDAR antagonist	PCP-site (ion channel)	NC1(CCCCC1)c1cc2ccccc2c2c1cccc2	[NH3+]C1(CCCCC1)c1cc2ccccc2c2c1cccc2	27500		TCP	Thurkauf et al., 1990
m0122	1‐(2,3,4,5,6‐pentafluorophenyl)cyclohexan‐1‐amine			C12H12F5N		arylcyclohexylamine	uncompetitive NMDAR antagonist	PCP-site (ion channel)	NC1(CCCCC1)c1c(F)c(F)c(c(c1F)F)F	[NH3+]C1(CCCCC1)c1c(F)c(F)c(c(c1F)F)F	10000		TCP	Thurkauf et al., 1990
m0123	1‐(thiophen‐2‐yl)cyclohexan‐1‐amine			C10H15NS			uncompetitive NMDAR antagonist	PCP-site (ion channel)	NC1(CCCCC1)c1cccs1	[NH3+]C1(CCCCC1)c1cccs1	145		TCP	Thurkauf et al., 1990
m0124	1-phenylcyclopentan-1-amine			C11H15N			uncompetitive NMDAR antagonist	PCP-site (ion channel)	NC1(CCCC1)c1ccccc1	[NH3+]C1(CCCC1)c1ccccc1	10500		TCP	Thurkauf et al., 1990
m0125	1‐[4‐(methylsulfanyl)phenyl]cyclohexan‐1‐amine			C13H19NS		arylcyclohexylamine	uncompetitive NMDAR antagonist	PCP-site (ion channel)	CSc1ccc(cc1)C1(N)CCCCC1	CSc1ccc(cc1)C1([NH3+])CCCCC1	43000		TCP	Thurkauf et al., 1990
m0126	1‐(naphthalen‐2‐yl)cyclohexan‐1‐amine			C16H19N		arylcyclohexylamine	uncompetitive NMDAR antagonist	PCP-site (ion channel)	NC1(CCCCC1)c1ccc2c(c1)cccc2	[NH3+]C1(CCCCC1)c1ccc2c(c1)cccc2	34000		TCP	Thurkauf et al., 1990
m0127	1‐{[1,1'‐biphenyl]‐4‐yl}cyclohexan‐1‐amine			C18H21N			uncompetitive NMDAR antagonist	PCP-site (ion channel)	NC1(CCCCC1)c1ccc(cc1)c1ccccc1	[NH3+]C1(CCCCC1)c1ccc(cc1)c1ccccc1	86000		TCP	Thurkauf et al., 1990
m0128	1-phenylcycloheptan-1-amine	PCHEA		C13H19N		arylcycloheptylamine	uncompetitive NMDAR antagonist	PCP-site (ion channel)	NC1(CCCCCC1)c1ccccc1	[NH3+]C1(CCCCCC1)c1ccccc1	2600		TCP	Thurkauf et al., 1990
m0661	N,N,N‐trimethyl‐1‐phenylcyclohexan‐1‐aminium			C15H24[N+]			uncompetitive NMDAR antagonist	PCP-site (ion channel)	C[N+](C1(CCCCC1)c1ccccc1)(C)C	C[N+](C1(CCCCC1)c1ccccc1)(C)C	14300		TCP	Thurkauf et al., 1990
m0680	1-(4-methoxyphenyl)cyclohexan-1-amine			C13H19NO		arylcyclohexylamine			COc1ccc(cc1)C1(N)CCCCC1	COc1ccc(cc1)C1([NH3+])CCCCC1	121000		TCP	Thurkauf et al., 1990

## Sheet: Validation Set 1 Decoys
Source Ligand	Canonical SMILES	Decoy ID
COc1cc(ccc1C)C1(CCCCC1)N1CCCCC1	Cc1ccc(cc1)Sc2c([nH+]c3n2cccc3)c4ccccc4	d0001
	c1ccc2c(c1)ccc3c2cc4ccccc4c3c5cc[nH+]cc5	d0002
	C[C@H](c1ccccc1)n2c3ccc(cc3[nH+]c2[C@H](C)Cl)Cl	d0003
	C[C@H](c1ccccc1)n2c3c(cccc3Cl)[nH+]c2[C@@H](C)Cl	d0004
	C[C@H](c1ccccc1)n2c3c(cccc3Cl)[nH+]c2[C@H](C)Cl	d0005
	CC[C@@H](C)n1c2ccc(cc2[nH+]c1[C@@H](C)Cl)Br	d0006
	CCc1ccc(cc1)n2c3ccc(cc3[nH+]c2[C@H](C)Cl)Cl	d0007
	C[C@H]1C[C@@H](C[NH+](C1)[C@@H](C)C(=O)c2ccc(cc2Cl)Cl)C	d0008
	CC(C)n1c2cccc(c2[nH+]c1c3ccc(cc3)CCl)F	d0009
	CCc1cccc2=C(C[NH+]=c12)/C=C/3\C(=O)c4ccccc4S3	d0010
	c1ccc2c(c1)[nH+]c(n2Cc3ccc(cc3Cl)Cl)C4CC4	d0011
	c1ccc2cc(ccc2c1)Cn3c4ccccc4[nH+]c3C5CC5	d0012
	CC(C)(C)c1[nH+]c2ccc(cc2n1Cc3ccccc3)Cl	d0013
	C[C@H](c1ccc(s1)Cl)n2c3ccccc3[nH+]c2CCl	d0014
	c1ccc(cc1)c2[nH+]ccn2Cc3cccc(c3)Br	d0015
	C[C@@H]1C[C@@H](C[NH+](C1)[C@@H](C)C(=O)c2ccc(cc2Cl)Cl)C	d0016
	Cc1ccc(cc1)[C@H](C)n2c3ccccc3[nH+]c2[C@H](C)Cl	d0017
	CCCC[C@H]1C[C@]2([C@@H]3C(=c4ccccc4=[NH+]3)CCN2C1)C	d0018
	C[C@H]1CC[C@@H]([C@@H](C1)C)n2c([nH+]c3c2c(c(cc3)F)F)CCl	d0019
	C[C@H]1CC[C@H]([C@@H](C1)C)n2c3cccc(c3[nH+]c2CCCl)F	d0020
	C[C@@H]1CC[C@H]([C@@H](C1)C)n2c3cc(ccc3[nH+]c2CCCl)F	d0021
	c1cc(cc(c1)Cl)/C=N\C=[NH+]\c2cccc(c2)Cl	d0022
	Cc1ccc(cc1)c2csc(n2)c3c([nH+]cc4c3CCCC4)C	d0023
	C[C@H](C[NH+](C)[C@@H](C)c1ccc(cc1)Cl)CBr	d0024
	CC(C)(C)C1CC[NH+](CC1)CC(C)(C)CBr	d0025
	CCC(CC)(C[NH+]1C[C@@H](C[C@H](C1)C)C)CBr	d0026
	CC(C)[C@@H](C[NH+](C)C1CCCCCC1)CBr	d0027
	C[C@@H]1C[C@H](CC(C1)n2c3ccc(cc3[nH+]c2[C@@H](C)Cl)F)C	d0028
	Cc1ccc[nH+]c1C[C@H](c2ccc(s2)Br)Cl	d0029
	Cc1cc(ccc1Br)/[NH+]=C/c2ccc(cc2)N(C)C	d0030
	CC[C@@H]1CC[C@H]([C@@H]1C)n2c3ccc(cc3[nH+]c2[C@@H](C)Cl)F	d0031
	CC[C@H]1CC[C@@H]([C@@H]1C)n2c([nH+]c3c2c(c(cc3)F)F)CCl	d0032
	C[C@H](c1ccccc1Cl)[NH+](C)CC(C)(C)CBr	d0033
	C1CCC(CC1)[NH+](CCBr)CC2CCCC2	d0034
	C[C@H](CC[NH+]1CC[C@@H]2CCCC[C@@H]2C1)CCCl	d0035
	Cc1cc(n([nH+]1)C)CC(C)(C)[C@@H]2CC[C@H](C[C@@H]2Cl)C	d0036
	C[C@H](c1cc[nH+]cc1)[C@H](c2cc3ccccc3o2)Br	d0037
	Cc1ccccc1CC[C@@H]([C@H](C)c2cc[nH+]cc2)Br	d0038
	C[C@@H](C[C@@H]([C@@H](C)c1cc[nH+]cc1)Br)C(C)(C)C	d0039
	Cc1ccc[nH+]c1C[C@H](c2ccc(cc2)Cl)Br	d0040
	Cc1ccccc1CC[C@H](Cc2c(ccc[nH+]2)C)Br	d0041
	C[C@H](C[C@@H]([C@@H](C)c1cccc[nH+]1)Br)C(C)(C)C	d0042
	C[C@H](C[C@H]([C@@H](C)c1cccc[nH+]1)Br)C(C)(C)C	d0043
	CC(C)(C)[C@@H](C[NH+](C)C1CCCCCC1)CS	d0044
	CC(C)(C)[C@@H](C[NH+]1CCC[C@@H]1C2CCCC2)CS	d0045
	Cc1ccc2c(c1)n(c([nH+]2)CCl)[C@@H](C)c3ccc(cc3)F	d0046
	Cc1ccc2c(c1)n(c([nH+]2)[C@H](C)Cl)[C@H](C)c3ccsc3	d0047
	Cc1ccc2c(c1)n(c([nH+]2)CCl)Cc3ccc(s3)Cl	d0048
	Cc1ccsc1Cn2c3ccc(cc3[nH+]c2CCl)Cl	d0049
	c1cc2cc(ccc2[nH+]c1)/N=C\c3ccc(cc3Cl)Cl	d0050
Fc1ccc(cc1C)C1(CCCCC1)N1CCCCC1	CC(C)(C)C(=O)c1cc2cc3ccccc3[nH+]c2s1	d0051
	Cc1ccc(c([nH+]1)SCc2ccc(cc2)C(C)(C)C)C#N	d0052
	c1ccc2c(c1)cccc2/[NH+]=C\c3ccc(cc3)Br	d0053
	c1ccc(cc1)CCn2c3ccc(cc3[nH+]c2CCl)Cl	d0054
	CC(C)(C)[C@H]1CC[C@H]([C@@H](C1)[NH+](C)C2CCCC2)C#N	d0055
	C[C@H]1CCC[C@@H]([C@@H]1C)n2c3cccc(c3[nH+]c2CCCl)F	d0056
	c1cc(cc(c1)Cl)n2c3cccc(c3[nH+]c2CCCl)F	d0057
	CCc1ccc(cc1)n2c3cccc(c3[nH+]c2CCCl)F	d0058
	CCn1c2ccc(cc2[nH+]c1c3ccc(cc3)CCl)Cl	d0059
	C[C@H](CC(C)C)n1c2c(cccc2Cl)[nH+]c1[C@H](C)Cl	d0060
	CC(C)Cn1c2ccccc2[nH+]c1Cc3ccc(cc3)Cl	d0061
	CCn1c2ccccc2[nH+]c1CSc3ccc(cc3)Cl	d0062
	CC[C@@H](C)Cn1c2ccccc2[nH+]c1c3ccccc3Cl	d0063
	CC(C)n1c2ccc(cc2[nH+]c1c3cccs3)C(F)(F)F	d0064
	CCn1c(c[nH+]c1SCC)c2ccc(c(c2)Cl)Cl	d0065
	CC[C@H]1CC[C@@H]([C@@H](C1)[NH+](C)Cc2ccc(s2)Cl)C#N	d0066
	Cc1ccc(cc1)[C@@H](C)n2c3ccccc3[nH+]c2CCCl	d0067
	CC(C)(C)Sc1[nH+]c2ccccc2n1Cc3ccccc3	d0068
	CC[C@H](C)c1ccc(cc1)/[NH+]=C/c2c(n(c3c2cccc3)C)C	d0069
	Cc1c(sc2c1c(c(c([nH+]2)C)C(=O)C)c3ccccc3)C	d0070
	C[C@@H]1CC[C@H]([C@@H](C1)C)n2c3cccc(c3[nH+]c2[C@@H](C)Cl)F	d0071
	C[C@H]1CC[C@@H]([C@@H](C1)C)n2c3ccc(cc3[nH+]c2CCCl)F	d0072
	C[C@@H]1CC[C@H]([C@@H](C1)C)n2c3ccc(cc3[nH+]c2CCCl)F	d0073
	Cc1cc([nH+]c(c1CCl)N2CCC[C@@H](CC2)C(C)(C)C)C	d0074
	C[C@H]1C[C@@H](CC(C1)n2c3ccc(cc3[nH+]c2CCCl)F)C	d0075
	C[C@@H]1C[C@@H](CC(C1)n2c3ccc(cc3[nH+]c2[C@@H](C)Cl)F)C	d0076
	CC[C@H]1CC[C@@H]([C@@H]1C)n2c3ccc(cc3[nH+]c2CCCl)F	d0077
	CC[C@H]1CC[C@H]([C@@H]1C)n2c3ccc(cc3[nH+]c2[C@@H](C)Cl)F	d0078
	CC[C@@H]1CC[C@@H]([C@@H]1C)n2c3cc(ccc3[nH+]c2CCCl)F	d0079
	CCC[C@@H]1CC[C@@H]([C@@H](C1)[NH+]2CCC[C@@H](C2)C(F)(F)F)C#N	d0080
	CCC[C@H]1CC[C@@H]([C@@H](C1)[NH+]2CCC(CC2)C(F)(F)F)C#N	d0081
	C[C@H](CC(C)(C)Cc1cc[nH+]c2c1cccc2)Br	d0082
	C[C@@H](CC(C)(C)Cc1ccc2ccccc2[nH+]1)Br	d0083
	C[C@H](c1cc[nH+]cc1)[C@@H](c2c(cccc2Cl)Cl)Cl	d0084
	CC(C)(C)C1CCC(CC1)[C@H](Cc2cc[nH+]cc2)Cl	d0085
	Cc1cc(cc(c1)F)n2c3ccc(cc3[nH+]c2CCCl)F	d0086
	C[C@H](c1[nH+]c2ccc(cc2n1CC3C(C3(C)C)(C)C)F)Cl	d0087
	C[C@@H](c1[nH+]c2c(n1CC3C(C3(C)C)(C)C)cccc2F)Cl	d0088
	C[C@H](c1[nH+]c2c(n1CC3C(C3(C)C)(C)C)cccc2F)Cl	d0089
	Cc1ccc(cc1)Cn2c3cc(ccc3[nH+]c2CCCl)C	d0090
	Cc1ccc2c(c1)n(c([nH+]2)CCCl)Cc3ccc(cc3)F	d0091
	Cc1ccc2c(c1)n(c([nH+]2)[C@@H](C)Cl)C3C[C@@H](C[C@@H](C3)C)C	d0092
	Cc1ccc2c(c1)n(c([nH+]2)[C@@H](C)Cl)c3cc(cc(c3)F)C	d0093
	CC(C)Cn1c2cc(c(cc2[nH+]c1CCCl)Cl)Cl	d0094
	CC(=C)Cn1c2ccccc2[nH+]c1/C=C\c3ccc(cc3)Cl	d0095
	Cc1csc([nH+]1)/N=C\c2c3ccccc3cc4c2cccc4	d0096
	CCC(C)(C)n1c2cc(c(cc2[nH+]c1CCCl)Cl)F	d0097
	CC(C)(C)Cn1c2cc(c(cc2[nH+]c1CCCl)Cl)F	d0098
	C[C@@H](Cn1c2cc(c(cc2[nH+]c1CCl)Cl)F)C(C)C	d0099
	Cc1cc(c(nc1)[NH+]2CCC(=CC2)C(C)(C)C)Br	d0100
FC(Oc1cccc(c1)C1(CCCCC1)N1CCCCC1)(F)F	Cc1c(sc(n1)c2ccc(cc2)Cl)c3ccc4ccccc4[nH+]3	d0101
	Cc1ccc2c(c1)cc3cc(sc3[nH+]2)C(=O)N(C)c4ccc(c(c4)C)C	d0102
	Cc1ccc(cc1)c2csc(n2)SCc3cn4cc(ccc4[nH+]3)C	d0103
	C[C@H]1CCc2c(sc3c2c(cc([nH+]3)c4ccccc4)c5ccco5)C1	d0104
	C[NH+](Cc1ccc2ccccc2c1)Cc3cc4cnc5ccccc5c4o3	d0105
	C[NH+](Cc1ccc(cc1)F)Cc2csc(n2)c3ccccc3Cl	d0106
	c1ccc2c(c1)c(c(s2)/C=[NH+]/c3ccc(cc3)Br)S	d0107
	C/C=C(/C/[NH+]=c/1\cc(oc2c1cccc2)c3ccccc3)\OC=C	d0108
	Cc1cc(ccc1n2c3ccccc3[nH+]c2[C@H](C)Cl)Br	d0109
	c1cc2c(cc1F)[nH+]c(n2c3cc(cc(c3)Cl)Cl)CCCl	d0110
	Cc1ccc(cc1n2c3ccccc3[nH+]c2[C@@H](C)Cl)Br	d0111
	C[NH+](C)C[C@@H]1CCCC[C@@H]1OC(=O)c2ccc(c(c2)Cl)Cl	d0112
	C[NH+](C)C[C@H]1CCCC[C@H]1OC(=O)c2ccc(c(c2)Cl)Cl	d0113
	C=CCn1c2ccccc2[nH+]c1[C@H](c3ccccc3)Sc4ccccc4	d0114
	c1ccc(c(c1)c2[nH+]c3ccccc3n2Cc4ccc(cc4)Cl)Cl	d0115
	CC(C)(C)c1ccc(cc1)Cn2c3ccccc3[nH+]c2c4cccnc4	d0116
	Cc1cc(c(c(c1C)Cn2c3ccccc3[nH+]c2/C=C/c4ccco4)C)C	d0117
	CC(C)(C)c1[nH+]c2ccccc2n1Cc3ccc(cc3)Br	d0118
	CC[C@@H](c1ccccc1)c2[nH+]c3cc(ccc3n2Cc4ccccc4)Cl	d0119
	C[C@@H](c1ccc(s1)Cl)n2c3cccc(c3[nH+]c2CCCl)F	d0120
	c1ccc(cc1)c2[nH+]n(/c(=N\CCS)/s2)c3ccccc3	d0121
	Cc1ccccc1/[NH+]=C/c2cn(nc2c3ccccc3)c4ccccc4	d0122
	CCCCc1ccc(cc1)/[NH+]=C/c2cccn2c3ccc(cc3)Cl	d0123
	Cn1c2ccccc2[nH+]c1/N=C/c3c4ccccc4cc5c3cccc5	d0124
	c1ccc(cc1)Cc2ccccc2/[NH+]=C/C3=CCC(=N3)c4ccc(cc4)F	d0125
	C[C@H](c1[nH+]c2cc(ccc2n1[C@@H](C)C3CCCC3)Br)Cl	d0126
	C[C@H]1CC[C@@H]([C@@H](C1)C)n2c3ccc(cc3[nH+]c2CCl)Br	d0127
	Cn1c2ccccc2[nH+]c1SCc3csc(n3)c4ccccc4F	d0128
	Cc1cc(cc(c1)n2c(cc(c2C)/C=[NH+]\c3ccc(cc3)N(C)C)C)C	d0129
	CC(C)(C)[C@H](C[NH+](C)Cc1ccc(s1)Cl)CBr	d0130
	C[C@H]1CCC[C@H](C1)n2c3cc(ccc3[nH+]c2[C@@H](C)Cl)Br	d0131
	C[C@@H](CCCC(C)C)n1c2cc(ccc2[nH+]c1CCl)Br	d0132
	CC(C)(C)CC(C)(C)n1c2cc(ccc2[nH+]c1CCl)Br	d0133
	CC[C@@H](C)C[C@@H](C)n1c2ccc(cc2[nH+]c1[C@@H](C)Cl)Br	d0134
	CC[C@@H](C)C[C@@H](C)n1c2cc(ccc2[nH+]c1CCCl)Br	d0135
	CC[C@H](C)C[C@@H](C)n1c2cc(ccc2[nH+]c1CCCl)Br	d0136
	c1ccc2c(c1)ccc([nH+]2)C[C@@H](c3ccc(cc3Cl)Cl)Cl	d0137
	C[C@H](c1cc[nH+]cc1)[C@H](C2CCC(CC2)C(C)(C)C)Br	d0138
	C[C@H](c1cc[nH+]cc1)[C@H](c2ccc(cc2Cl)Cl)Br	d0139
	CCCCC1CCC(CC1)[C@@H]([C@@H](C)c2cc[nH+]cc2)Br	d0140
	Cc1ccc([nH+]c1)C[C@@H](C2CCC(CC2)C(C)(C)C)Br	d0141
	Cc1ccc([nH+]c1)C[C@H](C2CCC(CC2)C(C)(C)C)Br	d0142
	Cc1ccc([nH+]c1)C[C@H](c2ccc(cc2Cl)Cl)Br	d0143
	CC(C)(C)[C@H](C[NH+](C1CCCCC1)C2CCCCC2)CS	d0144
	Cc1ccc2c(c1)n(c([nH+]2)[C@@H](C)Cl)c3ccc(cc3Cl)Cl	d0145
	Cc1ccc2c(c1)n(c([nH+]2)[C@H](C)Cl)c3ccc(cc3Cl)Cl	d0146
	Cc1ccc2c(c1)n(c([nH+]2)[C@H](C)Cl)[C@H](C)c3ccc(s3)Cl	d0147
	C[C@@H]1CCCC[C@H]1n2c3cc(c(cc3[nH+]c2CCCl)Cl)Cl	d0148
	CC[C@H](C)C[C@@H](C)n1c2cc(c(cc2[nH+]c1[C@@H](C)Cl)Cl)Cl	d0149
	CC[C@H](C)O/C(=N\c1ccc[nH+]c1)/c2ccc(cc2Cl)Cl	d0150
COc1cc(OC)cc(c1)C1(CCCCC1)N1CCCCC1	c1cc(c(cc1n2c3ccc(cc3[nH+]c2CCl)F)Cl)Cl	d0151
	CC(C)c1ccc(cc1)n2c3ccc(cc3[nH+]c2CCl)F	d0152
	C[C@H](c1[nH+]c2cc(ccc2n1C(C)(C)C)Br)Cl	d0153
	c1cc(c(c(c1)F)n2c3ccc(cc3[nH+]c2CCCl)Cl)F	d0154
	C[C@@H](c1[nH+]c2cc(ccc2n1c3ccc(cc3)F)Cl)Cl	d0155
	C[C@H](c1[nH+]c2cc(ccc2n1c3ccc(cc3F)F)Cl)Cl	d0156
	Cc1ccc(cc1C)n2c3ccc(cc3[nH+]c2[C@H](C)Cl)Cl	d0157
	Cc1ccc(c(c1)F)n2c3ccc(cc3[nH+]c2[C@@H](C)Cl)Cl	d0158
	C[C@H](c1[nH+]c2cc(ccc2n1CC3CCC3)Br)Cl	d0159
	c1cc2c(cc1F)[nH+]c(n2c3cc(ccc3F)Cl)CCCl	d0160
	CCC(C)(C)[C@@H]1CC[C@@H]([C@@H](C1)[NH+]2CCC(CC2)C)C#N	d0161
	c1cc2c(c(c1)F)[nH+]c(n2c3c(cccc3F)F)CCCl	d0162
	CC(C)n1c2cccc(c2[nH+]c1c3cccc(c3)CCl)F	d0163
	c1ccc2=[NH+]CC(=c2c1)/C=N/c3ccc(c(c3)Cl)Br	d0164
	CCn1c2ccc(cc2[nH+]c1Cc3ccc(cc3)Cl)Cl	d0165
	C[C@H]1CC[C@@H]([C@@H](C1)[NH+](C)Cc2cccc(c2)Br)C#N	d0166
	c1c(cc(nc1Cl)Cl)C[NH+]2CC3C[C@H]4C[C@@H](C3)CC2C4	d0167
	C[C@H](c1ccc(cc1)Cl)n2c3ccc(cc3[nH+]c2CCl)F	d0168
	C[C@@H]1C[C@@H]1n2c3ccc(cc3[nH+]c2[C@@H](C)Cl)Cl	d0169
	C[C@@H](c1ccsc1)n2c3ccc(cc3[nH+]c2[C@H](C)Cl)Cl	d0170
	C[C@H]1CCCC[C@H]1[NH+](C)Cc2c(ccc(n2)Cl)Cl	d0171
	c1ccc2=[NH+][C@H]3CN(CCC3=c2c1)Cc4cccc(c4Cl)Cl	d0172
	Cc1cc(ccc1Br)/N=C/C2=c3ccccc3=[NH+]C2	d0173
	C[C@@H]1CC[C@@H]([C@@H](C1)C)n2c3ccc(cc3[nH+]c2[C@@H](C)Cl)F	d0174
	C[C@H](c1[nH+]c2ccc(cc2n1Cc3ccc(s3)Cl)F)Cl	d0175
	Cc1c([nH+]c(s1)N2CCC(CC2)C)c3ccc(cc3)F	d0176
	C[C@H](c1[nH+]c2cc(ccc2n1C3CCC(CC3)(C)C)Cl)Cl	d0177
	CCCn1c2cc(ccc2[nH+]c1[C@H](C)Cl)Br	d0178
	C[C@@H]1CC[C@@H]([C@@H]1C)n2c3cc(ccc3[nH+]c2CCl)F	d0179
	C[C@@H]1CC[C@@H]([C@@H]1C)n2c3cccc(c3[nH+]c2CCl)F	d0180
	C[C@H]1CC[C@H]([C@@H]1C)n2c3c(ccc(c3F)F)[nH+]c2[C@@H](C)Cl	d0181
	CC[C@@H]1CC[C@@H]([C@@H]1C)n2c3ccc(cc3[nH+]c2[C@@H](C)Cl)Cl	d0182
	Cc1cc(sc1C)Cn2c3cc(ccc3[nH+]c2[C@@H](C)Cl)F	d0183
	C[C@H]1C[C@@H]1n2c3cc(ccc3[nH+]c2CCCl)Br	d0184
	c1ccc2c(c1)[nH+]c(n2c3c(cccc3Cl)Cl)CCl	d0185
	C[C@@H]1CC[C@@H](N(C1)c2c3ccccc3cc([nH+]2)CCl)C	d0186
	CC(C)[C@@H]1CCC[NH+]1[C@@H]2C[C@@H](CC[C@@H]2C#N)C(C)(C)C	d0187
	Cc1cccc(c1n2c3cccc(c3[nH+]c2CCCl)F)Cl	d0188
	Cc1cc(cc(c1)F)n2c3ccc(cc3[nH+]c2CCCl)Cl	d0189
	C[C@H](c1[nH+]c2cc(ccc2n1C3C(C3(C)C)(C)C)Cl)Cl	d0190
	CCn1c2ccccc2[nH+]c1C[C@@H]3CC[C@H]([C@@H]3C)Br	d0191
	CCCn1cc[nH+]c1c2ccc(cc2)I	d0192
	Cc1cscc1Cn2c3c(ccc(c3F)F)[nH+]c2[C@H](C)Cl	d0193
	Cc1cscc1Cn2c3cc(ccc3[nH+]c2[C@H](C)Cl)F	d0194
	CC(C)(C)c1cc([nH+]cc1OC2CC2)I	d0195
	CC1CCC(CC1)n2c3cc(ccc3[nH+]c2[C@H](C)Cl)Cl	d0196
	C[C@@H]1CCC[C@H](C1)n2c3cc(c(cc3[nH+]c2[C@@H](C)Cl)Cl)F	d0197
	CC[C@@H]1CC[C@@H]([C@@H]1C)n2c3cc(c(cc3[nH+]c2CCl)Cl)F	d0198
	CC[C@@H]1CC[C@H]([C@@H]1C)n2c3cc(c(cc3[nH+]c2CCl)Cl)F	d0199
	CC(C)(C)n1c2cc(c(cc2[nH+]c1CCCl)Br)F	d0200
CC(Oc1cccc(c1)C1(CCCCC1)N1CCCCC1)C	c1ccc(cc1)c2c3ccccc3ncc2c4ccc5ccccc5[nH+]4	d0201
	CC(=CCC/C(=C/C[NH+]1CCN(CC1)c2ccccc2Cl)/C)C	d0202
	Cc1ccc(cc1)[NH+]=Cc2ccc(cc2)/C=N/c3ccc(cc3)C	d0203
	c1ccc(cc1)CCc2[nH+]c3ccccc3n2Cc4ccc(cc4)F	d0204
	Cc1ccc2c(c1)/c(=[NH+]\C(C)C)/cc(o2)c3ccc(cc3)Cl	d0205
	CCC(C)(C)n1c2ccc(cc2[nH+]c1CCCl)Br	d0206
	CCn1c2cc(c(cc2[nH+]c1c3cccnc3Cl)Cl)Cl	d0207
	CN(C)c1ccc(cc1)/C=C/c2cc[nH+]c3c2c4ccccc4cc3	d0208
	CCCCCn1c2ccccc2[nH+]c1Cc3ccc(cc3)Cl	d0209
	Cc1ccccc1Cn2c3ccccc3[nH+]c2c4ccccc4Cl	d0210
	CCCn1c2ccccc2[nH+]c1Cc3ccc(cc3)c4ccccc4	d0211
	CC(C)n1c2ccc(cc2[nH+]c1Cc3ccccc3)C(F)(F)F	d0212
	C[C@H](C(C)(C)C)[NH+](C)CC(=O)c1ccc(cc1Cl)Cl	d0213
	CC[C@H](c1ccccc1)n2c3ccccc3[nH+]c2CCCl	d0214
	CCC[C@@H](CC)n1c2cc(ccc2[nH+]c1CCCl)F	d0215
	C[C@H](c1ccc(cc1)Cl)[NH+](C)CC(=O)c2ccc(s2)Cl	d0216
	C[C@@H](CCC(C)C)n1c2ccc(cc2[nH+]c1[C@H](C)Cl)Cl	d0217
	C[C@@H](CCC(C)C)n1c2c(cccc2Cl)[nH+]c1[C@@H](C)Cl	d0218
	C[C@@H](CCC(C)C)n1c2cccc(c2[nH+]c1[C@H](C)Cl)F	d0219
	C[C@H](CC(C)C)N(C)c1cc(c2ccccc2[nH+]1)CCl	d0220
	CN(C)c1ccc(c(c1)Cl)/C=[NH+]/c2cccc(c2)C(F)(F)F	d0221
	CCC[C@@H]1CCC[NH+](CC1)C[C@@H]2C[C@@H](CCC2=O)C(C)C	d0222
	C[C@H](Cn1c2ccc(cc2[nH+]c1CCl)Br)C(C)C	d0223
	CCc1cc(n([nH+]1)C)C[C@H]([C@H](C)Br)C(C)C	d0224
	CC[C@@H]1CC[C@@H]([C@@H]1C)n2c3ccc(cc3[nH+]c2CCCl)Cl	d0225
	CC[C@H]1CC[C@H]([C@@H]1C)n2c3ccc(cc3[nH+]c2CCCl)Cl	d0226
	C[C@@H](c1ccccc1Cl)[NH+](C)C[C@H](CBr)C(C)C	d0227
	CCC(CC)(CC)n1c([nH+]c2c1c(c(cc2)F)F)CCCl	d0228
	C[C@H](c1[nH+]c2ccc(cc2n1CCC(C)C)Br)Cl	d0229
	CCC[C@H](C)n1c2cc(ccc2[nH+]c1CCCl)Br	d0230
	CCC(CC)n1c2cc(ccc2[nH+]c1CCCl)Br	d0231
	CCCC[C@H](C)n1c2cc(ccc2[nH+]c1CCl)Br	d0232
	CC(C)CCCn1c2cc(ccc2[nH+]c1CCl)Br	d0233
	CCCCCCn1c2cc(ccc2[nH+]c1CCl)Br	d0234
	Cc1ccc[nH+]c1C[C@@H](c2ccc(cc2C)Br)Cl	d0235
	C[C@@H](C[C@@H](Cc1ccc2ccccc2[nH+]1)Br)C(C)(C)C	d0236
	CC[C@@](C)(C(=O)c1cc(ccc1Cl)Cl)[NH+](CC)CC	d0237
	CC1(C(C1(C)C)Cn2c3ccc(cc3[nH+]c2CCCl)Cl)C	d0238
	CC(C)CC[NH+](Cc1c(ccc(n1)Cl)Cl)C2CCCC2	d0239
	CCC[C@@H]1CC[C@@H]([C@@H](C1)[NH+](CC(C)C)C2CCCC2)C#N	d0240
	CC[C@@H]1CC[C@H]([C@@H](C1)[NH+](CCC(C)C)C2CCCC2)C#N	d0241
	CCC[C@H](C)n1c2cc(c(cc2[nH+]c1CCCl)Cl)Cl	d0242
	C[NH+](C)CCSc1c2cc(ccc2nc3c1CCCCC3)Cl	d0243
	Cc1ccccc1/[NH+]=C/c2ccc(cc2)/C=N\c3ccccc3C	d0244
	CCC[C@H](C)n1c2cc(c(cc2[nH+]c1CCCl)Cl)F	d0245
	CCC(CC)n1c2cc(c(cc2[nH+]c1CCCl)Cl)F	d0246
	c1c2c(cc(c1Cl)F)n(c([nH+]2)CCCl)CC3CCCC3	d0247
	CC[C@H](C)C[C@@H](C)n1c2cc(c(cc2[nH+]c1[C@@H](C)Cl)Cl)F	d0248
	CC[C@H](C)C[C@H](C)n1c2cc(c(cc2[nH+]c1[C@@H](C)Cl)Cl)F	d0249
	CC[C@@H](C)C[C@H](C)n1c2cc(c(cc2[nH+]c1CCl)Cl)F	d0250
CCOc1cccc(c1)C1(CCCCC1)N1CCCCC1	CC[C@H](C)c1ccc(cc1)SCCc2cccc[nH+]2	d0251
	C=CC[NH+](CC=C)Cc1cc2cccc3c2c4c1cccc4cc3	d0252
	CCC(C)(C)n1c2ccc(cc2[nH+]c1CCl)Cl	d0253
	c1cc2c(cc1Cl)[nH+]c(n2CC3CCCC3)CCl	d0254
	CSc1ccc(cc1)/C=C/c2cc[nH+]c3c2cccc3	d0255
	CCCCC[NH+](C)Cc1ccc(cc1)Br	d0256
	CC(C)(C)C1CC[NH+](CC1)CCCCCBr	d0257
	C[C@H]1CC[C@H]([C@@H](C1)C)n2c3cc(ccc3[nH+]c2[C@@H](C)Cl)F	d0258
	CC(C)[C@H]1CCC[NH+](CC1)CCCCCBr	d0259
	CC(C)(C)[C@@H]1CCC[NH+](CC1)CCCCCBr	d0260
	CCC[C@@H](C[NH+](C)C1CCCCCC1)CBr	d0261
	CCC[C@H](C[NH+](C)[C@@H]1CCC[C@@H](C1)C)CBr	d0262
	CCC[C@@H](C[NH+](C)[C@@H]1CCCC[C@@H]1C)CBr	d0263
	CCC[C@@H](C[NH+]1CCC[C@@H](CC1)CC)CBr	d0264
	CC[NH+](C[C@H](CBr)C(C)C)C1CCCCC1	d0265
	C[C@@H](C(C)C)[NH+](C)C[C@@H](CBr)C(C)C	d0266
	CC(C)[C@@H](C[NH+](C)CC1CCCCC1)CBr	d0267
	C[C@H](CC[NH+](C)C1CCCCCC1)CCBr	d0268
	CC[C@@H]1CCC[NH+](CC1)CC[C@@H](C)CCBr	d0269
	CC[C@H]1CCC[NH+](CC1)CC[C@@H](C)CCBr	d0270
	CCCCC[C@@H]([C@@H](C)c1cc[nH+]cc1)Br	d0271
	Cc1ccc([nH+]c1)C[C@H]([C@@H](C)C(C)C)Br	d0272
	CC[C@H](C[NH+](C)[C@@H](C)c1ccc(cc1)Cl)CBr	d0273
	CCC(CC)(C[NH+](C)[C@H]1CCC[C@@H](C1)C)CBr	d0274
	CCC[C@H](C[NH+]1CCC[C@@H]1C2CCCC2)CBr	d0275
	CCC[C@H](C[NH+]1CCC[C@@H](CC1)C(C)C)CBr	d0276
	Cc1ccc(cc1)C[NH+](C)C[C@H](CBr)C(C)C	d0277
	Cc1ccccc1C[NH+](C)C[C@H](CBr)C(C)C	d0278
	CCC1CCC(CC1)[NH+](C)C[C@@H](CBr)C(C)(C)C	d0279
	CC(C)(C)C[NH+](C)C[C@@H](CBr)c1ccccc1	d0280
	CCCCC[NH+](C)Cc1ccc(cc1)I	d0281
	C[C@H](CC[NH+]1CCC[C@@H](CC1)C(C)C)CCBr	d0282
	CCCCC1CCC(CC1)[C@H]([C@@H](C)c2cc[nH+]cc2)Cl	d0283
	C[C@H](c1cc[nH+]cc1)[C@H](CCCc2ccccc2)Br	d0284
	CCCC[NH+](Cc1cc(cc(c1)Br)F)C2CC2	d0285
	CC[C@@H](C)C[NH+](CC)Cc1cc(cc(c1)Br)F	d0286
	CCc1ccc([nH+]c1)CCC[C@@H](C(C)(C)C)Br	d0287
	CC(C)[C@H]1CN2CCCC[C@@H]2C[NH+]1C3CCCCCC3	d0288
	CC[C@@H]1CN2CCCC[C@@H]2C[NH+]1[C@@H](C)C3CCCCC3	d0289
	CCC[C@@H](C[NH+]1CCC(CC1)C(C)(C)C)CS	d0290
	CCCC1CC[NH+](CC1)C[C@H](CS)C(C)(C)C	d0291
	C1CC[C@H]2C[NH+](CC[C@@H]2C1)CCCCCCS	d0292
	CC[C@@H](C[NH+](C)[C@@H](C)c1ccccc1Cl)CS	d0293
	C[C@@H](c1ccccc1Cl)[NH+](C)C[C@H](CS)C(C)C	d0294
	C[C@H](C(C)(C)C)[NH+](C)C[C@@H](CS)c1ccccc1	d0295
	CCC[C@@H](C[NH+]1CCC[C@@H]1C2CCCC2)CS	d0296
	CCC1CCC(CC1)[NH+](C)C[C@@H](CS)C(C)(C)C	d0297
	C[NH+](Cc1ccc(s1)Cl)C[C@@H](CS)c2ccccc2	d0298
	CCC[C@H](C[NH+](C)C1CCC(CC1)(C)C)CBr	d0299
	CCC(CC)(C[NH+](C)C1CCC(CC1)(C)C)CS	d0300
C1CCC(CC1)(N1CCCCC1)c1ccc2c(c1)OCC2	c1ccc2c(c1)cc(c([nH+]2)N3CCCC3)c4ccc(cc4)Cl	d0301
	Cc1cc([nH+]c2c1cc(c(n2)Br)Br)C	d0302
	c1ccc(cc1)c2cc(nc3c2cccc3)c4ccc[nH+]c4	d0303
	Cc1ccc(c(c1)C)c2cn3cc(cc(c3[nH+]2)C)Br	d0304
	CC1CCC(CC1)n2c3c(cccc3Cl)[nH+]c2[C@H](C)Cl	d0305
	CC(C)(C)n1c([nH+]c2c1c(ccc2)Cl)CCCl	d0306
	C[C@H](c1[nH+]c2cc(ccc2n1c3ccccc3F)Cl)Cl	d0307
	Cc1cccc(c1C)n2c3ccc(cc3[nH+]c2[C@H](C)Cl)Cl	d0308
	C[C@@H]1C[C@@H]1n2c3ccc(cc3[nH+]c2[C@@H](C)Cl)Br	d0309
	C[C@H]1C[C@H]1n2c3ccc(cc3[nH+]c2[C@@H](C)Cl)Br	d0310
	C1CC[C@H](C(=O)CC1)C[NH+]2CC[C@@H]3CCCC[C@@H]3C2	d0311
	c1cc2c(cc1F)[nH+]c(n2c3cc(c(c(c3)F)F)F)CCl	d0312
	CC[C@@H](c1cc[nH+]c2c1cccc2)[C@@H](C)Br	d0313
	CC[C@@H](c1cc[nH+]c2c1cccc2)[C@H](C)Br	d0314
	CC(C)[C@H](Cc1c2ccsc2cc[nH+]1)Br	d0315
	CC1=CC[C@@H]2[C@H](C1)CN3[C@@H]2[C@@H]4C(=c5ccccc5=[NH+]4)CC3	d0316
	C[C@@H]1CN(c2ccccc2[NH+]=C1S)Cc3ccccc3	d0317
	CC1CCC(CC1)[NH+](C)Cc2ccc(s2)Br	d0318
	c1cc(c(cc1c2cn3cc(ccc3[nH+]2)Cl)Cl)Cl	d0319
	CC[C@H]1CCC[NH+](CC1)C[C@@H](C(F)(F)F)Br	d0320
	C[C@@H]1C[C@@H](CC(C1)n2c3cc(ccc3[nH+]c2CCl)F)C	d0321
	CC(C)[C@H]1CCC[NH+](CC1)C[C@@H](C(F)(F)F)Br	d0322
	C[C@H](c1cc[nH+]cc1)[C@@H](c2c(ccs2)Br)Cl	d0323
	Cc1ccc([nH+]c1)C[C@@H](c2ccc(s2)Br)Cl	d0324
	Cc1ccc(s1)[C@@H]([C@@H](C)c2cc[nH+]cc2)Br	d0325
	CC[C@@H](C)[C@H](Cc1c(ccc[nH+]1)C)Br	d0326
	Cc1ccc([nH+]c1)C[C@H](c2ccc(s2)Cl)Br	d0327
	c1ccc2cc(ccc2c1)/[NH+]=C/c3ccc(cc3)Br	d0328
	C[C@H]1CC[C@@H]([C@@H]1C)n2c3ccc(cc3[nH+]c2[C@@H](C)Cl)F	d0329
	C[C@@H]1CC[C@H]([C@@H]1C)n2c3c(ccc(c3F)F)[nH+]c2[C@@H](C)Cl	d0330
	C[C@H](c1cc[nH+]cc1)[C@@H](c2c(ccs2)Cl)Br	d0331
	C[C@@H](C[NH+](C)Cc1cc(ccc1Cl)Cl)Br	d0332
	C[C@@H](C[NH+](C)Cc1c(cccc1Cl)Cl)Br	d0333
	C[C@@H](C(C)C)[NH+](C)Cc1ccc(cc1)I	d0334
	C[C@H](c1[nH+]c2cc(ccc2n1c3ccsc3)Cl)Cl	d0335
	c1cc(ccc-2[nH+]c-3cccc(=O)c3c2c1)Br	d0336
	C[C@H](c1cc[nH+]cc1)[C@H](c2ccc(c(c2)C(F)(F)F)F)Cl	d0337
	Cc1ccc(cc1Cl)[C@H]([C@@H](C)c2cc[nH+]cc2)Cl	d0338
	C[C@@H](c1cccc[nH+]1)[C@@H](c2ccccc2Br)Cl	d0339
	C[C@H](c1cccc[nH+]1)[C@H](c2ccc(cc2)Br)Cl	d0340
	CCc1ccc(cc1)[C@H]([C@@H](C)c2cccc[nH+]2)Cl	d0341
	C[C@@H](c1cccc[nH+]1)[C@H](c2ccc(cc2)C(F)(F)F)Cl	d0342
	Cc1cc(sc1C)[C@@H]([C@H](C)c2cc[nH+]cc2)Br	d0343
	Cc1ccc([nH+]c1)C[C@H](c2cc(c(s2)C)C)Br	d0344
	C[C@H]1CCCC[C@@H]1[NH+](C)Cc2cc(cc(c2)Br)F	d0345
	C[C@H]1CCCCC[C@@H]1[NH+]2C[C@@H]3CCCCN3C[C@@H]2C	d0346
	CC(C)[C@@H]1C[NH+]2CCC[C@@H]2CN1C3CCCCCC3	d0347
	CC(C)[C@H]1C[NH+]2CCC[C@@H]2CN1C3CCCCCC3	d0348
	Cc1ccc2c(c1)n(c([nH+]2)[C@@H](C)Cl)c3ccc(cc3)F	d0349
	CC1(CCC(CC1)[NH+](C)C[C@@H](C(F)(F)F)Br)C	d0350
COc1ccc(cc1C)C1(CCCCC1)N1CCCCC1	CC(C)(C)c1ccc(cc1)n2c3ccccc3[nH+]c2CCl	d0351
	c1ccc2c(c1)ccc([nH+]2)/C=C/c3cc(sc3)Br	d0352
	C[C@@H]1CCCC[C@H]1n2c3ccc(cc3[nH+]c2CCl)Cl	d0353
	CC[C@H](C)n1c2ccc(cc2[nH+]c1[C@@H](C)Cl)Br	d0354
	C[C@@H]1CCCC[C@H]1n2c3ccc(cc3[nH+]c2CCCl)Cl	d0355
	Cc1ccc2c(c1)[nH+]c(n2c3cc(ccc3C)Cl)[C@@H](C)Cl	d0356
	c1cc2c(c(c1)Cl)n(c([nH+]2)CCCl)c3ccc(cc3)F	d0357
	Cc1cccc(c1C)n2c3c(cccc3Cl)[nH+]c2[C@H](C)Cl	d0358
	C[C@H](c1[nH+]c2cc(ccc2n1Cc3cccs3)Cl)Cl	d0359
	C[C@@H]1CCC[C@@H](C1)n2c3ccc(cc3[nH+]c2CCCl)Cl	d0360
	C[C@@H](c1ccccc1)n2c3cccc(c3[nH+]c2[C@H](C)Cl)F	d0361
	c1cc(ccc1CCl)c2[nH+]c3cc(ccc3n2C4CC4)Cl	d0362
	C[C@]12C[C@H](CC(C1)(C)C)[NH+](C2)CN3C[C@@]4(C[C@H]3CC(C4)(C)C)C	d0363
	Cc1ccccc1Cn2c3ccccc3[nH+]c2c4ccccc4C	d0364
	CC(C)n1c2ccc(cc2[nH+]c1Cc3ccc(cc3)Cl)Cl	d0365
	C[C@H](CC(C)C)[NH+](C)Cc1ccc(s1)Br	d0366
	CCC1CCC(CC1)[NH+](C)[C@@H]2CCCCC[C@@H]2C#N	d0367
	Cc1cc(cc(c1)/[NH+]=C/c2ccc(cc2)Br)C	d0368
	c1cc(cc(c1)Br)/C=N\c2cccc3c2ccc[nH+]3	d0369
	CCC[C@H](C[NH+]1C[C@@H](C[C@@H](C1)C)C)CBr	d0370
	C[C@@H]1CC[NH+]([C@@H](C1)C)C[C@@H](CBr)C(C)(C)C	d0371
	C[C@H](C[NH+](C)C)C(C)(C)Cc1ccc(cc1)Cl	d0372
	CC[C@@H](C[NH+]1CCC[C@@H](CC1)C(C)C)CBr	d0373
	C[C@@H]1C[C@H](CC(C1)n2c3cc(ccc3[nH+]c2CCCl)F)C	d0374
	CCC[C@H](C)[C@@H]([C@@H](C)c1cc[nH+]cc1)Br	d0375
	CCC[C@H](C)[C@H]([C@@H](C)c1cc[nH+]cc1)Br	d0376
	CC[C@@H]1CC[C@@H]([C@@H]1C)n2c3ccc(cc3[nH+]c2CCl)Cl	d0377
	C[C@@H]1CCCC[C@H]1[NH+](C)C[C@@H](CBr)C(C)(C)C	d0378
	CC(C)(C)[C@@H](C[NH+]1CCC[C@@H]1C2CCCC2)CBr	d0379
	Cc1ccccc1[NH+](C)C[C@@H](CBr)c2ccccc2	d0380
	Cc1ccc[nH+]c1C[C@@H](c2c(ccs2)Cl)Br	d0381
	C[C@H](c1[nH+]c2ccc(cc2n1C(C)(C)C)Br)Cl	d0382
	CC(C)[C@@H](CCCc1cc[nH+]c2c1cccc2)Cl	d0383
	C[C@@H]1[C@H](O[C@@H]([C@@H]1[C@@H](Cc2ccc3ccccc3[nH+]2)Cl)C)C	d0384
	Cc1ccc[nH+]c1C[C@@H](C[C@H](C)C(C)(C)C)Cl	d0385
	C[C@H]([C@H](Cc1ccc2ccccc2[nH+]1)Br)C(C)C	d0386
	C[C@H](c1cc[nH+]cc1)[C@@H](c2cc3c(s2)CCC3)Br	d0387
	Cc1ccc(cc1)CC[C@@H]([C@@H](C)c2cc[nH+]cc2)Br	d0388
	Cc1ccccc1CC[C@H]([C@@H](C)c2cc[nH+]cc2)Br	d0389
	C[C@@H](C[C@H]([C@@H](C)c1cccc[nH+]1)Br)C(C)(C)C	d0390
	Cc1ccc(cc1)CC[C@@H](Cc2ccc(c[nH+]2)C)Br	d0391
	CSc1ccc(cc1)[C@H](Cc2ccc3ccccc3[nH+]2)Cl	d0392
	Cc1cc(ccc1[NH+](C)[C@@H](C)Cc2cccs2)CCl	d0393
	CC(C)[C@H](C[NH+]1CCC(CC1)C(C)(C)C)CS	d0394
	Cc1ccc2c(c1)n(c([nH+]2)[C@H](C)Cl)c3cc(ccc3C)Cl	d0395
	Cc1ccc2c(c1)n(c([nH+]2)CCl)[C@H](C)c3ccc(s3)C	d0396
	Cc1ccc2c(c1)n(c([nH+]2)CCl)[C@@H](C)c3ccc(cc3)Cl	d0397
	Cc1ccc2c(c1)n(c([nH+]2)[C@@H](C)Cl)Cc3ccc(s3)C	d0398
	c1ccc(cc1)COc2cc[nH+]c3c2cc(cc3)Br	d0399
	Cc1ccc(cc1)n2c(cc(c2C)/C=[NH+]\c3ccc(c(c3)C)C)C	d0400
COc1ccc(cc1C1(CCCCC1)N1CCCCC1)OC	Cc1cc(c(c([nH+]1)Sc2ccc(cc2)Cl)C#N)C(F)(F)F	d0401
	Cc1cc(c2cc(ccc2[nH+]1)Br)OC/C=C(\C)/Cl	d0402
	c1ccc2c(c1)c(ccc2Cl)Oc3ccc(c[nH+]3)C(F)(F)F	d0403
	c1cc2cc(ccc2[nH+]c1)/C=C\C(=O)c3ccc(cc3)Br	d0404
	c1ccc2c(c1)[nH+]c(n2c3ccc(c(c3)Cl)Cl)CCl	d0405
	c1ccc2c(c1)[nH+]c(n2c3ccc(c(c3)Cl)Cl)CCCl	d0406
	C[C@H](c1[nH+]c2ccccc2n1c3c(cccc3F)F)Cl	d0407
	C[C@H](c1[nH+]c2cccc(c2n1c3ccccc3F)Cl)Cl	d0408
	c1cc(c(cc1n2c3ccc(cc3[nH+]c2CCCl)F)Cl)F	d0409
	C[C@@H](c1[nH+]c2cc(ccc2n1CC3CCC3)Br)Cl	d0410
	C[C@@H](c1[nH+]c2cc(ccc2n1CC3CCCC3)Cl)Cl	d0411
	CCC(C)(C)n1c2cccc(c2[nH+]c1[C@H](C)Cl)F	d0412
	c1ccn2cc([nH+]c2c1)c3cc(cc(c3)C(F)(F)F)C(F)(F)F	d0413
	c1ccc2c(c1)ccc(c2Br)OCc3cc[nH+]cc3	d0414
	C[C@@H](c1[nH+]c2cc(ccc2n1[C@H](C)C(C)C)Br)Cl	d0415
	Cn1c2ccc(cc2[nH+]c1CSc3ccc(cc3)Cl)Cl	d0416
	C[C@@H]1CC[C@@H]([C@@H](C1)[NH+](C)Cc2cccc(c2)Br)C#N	d0417
	Cc1ccc(s1)[C@@H](C)n2c3ccc(cc3[nH+]c2CCl)Cl	d0418
	Cc1ccc(s1)[C@@H](C)n2c3ccc(cc3[nH+]c2[C@H](C)Cl)F	d0419
	C[C@H](c1ccc(s1)Cl)n2c3cc(ccc3[nH+]c2CCl)F	d0420
	Cc1ccc(s1)Cn2c3cc(ccc3[nH+]c2[C@H](C)Cl)F	d0421
	C[C@@H](c1[nH+]c2ccc(c(c2n1Cc3cccs3)F)F)Cl	d0422
	C[C@@H](c1cccs1)n2c3c(ccc(c3F)F)[nH+]c2[C@@H](C)Cl	d0423
	C[C@@H]1CC[C@H]([C@@H](C1)C)n2c3ccc(cc3[nH+]c2[C@@H](C)Cl)Cl	d0424
	C[C@H]1CC[C@@H]([C@@H](C1)C)n2c3cc(ccc3[nH+]c2CCl)F	d0425
	C[C@@H]1CC[C@H]([C@@H](C1)C)n2c3ccc(cc3[nH+]c2CCCl)Cl	d0426
	C[C@@H]1C[NH+](C[C@H](S1)C)[C@@H](C)C(=O)c2ccc(cc2Cl)Cl	d0427
	c1cc(c(cc1F)Cl)COc2cc(c[nH+]c2)C#CCCl	d0428
	CC(C)c1ccc(cc1)c2cn3cc(ccc3[nH+]2)Br	d0429
	C[NH+](C)CC/C=C\1/c2ccccc2[S@@](=O)c3c1cc(cc3)Cl	d0430
	C[C@@H]1C[C@H](CC(C1)n2c3c(cccc3Cl)[nH+]c2[C@@H](C)Cl)C	d0431
	Cc1c[nH+]c(c(c1OC)C)C[C@H]2CC[C@@H]([C@@H]2C)Br	d0432
	Cc1cc(sc1C)Cn2c3ccccc3[nH+]c2[C@H](C)Cl	d0433
	Cc1cc(sc1C)Cn2c3ccc(cc3[nH+]c2CCl)Cl	d0434
	C[C@@H](C1CC1)n2c3cc(ccc3[nH+]c2CCl)Br	d0435
	C[C@@H]1C[C@@H]1n2c3cc(ccc3[nH+]c2CCCl)Br	d0436
	c1ccc2c(c1)c(cc[nH+]2)CC(=O)c3cccc(c3)Br	d0437
	Cc1c(oc(c1[C@H](Cc2ccc3ccccc3[nH+]2)Cl)C)C	d0438
	Cc1cc(c[nH+]c1N2CCC[C@H](C2)CCCl)Br	d0439
	Cc1cscc1Cn2c3ccc(cc3[nH+]c2[C@@H](C)Cl)Cl	d0440
	Cc1cscc1Cn2c3cc(ccc3[nH+]c2[C@@H](C)Cl)F	d0441
	C[C@H]1CCC[C@@H]1n2c3cc(c(cc3[nH+]c2CCCl)Cl)Cl	d0442
	C[C@H]1CCC[C@H]1n2c3cc(c(cc3[nH+]c2CCCl)Cl)Cl	d0443
	CC(C)[C@@H]1CCCN(CC1)C2=[NH+]C[C@H](S2)CBr	d0444
	CC(C)(C)[C@@H]1CCCN(CC1)C2=[NH+]C[C@H](S2)CBr	d0445
	C[C@H]1CCC[C@H](C1)n2c3cc(c(cc3[nH+]c2[C@@H](C)Cl)Cl)F	d0446
	C[C@H]1CCC[C@@H](C1)n2c3cc(c(cc3[nH+]c2CCCl)Cl)F	d0447
	C[C@H]1CC[C@@H]([C@@H]1C)n2c3cc(c(cc3[nH+]c2CCCl)Cl)F	d0448
	CC[C@H]1CC[C@@H]([C@@H]1C)n2c3cc(c(cc3[nH+]c2CCl)Cl)F	d0449
	Cc1cc(c([nH+]c1)N(C)[C@@H](C)C(C)(C)C)Br	d0450
Fc1cccc(c1)C1(CCCCC1)N1CCCCC1	c1cc[nH+]c(c1)S[C@H](C#N)c2ccc(cc2Cl)Cl	d0451
	Cc1cc(c2c(c3c(c(c(c(c3F)F)F)F)[nH+]c2c1)C)C	d0452
	c1cc[nH+]c(c1)CCSc2ccc(c(c2)Cl)Cl	d0453
	Cc1ccc(cc1)[S@@](=O)c2c3ccccc3cc[nH+]2	d0454
	Cc1cc2c3cc(ccc3sc2c([nH+]1)C)Cl	d0455
	c1ccc(cc1)/C=C\c2ccc3ccccc3[nH+]2	d0456
	c1ccc2c(c1)c3ccc4cc[nH+]cc4c3s2	d0457
	c1ccc(c(c1)Cn2c3ccccc3[nH+]c2C4CC4)Cl	d0458
	CC[NH+](CC)[C@]1(CCCC[C@H]1C(C)(C)C)C#N	d0459
	C[C@H]1CCCC[C@H]1n2c3cccc(c3[nH+]c2CCCl)F	d0460
	c1ccc(cc1)c2ccc(cc2)c3cn4ccccc4[nH+]3	d0461
	C[C@H](CC(C)C)[NH+](C)[C@@H]1CCCCC[C@@H]1C#N	d0462
	CCn1c(c[nH+]c1SC)c2ccc(c(c2)Cl)Cl	d0463
	CC[C@H]1CC[C@@H]([C@@H](C1)[NH+](C)CC(C)(C)C)C#N	d0464
	CCC(C)(C)[C@@H]1CC[C@H]([C@@H](C1)[NH+]2CCCSCC2)C#N	d0465
	C[C@H]1C[C@@H](C[NH+](C1)C[C@@H]2C[C@@H](CCC2=O)C(C)(C)C)C	d0466
	Cc1ccc2cccc(c2[nH+]1)c3ccc(s3)C(=O)C(C)C	d0467
	CCC(C)(C)[NH+](C)Cc1ccc(cc1F)Br	d0468
	C[C@H]1CC[C@@H]([C@@H](C1)C)n2c3cccc(c3[nH+]c2CCl)F	d0469
	C[C@@H]1C[C@H](C[NH+](C1)Cc2ccc(cc2)Br)C	d0470
	CC1CCC(CC1)[NH+](C)Cc2ccc(cc2)Br	d0471
	Cc1c(cccc1Cl)/[NH+]=C\c2ccc(cc2)N(C)C	d0472
	CN(C)c1ccc(cc1)/C=[NH+]/c2cccc3c2cccc3	d0473
	CCC[NH+]1CCC(=CC1)c2nc3c(cc(cc3s2)C)C	d0474
	CC(C)[C@H]1CCC[NH+](CC1)[C@@H]2CCC[C@@H]2C#N	d0475
	CC(C)[C@H]1CCC[NH+](CC1)CC(C)(C)CBr	d0476
	C[C@@H]1CCC[NH+](C1)C[C@@H](CBr)C(C)(C)C	d0477
	C[C@@H](CCCc1cc[nH+]c2c1cccc2)Br	d0478
	Cc1ccsc1[C@H]([C@H](C)c2cc[nH+]cc2)Br	d0479
	C[C@@H]1CC[C@@H]([C@@H]1C)n2c3cccc(c3[nH+]c2CCCl)F	d0480
	C[C@H]1CC[C@@H]([C@@H]1C)n2c3cccc(c3[nH+]c2CCCl)F	d0481
	C[C@@H]1CC[C@@H]([C@@H]1C)n2c3cc(ccc3[nH+]c2CCCl)F	d0482
	C[C@H]1CCC[NH+]([C@@H]1C)C[C@@H](CS)C(C)C	d0483
	C[C@H]1CC[NH+]([C@@H](C1)C)C[C@@H](CS)C(C)C	d0484
	C[C@H](C[NH+]1CCC[C@H](CC1)C(C)C)CS	d0485
	C[C@H](c1cc[nH+]cc1)[C@@H](C2C[C@H]3C[C@H]3C2)Br	d0486
	C[C@@H](c1cc[nH+]cc1)[C@H](C2C[C@H]3C[C@H]3C2)Br	d0487
	C[C@H](c1cc[nH+]cc1)[C@@H](c2c(ccs2)Cl)Cl	d0488
	C[C@H](Cc1ccc2ccccc2[nH+]1)C[C@H](C)Br	d0489
	Cc1ccc(cc1C)[C@H]([C@@H](C)c2cc[nH+]cc2)Cl	d0490
	c1cc(c(c(c1)Cl)Cl)[C@@H](Cc2cc[nH+]cc2)Cl	d0491
	Cc1ccccc1[C@@H](Cc2c(ccc[nH+]2)C)Cl	d0492
	Cc1ccccc1[C@H](Cc2c(ccc[nH+]2)C)Cl	d0493
	Cc1ccc[nH+]c1C[C@@H](c2ccc(cc2)Cl)Cl	d0494
	C[C@H](c1cccc[nH+]1)[C@@H](c2csc3c2cccc3)Cl	d0495
	c1ccc2c(c1)C=[NH+]c3cc(c(cc3O2)F)Br	d0496
	CCc1ccc([nH+]c1)C[C@@H]2CCCC[C@@H](C2)Br	d0497
	CC[C@@H]1CCCC[C@H]1[NH+]2C[C@@H]3CCCCN3C[C@@H]2CC	d0498
	CC(C)[C@H]1CN2CCCC[C@@H]2C[NH+]1C3CCC(CC3)(C)C	d0499
	CC/C(=[NH+]\[C@@H]1CCC[C@@H]([C@H]1C)/N=C(\C)/CC)/C	d0500
C1CCC(CC1)(N1CCCCC1)c1ccccc1	Cc1ccc(cc1)c2nc3c[nH+]c4ccccc4c3s2	d0501
	c1ccc2c(c1)ccc([nH+]2)/C=C/c3ccccc3Cl	d0502
	c1cc2c3c(ccc(c3c1)/C=C/c4cc[nH+]cc4)CC2	d0503
	c1ccc2c(c1)cc[nH+]c2/C=C/c3ccccc3Cl	d0504
	CN(C)c1c2ccccc2[nH+]c3c1sc4c3cccc4	d0505
	Cc1cc(c2c(c1)[nH+]c(c(c2Cl)C)C)C	d0506
	CC[C@@H]1CC[C@H]([C@@H](C1)[NH+](C)[C@@H](C)C(C)C)C#N	d0507
	CCC(C)(C)n1c2ccc(cc2[nH+]c1[C@H](C)Cl)F	d0508
	CC(C)(C)Cc1[nH+]c2ccccc2n1CC=C	d0509
	CCc1[nH+]c2cc(ccc2n1[C@H](C)CC)Cl	d0510
	CC(C)c1[nH+]c2ccc(cc2n1C(C)C)Cl	d0511
	C[C@@H]1CCCC[C@@H]1[NH+](C)[C@@H]2CCCC[C@@H]2C#N	d0512
	CC(C)(C)C[NH+](C)[C@@H]1CCCCC[C@@H]1C#N	d0513
	C[C@@H](C(C)C)[NH+](C)Cc1ccc(s1)Br	d0514
	c1ccc2c(c1)cccc2C[C@@H](c3cc[nH+]cc3)Cl	d0515
	Cc1ccc(cc1)[C@H]2C(=c3ccccc3=[NH+]2)C	d0516
	CN1CCC2=c3ccccc3=[NH+][C@@H]2[C@@H]1C4CCCCC4	d0517
	c1cc2=[NH+][C@H]3CCCCC3=c2cc1Br	d0518
	c1ccc-2c(c1)Cn3c2[nH+]cc3c4ccc(cc4)Cl	d0519
	c1cc(ccc1CCCc2cc[nH+]cc2)Cl	d0520
	c1cc(ccc1c2ccc3c[nH+]ccc3c2)C(F)(F)F	d0521
	CC[C@H]1CCC[C@H](C1)[NH+](CC#N)C2CCCC2	d0522
	CCC1CC[NH+](CC1)CC(C)(C)CBr	d0523
	CC1CC[NH+](CC1)C[C@H](CBr)C(C)C	d0524
	C[C@@H]1CCC[C@H]([NH+]1C[C@@H](CBr)C(C)C)C	d0525
	Cc1cc[nH+]cc1CC[C@H](C(C)(C)C)Br	d0526
	C[C@@H](c1cc[nH+]cc1)[C@@H](C(C)(C)C)Br	d0527
	C[C@H]([C@H](Cc1cc[nH+]cc1)Br)C(C)C	d0528
	CCC(C)(C)[C@@H](Cc1ccc(c[nH+]1)C)Br	d0529
	C[C@H]1CC[NH+]([C@@H](C1)C)C[C@@H](CS)C(C)(C)C	d0530
	C[C@H]1CCC[NH+](C1)C[C@@H](CS)C(C)C	d0531
	CC(C)(C[NH+]1CC[C@H]2CCCC[C@@H]2C1)CS	d0532
	CC(C)[C@H]1CCC[NH+](CC1)C/C=C/CS	d0533
	C[C@@H]1C[NH+](C[C@H]1C)C[C@@H](CS)C(C)(C)C	d0534
	C[C@@H](c1cc[nH+]cc1)[C@H](C2C[C@H]3C[C@H]3C2)Cl	d0535
	C[C@H](c1cc[nH+]cc1)[C@H](C2C[C@H]3C[C@H]3C2)Cl	d0536
	Cc1ccc2cc(ccc2[nH+]1)[C@@H](C)[C@H](C)Br	d0537
	C[C@@H](Cc1cc[nH+]c2c1cccc2)C[C@@H](C)Cl	d0538
	CC(C)C[C@H](Cc1ccc2ccccc2[nH+]1)Cl	d0539
	Cc1ccc(cc1)[C@H]([C@H](C)c2cc[nH+]cc2)Cl	d0540
	C[C@@H](c1cc[nH+]cc1)[C@H](c2ccccc2Cl)Cl	d0541
	C[C@H](c1cc[nH+]cc1)[C@H](c2c(cccc2F)F)Cl	d0542
	C[C@@H](c1cc[nH+]cc1)[C@@H](c2ccc(cc2)SC)Cl	d0543
	CC[C@@H]1CN2CCC[C@@H]2C[NH+]1C[C@@H](C)C(C)C	d0544
	CC[C@H]1CN2CCC[C@@H]2C[NH+]1C[C@@H](C)C(C)C	d0545
	CC(C)[C@H](C[NH+]1CC[C@@H]2CCCC[C@@H]2C1)CS	d0546
	CCc1cc(c([nH+]c1)C(C)(C)C)OC2CC2	d0547
	CSc1ccc(cc1)/C=[NH+]\c2ccc(cc2)Cl	d0548
	Cc1cc(c(o1)S)/C=[NH+]/c2ccc3ccccc3c2	d0549
	c1ccc2c(c1)cccc2/C=N\c3ccc(c[nH+]3)Cl	d0550
COc1cccc(c1)C1(CCCCC1)N1CCCC1	CCSc1c(c(cc[nH+]1)c2ccc(cc2)Cl)C#N	d0551
	C[NH+](C)C[C@@H]1CCCCCCCCCC(=C)C1=O	d0552
	Cc1cc(c2c(c1)c(cc([nH+]2)S[C@@H](C)C(=O)C)C)C	d0553
	C[C@H](c1[nH+]c2ccccc2n1c3ccc(cc3)F)Cl	d0554
	CCC[C@H]1CC[C@@H]([C@@H](C1)[NH+]2CCCC[C@@H]2C)C#N	d0555
	CCC(C)(C)[C@H]1CC[C@@H]([C@@H](C1)[NH+](C)C(C)C)C#N	d0556
	CC[C@@H]1CC[C@H]([C@@H](C1)[NH+](C)Cc2ccc(cc2)C)C#N	d0557
	CC[NH+]([C@@H]1C[C@@H](CC[C@@H]1C#N)C(C)(C)C)C(C)C	d0558
	CCCCn1c2cccc(c2[nH+]c1[C@@H](C)Cl)F	d0559
	CC(C)(C)[C@@H]1CC[C@H]([C@@H](C1)[NH+](C)CC(F)(F)F)C#N	d0560
	CCc1[nH+]c2ccccc2n1CCc3ccccc3	d0561
	CCC[C@H]1CC[C@H]([C@@H](C1)[NH+]2CCC[C@@H]2CC)C#N	d0562
	CCc1c([nH+]c2ccc(cc2c1Cl)N(C)C)C	d0563
	C[C@@H](c1[nH+]c2cc(ccc2n1CCC(C)C)F)Cl	d0564
	CC[C@H](C(C)C)n1c2cccc(c2[nH+]c1CCl)F	d0565
	CC[C@@H]1CC[C@H]([C@@H](C1)[NH+](C)[C@@H](C)C(C)(C)C)C#N	d0566
	CC[C@@H]1CC[C@H]([C@@H](C1)[NH+](C)C2CCC(CC2)C)C#N	d0567
	CC(C)(C)C1CC[NH+](CC1)[C@@H]2CCCC[C@@H]2C#N	d0568
	C[C@@H](c1[nH+]c2ccc(cc2n1CCC(C)C)F)Cl	d0569
	CC[C@@H](C(C)C)n1c2cc(ccc2[nH+]c1CCl)F	d0570
	CC(C)(C)Cn1c([nH+]c2c1c(c(cc2)F)F)CCl	d0571
	CC[C@@H]1CCC(=O)[C@@H](C1)C[NH+](C)[C@@H]2CCCC[C@@H]2C	d0572
	CCC[C@H]1CCC(=O)[C@@H](C1)C[NH+]2CC[C@@H](C[C@@H]2C)C	d0573
	CC[C@H](C)Cn1c2cc(ccc2[nH+]c1[C@@H](C)Cl)F	d0574
	CCC1CC[NH+](CC1)C[C@@H]2C[C@H](CCC2=O)C(C)C	d0575
	CCCn1c2cc(ccc2[nH+]c1SC)C(F)(F)F	d0576
	C[C@@H](c1cccc(c1)c2ccc3c(c2)cccn3)[NH+](C)C	d0577
	CC[C@H](c1ccc(cc1)Cl)Sc2[nH+]ccn2C	d0578
	CC(C)(C)[C@@H]1CCC[NH+](CC1)CC(=O)C(C)(C)C	d0579
	CCC[C@@H]1CCC[NH+](CC1)C[C@@H]2CCCCC2=O	d0580
	C[C@@H]1C[C@@H]([C@@H](C(=O)C1)C[NH+](C)CC2CCCCC2)C	d0581
	CCn1cc[nH+]c1C(C)(C)[C@@H]2CC[C@@H](C[C@@H]2Cl)C	d0582
	C[NH+](Cc1cnc(s1)Cl)CC2CCCCC2	d0583
	c1cc(ccc1COc2cc[nH+]c(c2)CCl)Cl	d0584
	CC(C)[C@H]1CCC(=O)[C@@H](C1)C[NH+]2CCC[C@@H]2C(C)C	d0585
	C[C@H](c1cc[nH+]cc1)[C@@H](c2coc3c2cccc3)Cl	d0586
	CC(C)[C@H]1CCC[NH+](CC1)CC(C)(C)C(=O)C	d0587
	Cc1ccc[nH+]c1C[C@H]([C@@H]2[C@@H]([C@@H](O[C@@H]2C)C)C)Cl	d0588
	CC[C@](C)(C(=O)c1cc(ccc1Cl)Cl)[NH+](C)C	d0589
	CCc1ccc(o1)[C@H](Cc2c(ccc[nH+]2)C)Cl	d0590
	CC[C@@H](C)[C@H](C)[NH+]1C[C@@H]2CCCCN2C[C@@H]1C(C)C	d0591
	CC[C@H]1CCCC[C@@H]1[NH+]2C[C@@H]3CCCCN3C[C@@H]2C	d0592
	CC(C)[C@@H]1CN2CCCC[C@@H]2C[NH+]1C3(CCCC3)C	d0593
	CCCC1CCC(CC1)[NH+]2C[C@H]3CCCN3C[C@@H]2CC	d0594
	C[C@H](CN1C[C@H]2CCC[NH+]2C[C@H]1C(C)C)C(C)C	d0595
	Cc1[nH+]c2ccccc2n1C[C@H](CS)C(C)(C)C	d0596
	CC1(CCC(CC1)[NH+](C)[C@H]2CCCC[C@@H]2C#N)C	d0597
	C[C@@H]1CC[C@H]([C@@H](C1)[NH+](C)C2CCC(CC2)(C)C)C#N	d0598
	C[C@H]1CN2CCC[C@@H]2C[NH+]1CC3(CCCC3)CC(C)C	d0599
	Cc1cc(c(nc1)[NH+](C)CC(C)(C)C)Br	d0600
COc1ccc(cc1)C1(CCCCC1)N1CCCCC1	c1cc(ccc1c2cn3cc(ccc3[nH+]2)Br)Cl	d0601
	CC[NH+](CCCl)Cc1csc2c1c(ccc2)Cl	d0602
	Cc1ccccc1c2[nH+]c3cc(ccc3n2C(C)C)Cl	d0603
	C[C@@H](C(C)C)[NH+](C)Cc1ccc(cc1F)Br	d0604
	C[C@@H](C(C)C)[NH+](C)Cc1ccc(cc1Br)F	d0605
	CC(C)C[NH+](Cc1cc(cs1)Br)C(C)C	d0606
	C1CC[C@H]([C@H](CC1)[NH+]2CCC[C@@H]2C3CCCC3)C#N	d0607
	C[C@@H]1C[C@H]1n2c3c(cccc3Cl)[nH+]c2[C@@H](C)Cl	d0608
	CCc1cc(c(s1)S)/C=[NH+]\c2ccc3ccccc3c2	d0609
	Cc1ccc2c(c1)[nH+]c(n2[C@@H]3CC[C@@H](C[C@@H]3C)C)[C@@H](C)Cl	d0610
	CC(C)(C)[C@@H]1CCC[NH+](CC1)CCCCBr	d0611
	C[C@H]1CCCC[C@H]1[NH+](C)Cc2cc(cs2)Br	d0612
	c1ccc2cc(ccc2c1)c3cn4cc(ccc4[nH+]3)Cl	d0613
	C[C@H](Cc1ccc(cc1)Cl)[NH+](C)CC(F)(F)F	d0614
	c1ccc(cc1)[C@@H](CCc2cc3ccccc3[nH+]c2)Cl	d0615
	CCC1CCC(CC1)[NH+](C)C[C@@H](C)CBr	d0616
	CC(C)(C[NH+](C)Cc1ccc(cc1)Cl)CBr	d0617
	CCC(CC)(C[NH+]1CC[C@H](C[C@@H]1C)C)CBr	d0618
	CCC[C@@H](C[NH+]1CCC[C@@H]([C@@H]1C)C)CBr	d0619
	C[C@H]1CCC[C@H](C1)[NH+](C)C[C@@H](CBr)C(C)C	d0620
	CC[C@@H]1CCC[NH+]1C[C@@H](CBr)C(C)(C)C	d0621
	CCC(CC)(C[NH+]1C[C@@H](CC[C@@H]1C)C)CBr	d0622
	CCCC[C@@H]([C@@H](C)c1cc[nH+]cc1)Br	d0623
	CC/C(=C\c1ccc2c(c1)ccc[nH+]2)/CBr	d0624
	C[C@H]1C[C@@H]1C[NH+](C)CC2(CCCCCC2)CBr	d0625
	CC(C)[C@@H]1CCC[NH+](CC1)CC2(CCC2)CBr	d0626
	C[C@@H]1CCC[C@@H](C1)[NH+](C)C[C@@H](CBr)C(C)(C)C	d0627
	CC[C@@H](C[NH+]1CCC(CC1)C(C)(C)C)CS	d0628
	CC[C@H](C[NH+]1CCC[C@@H]1C2CCCC2)CS	d0629
	CCC[C@@H]1CCC[NH+](CC1)CC(C)(C)CS	d0630
	CC[C@H](CCCc1cc[nH+]c2c1cccc2)Cl	d0631
	CC(C)[C@@H](CCCc1cc[nH+]c2c1cccc2)Br	d0632
	c1ccc(cc1)[C@H](CCCc2ccc3ccccc3[nH+]2)Cl	d0633
	C[C@H](C[C@H](Cc1ccc2ccccc2[nH+]1)Cl)C(C)(C)C	d0634
	C[C@H](c1cc[nH+]cc1)[C@@H](c2cc(cc(c2)Cl)Cl)Cl	d0635
	C[C@H](c1cc[nH+]cc1)[C@H](c2ccc(c(c2)Cl)Cl)Cl	d0636
	C[C@@H](c1cc[nH+]cc1)[C@H](c2c(cccc2Cl)Cl)Cl	d0637
	Cc1ccc([nH+]c1)C[C@@H](C2CCC(CC2)C(C)(C)C)Cl	d0638
	C[C@H]1C[C@@H](C[NH+](C1)Cc2cc(cc(c2)Br)F)C	d0639
	CC[NH+](Cc1cc(cc(c1)Br)F)CC(C)C	d0640
	C[C@H](C(C)C)[NH+](C)Cc1cc(cc(c1)Br)F	d0641
	C[C@@H]1CCCCC[C@H]1[NH+]2C[C@@H]3CCCCN3C[C@@H]2C	d0642
	CC(C)[C@H]1CN2CCC[C@@H]2C[NH+]1C3CCCCCCC3	d0643
	CC(C)(C)[C@H](C[NH+](C)C1CCCCCC1)CS	d0644
	CC(C)[C@H](C[NH+]1CCC[C@@H](C1)C(F)(F)F)CS	d0645
	CC(C)(C)[C@H](C[NH+]1CCC(CC1)C(F)(F)F)CS	d0646
	CC(C)[C@@H](C[NH+](C)C1CCC(CC1)(C)C)CBr	d0647
	CC(C)[C@@H](C[NH+](C)C1CCC(CC1)(C)C)CS	d0648
	C[C@@H](c1[nH+]c2cc(c(cc2n1C3CCC3)Cl)Cl)Cl	d0649
	Cc1ccc2cc(ccc2[nH+]1)/C=C(\CBr)/C(C)C	d0650
COc1cccc(c1)C1(CCCCC1)N1CCCCC1	C1CC[C@@H]([C@@H](CC1)[NH+]2CC[C@@H]3CCCC[C@@H]3C2)C#N	d0651
	C[C@@H]1CCCC[C@@H]1n2c3ccc(cc3[nH+]c2CCl)Cl	d0652
	C[NH+](C)c1c2ccc(cc2sc1c3ccccc3)Cl	d0653
	C[C@H](CC(C)C)[NH+](C)Cc1c(ccs1)Br	d0654
	CC(C)(C)C1CC[NH+](CC1)CCCCBr	d0655
	CC1CCC(CC1)n2c([nH+]c3c2c(c(cc3)F)F)CCl	d0656
	Cc1ccc(s1)C[NH+](Cc2ccc(cc2)F)C(C)C	d0657
	C1CC[C@H]2C[NH+](CC[C@@H]2C1)CCCCCBr	d0658
	C[C@@H]1CC[C@@H]([C@@H](C1)[NH+]2CCC[C@@H](CC2)C(C)C)C#N	d0659
	CCC[C@@H](CCc1cccc2c1cc[nH+]c2)Br	d0660
	CCC(CC)(C[NH+]1CCC[C@@H](C1)C)CBr	d0661
	CCC[C@H](C[NH+]1CCC[C@@H]([C@@H]1C)C)CBr	d0662
	C[C@H]1CC[C@@H]([NH+](C1)C[C@@H](CBr)C(C)(C)C)C	d0663
	C[C@H](C[C@H](Cc1cccc[nH+]1)Cl)C(C)(C)C	d0664
	Cc1ccc[nH+]c1C[C@H](c2c(ccs2)C)Cl	d0665
	C[C@@H](c1cc[nH+]cc1)[C@@H](CCC(C)C)Br	d0666
	C[C@@H]([C@@H](Cc1cc[nH+]cc1)Br)C(C)C	d0667
	Cc1ccc([nH+]c1)C[C@H]([C@H](C)C(C)C)Br	d0668
	CCC(CC)(C[NH+]1C[C@H]([C@@H](C1)C)C)CBr	d0669
	CC/C(=C\c1cc[nH+]c2c1cccc2)/CBr	d0670
	C[C@@H]1C[C@@H]1C[NH+](C)CC2(CCCCCC2)CBr	d0671
	CCC1CCC(CC1)[NH+](C)CC2(CCC2)CBr	d0672
	CCC[C@H](C[NH+]1CC[C@@H]2CCCC[C@@H]2C1)CBr	d0673
	CCc1ccc([nH+]c1)CC(C)(C)C[C@H](C)Br	d0674
	CCC(CC)(C[NH+]1[C@@H](CCC[C@@H]1C)C)CS	d0675
	C[C@@H](C(C)(C)C)[NH+](C)CC1(CCCC1)CS	d0676
	C[C@@H]1CCC[C@@H](C1)[NH+](C)C[C@@H](CS)C(C)C	d0677
	CC[C@@H](C[NH+]1CCC[C@@H]1C2CCCC2)CS	d0678
	CC[C@H](C)[NH+](CCBr)C1CCCCC1	d0679
	CC(C)(C)c1ccc(cc1)C[NH+](C)CCBr	d0680
	Cc1cccc(c1n2c3ccccc3[nH+]c2[C@@H](C)Cl)Cl	d0681
	CC(C)CC[C@@H](Cc1ccc2ccccc2[nH+]1)Cl	d0682
	C[C@@H](C[C@H](Cc1ccc2ccccc2[nH+]1)Cl)C(C)(C)C	d0683
	C[C@@H](c1cc[nH+]cc1)[C@@H](c2cc(cc(c2)Cl)Cl)Cl	d0684
	C[C@@H](c1cc[nH+]cc1)[C@H](c2cccc(c2Cl)Cl)Cl	d0685
	Cc1ccc(cc1)CC[C@H]([C@H](C)c2cc[nH+]cc2)Cl	d0686
	C[C@H](c1cc[nH+]cc1)[C@@H](c2cccc(c2)C(F)(F)F)Cl	d0687
	Cc1ccc[nH+]c1C[C@@H](CCC2CCCC2)Cl	d0688
	Cc1ccc[nH+]c1C[C@H](c2ccc(cc2)C(F)(F)F)Cl	d0689
	C[C@H](c1cccc[nH+]1)[C@H](c2csc3c2cccc3)Cl	d0690
	CCC(CC)[C@@H](Cc1ccc2ccccc2[nH+]1)Br	d0691
	CCC[NH+](Cc1cc(cc(c1)Br)F)C(C)C	d0692
	C[C@@H](C(C)C)[NH+](C)Cc1cc(cc(c1)Br)F	d0693
	CC(C)CC[NH+](C)Cc1cc(cc(c1)Br)F	d0694
	CCC(C)(C)[NH+](C)Cc1cc(cc(c1)Br)F	d0695
	C[C@@H]1CCCC[C@@H]1[NH+]2C[C@@H]3CCCCN3C[C@@H]2C(C)C	d0696
	CCc1ccsc1[C@@H](Cc2ccc(c[nH+]2)C)Cl	d0697
	CC(C)[C@@H](C[NH+]1CCC(CC1)C(F)(F)F)CS	d0698
	CC(C)(C)c1ccc(cc1)C[NH+](C)CC2CC(C2)Cl	d0699
	Cc1cc(c(nc1)[NH+]2C[C@@H](C[C@@H]([C@@H]2C)C)C)Br	d0700
CCCNC1(CCCCC1)c1cccc(c1)OC	C1CCC(CC1)[NH+](C[C@H]2CCCN2)C3CCCCC3	d0701
	CCN1CCC(CC1)[NH2+][C@@H]2C[C@@H](CC[C@@H]2C(C)C)C	d0702
	CCC(CC)[NH+](C)C[C@@H]1C[C@@H]2CCCC[C@@H]2N1	d0703
	Cc1ccc(cc1C)[C@H](C)[NH2+][C@H](C)c2ccc(o2)C	d0704
	C1CCC(CC1)[C@H]2CCCC[C@H]2[NH2+]C[C@@H]3CCOC3	d0705
	C[C@@H]1CC[C@@H]([C@@H](C1)OC[C@@H]2CCCC[NH2+]2)C(C)C	d0706
	C[C@H]1CC[C@H]([C@@H](C1)O[C@@H]2CCC[C@@H]2[NH2+]C)C(C)C	d0707
	C[C@@H]1CC[C@@H]([C@@H](C1)[NH2+]C[C@@H]2CCC=CO2)C(C)C	d0708
	C[C@H](c1ccc(o1)c2ccc(cc2)C(C)C)[NH2+]C	d0709
	CC(C)(C)C1CC[NH+](CC1)C[C@@H]2CCCC[C@@H]2NC	d0710
	C[NH2+][C@H]1CCCC[C@H]1CN(C)C2CCCCCC2	d0711
	CC(C)[C@@H]1CC[C@H]([C@@H](C1)C[NH+](C)C2CCCC2)O	d0712
	C1CC[C@H]([C@@H](CC1)[NH2+]CCC2CCCC2)C#N	d0713
	C[C@@H](c1ccc(cc1)Cl)N(C)C(=[NH2+])C2CCCC2	d0714
	CC(C)(C)[C@H]1CCCC[C@@H]1[NH+]2CCCC[C@@H]2CNC	d0715
	CCC[C@H]1C[C@H](CCO1)[NH2+][C@@H]2CCC[C@@H]([C@@H]2C)C	d0716
	CC[C@H]1CCCC[C@H]1[NH2+][C@@H]2CCO[C@@H](C2)C(C)C	d0717
	CC[C@@]1(C[C@@H](CCO1)[NH2+]C[C@@H]2CCCC[C@@H]2C)C	d0718
	CC[C@@H]1CCCC[C@H]1[NH2+]C2CCN(CC2)C(C)(C)C	d0719
	CC[C@]1(CSC(=[NH+]1)Nc2ccc(cc2)C(C)C)C	d0720
	C[C@@H](C[NH2+][C@H](C)c1ccc(cc1)C#N)C(C)C	d0721
	CC[C@@]1(CSC(=[NH+]1)NC[C@@H](C)C(C)C)C	d0722
	C[C@H]1CN([C@@H](C[NH2+]1)C2CCCCC2)CCC(C)C	d0723
	CC(C)[C@H]1C[NH2+][C@@H](CN1CC2CCCCC2)C(C)C	d0724
	CC[C@@]1(C[NH2+][C@@H](CN1CC2CCCC2)C(C)C)C	d0725
	CC[C@H]1C[NH2+][C@@H](CN1CC2CCCCC2)C(C)(C)C	d0726
	CC(C)(C)[C@@H]1CN([C@@H](C[NH2+]1)C2CCCCC2)CC=C	d0727
	CC(C)(C)[C@H]1CN([C@@H](C[NH2+]1)C2CCCCC2)CC=C	d0728
	CC[C@@H](C)C[NH+]1C[C@@H](NCC[C@@H]1C)C2CCCCC2	d0729
	CCC1(CN(CC[NH2+]1)C[C@@H]2CCCC[C@@H]2C)CC	d0730
	CC[C@H]1CCC[C@H](C1)N2C[C@@H]([NH2+]C[C@@H]2CC)C(C)C	d0731
	CC[C@@H](C)N1C[C@@H]([NH2+]C[C@@H]1C(C)C)C2CCCCC2	d0732
	CC[C@@H]1C[NH2+][C@@H](CN1C(C)(C)CC)C(C)(C)C	d0733
	CC[C@H]1C[NH2+][C@H](CN1[C@@H]2CCC[C@@H](C2)C)CC(C)C	d0734
	CC(C)[C@@H]1C[NH2+][C@H](CN1CC(C)(C)C)C(C)(C)C	d0735
	CCC[C@H]1CN([C@@H](C[NH2+]1)C)[C@@H]2CCCC[C@@H]2CC	d0736
	C[C@@H]1CCCC[C@H]1CN2C[C@@H]([NH2+]C[C@@H]2C)CC(C)C	d0737
	CC[C@@H]1C[NH2+][C@H](CN1C[C@@H]2CCCC[C@@H]2C)CC	d0738
	CC[C@H]1CCC[C@@H](C1)N2C[C@@H]([NH2+]C[C@@H]2CC)CC	d0739
	CC[C@H](C)[C@H]1C[NH+](CCCN1)C[C@@H]2CCCC[C@@H]2C	d0740
	CCC[C@H]1C[NH+](CCCN1)[C@@H](C)C2CCCCC2	d0741
	C[C@@H](C[NH+]1CCCN[C@@H](C1)C(C)(C)C)C(C)C	d0742
	CC[NH+]([C@H]1CCC[C@@H](CC1)C(C)C)[C@@H]2CCCNC2	d0743
	CC(C)C1CCC(CC1)[C@@H](c2cc(cnc2)F)[NH2+]C	d0744
	Cc1ccc(s1)C[C@@H](C)Nc2cc[nH+]cc2Cl	d0745
	CCC[C@@H]1CN([C@@H](C[NH2+]1)C(C)C)[C@@H]2CCCC2(C)C	d0746
	CCC(CC)N1CC([NH2+]CC1(CC)CC)(C)C	d0747
	C[C@H]1CC[C@@H]([C@@H](C1)[NH2+]CC2(COC2)C)C(C)C	d0748
	C[C@H]1C[C@H]([C@@H]([C@@H](C1)NC)[NH+](C)CC2CCCCC2)C	d0749
	Cc1c(scn1)C[NH2+][C@@H]2CCCC[C@@H]2C(C)C	d0750
CCNC1(CCCCC1)c1cccc(c1)OC	c1cc2c(cc[nH+]c2cc1Cl)NCC3CCC3	d0751
	Cc1c(scn1)[C@H](C)[NH2+][C@@H]2CCC[C@@H]([C@@H]2C)C	d0752
	C[C@@](C#N)(C1CCCCC1)[NH2+]C2CCCC2	d0753
	C[NH+](C[C@H]1C[C@@H]2CCCC[C@@H]2N1)CC3CC3	d0754
	CC(C)(C)[C@H]1CCCC[C@H]1[NH2+][C@@H]2CCCN(C2)C	d0755
	CCC1CCC(CC1)N[C@H]2C[C@H]([NH+](C[C@@H]2C)C)C	d0756
	CC[C@H]1CC[C@H]([C@@H](C1)[NH+](C)C2CCCCC2)O	d0757
	C[C@H]1CC[C@H]([C@@](C1)(C#N)[NH2+]CC=C)C(C)C	d0758
	CC(C)C1CCC(CC1)[NH2+]C[C@@H]2CCOC2	d0759
	c1cc(ccc1C[NH2+][C@@H]2CCCC[C@@H]2C#N)Cl	d0760
	C1CCC(CC1)C[NH2+][C@@H]2CCCC[C@@H]2C#N	d0761
	CC[C@H]1CCCC[C@H]1[NH2+][C@@H]2CCC[C@@H]2C#N	d0762
	CC[C@H]1CCCC[C@@H]1N2CC[C@@H]([NH2+]CC2)CC	d0763
	CC(C)C1CCC(CC1)[NH2+][C@@H]2CCC[C@H]2C#N	d0764
	CC1CCC(CC1)C[NH2+][C@H]2CCCCC[C@H]2C#N	d0765
	C[C@H](C1CCCCC1)[NH2+][C@H]2CCOC(C2)(C)C	d0766
	CC(C)[NH2+][C@H]1CCN(C1)C2CCCCCCC2	d0767
	CC(C)(C)[C@@H]1CCCC[C@H]1N(C)[C@@H]2CC[NH2+]C2	d0768
	CC(C)[C@@H]1CCC[NH+](CC1)C[C@@]2(CCCNC2)C	d0769
	C[C@@H]1Cc2c(sc([nH+]2)NCC(C)C)[C@H](C1)C	d0770
	C[C@H](c1ccccc1Nc2cccc[nH+]2)Cl	d0771
	CC(C)[C@H]1CCC[C@@](CC1)(C#N)[NH2+]C(C)C	d0772
	C1CCC(CC1)[C@H]2CN(CC[NH2+]2)CC3CCCC3	d0773
	CC(C)C[C@@H]1CN(C2(CCCC2)C[NH2+]1)C(C)C	d0774
	CC[C@@]1(C[NH2+][C@@H](CN1C(C)C)C2CCCCC2)C	d0775
	C[C@@H]1CCCC[C@@H]1C[NH2+][C@@H]2[C@@H]3CCO[C@@H]3C2(C)C	d0776
	CC(C)C1CCC(CC1)Nc2[nH+]ccs2	d0777
	CC[C@H]1CC[C@H]([C@@H]1C)[NH2+][C@@H]2[C@@H]3CCO[C@@H]3C2(C)C	d0778
	C[C@H](C(C)C)N1CC[NH2+][C@@H](C1)C2CCCCC2	d0779
	CC[C@H](C)[C@@H]1CN(CC[NH2+]1)C2CCCCCC2	d0780
	CC(C)C[C@H]1CN(CC[NH2+]1)c2ccc(cc2)Cl	d0781
	C[C@@H]1CC[C@H]([C@@H](C1)C)N2CC[NH2+][C@@H](C2)CC(C)C	d0782
	CC[C@H](C)[C@@H]1CN(CC[NH2+]1)C2CCC(CC2)(C)C	d0783
	CC[C@H]1CC[C@H]([C@@H]1C)N2CC[NH2+][C@@](C2)(C)CC	d0784
	CC[C@H]1CCC[C@@H](C1)N2C[C@@H]([NH2+]C[C@@H]2C)C(C)C	d0785
	C[C@@H]1C[C@H]1N2C[C@@H]([NH2+]C[C@@H]2C(C)C)C(C)(C)C	d0786
	CC(C)[C@@H]1C[NH2+]C(CN1CC2(CCCC2)C)(C)C	d0787
	CC[C@H]1C[NH2+][C@@H](CN1[C@@H]2CC[C@@H](C[C@@H]2C)C)CC	d0788
	C[C@H]1C[NH2+][C@](CN1[C@@H](C)C2CCCC2)(C)C3CC3	d0789
	CC[C@@]1(CN([C@@H](C[NH2+]1)C)[C@@H](C)C2CCCC2)C	d0790
	CC[C@@H]1C[NH2+][C@@H](CN1C2C[C@@H](C[C@@H](C2)C)C)CC	d0791
	CC[C@@H]1CCC[C@H](C1)N2C[C@@]([NH2+]C[C@@H]2C)(C)CC	d0792
	C[C@H]1CCC[C@@H](C1)CCNC2=[NH+]CCCC2	d0793
	CCC[C@H]1[C@@H]([NH2+]CC2(O1)CCC(CC2)C)CC	d0794
	C[C@@H]1CCCCC[C@@H]1N2CCC[C@@H](C2)[NH2+]C(C)C	d0795
	C[C@H]1CCC[C@H](C1)C[NH2+][C@@H]2CCC[C@@H]3[C@@H]2CCO3	d0796
	CC[C@@H]1CCCC[C@H]1N2CC[C@@H]([C@@H]([C@@H]2C)C)[NH2+]C	d0797
	CC[C@H](C)N1C[C@@H]([NH2+]CC12CCCC2)C(C)(C)C	d0798
	CCC1(CN([C@@H](C[NH2+]1)C)[C@@H]2CCCC2(C)C)CC	d0799
	C[C@@H](C1CCCC1)[NH2+][C@H]2CC(OC2(C)C)(C)C	d0800
CNC1(CCCCC1)c1cccc(c1)OC	CCc1ccc(cc1)NC2=[NH+]C[C@H](S2)C	d0801
	C[C@H]1CCCC[C@@H]1N[C@@H]2C[C@@H]([NH+](C[C@@H]2C)C)C	d0802
	CC[C@@H]1CCCC[C@@H]1N2CCCCC2=[NH2+]	d0803
	CCNc1c(c([nH+]c2c1ccc(c2C)C)C)C	d0804
	c1c[nH+]c([nH]1)C[C@H](C2CCCCCC2)Cl	d0805
	C[NH+](C[C@@H]1CCCCC[C@@H]1O)C2CCCC2	d0806
	CCC1CC[NH+](CC1)C[C@@H]2CCCC[C@H]2O	d0807
	CC(C)C1CCC(CC1)N[C@@H]2CC[NH+](C2)C	d0808
	C1CCCC(CC1)[NH2+][C@H]2CCCC[C@H]2C#N	d0809
	c1cc2c[nH+]ccc2c(c1)N[C@H]3C[C@@H]4[C@@H]3C=CC4	d0810
	CC(C)[C@H]1CCc2c(sc(n2)C[NH2+]C)C1	d0811
	C[C@H]1C[C@@H](CC(C1)(C)C)[NH2+][C@@H]2CCC[C@@H]2C#N	d0812
	C[C@H]1CC[C@H](C[NH2+]1)N2CCC(CC2)C(C)(C)C	d0813
	CCCC(=[NH2+])N1CC[C@H]2CCCC[C@@H]2C1	d0814
	CC1CCC(CC1)CCN2CCCCC2=[NH2+]	d0815
	CC(C)[C@@H]1CCC[NH+](CC1)C[C@@H]2CCCN2	d0816
	CC(C)C1CCC(CC1)[NH+](C)[C@H]2CCNC2	d0817
	CCN1C[C@H]([NH2+]C[C@@]1(C)C2CC2)C(C)(C)C	d0818
	CC[C@H]1CCc2c([nH+]c([nH]2)C(C)(C)C)C1	d0819
	C[C@@H]1CCN(CCC[NH2+]1)C[C@@H](C)C(C)C	d0820
	C[C@@H]1Cc2c(sc([nH+]2)NC(C)C)[C@@H](C1)C	d0821
	C[C@H]1CC[C@H](c2c1[nH+]c(s2)NC(C)C)C	d0822
	CC[C@@H](C)[NH2+][C@@]1(CC[C@@H](C[C@@H]1C)C)C#N	d0823
	CC(C)[C@@H]1CN([C@@H](C[NH2+]1)C(C)(C)C)C(C)C	d0824
	CC(C)(C)CN1CC[NH2+][C@H](C1)C(C)(C)C	d0825
	C[C@H]1CC[C@H]([C@@H]1C)Nc2ccc(c[nH+]2)Cl	d0826
	CC[C@@H](C1CCCCC1)N2CC[NH2+][C@@H](C2)C	d0827
	CC[C@@H]1C[NH2+][C@](CN1C(C)(C)C)(C)CC	d0828
	CC(C)(C)C[NH+]1CCCN[C@@H](C1)C(C)(C)C	d0829
	C[C@@H]1CCC[C@@H](CC1)[NH2+][C@@H]2CCC[C@@H]2C#N	d0830
	CC(C)C[C@@]1(C[NH2+]C[C@H](O1)C(C)(C)C)C	d0831
	CC1([C@@H]2C[NH2+]C[C@@H]2CN1CCC(C)(C)C)C	d0832
	C[C@H]1CC[C@H]([C@@H]1C)[NH2+][C@@H]2[C@@H]3CCO[C@@H]3C2(C)C	d0833
	CC[C@H]1C[NH2+][C@@H](CN1[C@@H]2CC[C@@H](C[C@@H]2C)C)C	d0834
	CC[C@@H]1C[C@]2(CC[NH2+]C[C@@H]2C(C)C)CCO1	d0835
	C[C@H]1CCCC[C@@H]1CN2CC([NH2+]C[C@@H]2C)(C)C	d0836
	CC[C@H]1CN([C@@H](C[NH2+]1)C)C2C[C@@H](C[C@@H](C2)C)C	d0837
	CC1(CCCC[C@@H]1[NH2+][C@@H]2CCC[C@@H]2C#N)C	d0838
	CCC[C@H]1CN(CC[NH2+]1)[C@@H]2CCCC2(C)C	d0839
	C1CCC(C1)[NH2+][C@H]2CCOC3(C2)CCCC3	d0840
	CC[C@H]1CCC[C@H](CC1)N2C[C@@H]([NH2+]C[C@@H]2C)C	d0841
	C[C@@H]1C[C@@H](CCO1)[NH2+][C@H](C)C2CCCCC2	d0842
	C[C@H](C1CCCCCC1)[NH2+]C2CCOCC2	d0843
	c1cc(c(cc1Cl)NC2=[NH+]CCC2)Cl	d0844
	C[C@@H]1C[NH2+][C@H](CN1[C@@H]2CCC=CC2)C(C)(C)C	d0845
	CC[C@H]1CCCC[C@H]1N2C[C@@H]3C[NH2+]C[C@@H]3[C@@H]2C	d0846
	CC[C@@H]1CCC[C@H](CC1)N2C[C@H]3C[NH2+]C[C@H]3C2	d0847
	CC[C@H]1[C@@H]2C[NH2+]C[C@@H]2CN1[C@@H]3CCC[C@@H](C3)C	d0848
	CC[C@H]1CC[C@@H](C1)N2C[C@@H]3C[NH2+]C[C@@H]3C2(C)C	d0849
	Cc1ccc(c([nH+]1)C)N[C@@H]2C[C@H](CC[C@@H]2C)C	d0850
CCNC1(CCCCC1)c1ccc2c(c1)OCO2	Cc1ccc([nH+]c1)NC(=O)c2ccc(cc2)C(C)C	d0851
	c1cc2c(ccc[nH+]2)c(c1)Nc3ccc(cc3)C#N	d0852
	CC(C)(C)c1ccc2c(c1)nc(o2)[C@@H]3CCC[NH2+]3	d0853
	CC(C)[NH2+]Cc1nc2cc(ccc2o1)C(C)(C)C	d0854
	CC(C)CN(C1CC1)C(=O)[C@@H]2C[C@H]3CCCC[C@@H]3[NH2+]2	d0855
	Cc1cc(ccc1Nc2[nH+]c(cc(n2)C)C)Cl	d0856
	Cc1ccc(o1)[C@H](C)Nc2ccc3ccccc3[nH+]2	d0857
	Cc1ccc(cc1)C2=C[C@H]([NH+]=N2)c3ccc(cc3O)C	d0858
	Cc1ccccc1c2[nH+]c3ccccc3n2C[C@@H](C)O	d0859
	CC(C)(C)c1[nH+]c2cc(ccc2n1CCCO)Cl	d0860
	CC(C)(C)c1[nH+]c2ccc(cc2n1CCCO)Cl	d0861
	C[C@@]12C[C@@H](CC(C1)(C)C)N(C2)C(=O)C[C@@H]3CCC[NH2+]3	d0862
	CCNc1cc([nH+]c(n1)Cc2ccc(cc2)Cl)C	d0863
	CCc1c([nH+]c(nc1NCC)c2ccc(cc2)F)C	d0864
	CCn1c2ccccc2[nH+]c1c3ccccc3O	d0865
	Cc1ccsc1c2[nH+]c(c(c(n2)NC)C(C)C)C	d0866
	CCc1c2ccccc2oc1c3csc([nH+]3)NC	d0867
	C[C@@H](Cc1ccc(o1)c2cccc3c2cccn3)[NH2+]C	d0868
	CCn1cc[nH+]c1[C@@]2(C[C@@H](CC[C@@H]2C(C)C)C)O	d0869
	CCn1cc[nH+]c1[C@]2(C[C@@H](CC[C@@H]2C(C)C)C)O	d0870
	Cc1ccc(c2c1[nH+]ccc2)N[C@@H]3CCO[C@@H](C3)C	d0871
	CC(C)[C@H]1CCCN(CC1)C(=O)C[NH2+]C(C)(C)C	d0872
	CC[C@@H]1CCC[C@@H](C1)OC(=O)[C@@H]2CCCCC[NH2+]2	d0873
	CCCc1cc(nc[nH+]1)N[C@@H]2CC[C@H]([C@@H](C2)C)C	d0874
	C[C@H]1CC[C@H]([C@@H](C1)Nc2ccc([nH+]c2)N(C)C)C	d0875
	CCn1cc(c[nH+]1)N[C@H]2CCC[C@H](C2)C(F)(F)F	d0876
	Cn1cc(c[nH+]1)N[C@@H]2CCCC[C@H]2C(F)(F)F	d0877
	c1cn(nc1C[C@@H]2CCCCC[NH2+]2)C3CCCCC3	d0878
	CC(C)(C)c1[nH+]c2c(n1C3CCCCC3)CCNC2	d0879
	CC[C@H]1C[NH2+][C@H](CN1C(=O)CC2CCCCC2)CC	d0880
	Cc1cc(nc([nH+]1)Nc2ccc(cc2)CCCl)C	d0881
	C[C@H]1CCC[C@H]1[NH2+]c2ccc3c(c2)CCN3C(=O)C	d0882
	Cc1ccc(cc1Cl)c2cnc(o2)C[NH2+]C(C)C	d0883
	Cc1ccc(cc1C)c2cnc(o2)C[NH2+]C(C)(C)C	d0884
	CCc1cc(nc([nH+]1)C2CCC(CC2)C(C)C)NC	d0885
	CC(C)[C@@H]1CCCN1C(=O)[C@@H]2C[C@@H]3CCCC[C@@H]3[NH2+]2	d0886
	CCc1ccc(cc1)N(C)C(=O)[C@H]2C[C@H]3CC[C@@H]2[NH2+]3	d0887
	CCc1cc(n([nH+]1)C)C[C@]2(C[C@@H](CC(C2)(C)C)C)O	d0888
	Cc1cccc2c1nc(s2)Nc3ccc[nH+]c3	d0889
	Cc1ccc(cc1)c2c(nco2)C[NH2+]C(C)(C)C	d0890
	CC(C)/C(=C/c1c(nc2n1cccc2)Cl)/C[NH2+]C	d0891
	c1cc(ccc1NC2=[NH+]CCCC2)N3CCCCC3	d0892
	c1cc(c(c(c1)F)C#N)Nc2ccc3c(c2)ccc[nH+]3	d0893
	Cc1c(cnn1C)C[NH2+][C@@H]2CCCC[C@H]2C(C)(C)C	d0894
	Cc1c(cnn1C)C[NH2+][C@H]2C[C@H](CC[C@@H]2C(C)C)C	d0895
	C[C@H](C[NH2+][C@H]1CCOC2(C1)CCOCC2)C(C)C	d0896
	CC(C)CN(C1CCCC1)C(=O)[C@@H]2C[C@H]3CC[C@@H]2[NH2+]3	d0897
	C[C@H]1C[C@@H](CC(C1)Nc2c3c([nH+]cn2)CCCC3)C	d0898
	CCc1cc(n(n1)C)[C@H]([C@H]2CC[C@@H]([C@@H](C2)C)C)[NH2+]C	d0899
	CCc1c(snn1)[C@H]([C@@H]2CCC[C@@H](C2)C)[NH2+]C	d0900
CCCNC1(CCCCC1)c1ccc2c(c1)OCO2	Cc1c(c(n([nH+]1)C)C)N[C@@H](C)c2ccc(cc2)C(C)C	d0901
	CC(C)c1[nH+]c2ccccc2c(n1)Nc3ccccc3	d0902
	CC(C)c1ccc(cc1)c2cnc(o2)[C@@H]3CCC[NH2+]3	d0903
	CN(C)c1cc[nH+]cc1N[C@H]2C[C@H]3C[C@@H]2[C@@H]4[C@@H]3CCC4	d0904
	C[C@H]1C[C@@H](CC(C1)(C)C)Nc2ccc([nH+]c2)N(C)C	d0905
	CCN(CC)c1ccc(c[nH+]1)N[C@@H]2CCCC[C@H]2C	d0906
	CC(C)(C)[C@@H]1CCCC[C@H]1[NH2+]C(C)(C)C(=O)OC	d0907
	C[C@@H]1CC[C@@H]([C@@H](C1)[NH2+]C(C)(C)C(=O)OC)C(C)C	d0908
	Cc1c(c(n([nH+]1)C(C)C)C)NC2[C@H](CCC[C@@H]2C)C	d0909
	C[C@H](CC(C)C)Nc1ccc([nH+]c1)N2CCCC2	d0910
	C[C@H](CC(C)C)N(C)C(=O)[C@H]1C[C@@H]2CCCC[C@@H]2[NH2+]1	d0911
	CCCc1cc(nc[nH+]1)N[C@H](C)c2cccc(c2)Cl	d0912
	CCc1ccc(cc1)[C@H](C)Nc2cc([nH+]cn2)C(C)C	d0913
	CCn1cc(cn1)[C@@H](C)[NH2+][C@H]2C[C@@H](CC[C@@H]2C(C)C)C	d0914
	CC(C)c1cc(nc([nH+]1)Cc2ccccc2Cl)NC	d0915
	C[C@H]1CC[C@@H]([C@@H](C1)Oc2c(cccn2)C[NH2+]C)C(C)C	d0916
	Cc1ccc(cc1)Cc2[nH+]c(cc(n2)NC)C(C)(C)C	d0917
	C[C@@H]1CCC[C@@H](C1Nc2ccc([nH+]c2)N3CCCC3)C	d0918
	CC(C)(C)C(=O)Nc1ccc[nH+]c1/C=C/c2ccccc2	d0919
	C[C@@H]1CC[C@@H]([C@@H](C1)C)Nc2ccc[nH+]c2N3CCCC3	d0920
	CCN(CC)c1ccc(c[nH+]1)N[C@@H]2CC[C@H](C[C@@H]2C)C	d0921
	C[C@H]1CC[C@@H]([C@@](C1)(Cc2ccn([nH+]2)C(C)C)O)C(C)C	d0922
	C[C@H]1CC[C@H]([C@@H](C1)[NH2+][C@@H](C)c2cnccn2)C(C)C	d0923
	Cc1cc(nc([nH+]1)C(C)C)NCC[C@@H]2CCC[C@H](C2)C	d0924
	CC[C@H]1CCCC[C@H]1Nc2ccc([nH+]c2)N(C)C	d0925
	CC[C@H](COC)Nc1cc[nH+]c2c1ccc(c2)Cl	d0926
	Cc1c(c(n([nH+]1)C(C)C)C)N[C@H]2CCCC(C2)(C)C	d0927
	C[C@@H]1CC[C@@H](C1)[NH2+]c2ccc(cc2)c3cnco3	d0928
	Cc1ccnc(n1)S[C@@H]2C[C@H](CC[C@@H]2[NH2+]C)C(C)C	d0929
	Cc1cnc(nc1)S[C@@H]2C[C@@H](CC[C@@H]2[NH2+]C)C(C)C	d0930
	Cc1c(c(n([nH+]1)C(C)C)C)N[C@H]2CC[C@@H]([C@@H](C2)C)C	d0931
	CCN(CC)c1ccc(c[nH+]1)N[C@H]2CCC[C@H]2C	d0932
	C[C@@H]1CCC[C@@H]1Nc2cccc(c2n3cc[nH+]c3)Cl	d0933
	Cc1c(c(n([nH+]1)C(C)C)C)N[C@H]2CCC[C@H](CC2)C	d0934
	CC[C@@H]1CCC[C@H](CC1)Nc2c[nH+]ccc2N(C)C	d0935
	C[C@@H](c1ncc(o1)c2ccc(cc2)C(C)(C)C)[NH2+]C	d0936
	CC[NH2+][C@H](C)c1ncc(o1)c2ccc(cc2)C(C)C	d0937
	Cc1c(cn(n1)C)[C@H](C)[NH2+][C@@H]2CCCC[C@@H]2C(C)(C)C	d0938
	CCc1cc(nc([nH+]1)C2CCC(CC2)C(C)(C)C)NC	d0939
	CCCc1c([nH+]cnc1NC)c2cc(c(cc2C)C)C	d0940
	CC(C)c1ccc(cc1)n2ccc(n2)C[NH2+]C(C)(C)C	d0941
	Cc1cc(n([nH+]1)C)C[C@]2(C[C@H](CC[C@@H]2C(C)C)C)O	d0942
	CC(C)(C)c1ccc2c(c1)nc(o2)C[C@@H]3CC[NH2+]C3	d0943
	C[C@@H]1CC[C@H]([C@@H](C1)[NH2+]Cc2cncn2C(C)C)C(C)C	d0944
	CC(C)(C)CCOC(=O)[C@@H]1CC[C@H]2CCCC[C@@H]2[NH2+]1	d0945
	CC(C)CCN(C1CCCC1)C(=O)[C@@H]2C[C@H]3CC[C@@H]2[NH2+]3	d0946
	Cc1cscc1c2[nH+]c(cc(n2)NC)C(C)(C)C	d0947
	Cc1c(c(on1)C2CC2)[NH2+][C@@H](C)CC3CCCC3	d0948
	CC[C@@H]1CCCC[C@H]1[C@@H](c2c(nns2)C)[NH2+]CC	d0949
	C[C@H]1CCC[C@H](C1)[C@@H](c2c(nns2)C(C)C)[NH2+]C	d0950
NC1(CC2CC1CC2)c1ccccc1	Cc1cc(c(c(c1C)CC[NH3+])C)C	d0951
	CC(C)(C)[C@H]1CCCC[C@H]1[NH3+]	d0952
	c1cc(c(cc1Cl)C[NH3+])Cl	d0953
	Cc1ccc(cc1)[C@@H](c2c(ccs2)C)[NH3+]	d0954
	Cc1cc(c2c(c1)c(c(s2)[C@@H](C)[NH3+])C)C	d0955
	CC(C)[C@](C)(C1CCCCC1)[NH3+]	d0956
	CC[C@@H](C)c1ccc(cc1)C#CC[NH3+]	d0957
	C[C@H]1C[C@@](CC(C1)(C)C)(C)[NH3+]	d0958
	c1cc(c(cc1Cl)Cl)C#CC[NH3+]	d0959
	CC#CC[C@H]([C@@H]1CCC[C@@H](C1)C)[NH3+]	d0960
	C[C@H]1CCC[C@@H](C1)[C@@H](C(C)(C)C)[NH3+]	d0961
	CCC(C)(C)C1CCC2(CC1)C[C@H]2[NH3+]	d0962
	C1CCC(CC1)[C@@H]2CCC[C@H]2[NH3+]	d0963
	C1CC[C@H]([C@H](CC1)[NH3+])C2CCCC2	d0964
	c1cc(c(cc1/C=C/C[NH3+])Cl)Cl	d0965
	C[C@@H]1CCC[C@H](C1)[C@@](C)(C(C)C)[NH3+]	d0966
	C[C@@H]1CCC[C@@H](C1)[C@@H]2CCC[C@@H]2[NH3+]	d0967
	C[C@@H]1CCC[C@H](C1)[C@@H]2CC[C@@H](C2)[NH3+]	d0968
	C[C@@H]1CC[C@@H]([C@@H](C1)CC2CCCCC2)[NH3+]	d0969
	C1CC[C@@H](C[C@@H](C1)CC2CCCC2)[NH3+]	d0970
	C1CC[C@@H]([C@H](CC1)SC2CCCC2)[NH3+]	d0971
	C[C@@H]1CC[C@@H]([C@@H](C1)CC(C)C)[NH3+]	d0972
	CC[C@](C)(c1ccsc1)[NH3+]	d0973
	C[C@@H]1CC[C@@H](C[C@@H]1C)[C@@H]2CCC[C@@H]2[NH3+]	d0974
	C[C@@H]1CC[C@H](C[C@@H]1C)[C@@H]2CC[C@@H](C2)[NH3+]	d0975
	C[C@@H]1[C@H](CC[C@@H]1SC2CCCCC2)[NH3+]	d0976
	Cc1cc(c(cc1C)[C@@H]2CC[C@@H]([C@@H]2C)[NH3+])C	d0977
	CCC1(CCC(CC1)(F)F)[NH3+]	d0978
	Cc1cc(cs1)[C@](C)(C(C)C)[NH3+]	d0979
	CC[C@H]1CCCC[C@H]1C2=C[C@@H](CC2)[NH3+]	d0980
	C[C@@H]1CC[C@@H](C[C@@H]1C)[C@@H]([C@@H]2C[C@@H]2C)[NH3+]	d0981
	C[C@H]1C[C@@H]1[C@H](C2CCC(CC2)C)[NH3+]	d0982
	CC[C@@](C)(c1ccc(s1)C)[NH3+]	d0983
	CC1CCC(CC1)[C@H](C(F)(F)F)[NH3+]	d0984
	C[C@H]([C@@H]1CCC[C@@H](CC1)C(C)(C)C)[NH3+]	d0985
	C[C@H]1CCC[C@H](C1)[C@@H](C(=C)C)[NH3+]	d0986
	CC[C@H](C)[C@@]1(C[C@@H](CC[C@@H]1C)C)[NH3+]	d0987
	CC(C)S[C@@H]1CCCC([C@@H]1[NH3+])(C)C	d0988
	C[C@H]1CCC/C(=C/2\CCC[C@H](C2)[NH3+])/C1	d0989
	CC[C@@H]1CC[C@@](C1)(C(F)F)[NH3+]	d0990
	CC[C@@H]([C@@H]1CCC(C1)(C)C)[NH3+]	d0991
	C[C@H]1C[C@@H](CC(C1)C[C@@H](C)[NH3+])C	d0992
	c1cc(sc1C[C@@H]2CC[C@@H]2[NH3+])Cl	d0993
	c1cc(ccc1[C@H]2CC[C@@H]2[NH3+])C(F)(F)F	d0994
	C[C@H]1CC[C@@H]([C@@H](C1)C2CCC(CC2)C)[NH3+]	d0995
	CC(C)[C@H]1CCCC[C@@H]1C[NH3+]	d0996
	C1CCC(CC1)[C@@H]2CC[C@@H]2C[NH3+]	d0997
	C[C@@H]1CC[C@H](C[C@@H]1C)[C@@H]2CC[C@@H]2C[NH3+]	d0998
	CC[C@H]1CC[C@@H]([C@@H](C1)C)C[NH3+]	d0999
	CC(C)[C@H]1CC(CC[C@@H]1C[NH3+])(C)C	d1000
C1CCN(C1)C1(CC2CC1CC2)c1ccc2c(c1)OCO2	c1ccn2cc([nH+]c2c1)CSc3cccc4c3nccc4	d1001
	Cc1ccc2[nH+]cc(n2c1)C(=O)c3ccc(cc3)Cl	d1002
	CC(C)(C)[NH+]1Cc2cc(c3cccnc3c2OC1)Cl	d1003
	c1ccc(cc1)c2c3ccccn3c([nH+]2)c4ccncc4	d1004
	c1ccc(cc1)[C@@H](C#N)c2cn3cc(ccc3[nH+]2)Cl	d1005
	c1ccc(cc1)c2c3ccccn3c([nH+]2)c4cccnc4	d1006
	C1CC[C@H]2C[NH+](CC[C@@H]2C1)Cc3c(snn3)Cl	d1007
	CC(C)[NH+]1CCN(CC1)[C@H]2C[C@@H](CC[C@@H]2C#N)C(C)(C)C	d1008
	CC(C)(C)[C@@H]1CC[C@@H]([C@@H](C1)[NH+](C)C2CCOCC2)C#N	d1009
	C[C@@H](c1ccco1)n2c3cccc(c3[nH+]c2[C@@H](C)Cl)F	d1010
	C[C@@H](c1ccco1)n2c3cccc(c3[nH+]c2[C@H](C)Cl)F	d1011
	CCc1cccc2=C(C[NH+]=c12)/C=C\3/c4ccccc4N(C3=O)C	d1012
	c1cc(cc(c1)[C@@H]2C=CN=[NH+]2)c3ccc(nc3)C(F)(F)F	d1013
	Cc1ccccc1c2[nH+]c3ccccc3n2[C@H](C)C(=O)C	d1014
	Cn1c2ccc(cc2[nH+]c1S[C@@H]3CCCCC3=O)Cl	d1015
	c1cc([nH+]nc1CCl)N2CCC[C@@H]2C3CCCC3	d1016
	C[C@@H]1CCCN(C1)C(=O)C[NH+]2CCC[C@@H]2C3CCCCC3	d1017
	c1cc([nH+]c(c1)F)N2CCO[C@H](C2)c3ccc(cc3)Cl	d1018
	c1cc(ccc1CC#N)n2c3ccc(cc3[nH+]c2CCl)F	d1019
	C1CC[C@H]([C@@H](CC1)N2CC[NH+](CC2)C3CCCC3)C#N	d1020
	c1ccc(cc1)c2[nH+]ccn2Cc3ccnc(c3)Cl	d1021
	CC(C)[C@H]1CCC(=O)[C@H](C1)C[NH+]2CCOC(C2)(C)C	d1022
	C[C@H]1C[NH+](CC(O1)(C)C)C[C@@H]2C[C@@H](CCC2=O)C(C)C	d1023
	c1ccc2c(c1)[nH+]cn2Cc3ccc(c4c3nccc4)F	d1024
	CC(=O)c1ccc(c(c1)Cl)n2c[nH+]c3c2cccc3	d1025
	CCN(CC)C(=O)[C@H]1CCCC2=c3cc(ccc3=[NH+][C@@H]12)Cl	d1026
	CC(C)n1c2ccc(cc2[nH+]c1Cc3ccsc3)C#N	d1027
	CCc1c(ncnc1Cl)c2c[nH+]cc3c2cccc3	d1028
	C[C@H]1CC[C@H]([NH+](C1)c2c(n3ccsc3n2)CCl)C	d1029
	CC(C)(C)[C@@H]1CC[C@@H]([C@@H](C1)N2CCC[C@@H](C2)[NH+](C)C)C#N	d1030
	Cc1ccccc1[C@H](C)n2c3cc[nH+]cc3nc2[C@H](C)Cl	d1031
	C[C@@H]1CC[C@H]([C@@H](C1)C)n2c3cc[nH+]cc3nc2[C@@H](C)Cl	d1032
	C[C@H]1CC[C@H]([C@@H](C1)C)n2c3cc[nH+]cc3nc2[C@@H](C)Cl	d1033
	C[C@H]1CCC[C@@H]([C@@H]1C)n2c3c(cccn3)[nH+]c2[C@@H](C)Cl	d1034
	c1cc2c(ccs2)cc1n3c4cc[nH+]cc4nc3CCl	d1035
	CCC1CCC(CC1)n2c([nH+]c3c2nccc3C)CCl	d1036
	Cc1ccnc2c1[nH+]c(n2[C@@H]3CCCC[C@@H]3C)CCCl	d1037
	Cc1ccnc2c1[nH+]c(n2C3CCC(CC3)C)CCCl	d1038
	Cc1ccnc2c1[nH+]c(n2[C@@H]3CCC[C@H](C3)C)CCCl	d1039
	CC(C)c1c(c(n(n1)C)Cl)C[NH+]2CCC(C2)(C)C	d1040
	Cc1ccc(cc1)c2ncc(s2)C[NH+]3CCO[C@@H]([C@@H]3C)C	d1041
	Cn1c2ccccc2[nH+]c1CC(=O)c3cccc(c3)Cl	d1042
	Cn1c2ccccc2[nH+]c1CC(=O)c3cccc(c3F)Cl	d1043
	Cc1cscc1c2[nH+]c3cc(ccc3n2C4CC4)C#N	d1044
	CC1([C@@H](C(=O)C(O1)(C)C)C[NH+]2CCC[C@@H]2C3CCCC3)C	d1045
	CC(C)[C@@H]1CCC(=O)[C@H](C1)C[NH+]2CCN3CCCC[C@@H]3C2	d1046
	Cc1ccc2c(c1)n(c([nH+]2)CCl)Cc3c(ncs3)C	d1047
	c1[nH+]c2c(c(n1)N3CCC[C@H](C3)CCCl)CCCCC2	d1048
	Cc1cc(nc([nH+]1)N(C)Cc2ccc(s2)Cl)C	d1049
	Cc1ccc2cc(ccc2[nH+]1)c3nc4c(c(n3)Cl)CCC4	d1050
COc1cc(ccc1OC)C1(CCCCC1)N1CCCCC1	C#CCSc1[nH+]c2ccccc2n1C(=O)C=Cc3ccccc3	d1051
	c1cc2c(ccc(c2[nH+]c1)OC(=O)c3ccc(cc3)F)Cl	d1052
	CCSc1c(c(cc(n1)c2ccccc2)c3ccc[nH+]c3)C#N	d1053
	CCOC(=O)c1cc2cc3cc(cc(c3[nH+]c2s1)C)C	d1054
	Cc1cc(c(c(c1)C)CSc2nc3c(o2)ccc[nH+]3)C	d1055
	c1ccc(cc1)C(=O)N(Cc2ccc(cc2)Cl)c3cccc[nH+]3	d1056
	Cc1cc(c2c(c1)c(cc([nH+]2)SCC(=O)c3ccco3)C)C	d1057
	CCN(Cc1ccccc1)c2c(n3ccccc3[nH+]2)CCl	d1058
	C[C@H](c1ccco1)n2c3c(cccc3Cl)[nH+]c2[C@H](C)Cl	d1059
	CC[NH+](Cc1nc2c(c(c(s2)C)C)c(n1)Cl)CC(C)C	d1060
	CC[C@H](C)[NH+](CC)Cc1nc2c(c(c(s2)C)C)c(n1)Cl	d1061
	Cn1c2ccccc2[nH+]c1CSc3nc4ccccc4s3	d1062
	CCc1ccc2c(c1)c(cc(n2)c3cc[nH+]cc3)C(=O)Cl	d1063
	CCC(CC)c1nn2c(c([nH+]c2s1)c3ccc(cc3)C)C	d1064
	CCCSc1nn2c(c([nH+]c2s1)c3ccc(cc3)C)C	d1065
	C[C@@H](c1[nH+]c2cc(ccc2n1C[C@@H]3CCCCO3)Cl)Cl	d1066
	CCC(C)(C)[C@H]1CC[C@H]([C@@H](C1)[NH+](C)Cc2cscn2)C#N	d1067
	C[C@@H](Cc1ccco1)n2c3ccc(cc3[nH+]c2[C@H](C)Cl)Cl	d1068
	C[C@@H](Cc1ccco1)n2c3ccc(cc3[nH+]c2[C@H](C)Cl)F	d1069
	C[C@@H](c1[nH+]c2cccc(c2n1CCc3ccco3)Cl)Cl	d1070
	c1cc2c(c(c1)Cl)n(c([nH+]2)CCCl)CCc3ccco3	d1071
	Cc1ccc2c(c1)[nH+]c(n2[C@H](C)c3ccc(o3)C)CCCl	d1072
	Cc1ccc(o1)[C@@H](C)n2c3ccc(cc3[nH+]c2[C@@H](C)Cl)F	d1073
	Cc1ccc(o1)[C@@H](C)n2c3cccc(c3[nH+]c2[C@@H](C)Cl)F	d1074
	Cc1ccc(o1)[C@H](C)n2c3cccc(c3[nH+]c2[C@@H](C)Cl)F	d1075
	Cc1ccc(o1)[C@@H](C)n2c3cc(ccc3[nH+]c2[C@@H](C)Cl)F	d1076
	Cc1ccc(o1)[C@H](C)n2c3cc(ccc3[nH+]c2[C@@H](C)Cl)F	d1077
	CCC[C@@H]1CC[C@H]([C@@H](C1)N2CC[NH+](CC2)CC(C)C)C#N	d1078
	c1cc(ccc1/[NH+]=C/c2ccc(o2)N3CCCC3)Br	d1079
	C[C@H](c1ccccc1Cl)OC(=O)CC2=c3ccccc3=[NH+]C2	d1080
	CCC[NH+]1CCC(CC1)CC(=O)N2CC3C[C@H]4C[C@@H](C3)CC2C4	d1081
	CCc1cc2c(cc1Cl)c(cc(=O)o2)C[NH+](C)[C@@H](C)CC	d1082
	Cc1cccnc1Cn2c3ccc(cc3[nH+]c2CCCl)Cl	d1083
	Cc1ccc(cc1)c2ccsc2C(=O)N(C)c3cccc[nH+]3	d1084
	Cc1ccc(s1)C[NH+](C)CN2c3cccc4c3c(ccc4)C2=O	d1085
	CCC[NH+]1CCC(CC1)N(C)C(=O)[C@H]2[C@@H](C2(C)C)C=C(C)C	d1086
	CCn1c2ccc(cc2[nH+]c1Cc3ccc(cc3)Cl)C#N	d1087
	c1ccc(cc1)c2c(nc(nc2Cl)Cc3cc[nH+]cc3)Cl	d1088
	CC(C)c1ccc(cc1)[C@@H]2CCCN2C(=O)CCc3cc[nH+]cc3	d1089
	C[C@@H](c1ncc(o1)c2ccc(cc2)Cl)[NH+]3CCCSCC3	d1090
	C[C@H](c1nc2c[nH+]ccc2n1c3ccc(cc3)C(C)C)Cl	d1091
	CC[C@@H]1CC[C@@H]([C@@H]1C)n2c3c(c(ccn3)C)[nH+]c2[C@@H](C)Cl	d1092
	CC[C@@H]1CC[C@H]([C@@H]1C)n2c3c(c(ccn3)C)[nH+]c2[C@@H](C)Cl	d1093
	CC[C@@H]1CC[C@@H]([C@@H]1C)n2c3c(cc(cn3)C)[nH+]c2[C@@H](C)Cl	d1094
	Cc1cc2c(nc1)n(c([nH+]2)CCCl)[C@@H]3CCC[C@@H]([C@@H]3C)C	d1095
	Cc1cc2c(nc1)n(c([nH+]2)CCCl)[C@H]3CC[C@@H](C[C@@H]3C)C	d1096
	Cc1cc2cc(oc2cc1C)C[NH+](C3CCOCC3)C(C)C	d1097
	Cc1ccc2c(c1)n(c([nH+]2)[C@@H](C)Cl)[C@@H](C)c3ccc(o3)C	d1098
	Cc1ccc2c(c1)n(c([nH+]2)[C@H](C)Cl)[C@H](C)c3ccc(o3)C	d1099
	Cc1cc(c(c(c1)C)/C=[NH+]\c2ccc(cc2)N3CCOCC3)C	d1100
C[C@@]12c3ccccc3C[C@@H]([NH2+]1)c4c2cccc4	c1cc(ccc1C2CC[NH2+]CC2)Cl	d1101
	c1cc(ccc1[C@@H]2[NH2+]CCS2)Br	d1102
	CC1(C=C(C([NH2+]1)(C)C)CBr)C	d1103
	C[C@@]12CC[C@@H](C1(C)C)C[C@H]2[NH2+]C3CC3	d1104
	Cc1cc2c(cc1C)S[C@H]([C@@H]2[NH2+]C)C	d1105
	C1CC[C@@H]2[C@H](C1)[NH2+][C@H]3CCCC[C@H]3S2	d1106
	c1cc(c(c(c1)Cl)[C@@H]2[NH2+]CCS2)Cl	d1107
	C[NH2+][C@H]1CCCC[C@H]1C2CCCCC2	d1108
	C[C@@H]1C[C@]2(CCC[NH2+]C2)CC(C1)(C)C	d1109
	C[C@H]1CCC[C@@H](C1)C[C@@H]2CCC[NH2+]C2	d1110
	C[C@H]1CCC[C@H](C1)[C@@H]2CCC[C@@H]2[NH2+]C	d1111
	Cc1c(c(c(c(c1F)F)[C@@H]2CCC[NH2+]2)F)F	d1112
	C[C@@H]1CCC[C@H]([C@@H]1C)[NH2+]C(C)(C)C#C	d1113
	C[C@H]1C[C@H]1[NH2+][C@@H]2CCCC(CC2)(C)C	d1114
	CC1(CCC[C@H](CC1)[C@H]2CC[NH2+]C2)C	d1115
	CC[C@H]1CC[C@@H]2[C@@H](C1)SC[C@@H]([NH2+]2)C	d1116
	CC(C)(C)[C@@H]1CC[C@@H]2[C@@H](C1)SCCC[NH2+]2	d1117
	C1CCC[C@@H]2[C@H](CC1)[NH2+]CCCS2	d1118
	C[C@H]1CCS[C@H]2[C@@H](C[C@@H](C[C@@H]2[NH2+]1)C)C	d1119
	C[C@@H]1CCS[C@H]2C[C@@H](CC[C@@H]2[NH2+]1)C(C)C	d1120
	Cc1ccc(cc1)[C@H]2[NH2+][C@@H](CCS2)C	d1121
	C[C@@H]1CCS[C@@H]([NH2+]1)C2CCCCC2	d1122
	C[C@@H]1C[NH2+][C@@H](S1)c2cc(cc(c2)Cl)Cl	d1123
	Cc1ccc(cc1)[C@@H]2[NH2+]C[C@@H](CS2)C	d1124
	C[C@H]1C[NH2+][C@H]2CCCCC[C@@H]2SC1	d1125
	C[C@H]1C[NH2+][C@@H]2CC[C@@H](C[C@@H]2SC1)C(C)(C)C	d1126
	C[C@@H]1C[NH2+][C@H]2CC[C@@H](C[C@@H]2SC1)C(C)(C)C	d1127
	C[C@@H]1CC[NH2+][C@H]2CCCCC[C@@H]2S1	d1128
	CC[C@H]1CS[C@H]2CC(CC[C@@H]2[NH2+]1)(C)C	d1129
	C[C@@H]1C[C@H]([C@@H]2[C@@H](C1)[NH2+]C(CS2)(C)C)C	d1130
	C[C@@H]1C[NH2+]CC[C@]12CCC[C@@H](C2)C3CC3	d1131
	C[C@@H]1[C@@H](Sc2c(ccc(c2[C@@H]1[NH2+]C)F)F)C	d1132
	C[C@H]1C[C@H]([C@@H]([NH2+]1)C)c2cc(cs2)Cl	d1133
	C[C@H]1CS[C@H]([NH2+]1)c2cc(cs2)Cl	d1134
	C[C@@H]1C[NH2+][C@@H](SC1)c2cc(cs2)Cl	d1135
	CC[C@@H]1CCCCC1=C2CC[NH2+]CC2	d1136
	c1cc(c(cc1/C=C/2\CCC[NH2+]C2)Cl)Cl	d1137
	c1cc(c(cc1Cl)C=C2C[NH2+]C2)Cl	d1138
	CC(C)[C@H]1C[NH2+]CC[C@@]12CSCCC2(C)C	d1139
	CC[C@@H](C)[C@H]1CS[C@@H](CC[NH2+]1)C	d1140
	C[C@H]1CC[C@@]2(C[C@@H]1C)[NH2+][C@@H](CS2)C	d1141
	C[C@H]1CCS[C@]2([NH2+]1)CCCC2(C)C	d1142
	C[C@@H]1CC[C@@H]([C@@]2(C1)[NH2+]C[C@@H](CS2)C)C	d1143
	C[C@H]1C[NH2+][C@]2(CCCC2(C)C)SC1	d1144
	C[C@H]1C[NH2+][C@@]2(CCCC(CC2)(C)C)SC1	d1145
	C[C@H]1CCCC[C@]12[NH2+]CC[C@@H](S2)C	d1146
	CC[C@@H]1CS[C@@]2([NH2+]1)CC[C@@H](C[C@@H]2C)C	d1147
	C[C@H]1CC[C@@]2(C[C@@H]1C)[NH2+]C(CS2)(C)C	d1148
	C[C@H]1CC[C@@]2([C@@H](C1)C)[NH2+]C(CS2)(C)C	d1149
	CC1(CC[C@H](C1)[NH2+][C@@H]2CCC=CC2)C	d1150
C[C@@]12c3ccccc3C[C@@H](N1)c4c2cccc4	c1cc2c(c[nH]c2c(c1)Cl)Br	d1151
	C[NH+](C)C12C[C@H]3C[C@@H](C1)CC(C3)(C2)[S-]	d1152
	Cc1ccc2cc(c([nH+]c2c1C)[S-])C	d1153
	CCc1cc2cc(c(cc2[nH]c1=S)C)C	d1154
	C[C@H](C#Cc1ccc(cc1Cl)Cl)O	d1155
	C[C@@H](C#Cc1ccc(cc1Cl)Cl)O	d1156
	C[C@H]1[C@H](CCC2=CC[C@H](C[C@]12C)C(=C)C)O	d1157
	Cc1cc(=S)[nH]c2c1cccc2C(C)C	d1158
	C1CC[C@@H]2C[C@]3(CC[C@@H]2C1)NCCS3	d1159
	CC[C@@H]1Cc2cc(cc(c2CN1)Cl)Cl	d1160
	c1cc(c2c(c1Cl)CCCC[C@@H]2O)Cl	d1161
	Cc1cc(c2c(c1)[C@H](C[C@@H](CC2)C)O)C	d1162
	C[C@H]1CC[C@@]2([C@@H]3[C@H]1C[C@H](C2(C)C)CC3)O	d1163
	c1c(cc(c(c1[C@H]2CCCN2)Cl)F)Cl	d1164
	c1c(c(c2c(c1Cl)CCC2)F)[C@@H]3CCCN3	d1165
	c1cc(c(c(c1O)Cl)F)Br	d1166
	C[C@H]1CN[C@@H](c2c1ccc(c2)C(C)C)C	d1167
	C[C@H]1[C@H](CC[C@@H]1O)c2cccc(c2)Cl	d1168
	Cc1cc(c(cc1C)[C@H]2CC[C@H]([C@@H]2C)O)C	d1169
	C[C@H]1CN[C@H](S1)c2ccc(s2)Cl	d1170
	Cc1cc(cc(c1)[C@@H]2N[C@H](CS2)C)C	d1171
	C[C@H]1CN[C@H]2CC[C@@H](C[C@@H]2S1)C(C)(C)C	d1172
	Cc1ccc(cc1C)[C@@H]2CS[C@H](CN2)C	d1173
	C[C@@H]1CS[C@@H]2C[C@@H](CC[C@@H]2N1)C(C)(C)C	d1174
	C[C@@H]1CCS[C@H]([C@@H](N1)c2ccc(cc2)F)C	d1175
	C[C@@H]1CCN[C@@H](S1)c2ccc(s2)Cl	d1176
	Cc1ccc(cc1C)[C@H]2CSC[C@@H](CN2)C	d1177
	C[C@@H]1CN[C@H](SC1)c2cc(cs2)Cl	d1178
	C[C@H]1CCN[C@H](S1)c2cc(cs2)Cl	d1179
	C[C@H]1Cc2c(cc(cc2Cl)Cl)[C@H]1NC	d1180
	C[C@H]1[C@@](CCCS1)(C2CCCCC2)O	d1181
	c1cc(c(cc1C2CC(C2)O)Cl)Cl	d1182
	C[C@@H]1C[C@]2(CC(C1)(C)C)NC[C@@H](S2)C	d1183
	C[C@@H]1C[C@@]2(CC(C1)(C)C)NCCCS2	d1184
	C[C@H]1CCS[C@@]2(N1)CCC[C@@H](C2)C3CC3	d1185
	C[C@H]1CCS[C@]2(N1)CCCC(C2)(C)C	d1186
	C[C@H]1CCS[C@@]2(N1)CCCC(CC2)(C)C	d1187
	C[C@@H]1CCC[C@@]2(CC1)NC[C@@H](CS2)C	d1188
	C[C@@H]1CCC[C@@]2([C@@H]1C)NC[C@@H](CS2)C	d1189
	C[C@H]1CC[C@]2(C[C@@H]1C)NCC[C@@H](S2)C	d1190
	C[C@@H]1CCN[C@]2(S1)CCCC(CC2)(C)C	d1191
	CC[C@@H]1CSC2(N1)C[C@@H](C[C@@H](C2)C)C	d1192
	CC[C@@H]1CS[C@]2(N1)CCC[C@@H]([C@@H]2C)C	d1193
	C[C@H]1CC[C@@]2(C[C@@H]1C)NC(CS2)(C)C	d1194
	CC1(CC[C@](C1)(c2ccc(s2)Cl)O)C	d1195
	C[C@@H]1Cc2c(c3cc(cc(c3[nH]2)F)F)[C@@H](C1)C	d1196
	C[C@H]1CCS[C@]2(N1)CCC(C[C@@H]2C)(C)C	d1197
	C[C@@H]1CCN[C@@]2(S1)CCC(C[C@@H]2C)(C)C	d1198
	Cc1cc(c(cc1Br)Cl)O	d1199
	C[C@@H]1CC[C@H]([C@H]2[C@]1([C@@H]3[C@@H](C3(C)C)CC2)C)O	d1200
Cc1cccc(c1)C2(CCCCC2)[NH2+]C	CCC(C)(C)[NH2+][C@H]1CCC[C@@H](C1)C	d1201
	C1CCC(CC1)C[NH2+]C2CCCCC2	d1202
	CC(C)[NH2+][C@H]1CCCC[C@H]1C(C)(C)C	d1203
	C[C@H]1CCCC[C@@H]1[NH2+][C@@H](C)C(C)C	d1204
	C[C@@H]1CCC[C@H](C1)[NH2+][C@@H]2CCCC[C@@H]2C	d1205
	C[C@@H](C(C)C)[NH2+]C1C2CC3CC(C2)CC1C3	d1206
	C[C@H]1CCCC[C@H]1[NH2+][C@H]2CCCC[C@@H]2C	d1207
	C[C@H]1CCCC[C@H]1C[NH2+]C2CCCC2	d1208
	CC[NH2+][C@H]1CC[C@@H](C[C@@H]1C)C(C)(C)C	d1209
	CC(C)(C)[C@@H]1CCCC[C@@H]1[NH2+]C2CCC2	d1210
	C[C@@H]1CCC[C@H](C1)[C@@H](C(C)(C)C)[NH2+]C	d1211
	C[C@@H]1CC[C@H](C2(C1)CC[NH2+]CC2)C(C)C	d1212
	CC[C@@H]1CCCC[C@@H]1[C@@H]2C[C@@H](CC[NH2+]2)C	d1213
	CC[NH2+][C@@H]1CCC[C@H]1[C@@H]2CCC[C@@H](C2)C	d1214
	CC1(CCC(CC1)[NH2+]CC(C)(C)C)C	d1215
	CC(C)C1CCC(CC1)[C@@H]2CC[NH2+]C2	d1216
	CC(C)C1CCC(CC1)[C@H]2CC[NH2+]C2	d1217
	CC(C)C[NH2+][C@@H]1[C@@]2(CC[C@@H](C2)C1(C)C)C	d1218
	CC[C@H]1CCCC[C@@H]1[NH2+][C@@H]2CC[C@@H](C2)C	d1219
	C[C@@H]1CC[C@H]([C@@H](C1)C)[NH2+]C[C@@H]2CCC=CC2	d1220
	CCC1CCC(CC1)CC2CC[NH2+]CC2	d1221
	C[C@H]1CC[C@@H]([C@@H](C1)[NH2+]CC(C)(C)C)C	d1222
	C[C@H]1CC[C@H]([C@@H](C1)[NH2+]CC(C)(C)C)C	d1223
	CCC(C)(C)[C@H]1CC[C@@H](C[C@@H]1[NH2+]C)C	d1224
	C[C@@H]1CCC[C@@H](C1)[C@@H]2CC[C@@H]([C@@H]2C)[NH2+]C	d1225
	C[C@H]1CC[C@@H]([C@@H]1C)[NH2+]CC2CCCC2	d1226
	CC[C@H]1CC[C@H](C1)[NH2+][C@@H]2CC[C@@H]([C@@H]2C)C	d1227
	CC[C@@H]1CC[C@H]([C@@H]1C)[NH2+][C@@H]2CC[C@@H](C2)C	d1228
	C1CC[C@@H]([C@@H](C1)[NH2+]CC2CCCC2)Cl	d1229
	CC(C)[C@@H]1CCC[C@H](CC1)[NH2+]C(C)C	d1230
	CC(C)[C@H]1CCC[C@@]2(CC1)CC[NH2+]C2	d1231
	C[C@H]1CCCCC[C@H]1[NH2+]CC2CCC2	d1232
	C[C@H]1CCC[C@@H](CC1)[NH2+][C@@H]2CCC=CC2	d1233
	CC[C@H]1CCCC[C@H]1[NH2+][C@@H]2CCC=CC2	d1234
	CC(C)[C@H]1CCC[C@H](CC1)C[NH2+]C	d1235
	C[C@H]1CC[C@H]([C@@H](C1)C[NH2+]C)C(C)C	d1236
	C[C@@H]1CC[C@@H]([C@@H](C1)C[NH2+]C(C)(C)C)C	d1237
	C[C@H]1CCC[C@H](CC1)C[NH2+]C(C)(C)C	d1238
	C[C@H]1CCC[C@@H](C1)C[NH2+][C@@H]2CCC[C@@H]2C	d1239
	CC[C@H]([C@H]1CCC[C@@H]([C@@H]1C)C)[NH2+]C	d1240
	CC(C)C[C@@H]1C[NH2+]CC[C@H]1C(C)(C)C	d1241
	CCC[C@H]1C[NH2+]CC[C@@H]1C(C)(C)C	d1242
	CC[C@H](C)[C@H]1CC[NH2+]C[C@@H]1C(C)C	d1243
	CC(C)[C@@H]1C[NH2+]CC[C@@H]1C2CCCC2	d1244
	C[C@@H](C1CCCC1)[NH2+][C@H]2CCCC2(C)C	d1245
	C[C@@H]1CCS[C@@H]([NH2+]1)CC2CCCCC2	d1246
	C[NH2+][C@@H](CC#C)C1CCCCCCC1	d1247
	C[C@@H]1CC(CC[C@@H]1C[NH2+]C(C)(C)C)(C)C	d1248
	C[C@H]1CC(CC[C@H]1C[NH2+]C(C)(C)C)(C)C	d1249
	C[C@@H]1CC[C@H]([NH2+]C1)CC2CCC(CC2)C	d1250
CC[NH2+]C1(CCCCC1)c2cccc(c2)C	CC1CCC(CC1)[NH2+]C2CCCCCCC2	d1251
	C=CC[NH2+][C@@H]1CCCC[C@H]1C2CCCCC2	d1252
	CC(C)(C)[C@@H]1CCCC[C@H]1[NH2+]CC2CCC2	d1253
	C1CC[C@@H]2C[C@@H](CC[C@@H]2C1)[NH2+]CC3CCCC3	d1254
	C[C@H](C1CCCCC1)[NH2+][C@@H](C)C(C)C	d1255
	C[C@@H]1C[C@@H]1[NH2+][C@@H]2CCCC[C@@H]2C(C)(C)C	d1256
	CC[NH2+][C@@H](C)[C@@H]1C[C@@H](CC[C@@H]1C(C)C)C	d1257
	C[C@@H]1CC[C@H]([C@@H](C1)C)[NH2+]CCC(C)(C)C	d1258
	C[C@H]1CC[C@H](C1)[NH2+]C(C)(C)CC(C)(C)C	d1259
	CC[C@@H]1CC[C@H](C1)[NH2+]CC2CCC(CC2)C	d1260
	CC[C@H]1CC[C@H](C1)[NH2+][C@@H]2CC[C@@H](C[C@@H]2C)C	d1261
	CC[C@@H]1CC[C@H](C1)[NH2+][C@@H](C)C2CCCC2	d1262
	C[C@H]1CCCC[C@H]1C[NH2+]C2CCC(CC2)C	d1263
	C[C@H]1CCC[C@@H](C1)[NH2+][C@@H]2CCC[C@@H](C2)C3CC3	d1264
	CC[C@H](C)[C@@H](C)[NH2+]C1C[C@@H](C[C@@H](C1)C)C	d1265
	C[C@H]1CC[C@@H](C[C@@H]1C)[C@@H]2CCCC[C@@H]2[NH2+]C	d1266
	CC[C@H]1CC[NH2+][C@H](C1)C2CCC(CC2)CC	d1267
	C[C@H]1CC[C@H]([C@@H](C1)[NH2+][C@@H](C)CC(C)C)C	d1268
	CC[C@H]1CC[C@@H]([C@@H]1C)[NH2+]CC2CCCCC2	d1269
	CC[C@@H]1CC[C@@H]([C@@H]1C)[NH2+]CC(C)(C)C	d1270
	CC[C@H](C)[C@H](C)[NH2+][C@@H]1CCC[C@@H](CC1)C	d1271
	CC[C@@H]1CCC[C@H](CC1)[NH2+]CC(C)(C)C	d1272
	CC(C)[C@@H]1CCC[C@H](CC1)[NH2+][C@@H]2CC2(C)C	d1273
	CC(C)[C@@H]1CCC[C@@H](CC1)[NH2+]C(C)(C)C#C	d1274
	CC[NH2+][C@@H](C)C1CCC(CC1)C(C)C	d1275
	C[C@H]1CCC[C@H](C1)[C@@H]([C@@H]2CC[C@@H](C2)C)[NH2+]C	d1276
	CC[NH2+][C@H]([C@H]1CCC[C@@H](C1)C)[C@@H]2C[C@@H]2C	d1277
	C[C@H]1CCCCC[C@@H]1[NH2+][C@@H](C)C2CCCC2	d1278
	C[C@H]1CCC[C@H](C1)[NH2+][C@@H]2CCCCC[C@@H]2C	d1279
	CC(C)[C@@H]1CCC[C@H](CC1)C[NH2+]C(C)C	d1280
	CC(C)(C)[C@H]1CCC[C@H](CC1)C[NH2+]C2CC2	d1281
	C[C@H]1CC[C@@H]([C@@H]1C)[NH2+]CC2CCCCCC2	d1282
	CC1CCC(CC1)[C@H]2CC[NH2+][C@H]2CC(C)C	d1283
	CC1CCC(CC1)[C@@H]2C[C@@H]2C[NH2+]C(C)(C)C	d1284
	CC[C@@H]1CC[C@@H](C1)[NH2+][C@@H]2CC[C@@H]([C@@H]2C)CC	d1285
	CC[C@H]1CS[C@@H]([NH2+]1)c2ccc(cc2)C(C)C	d1286
	C[C@@H]1CC[C@@H]([C@@H]1C)[NH2+][C@@H]2CCC[C@@H](C2)C3CC3	d1287
	CC[C@@H]1CCC[C@@H](CC1)[C@@H](CC)[NH2+]C	d1288
	CC[C@@H]1CCC[C@H](CC1)[C@@H](CC)[NH2+]C	d1289
	CC[NH2+][C@@H]([C@H]1CCC[C@@H]([C@@H]1C)C)C(C)C	d1290
	CC(C)[NH2+]C[C@H]1CCCCC[C@@H]1C2CC2	d1291
	CC#CC[C@H]1CCCCC[C@@H]1C[NH2+]C2CC2	d1292
	C[C@@H]1CC[C@H]([C@@H](C1)C2CC2)C[NH2+]C(C)(C)C	d1293
	CC(C)[C@H]1CC[C@@H]([C@@H](C1)CC#C)C[NH2+]C	d1294
	CC[NH2+]C[C@H]1CC[C@@H](C[C@@H]1C)C(C)C	d1295
	C[C@@H]1C[C@H](CC[C@@H]1C[NH2+]C2CC2)C(C)C	d1296
	CC(=C)C[C@H]1CC(CC[C@@H]1C[NH2+]C)(C)C	d1297
	C[C@@H]1CC[C@H]([NH2+]C1)C[C@@H]2CC[C@@H]([C@@H](C2)C)C	d1298
	C[C@H]1CC[C@H](C[C@@H]1C)[NH2+][C@H](C)C2CCCC2	d1299
	C1C[C@@H](CC=C1)[NH2+]C2C3CC4CC(C3)CC2C4	d1300
c1ccc(cc1)C2(CCCCC2)[NH3+]	CCC(C)(C)C1CCC(CC1)[NH3+]	d1301
	CC[C@@H](C[NH3+])c1ccc(cc1)Cl	d1302
	CC(C)C[C@H](C1CCCCC1)[NH3+]	d1303
	CC(C)C[C@H](C(C)(C)C)[NH3+]	d1304
	CCCC[C@@H]1CCCCC[C@@H]1[NH3+]	d1305
	C[C@H]1CC[C@H]([C@@H](C1)CC2CCCC2)[NH3+]	d1306
	CCC[C@@H]1C[C@@H](CC[C@@H]1[NH3+])CC	d1307
	CCC[C@@H]1C[C@H](CC[C@@H]1[NH3+])CC	d1308
	CC(C)(C)CC[C@H]1CCC[C@H]1[NH3+]	d1309
	CCC[C@@H]1CC[C@@H]([C@@H](C1)CC)[NH3+]	d1310
	CC[C@H]1C[C@H](CC[C@@H]1[NH3+])C(C)C	d1311
	CC(C)(C)[C@H]\1CCCC/C1=C\CC[NH3+]	d1312
	c1cc(c(cc1Cl)/C=C/C[NH3+])Cl	d1313
	C[C@H]1CCC[C@H](C1)[C@@H]2CCCC[C@@H]2[NH3+]	d1314
	CC(C)CC[C@H]1CCCC[C@@H](C1)[NH3+]	d1315
	CC[C@@H](C)C[C@H]1CCCCC[C@@H]1[NH3+]	d1316
	CC[C@H]1CCCC[C@@H]1[C@@](C)(CC)[NH3+]	d1317
	CC[C@@H](C)[C@@](C)(C(F)(F)F)[NH3+]	d1318
	CC[C@@H](C)[C@](C)(C(F)(F)F)[NH3+]	d1319
	CC[C@@H](C)[C@H](C1C[C@@H](C[C@@H](C1)C)C)[NH3+]	d1320
	C[C@H]1C[C@@H](CC(C1)C[C@@H](C)C[NH3+])C	d1321
	C[C@@H]1CC[C@H](C[C@@H]1C)[C@@H](CC(C)C)[NH3+]	d1322
	C[C@H]1CC[C@@H](C[C@@H]1C)[C@@H]2CC[C@@H](C2)[NH3+]	d1323
	CCC1CCC(CC1)[C@@H](C(C)C)[NH3+]	d1324
	C[C@H]1CC[C@@]([C@@H](C1)C)(CCC(C)C)[NH3+]	d1325
	CC(C)(C)[C@H]1CCC[C@@H](CC1)CC[NH3+]	d1326
	CC(C)CCC1=C[C@H](CC(C1)(C)C)[NH3+]	d1327
	C[C@@H]1CCC[C@@](C1)(CC(C)C)C[NH3+]	d1328
	C[C@H]1CC[C@@H](C1)[C@@H](CC(C)C)[NH3+]	d1329
	CC(C)(C)C1CCC(CC1)[C@H](C#C)[NH3+]	d1330
	CC[C@@H]1CCC[C@H](C1)[C@@H](C=C)[NH3+]	d1331
	CC[C@](c1ccc(s1)C)(C(C)C)[NH3+]	d1332
	C[C@@H]1CCC[C@@H](C1)[C@@H](C=C(C)C)[NH3+]	d1333
	CC(=C[C@H](CC(C)(C)C)[NH3+])C	d1334
	CC(=C)[C@H](C(C)(C)c1ccc(cc1)F)[NH3+]	d1335
	C[C@@H]1CC[C@@H]([C@@H](C1)C)[C@@H](C(C)C)[NH3+]	d1336
	C[C@@H]1CCC[C@@H](CC1)[C@@H](C(C)C)[NH3+]	d1337
	C[C@@H](C1CCCC1)[C@H](C(C)C)[NH3+]	d1338
	CC[C@@H](C)[C@]1(C[C@@H](CC(C1)(C)C)C)[NH3+]	d1339
	C[C@@H]1CCC/C(=C/2\CCC[C@H](C2)[NH3+])/C1	d1340
	C[C@@H](C[C@@H](C)[NH3+])c1ccc(s1)Cl	d1341
	C1CCC(CC1)/C(=C\C2CC2)/C[NH3+]	d1342
	CC(C)C[C@]1(CCC(C1)(C)C)[NH3+]	d1343
	CCC1CCC(CC1)C[C@H](C)[NH3+]	d1344
	CC[C@H]1CC[C@H]([C@@H](C1)C2CC2)[NH3+]	d1345
	C[C@@H]1C[C@H](CC(C1)[C@@H](C)[C@@H](C)C[NH3+])C	d1346
	CC(C)c1ccc(cc1)[C@@H]2CC[C@@H]2C[NH3+]	d1347
	CC#CC[C@@H]1C[C@H](CC[C@@H]1C[NH3+])C	d1348
	CC[C@@H]1CC[C@@H]([C@@H](C1)C2CC2)C[NH3+]	d1349
	CC#CC[C@H]1C[C@@H](CC[C@@H]1C[NH3+])C(C)C	d1350
CCC[NH2+]C1(CCCCC1)c2cccc(c2)C	C[C@@H]1CC[C@@H]([C@H](C1)[NH2+][C@@H](C)C(C)C)C(C)C	d1351
	C[C@H]1CC[C@@H]([C@H](C1)[NH2+]CC(C)C)C(C)C	d1352
	CC(C)CC[NH2+][C@H]1CCCC[C@@H]1C(C)(C)C	d1353
	C[C@H](C1CC1)[NH2+][C@H]2CCCC[C@@H]2C3CCCCC3	d1354
	CCCC1CCC(CC1)[NH2+][C@@H]2CCCC[C@H]2C	d1355
	C[C@@H]1CC[C@@H]([C@@H](C1)[NH2+][C@@H](C)C2(CC2)C)C(C)C	d1356
	CC[C@H](C)[C@H](C)[NH2+]C1C2CC3CC(C2)CC1C3	d1357
	C[C@H](c1ccc(cc1)C(C)C)[NH2+][C@H](C)C(C)C	d1358
	C1CC[C@H]([C@@H](C1)C(F)(F)F)[NH2+]CC2CCCC2	d1359
	CC(C)(C#C)[NH2+][C@@H]1CCCC[C@@H]1C2CCCCC2	d1360
	C[C@H]1CCC[C@@H](C1)CC[NH2+][C@@H]2CCCC[C@@H]2C	d1361
	C[C@@H]1CCC[C@H]1[NH2+]C2CCC(CC2)C(C)C	d1362
	CC[C@H](C)C[C@@H]1C[C@@H](CC[C@@H]1[NH2+]C)C(C)C	d1363
	C[C@H]1CCC[C@@H](C1)[C@@H](CCC(C)(C)C)[NH2+]C	d1364
	CC[C@H](C)[C@H](C)[NH2+]C1CCC(CC1)C(C)C	d1365
	CC[C@H]1CCCC[C@H]1[C@@H]2CCCC[C@@H](C2)[NH2+]C	d1366
	C[C@H]1CC[C@H](C1)[NH2+][C@@H]2CCCC[C@@H]2C(C)(C)C	d1367
	CCCC1CCC(CC1)[NH2+][C@H]2CC[C@H](C2)CC	d1368
	CC[C@H]1CC[C@H](C1)[NH2+]CC[C@@H]2CCC[C@@H](C2)C	d1369
	C[C@@H](C[C@H](C1=CCCCC1)[NH2+]C)C(C)(C)C	d1370
	CC[C@H]1CCCC[C@H]1[C@@H]2CCCC[C@@H]2[NH2+]C	d1371
	CC[C@@H](C)[C@H]([C@@H]1CC[C@@H]([C@@H](C1)C)C)[NH2+]CC	d1372
	CC[C@H]1CCC[C@@H](C1)[NH2+][C@@H]2CC[C@@H]([C@@H]2C)C	d1373
	CCC[C@@H](C1CCC(CC1)C(C)C)[NH2+]C	d1374
	CC(C)C[C@@H]1[C@H](CC[NH2+]1)C2CCCCCC2	d1375
	CCC1CCC(CC1)[C@@H]2CCCCC[C@@H]2[NH2+]C	d1376
	C[C@H]1CCC[C@@H]([C@@H]1C)[NH2+]CCC2CCCCC2	d1377
	C[C@H]1CC[C@H]([C@@H](C1)[NH2+]CCC2CCCCC2)C	d1378
	CCC1CCC(CC1)[NH2+][C@H]2C[C@H](CC[C@@H]2C)C	d1379
	C[C@H]1CCCC[C@@H]1C[NH2+][C@@H]2CCC[C@@H]([C@@H]2C)C	d1380
	CCC1CCC(CC1)[C@H](C=C(C)C)[NH2+]CC	d1381
	CC[C@@H]1CCC[C@H](CC1)[NH2+]C(C2CC2)C3CC3	d1382
	C[C@@H](CC1CC1)[NH2+][C@H]2CCC[C@@H](CC2)C(C)C	d1383
	CC(C)(C)[C@H]1CCC[C@@H](CC1)[NH2+]CC2CCC2	d1384
	CC(C)CC[C@@H]1CCCCC[C@@H]1C[NH2+]C	d1385
	CCC[C@H]1C[C@@H](CC[C@@H]1C[NH2+]C(C)(C)C)C	d1386
	C[C@H]1CC[C@H]([C@@H](C1)C(C)C)C[NH2+]CC(C)C	d1387
	CC[C@@H]1CC[C@@H]([C@@H](C1)CC)C[NH2+]C(C)(C)C	d1388
	C[C@@H]1C[C@H](CC[C@@H]1C[NH2+]C(C)(C)C)C(C)C	d1389
	CC[C@@H]1CCCC[C@@H]1[C@@H]([C@@H]2CC[C@@H](C2)C)[NH2+]C	d1390
	C[C@H]1C[C@H]1[C@@H](Cc2ccc(cc2)C(C)C)[NH2+]C	d1391
	CC[C@H]1CCC[C@@H](C1)C[C@@H]2CC[C@@H](C[NH2+]2)C	d1392
	C[C@@H](C1CCCCCC1)[NH2+]CCC(C)(C)C	d1393
	C[C@H](C1CCCCCC1)[NH2+]CC2CCCC2	d1394
	C[C@H]1CCC[C@@H]1[NH2+][C@H](C)C2CCCCCC2	d1395
	CC[C@H]1[C@H]([C@@H]([C@@H]1[NH2+]C)C)c2ccc(cc2)Cl	d1396
	C[C@@H]1CC[C@H]([C@@H](C1)C)[NH2+]CC2CCCCCC2	d1397
	C[C@@H]1CCCCC[C@H]1[NH2+]CC2CCC(CC2)C	d1398
	C[C@H]1CCC[C@H](C1)/C(=C/CC[NH2+]C(C)(C)C)/C	d1399
	CC[C@@H]1[C@H](C[C@@H]([NH2+]1)C)c2ccc(cc2)CC(C)C	d1400
Cc1cccc(c1)C2(CCCCC2)[NH+]3CCCCC3	Cc1ccc2c(c1)ccc(n2)c3cc4cc(ccc4[nH+]c3)C	d1401
	c1ccc2c(c1)cc3c([nH+]2)c4ccccc4s3	d1402
	Cc1cc([nH+]c2c1ccc(c2)Cl)N3C[C@@H](C[C@@H](C3)C)C	d1403
	C[C@@H](c1ccc(cc1Cl)Cl)[NH+]=C=S	d1404
	C/C(=C/1\C[NH+](C[C@@H]1C=C)Cc2ccccc2)/c3ccccc3	d1405
	Cc1ccccc1/[NH+]=C/c2ccc(cc2)Cl	d1406
	Cc1c(cccc1Cl)[NH+]=Cc2ccc(cc2)F	d1407
	CCC(C)(C)[C@H]1CC[C@H]([C@@H](C1)[NH+](C)C2CCCCC2)C#N	d1408
	Cc1c(cccc1Cl)/[NH+]=C\c2ccc(cc2)F	d1409
	CCC[C@H]1CC[C@H]([C@@H](C1)[NH+](C)C2CCCCCC2)C#N	d1410
	CC(C)(C)[C@@H]1CC[C@@H]([C@@H](C1)[NH+](C)C2CCCCCC2)C#N	d1411
	CCC[C@@H]1CC[C@H]([C@@H](C1)[NH+]2CC[C@@H]3CCCC[C@@H]3C2)C#N	d1412
	Cc1cc(c2c(c1)c(cc([nH+]2)C(C)C)Cl)C	d1413
	Cc1ccc2c(cc([nH+]c2c1C)C(C)C)Cl	d1414
	CC[C@H](C)n1c2ccccc2[nH+]c1/C=C/c3ccccc3	d1415
	c1cc(ccc1/C=C/c2cc[nH+]cc2)/C=C/c3ccncc3	d1416
	c1ccc(cc1)/C=[NH+]/c2ccccc2/N=C/c3ccccc3	d1417
	C[C@@H](CC(C)C)n1c2ccc(cc2[nH+]c1[C@@H](C)Cl)F	d1418
	c1ccc2=[NH+]CC(=c2c1)/C=N/c3cc(cc(c3)Cl)Cl	d1419
	Cn1c2ccccc2[nH+]c1c3ccc(cc3Cl)Cl	d1420
	CC[C@@H](C)Cn1c2ccccc2[nH+]c1c3ccccc3C	d1421
	CC[C@H](C)n1c2ccccc2[nH+]c1C(C)(C)C	d1422
	CCCn1c2ccc(cc2[nH+]c1C(C)(C)C)Cl	d1423
	CCCn1c2cc(ccc2[nH+]c1C(C)(C)C)Cl	d1424
	Cc1ccc(cc1)/C=[NH+]/[C@@H]2CC[C@@H]2/N=C/c3ccc(cc3)C	d1425
	C[C@@H]1C[C@@H](C[NH+](C1)CC(=O)c2ccc(cc2)C(C)C)C	d1426
	Cc1c(cccc1Cl)/[NH+]=C/c2cccc3c2cccc3	d1427
	c1ccc2cc(ccc2c1)/C=[NH+]/c3cccc4c3cccc4	d1428
	c1ccc2c(c1)cccc2/C=[NH+]/c3cccc4c3cccc4	d1429
	c1ccc2cc(ccc2c1)/[NH+]=C/c3cccc4c3cccc4	d1430
	c1cc2=[NH+][C@H]3CC(=O)CCCC3=c2cc1C4CCCCC4	d1431
	CC(C)c1cc(c2cccc(c2[nH+]1)C(C)(C)C)Cl	d1432
	c1ccc2cc3c(cc2c1)c(c4ccccc4[nH+]3)Cl	d1433
	CC(C)[C@@H](CCc1c[nH+]cc2c1cccc2)Br	d1434
	C[C@H](Cn1c2cc(ccc2[nH+]c1[C@@H](C)Cl)F)C(C)C	d1435
	CCc1ccc2c(c1)c(c(c([nH+]2)CC)C)Cl	d1436
	CC(C)(C[NH+]1CC[C@H]2CCCC[C@@H]2C1)CBr	d1437
	CC(C)[C@@H]1CCC[NH+](CC1)CC(C)(C)CBr	d1438
	C[C@@H]1C[C@@H](C[NH+](C1)C[C@@H](CBr)C(C)(C)C)C	d1439
	C[C@@H]1C[C@H](C[NH+](C1)C[C@@H](CBr)C(C)(C)C)C	d1440
	C[C@@H](CC(C)(C)c1c[nH+]cc2c1cccc2)Br	d1441
	C[C@@H](c1cc[nH+]cc1)[C@@H]([C@@H](C)C(C)C)Cl	d1442
	Cc1ccc[nH+]c1C[C@@H]([C@H](C)C(C)C)Cl	d1443
	Cc1ccc([nH+]c1)C[C@@H]([C@H](C)C(C)C)Cl	d1444
	CCC(C)(C)[C@H](Cc1c(ccc[nH+]1)C)Br	d1445
	C[C@@H]1CCC[C@H]([NH+]1C[C@@H](CS)C(C)C)C	d1446
	c1ccc(cc1)C/[NH+]=C/c2ccc(cc2Cl)Cl	d1447
	Cc1ccc(cc1C)[C@@H]([C@@H](C)c2cc[nH+]cc2)Cl	d1448
	C[C@@H](c1cc[nH+]cc1)[C@@H](c2cccc3c2cccc3)Cl	d1449
	Cc1ccc(cc1)/[NH+]=C\c2ccc(cc2)C(C)C	d1450
COc1ccccc1C2(CCCCC2)[NH+]3CCCCC3	CC(C)(C[NH+](C)C)[C@@H]1[C@@H]2CCCC=C2[C@H]3CCCC[C@@H]3O1	d1451
	Cc1cccn2c1[nH+]c(c2)c3ccc(cc3)c4ccccc4	d1452
	CC(C)(C)Sc1ccc2[nH+]c(cn2c1)c3ccccc3	d1453
	CC[C@@H]1CC[C@H]([C@@H](C1)[NH+](C)C2CCCCCC2)C#N	d1454
	CC[C@@H]1CC[C@@H]([C@@H](C1)[NH+]2CCC[C@@H]3[C@@H]2CCCC3)C#N	d1455
	Cc1cc(cc(c1)n2c3ccc(cc3[nH+]c2CCl)F)C	d1456
	CC[C@@H](C)n1c2ccc(cc2[nH+]c1[C@@H](C)Cl)Cl	d1457
	CCC(C)(C)n1c2ccc(cc2[nH+]c1CCCl)Cl	d1458
	C[C@@H](c1[nH+]c2cc(ccc2n1[C@@H](C)C3CC3)Cl)Cl	d1459
	CCC(C)(C)[C@@H]1CC[C@H]([C@@H](C1)[NH+](C)C2CCCC2)C#N	d1460
	CCn1c2ccc(cc2[nH+]c1c3ccc(cc3)CCl)F	d1461
	C[C@H](c1[nH+]c2cc(ccc2n1[C@@H](C)C(C)C)Cl)Cl	d1462
	C[C@H](CC(C)C)n1c2cccc(c2[nH+]c1[C@H](C)Cl)F	d1463
	CCC(C)(C)[C@@H]1CC[C@H]([C@@H](C1)[NH+]2C[C@@H](C[C@@H](C2)C)C)C#N	d1464
	CCC[C@H]1CC[C@@H]([C@@H](C1)[NH+]2C[C@@H](C[C@@H](C2)C)C)C#N	d1465
	Cc1ccc2=[NH+][C@@H]\3C(=c2c1)CCC/C3=N\Cc4ccccc4	d1466
	CC[C@H](C)c1[nH+]c2cc(ccc2n1[C@@H](C)CC)Cl	d1467
	CC[C@@H](C)n1c2ccc(cc2[nH+]c1C(C)(C)C)Cl	d1468
	CC(C)n1c2ccc(cc2[nH+]c1Cc3ccccc3)Cl	d1469
	CC(C)(C[NH+](C)C)[C@@H]1[C@H]2CCCC=C2[C@H]3CCCC[C@@H]3O1	d1470
	Cc1ccc(cc1)/C=[NH+]/[C@H]2CC[C@H]2/N=C/c3ccc(cc3)C	d1471
	Cc1cc([nH+]c(c1CCl)N2CCC[C@@H]2C3CCCC3)C	d1472
	Cc1cc([nH+]c(c1CCl)N2CCC[C@H]2C3CCCC3)C	d1473
	CCCC1CC[NH+](CC1)[C@H]2C[C@H](CC[C@@H]2C#N)CC	d1474
	Cc1ccccc1[C@H](C)n2c3ccccc3[nH+]c2CCl	d1475
	C[C@@H](c1ccc(cc1)Cl)[NH+](C)[C@@H]2CCCC[C@@H]2C#N	d1476
	CCC(C)(C)N(C)c1c2ccccc2cc([nH+]1)CCl	d1477
	CN(C)c1ccc(cc1)/C=[NH+]\c2cc(ccc2Cl)Cl	d1478
	CN(C)c1ccc(cc1)/C=[NH+]/c2cccc(c2Cl)Cl	d1479
	CC(C)c1ccc(cc1)SCc2cn3ccccc3[nH+]2	d1480
	CC(C)(C)[C@@H]1CCCN(CC1)c2cc[nH+]c(c2)CCl	d1481
	CC(C)(C)[C@H]1CCCN(CC1)c2cc[nH+]c(c2)CCl	d1482
	C[C@@H]1C[C@H]([C@@H](C(=O)C1)C[NH+]2CCC[C@@H](CC2)C(C)C)C	d1483
	Cc1ccc2c(c1)[nH+]c(n2[C@@H]3CC[C@@H]([C@@H]3C)C)[C@@H](C)Cl	d1484
	CC(C)[C@H]1CCC(=O)[C@@H](C1)C[NH+]2CCC[C@@H]3[C@@H]2CCC3	d1485
	C[C@H]1CCCC[C@@H]1[NH+](C)CC2(CCCCCC2)C=O	d1486
	C[C@@H]1CCC[C@@](C1)(C[NH+]2CCC[C@@H](CC2)C(C)C)C=O	d1487
	CCC(C)(C)[C@H]1CC[C@@H]([C@@H](C1)[NH+]2C[C@H]([C@H](C2)C)C)C#N	d1488
	CC(C)[C@@H]1CCC[NH+](CC1)C[C@@H]2CCCC(C2=O)(C)C	d1489
	CC(C)[C@H]1CCC[NH+](CC1)C[C@@H]2CCCC(C2=O)(C)C	d1490
	CCC1CCC(CC1)[NH+]2C[C@@H]3CCCCN3C[C@@H]2C(C)C	d1491
	CC[C@@H]1CN2CCCC[C@@H]2C[NH+]1[C@@H](CC)C3CCCCC3	d1492
	CC[C@H]1CN2CCCC[C@@H]2C[NH+]1CCC3CCC(CC3)C	d1493
	C[C@H](C[NH+]1C[C@H]2CCCCN2C[C@@H]1C(C)C)C(C)C	d1494
	CC[C@@H]1CN2CCCC[C@@H]2C[NH+]1C(C)(C)CC(C)(C)C	d1495
	CCCC1CCC(CC1)[NH+]2C[C@@H]3CCCN3C[C@@H]2C(C)C	d1496
	CC(C)[C@@H]1CN2CCC[C@@H]2C[NH+]1C(C)(C)CC(C)(C)C	d1497
	CC(C)[C@H]1CN2CCC[C@@H]2C[NH+]1C(C)(C)CC(C)(C)C	d1498
	CC[C@@H](C1CCCCC1)[NH+]2C[C@@H]3CCCN3C[C@@H]2C(C)C	d1499
	CC(C)C[NH+]([C@@H]1CCCCC[C@@H]1C#N)C2CCCC2	d1500
c1cc2c(cc1C3(CCCCC3)[NH+]4CCCCC4)OCCO2	c1cc(nc2c1[nH+]c(cc2)Br)Br	d1501
	Cc1cc([nH+]c2c1ccc(c2)SC)N3CCSCC3	d1502
	C[C@@H]1CCC[NH+](C1)CC(=O)c2cc(sc2Cl)Cl	d1503
	Cc1cc(c(s1)C)C(=O)C[NH+]2CC[C@@H]3CCCC[C@@H]3C2	d1504
	CC(C)(C)[C@H]1CC[C@@H]([C@@H](C1)[NH+]2CCSCC2)C#N	d1505
	C[C@@H](c1[nH+]c2c(n1[C@H](C)C3CC3)cccc2F)Cl	d1506
	c1cc(c(c(c1)Cl)Cl)/C=C\2/C(=O)C3CC[NH+]2CC3	d1507
	c1ccc2c(c1)cc([nH+]c2N3CCSCC3)CCl	d1508
	C[NH+](Cc1ccc(cc1)Br)[C@@H]2CCC[C@@H]2C#N	d1509
	Cc1cc(c[nH+]c1N2CCC(CC2)C)Br	d1510
	C[C@H]1C[C@@H]1n2c3c(ccc(c3F)F)[nH+]c2[C@@H](C)Cl	d1511
	C=CC[NH+]1CCC(CC1)c2nc3cc(ccc3s2)Cl	d1512
	C[C@@H](c1ccsc1)n2c3ccc(cc3[nH+]c2CCl)F	d1513
	C[C@@H](c1[nH+]c2c(n1Cc3ccsc3)cccc2F)Cl	d1514
	Cc1ccc(s1)CN2CCC3=c4ccccc4=[NH+][C@H]3C2	d1515
	CC[C@@H]1CC[C@H]([C@@H](C1)[NH+]2C[C@H](S[C@H](C2)C)C)C#N	d1516
	Cc1cc(c(cc1C)C(=O)C[NH+]2C[C@@H](S[C@H](C2)C)C)C	d1517
	Cc1cc(c(c(c1)C)C(=O)C[NH+]2C[C@@H](S[C@H](C2)C)C)C	d1518
	c1cc(c(c(c1)F)F)COc2cc(c[nH+]c2)C#CCCl	d1519
	CC[NH+]1CCC(=CC1)c2nc3c(cc(cc3s2)C)C	d1520
	C[C@@H](c1[nH+]c2cc(ccc2n1C)I)Cl	d1521
	CCn1c2ccc(cc2[nH+]c1CCl)I	d1522
	C[C@H]1CC[C@H]([C@@H](C1)Br)C(C)(C)c2[nH+]ccn2C	d1523
	Cc1ccoc1[C@@H]([C@@H](C)c2cc[nH+]cc2)Br	d1524
	C[C@H]1CC[C@@H]([C@@H]1C)n2c3ccccc3[nH+]c2CCCl	d1525
	CCn1cc[nH+]c1C[C@H]2CCCCC[C@H]2Br	d1526
	Cc1ccc(cc1)n2c3cc(ccc3[nH+]c2CCl)Br	d1527
	C[C@H]1CC[C@@H]([NH+](C1)CC(=O)c2ccc(s2)Cl)C	d1528
	c1cc2c(cc1F)[nH+]c(n2c3ccsc3)CCCl	d1529
	C[C@@H](c1cc[nH+]cc1)C(=O)c2csc3c2cccc3	d1530
	Cc1ccc[nH+]c1CC(=O)c2ccc(cc2)Br	d1531
	Cc1ccc[nH+]c1CC(=O)c2cccc(c2)Br	d1532
	C[C@@H](c1cc[nH+]cc1)[C@@H](c2ccc3c(c2)COC3)Cl	d1533
	C[C@H]1[C@@H](O[C@@H]([C@@H]1[C@@H]([C@@H](C)c2cc[nH+]cc2)Cl)C)C	d1534
	C[C@H]1[C@H](O[C@@H]([C@@H]1[C@@H]([C@@H](C)c2cc[nH+]cc2)Cl)C)C	d1535
	CC1(C(C1(C)C)n2c3ccc(cc3[nH+]c2CCCl)F)C	d1536
	C[C@@H]1C[C@@H](CC(C1)[NH+]2CCC[C@@H]2[C@@H]3CCCCC3=O)C	d1537
	C[C@@H]1[C@H](SCC[NH+]1C/C=C/c2ccc(cc2)C#N)C	d1538
	C[C@@H]1C[C@H](C[NH+]1CC2=CCCOC2)c3ccc(cc3)F	d1539
	C[C@@H]1CC[C@H]([C@@H](C1)Cl)C(C)(C)Cc2[nH+]ccn2C	d1540
	C[NH+]1[C@H]2CC[C@@H]1c3c(nc(s3)c4ccccc4Br)C2	d1541
	Cc1c([nH+]c(s1)N(C)C)c2ccccc2Br	d1542
	CC1(CCC[C@@H](C1=O)C[NH+]2CCC[C@@H](C2)C(F)(F)F)C	d1543
	CC(C)n1c2cc(c(cc2[nH+]c1CCCl)Cl)F	d1544
	Cc1cc(c(nc1)[NH+]2C[C@H]([C@H](C2)C)C)Br	d1545
	Cc1cc(c([nH+]c1)N(C)C2CCCC2)Br	d1546
	Cc1cc(c(nc1)[NH+](C)[C@H](C)C(C)C)Br	d1547
	CC[C@@H]1CN(CCS1)c2c(cc(c[nH+]2)C)Br	d1548
	c1cc(ccc1n2ccc3c2c[nH+]cc3Br)F	d1549
	c1cc[nH+]c(c1)/N=C\c2cccc(c2)I	d1550
c1cc2c(cc1C3(CCCCC3)[NH+]4CCCCC4)OCO2	Cn1cc(c(=S)c2c1cccc2)c3ccc4ccccc4[nH+]3	d1551
	c1ccc(cc1)C[NH+]2C[C@H]([C@@H](C2)c3ccc(cc3)Cl)C#N	d1552
	c1cc(ccc1c2ccc(o2)C[NH+]3CCSCC3)Cl	d1553
	CC1CC[NH+](CC1)CC(=O)c2ccc(cc2Cl)Cl	d1554
	c1ccc2c(c1)cc[nH+]c2Sc3c4ccccc4ccn3	d1555
	CC1CCC(CC1)N2CC[NH+](CC2)Cc3ccc(cc3)Cl	d1556
	CCN1CCC(CC1)[NH+]2CC[C@@H](C2)C3CCCCC3	d1557
	c1ccc2c(c1)cc3ccccc3c2/C=N\c4cccc[nH+]4	d1558
	CC1CC[NH+](CC1)CC(=O)c2cc(ccc2Cl)Cl	d1559
	c1cc(ccc1c2[nH+]c(=S)c3c(o2)CCCC3)Br	d1560
	Cc1ccc(cc1)[C@@H]2C[NH+](C[C@@H]2C(=O)c3ccc(cc3)F)C	d1561
	C#CCn1c2ccccc2[nH+]c1c3ccc(cc3Cl)Cl	d1562
	C[C@H]1CC[NH+](C1)[C@@H](C)C(=O)c2ccc(cc2Cl)Cl	d1563
	CN(c1c2ccccc2cc([nH+]1)CCl)[C@H]3CCSC3	d1564
	CCc1c([nH+]n(c1C)Cc2ccc(s2)Br)C	d1565
	C[C@H]1CCC[NH+]([C@@H]1C)[C@@H](C)C(=O)c2ccc(s2)Cl	d1566
	Cc1cc(ccc1n2c[nH+]c3c2cccc3)CCl	d1567
	CC[C@H](C)n1c2cc(ccc2[nH+]c1[C@@H](C)Cl)F	d1568
	C[C@H](c1cccc(c1)Cl)n2c3ccccc3[nH+]c2CCl	d1569
	C[C@H]1C[C@H]1n2c3ccc(cc3[nH+]c2CCl)Br	d1570
	C[C@@H](c1ccsc1)n2c3cc(ccc3[nH+]c2[C@H](C)Cl)F	d1571
	Cc1ccc2c(c1)[nH+]c(n2Cc3ccsc3)[C@@H](C)Cl	d1572
	Cc1ccc2c(c1)[nH+]c(n2Cc3ccsc3)[C@H](C)Cl	d1573
	C[C@@H]1CC[C@@H](C(=O)C1)C(C)(C)c2cc3ccccc3[nH+]c2	d1574
	C[C@@H]1CC[C@H](C(=O)C1)C(C)(C)c2cc3ccccc3[nH+]c2	d1575
	C[C@@H]1CSCCN1c2cc([nH+]c3c2cccc3)CCl	d1576
	c1cc(ccc1COc2cc(c[nH+]c2)C#CCCl)Cl	d1577
	c1ccc(c(c1)COc2cc(c[nH+]c2)C#CCCl)Cl	d1578
	c1cc(cc(c1)Cl)COc2cc(c[nH+]c2)C#CCCl	d1579
	C[C@@H]1CCC[C@@H]1n2c3cccc(c3[nH+]c2[C@@H](C)Cl)F	d1580
	C[C@H]1CCC[C@@H]1n2c3cccc(c3[nH+]c2[C@@H](C)Cl)F	d1581
	CCC[NH+]1C[C@H]([C@@H]2[C@H]1C3CCN2CC3)c4cc(cc(c4)F)F	d1582
	CC(C)[C@@H]1CCCN(CC1)c2cc[nH+]c(c2)CCl	d1583
	C[C@@H]1CCCC[C@@H]1[NH+](C)C[C@@H]2[C@@H](C[C@@H](CC2=O)C)C	d1584
	C[C@H]1CCCC[C@@H]1[NH+](C)C[C@@H]2[C@@H](C[C@@H](CC2=O)C)C	d1585
	C[C@H]1CC[C@@H]([C@@H]1C)n2c3ccc(cc3[nH+]c2[C@@H](C)Cl)Cl	d1586
	Cc1c[nH+]c(c(c1OC)C)CC2=C[C@H](CCC2)Cl	d1587
	C[C@@H](c1[nH+]c2ccc(cc2n1C3CCC3)Br)Cl	d1588
	Cc1cc([nH+]c(c1CCl)N2CCC(CC2)C(F)(F)F)C	d1589
	C[C@@H](c1cc[nH+]cc1)C(=O)c2c(cccc2Cl)Cl	d1590
	C[C@H]1CCC[C@](C1)(C(=O)[C@@H]2CC[C@@H]([C@@H](C2)C)C)[NH+](C)C	d1591
	C[NH+]1CCc2c(nc(s2)c3ccc(cc3)Br)C1	d1592
	CC1CCC(CC1)[NH+]2C[C@H]3CCCCN3C[C@@H]2C(C)C	d1593
	CC[C@H]1CN2CCCC[C@@H]2C[NH+]1C3C[C@@H](C[C@@H](C3)C)C	d1594
	Cc1ccc(cc1)Cn2c3cc(ccc3[nH+]c2[C@H](C)Cl)C	d1595
	Cc1ccc2c(c1)[nH+]c(n2Cc3c(ccs3)C)[C@H](C)Cl	d1596
	CCn1c2ccccc2c3c1ccc(c3)/C=[NH+]\c4ccccc4	d1597
	C[C@@H]1CC[C@H]([C@@H]1C)n2c3cc(c(cc3[nH+]c2CCl)Cl)F	d1598
	c1ccc(cc1)C#Cc2ccc(cc2)/C=N\c3[nH+]ccs3	d1599
	CC[C@H]1CC[C@H]([NH+]1c2c(cc(cn2)C)Br)C	d1600
COc1ccc(cc1)C2(CCCCC2)[NH+]3CCCC3	C[C@H]1CCCC[C@H]1N2CC[NH+](CC2)C[C@@H]3CCC=CC3	d1601
	Cc1cc(c(cc1C)C(=O)C[NH+]2C[C@@H](C[C@H](C2)C)C)C	d1602
	C[C@@H]1CC[C@H]([C@@H](C1)[NH+](C)C2CCCCCC2)C#N	d1603
	C[C@H](C1CC1)n2c3ccc(cc3[nH+]c2CCl)Cl	d1604
	C[C@@H](c1[nH+]c2cc(ccc2n1C(C)(C)C)Cl)Cl	d1605
	CCC[C@@H]1CC[C@@H]([C@@H](C1)[NH+]2CCCC[C@@H]2C)C#N	d1606
	CCC[C@@H]1CC[C@H]([C@@H](C1)[NH+](C)C2CCCC2)C#N	d1607
	CCC[C@@H](C)n1c2cccc(c2[nH+]c1CCl)F	d1608
	c1ccn2c(c1)c[nH+]c2/C=C/c3ccc(cc3)Cl	d1609
	CC(C)(C)[C@@H]1CC[C@H]([C@@H](C1)[NH+](C)CC2CC2)C#N	d1610
	CC[C@H](C)c1[nH+]c2ccc(cc2n1C(C)C)Cl	d1611
	CCCn1c2cc(ccc2[nH+]c1[C@@H](C)CC)Cl	d1612
	CC[C@H]1CCCCN1c2c(c(cc([nH+]2)C)C)CCl	d1613
	CC[C@@H]1CCCN(C1)c2c(c(cc([nH+]2)C)C)CCl	d1614
	C[NH+](CC1CCCCC1)[C@H]2CCCCC[C@@H]2C#N	d1615
	C[C@@H]1CCCC[C@H]1[NH+](C)[C@@H](C)C(=O)c2ccc(cc2)F	d1616
	C[C@@H]1CC[C@H]([C@@H](C1)[NH+]2CCC[C@@H]2C3CCCC3)C#N	d1617
	CC[C@H]1CC[C@H]([C@@H](C1)[NH+](C)[C@@H]2CCC[C@@H](C2)C)C#N	d1618
	CCCC1CC[NH+](CC1)[C@H]2C[C@@H](CC[C@@H]2C#N)C	d1619
	CC[C@@H]1CC[C@H]([C@@H](C1)[NH+]2CC[C@@H](C[C@@H]2C)C)C#N	d1620
	C[C@@H]1C[C@@H]1n2c3ccc(cc3[nH+]c2CCCl)Cl	d1621
	CCCCn1c2c(ccc(c2F)F)[nH+]c1[C@@H](C)Cl	d1622
	CC[C@@H]1CCC(=O)[C@H](C1)C[NH+](C)[C@@H]2CCCC[C@@H]2C	d1623
	Cc1ccc(cc1)/C=N/c2cccc3c2ccc[nH+]3	d1624
	c1cc(oc1)/C=[NH+]/c2ccc(c(c2)Cl)Cl	d1625
	CCc1ccc(cc1)c2cn3cc(ccc3[nH+]2)F	d1626
	CC(C)Cc1ccc(cc1)c2cn3cc(ccc3[nH+]2)F	d1627
	CC[C@H](C)Sc1[nH+]c2cc(ccc2n1C)Cl	d1628
	CCC[C@H]1CCCN(CC1)c2ccc(c[nH+]2)CCl	d1629
	C[C@H]1C[C@H]1C[NH+](C)Cc2c(ccc(n2)Cl)Cl	d1630
	CC(C)[C@H](C[NH+]1CCOCC1(C)C)CBr	d1631
	Cc1c([nH+]n(c1C)C[C@@H](CBr)C(C)C)C	d1632
	c1cc(ccc1/C=N/c2ccc(c[nH+]2)Cl)Cl	d1633
	CC(C)(CCC[NH+]1CC[C@H]2CCCC[C@@H]2C1)C#N	d1634
	CC(C)(CCC[NH+]1CCC[C@H]2[C@@H]1CCCC2)C#N	d1635
	Cc1cc([nH+]c(c1CCl)N2CCC[C@@H]3[C@@H]2CCC3)C	d1636
	CC(=O)c1ccccc1Cc2cc[nH+]c3c2cccc3	d1637
	CC(C)[C@@H]1CCC(=O)[C@@H](C1)C[NH+]2CCC[C@@H]2C(C)C	d1638
	c1cc([nH+]cc1Cl)N2CCC[C@@H]2C3CCCC3	d1639
	C[C@@H](c1cc[nH+]cc1)[C@@H](c2cc3ccccc3o2)Cl	d1640
	CC(C)(C)c1ccc(cc1)C(=O)C(C)(C)[NH+](C)C	d1641
	Cc1cc(cc(c1)F)C[NH+]2C[C@H]([C@@H](C2)N(C)C)C(C)C	d1642
	Cc1cc(c(cc1C)C(=O)C[NH+]2C[C@H]([C@@H](C2)C)C)C	d1643
	c1ccc2c(c1)ccn2Cc3cc[nH+]c4c3cccc4	d1644
	CC(C)[C@H]1CN2CCCC[C@@H]2C[NH+]1CC3CCCC3	d1645
	C[C@@H]1CCCCC[C@@H]1[NH+]2C[C@@H]3CCCN3C[C@@H]2C(C)C	d1646
	C[C@H]1CC[C@@H]([C@@H](C1)[NH+](C)C2CCC(CC2)(C)C)C#N	d1647
	c1ccc2c(c1)ccc([nH+]2)/C=C\c3ccc(cc3)C#N	d1648
	Cc1cc(c([nH+]c1)N(C)CC(C)(C)C)Br	d1649
	CCC(C)(C)[NH+](C)c1c(cc(cn1)C)Br	d1650
COc1ccccc1C2(CCCCC2)[NH+]3CCCC3	C[NH+](C)C[C@H]1CCCCCCCCCC(=C)C1=O	d1651
	Cc1[nH+]c2ccccc2n1C/C=C\c3ccccc3	d1652
	Cc1cc(c(cc1C)C(=O)C[NH+]2C[C@H](C[C@@H](C2)C)C)C	d1653
	C[C@@H](C1CC1)n2c3ccc(cc3[nH+]c2CCl)Cl	d1654
	CCCCn1c2ccc(cc2[nH+]c1[C@H](C)Cl)F	d1655
	CCC(C)(C)[C@@H]1CC[C@@H]([C@@H](C1)[NH+](C)C2CC2)C#N	d1656
	CCC(C)(C)[C@H]1CC[C@@H]([C@@H](C1)[NH+](C)C2CC2)C#N	d1657
	CCC(C)(C)[C@H]1CC[C@H]([C@@H](C1)[NH+](C)C2CC2)C#N	d1658
	CC(C)(C)[C@H]1CC[C@@H]([C@@H](C1)[NH+](C)C2CCCC2)C#N	d1659
	CCC[C@H]1CC[C@@H]([C@@H](C1)[NH+](C)C2CCCC2)C#N	d1660
	CCC[C@H]1CC[C@@H]([C@@H](C1)[NH+]2CCC[C@@H]2CC)C#N	d1661
	C[C@@H](c1[nH+]c2c(n1[C@H](C)C(C)C)cccc2F)Cl	d1662
	C[C@H]1CC[C@@H]([C@@H](C1)[NH+](C)CC2CCCCC2)C#N	d1663
	Cc1ccc(cc1)c2c[nH+]c(n2C)SCC(C)C	d1664
	CC[C@H]1CC[C@@H]([C@@H](C1)[NH+](C)Cc2ccc(cc2)F)C#N	d1665
	C[C@@H]1CC[C@@H]([C@@H](C1)[NH+](C)Cc2ccc(cc2)Cl)C#N	d1666
	Cc1ccc(cc1)N(C)c2cc[nH+]c(c2)CCl	d1667
	CC[C@@H]1CC[C@H]([C@@H](C1)[NH+]2CCC[C@@H]([C@@H]2C)C)C#N	d1668
	CCCC1CC[NH+](CC1)[C@@H]2C[C@@H](CC[C@@H]2C#N)C	d1669
	CCCC1CC[NH+](CC1)[C@H]2C[C@H](CC[C@@H]2C#N)C	d1670
	CCc1ccc(cc1)N(C)c2cccc([nH+]2)CCl	d1671
	CCC(C)(C)n1c2cc(ccc2[nH+]c1CCl)F	d1672
	CCC[C@H]1CCC(=O)[C@H](C1)C[NH+]2CCC[C@@H]([C@@H]2C)C	d1673
	C[C@@H]1CCCC[C@H]1[NH+](C)C[C@@H]2CCCCCC2=O	d1674
	CCC[C@@H]1CCC(=O)[C@H](C1)C[NH+]2CC[C@@H](C[C@@H]2C)C	d1675
	CC1CC[NH+](CC1)C[C@@H]2C[C@H](CCC2=O)C(C)C	d1676
	CC(C)[C@@H]1CCC(=O)[C@@H](C1)C[NH+](C)C2CCCC2	d1677
	CCC1CC[NH+](CC1)C[C@@H]2C[C@@H](CCC2=O)C(C)C	d1678
	C[C@H]1CC[NH+]([C@@H](C1)C)C[C@@H]2C[C@@H](CCC2=O)C(C)C	d1679
	C[C@H](C(C)C)[NH+](C)Cc1c(ccc(n1)Cl)Cl	d1680
	CC(C)c1ccc(cc1)Cn2cc[nH+]c2C(C)C	d1681
	C[C@](CCc1cc[nH+]cc1)(C#N)c2ccc(cc2)Cl	d1682
	CCC[C@H]1CCC[NH+](CC1)[C@@H]2CCCC[C@@H]2C#N	d1683
	CCC[C@@H]1CCCN(CC1)c2ccc(c[nH+]2)CCl	d1684
	C[C@@H]1C[NH+](C[C@@H]1C)Cc2c(ccc(n2)Cl)Cl	d1685
	Cc1c[nH+]c(c(c1OC)C)C[C@H]2CC[C@@H]([C@@H]2C)Cl	d1686
	c1ccc2c(c1)c(cc[nH+]2)Cc3ccc(c(c3)F)C=O	d1687
	c1ccn2cc([nH+]c2c1)Cc3ccc(cc3)Cl	d1688
	C[C@H]1CCC[C@](C1)(C[NH+](C)[C@@H]2CCCC[C@@H]2C)C=O	d1689
	C[C@@H](c1cc[nH+]cc1)C(=O)C2CCC(CC2)C(C)(C)C	d1690
	Cc1ccc[nH+]c1CC(=O)c2ccc(c(c2)Cl)C	d1691
	Cc1ccc[nH+]c1CC(=O)c2ccc(cc2)C(C)C	d1692
	Cc1cc2ccccc2n1Cc3cc[nH+]c4c3cccc4	d1693
	CC(C)[C@@H]1CN2CCCC[C@@H]2C[NH+]1C3CCCCC3	d1694
	CC[C@@H]1CN2CCCC[C@@H]2C[NH+]1CCC3CCCC3	d1695
	CC[C@H]1CN2CCCC[C@@H]2C[NH+]1[C@@H]3CC[C@@H](C[C@@H]3C)C	d1696
	CC[C@@H]1CN2CCCC[C@@H]2C[NH+]1[C@@H](C)C3CCCC3	d1697
	C[C@H]1CCCC[C@H]1C[NH+]2CCCN3CCCC[C@@H]3C2	d1698
	CC(C)CN(c1ccc(c[nH+]1)Cl)C2CCCC2	d1699
	Cc1ccc(cc1c2cccc3c2ccc[nH+]3)C=O	d1700
COc1ccc(cc1)[C@]2(C[C@@H]3CC[C@H]2C3)[NH+]4CCCC4	c1ccc2c(c1)[nH+]cn2c3ccc(cc3)C(F)(F)F	d1701
	CCc1ccc(cc1)C(=O)C[NH+]2C[C@@H](C[C@H](C2)C)C	d1702
	C[C@@H]1C[C@H](C[NH+](C1)[C@@H](C)C(=O)c2ccc(cc2)F)C	d1703
	C[C@@H](c1[nH+]c2cc(ccc2n1C(C)(C)C)F)Cl	d1704
	C[C@H](c1[nH+]c2cc(ccc2n1C(C)(C)C)F)Cl	d1705
	CC[C@@H](C)[NH+](C)Cc1cc2ccccc2nc1Cl	d1706
	CC[C@H](C)n1c([nH+]c2c1ccc(c2)C(F)(F)F)C	d1707
	Cc1cc([nH+]c(c1CCl)N2CCC[C@@H](C2)C)C	d1708
	C[C@H]1CCCC[C@H]1[NH+](C)Cc2ccc(nc2)Cl	d1709
	Cc1ccc(s1)C(=O)C[NH+](C)[C@@H]2CCCC[C@@H]2C	d1710
	Cc1ccc(s1)C(=O)C[NH+](C)[C@H]2CCCC[C@@H]2C	d1711
	C[C@H]1CCCC[C@@H]1[NH+](C)Cc2ccnc(c2)Cl	d1712
	CC(C)(C)n1c2cc(ccc2[nH+]c1CCCl)F	d1713
	CC[C@H](C)n1c([nH+]c2c1c(c(cc2)F)F)CCCl	d1714
	CCCn1c2c(ccc(c2F)F)[nH+]c1[C@H](C)Cl	d1715
	CC[C@@H]1CCC(=O)[C@@H](C1)C[NH+]2C[C@@H](C[C@@H](C2)C)C	d1716
	CCC[C@@H]1CCC(=O)[C@@H](C1)C[NH+]2CCC(CC2)C	d1717
	CCC[C@@H]1CCC(=O)[C@H](C1)C[NH+]2CCC(CC2)C	d1718
	CC[C@H]1CCC(=O)[C@H](C1)C[NH+]2CCC[C@@H]2C3CCCC3	d1719
	C[NH+](C[C@@H]1CCCCCC1=O)CC2CCCCC2	d1720
	CCCc1[nH+]c2ccccc2n1C(C(F)F)(F)F	d1721
	C[C@@H](c1cccnc1)[NH+](C)Cc2ccc3ccccc3c2	d1722
	Cc1csc([nH+]1)N2CC[C@@H](C2)c3ccc(cc3)F	d1723
	CC[C@H]1CCCN(CC1)c2cc[nH+]c(c2)CCl	d1724
	CC[C@@H]1CCCN(CC1)c2ccc(c[nH+]2)CCl	d1725
	c1ccc(cc1)C(=O)CCc2cccc3c2cc[nH+]c3	d1726
	C[C@@H]1CC[C@H]([C@@H](C1)Cl)C(C)(C)c2[nH+]ccn2C	d1727
	C[C@H](c1[nH+]c2ccc(cc2n1CCC3CC3)F)Cl	d1728
	Cc1ccc(cc1)C(=O)Cc2cc[nH+]c3c2cccc3	d1729
	Cc1ccccc1CC(=O)Cc2cc[nH+]c3c2cccc3	d1730
	CC(=O)c1cccc(c1)Cc2ccc3ccccc3[nH+]2	d1731
	C[C@H]1CCC[C@H](C1)[NH+](C)CC2(CCC(CC2)C)C=O	d1732
	C[C@H]1CCC[C@@](C1)(C[NH+](C)C2CCC(CC2)C)C=O	d1733
	C[C@H]1CCC[C@@](C1)(C[NH+]2C[C@@H](CC[C@@H]2C)C)C=O	d1734
	C[C@@H]1CCC[C@](C1)(C[NH+]2CCC[C@@H]2C(C)C)C=O	d1735
	Cc1ccc(cc1Cl)C(=O)[C@H](C)c2cc[nH+]cc2	d1736
	CC(C)(C)c1ccc(s1)CN2CCC(CC2)[NH+](C)C	d1737
	CC[C@@H](c1nc(cs1)CCl)[NH+]2C[C@H]([C@H](C2)C)C	d1738
	CCC[C@H]1CCC(=O)[C@H](C1)C[NH+]2C[C@H]([C@H](C2)C)C	d1739
	Cc1cc(c2ccccc2[nH+]1)Cn3cc(c(c3C)C)C	d1740
	CCCC1CCC(CC1)[NH+]2CCC(=O)[C@H]([C@@H]2C)C	d1741
	CC[C@@H](C)C[NH+]1C[C@@H]2CCCCN2C[C@@H]1C(C)C	d1742
	CC[C@@H](C)[C@@H](C)[NH+]1C[C@@H]2CCCN2C[C@@H]1C(C)C	d1743
	CC[C@H](C)[C@@H](C)[NH+]1C[C@@H]2CCCN2C[C@@H]1C(C)C	d1744
	Cc1ccc(o1)/C=[NH+]\c2ccc(cc2)Br	d1745
	C[C@@H]1C[C@@H]([C@@H](C(=O)C1)C[NH+](C)[C@@H](C)C(C)(C)C)C	d1746
	C[C@H]1C[C@H](CCN1C)[NH+](C)CCC2CCCCC2	d1747
	CCN(CC(=C)C)c1c(cc(c[nH+]1)C)Br	d1748
	Cc1cc(c(nc1)[NH+](CC=C)C(C)C)Br	d1749
	Cc1ccccc1CSCc2cn3ccccc3[nH+]2	d1750
c1cc2c(cc1[C@@]3(C[C@@H]4CC[C@H]3C4)[NH+]5CCCCC5)OCO2	C[NH+](C)C[C@H]1CCCC(=Cc2ccc(cc2)Cl)C1=O	d1751
	c1cc([nH+]cc1c2ccnc(c2)Br)Br	d1752
	Cc1cc2c(cc1C)sc(n2)/C=C/c3ccc[nH+]c3	d1753
	CC[C@@H](C)N1CC[NH+](CC1)C2C3CC4CC(C3)CC2C4	d1754
	CCc1ccc(cc1)n2c3ccccc3[nH+]c2[C@@H](C)Cl	d1755
	CC1CC[NH+](CC1)[C@@H](C)C(=O)c2ccc(s2)Cl	d1756
	c1ccn2cc([nH+]c2c1)c3ccc(s3)Br	d1757
	c1ccc(cc1)c2cn(c[nH+]2)c3ccc(cc3)Br	d1758
	c1cc(c(cc1Cl)Cl)/C=C\2/C(=O)C3CC[NH+]2CC3	d1759
	c1cc(ccc1C2=[NH+]C(=S)[C@@H](C3=C2CCCC3)C#N)Cl	d1760
	Cc1cc(cc(c1[C@@H]2C=C(N=[NH+]2)c3ccccc3)C)Br	d1761
	c1c[nH+]c(cc1CCl)N2CCC[C@@H]3[C@@H]2CCCC3	d1762
	c1ccc2c(c1)c(cc[nH+]2)Oc3ccccc3Br	d1763
	C[C@@H]1c2ccsc2CCN1c3ccc(c[nH+]3)CCl	d1764
	c1ccc2c(c1)[nH+]cn2Cc3c(ccs3)Br	d1765
	c1c[nH+]c(cc1CCl)N2CCC[C@H]2C3CCCC3	d1766
	C[C@@H]1C[NH+](CCC1=O)[C@@H](C)c2ccc(cc2Cl)Cl	d1767
	Cc1ccc(cc1)C(=O)[C@H](C)[NH+]2CCc3c(ccs3)C2	d1768
	C[C@@H](c1ccccc1Cl)N(C)c2cccc([nH+]2)F	d1769
	C[C@@H]1C[NH+](C[C@H](S1)C)Cc2c(ccc(n2)Cl)Cl	d1770
	C[C@@]12CCC(=O)C=C1CC[C@H]3[C@H]2CC[C@]4([C@@H]3CC[C@]4(C)[NH+](C)C)C	d1771
	Cc1c([nH+]c(s1)N2CCSCC2)c3ccc(cc3)F	d1772
	C[C@H](c1[nH+]c2ccc(cc2n1C3CC3)Br)Cl	d1773
	CC(C)[C@H]1CCCN1c2ccc(c[nH+]2)Br	d1774
	C[C@H]1CCC[C@H](C1)[NH+](C)C[C@@H]2[C@@H](C[C@@H](CC2=O)C)C	d1775
	CC/C(=C\c1cn2ccccc2[nH+]1)/CBr	d1776
	CC(C)/C(=C\c1cn2ccccc2[nH+]1)/CBr	d1777
	C[C@H]1CC[C@@H]([C@@H](C1)[NH+]2CCC[C@@H](C2)C(F)(F)F)C#N	d1778
	CC1CCC(CC1)C(=O)Cc2cc[nH+]c3c2cccc3	d1779
	c1ccc2c(c1)ccc([nH+]2)Cc3ccc(c(c3)C=O)F	d1780
	C[C@H]1c2ccsc2CCN1c3ccc(c[nH+]3)Cl	d1781
	C[C@@H](c1cccc[nH+]1)[C@@H](c2coc3c2cccc3)Cl	d1782
	C[C@H]1CCC[C@@H](C1)C(=O)C2(CCC(CC2)C)[NH+](C)C	d1783
	C[C@@H]1CCC[C@H](C1)C(=O)[C@@]2(CCC[C@@H](C2)C)[NH+](C)C	d1784
	C[C@@H]1CCC[C@](C1)(C(=O)C2CCC(CC2)C)[NH+](C)C	d1785
	C[C@@H]1C[NH+](C[C@H]1C)[C@@H](C)C(=O)c2ccc(cc2)Cl	d1786
	C[C@H]1CCc2c(sc(n2)C[NH+]3C[C@H]4CCC[C@@H]4C3)C1	d1787
	C[C@H]1C[C@@H](CC(C1)[NH+]2CCC[C@@H]2[C@@H]3CCCCC3=O)C	d1788
	C1C[NH+](CCC1C2CCOCC2)C[C@H]3C[C@H]4C[C@@H]3C=C4	d1789
	C[C@@H]1CCCC[C@@H]1[NH+](C)C[C@@H]2CCCC(C2=O)(C)C	d1790
	C[C@H]1CCCC[C@@H]1[NH+](C)C[C@@H]2CCCC(C2=O)(C)C	d1791
	C[C@@H]1C[C@H](CC(C1)[NH+]2C[C@@H]3CCCCN3C[C@@H]2C)C	d1792
	C[C@@H]1CC[C@@H](C[C@@H]1C)[NH+]2C[C@@H]3CCCCN3C[C@@H]2C	d1793
	CC[C@H]1CC[C@@H]([C@@H]1C)[NH+]2C[C@@H]3CCCCN3C[C@@H]2C	d1794
	CC[C@H]1CN2CCC[C@@H]2C[NH+]1[C@@H]3CC[C@@H](C[C@@H]3C)C	d1795
	C[C@@H](C1CCCC1)[NH+]2C[C@H]3CCCN3C[C@@H]2C(C)C	d1796
	CC[C@H]1CN2CCC[C@@H]2C[NH+]1C3C[C@@H](C[C@@H](C3)C)C	d1797
	C[C@@H]1C[C@H](CC(C1)[NH+]2C[C@@H]3CCCN3C[C@@H]2C(C)C)C	d1798
	CC[C@@H]1CC[C@H]([C@@H]1C)[NH+]2C[C@@H]3CCCN3C[C@@H]2CC	d1799
	CC[C@H]1CC[C@H]([C@@H]1C)[NH+]2C[C@@H]3CCCN3C[C@@H]2CC	d1800
COc1ccc(cc1)[C@]2(C[C@@H]3CC[C@H]2C3)[NH+]4CCCCC4	CCc1ccc(cc1)C[NH+]2CCN(CC2)C3CCC(CC3)C	d1801
	CCC(CC)n1c2ccc(cc2[nH+]c1CCl)Cl	d1802
	C[C@H](c1[nH+]c2cc(ccc2n1C(C)(C)C)Cl)Cl	d1803
	C[C@H](C1CC1)n2c3ccc(cc3[nH+]c2CCCl)Cl	d1804
	C[C@H](c1[nH+]c2c(n1Cc3cccs3)cccc2F)Cl	d1805
	Cn1c2ccc(cc2[nH+]c1[C@@H](c3ccccc3)Cl)Cl	d1806
	C[C@H](c1[nH+]c2c(n1CC(C)(C)C)cccc2F)Cl	d1807
	CN(Cc1ccsc1)c2c3ccccc3cc([nH+]2)CCl	d1808
	CSc1[nH+]cc(n1CC=C)c2ccc(c(c2)Cl)Cl	d1809
	C[C@@H]1CCC[C@@H](C1)[NH+](C)[C@@H](C)C(=O)c2ccc(s2)Cl	d1810
	C[C@@H]1CCC[C@H](C1)[NH+](C)[C@@H](C)C(=O)c2ccc(s2)Cl	d1811
	C[C@@H](c1[nH+]c2c(n1C(C3CC3)C4CC4)cccc2F)Cl	d1812
	C[C@@H](c1ccc(cc1)Cl)n2c3ccccc3[nH+]c2CCl	d1813
	C[C@H]1C[C@H]1n2c3c(cccc3Cl)[nH+]c2[C@@H](C)Cl	d1814
	c1ccc(cc1)/[NH+]=C\Cc2c(cc(cn2)C(F)(F)F)Cl	d1815
	C[C@@H]1CC[NH+]([C@@H](C1)C)C[C@@H]2C[C@@H](CCC2=O)C(C)(C)C	d1816
	C[C@@H]1C[C@@H](C[NH+](C1)[C@@H](C)C(=O)c2ccc(s2)Cl)C	d1817
	C[C@@H]1C[C@@H](C[NH+](C1)[C@@H](C)C(=O)c2ccc(cc2)Cl)C	d1818
	C[C@H](c1ccc(cc1)Cl)[NH+](C)Cc2ccnc(c2)Cl	d1819
	C[NH+](Cc1ccc(cc1)F)Cc2c(ccc(n2)Cl)Cl	d1820
	C[C@H](c1cccc(c1)Cl)N(C)c2cc[nH+]c(c2)CCl	d1821
	C[C@H](c1ccccc1Cl)N(C)c2cc(cc[nH+]2)CCl	d1822
	C[C@@H](c1cccc(c1)Cl)N(C)c2cc(cc[nH+]2)CCl	d1823
	C[C@H](c1ccc(cc1)Cl)N(C)c2cccc([nH+]2)CCl	d1824
	C[C@@H](CC1CC1)n2c3cc(ccc3[nH+]c2[C@H](C)Cl)F	d1825
	C[C@H](CC1CC1)n2c3cccc(c3[nH+]c2[C@@H](C)Cl)F	d1826
	C[C@H](CC1CC1)n2c3c(ccc(c3F)F)[nH+]c2[C@H](C)Cl	d1827
	CC[C@@H]1CCCN(CC1)c2c(c(cc([nH+]2)C)C)CCl	d1828
	C[C@@H]1CC[C@H]([C@@H]1C)n2c([nH+]c3c2c(c(cc3)F)F)CCl	d1829
	CC[C@H]1CC[C@H]([C@@H]1C)n2c3cc(ccc3[nH+]c2CCl)F	d1830
	CC[C@H]1CC[C@@H]([C@@H]1C)n2c3cccc(c3[nH+]c2CCl)F	d1831
	CC[C@H](Cn1c[nH+]c2c1cc(c(c2)C)C)CBr	d1832
	CC(C)(C)[C@@H](Cn1c[nH+]c2c1cccc2)CBr	d1833
	CC(C)[C@@H]1CCC(=O)[C@H](C1)C[NH+]2CCC[C@@H](C2)C(F)(F)F	d1834
	CC(C)[C@H]1CCC(=O)[C@@H](C1)C[NH+]2CCC(CC2)C(F)(F)F	d1835
	CCC1CCC(CC1)C(=O)Cc2cc[nH+]c3c2cccc3	d1836
	CCC1CCC(CC1)C(=O)[C@]2(CCC[C@H](C2)C)[NH+](C)C	d1837
	C[C@@H]1C[NH+](C[C@H]1C)CC(=O)c2cc(ccc2Cl)Cl	d1838
	CC(C)[C@H]1CCC(=O)[C@H](C1)Cc2cc[nH+]c3c2cccc3	d1839
	CC(C)C1CCC(CC1)C(=O)[C@H]2CCc3c2[nH+]ccc3	d1840
	CCc1ccc([nH+]c1)CC(=O)c2cccc3c2cccc3	d1841
	CCn1cc[nH+]c1CC(C)(C)[C@@H]2CC[C@H](C[C@@H]2Cl)C	d1842
	CCn1c2ccccc2[nH+]c1C[C@H]3CC[C@H]([C@@H]3C)Cl	d1843
	C[C@@H](c1ccccc1Cl)[NH+](C)Cc2cnc(s2)Cl	d1844
	C[C@@H]1CC[C@H](C[C@@H]1C)[NH+]2C[C@@H]3CCCCN3C[C@@H]2C(C)C	d1845
	C[C@@H]1CCCCC[C@H]1[NH+]2C[C@@H]3CCCN3C[C@@H]2C(C)C	d1846
	C[C@H]1CCC[C@@](C1)(C[NH+](C)C2CCC(CC2)(C)C)C=O	d1847
	Cc1cc(c(nc1)[NH+](C)[C@H](C)CC(C)C)Br	d1848
	Cc1cc(c([nH+]c1)N(C)[C@H](C)C(C)(C)C)Br	d1849
	c1ccc2c(c1)cccc2/C=N/c3ccc(c[nH+]3)Cl	d1850
c1cc(sc1)[C@]23CC[C@H](C2)C[C@@H]3[NH+]4CCCCC4	c1ccc2c(c1)c(c(c[nH+]2)Br)Br	d1851
	c1cc[nH+]c(c1)SCc2c(cccc2Cl)F	d1852
	CC(C)[NH+](C)Cc1ccc(cc1)Br	d1853
	C[NH+](Cc1ccc(cc1)Br)CC(F)(F)F	d1854
	C[C@H]1CCCC[C@@H]1[NH+](C)CCBr	d1855
	CC[NH+](Cc1c(ccs1)Br)C(C)C	d1856
	C1CC[C@@H]2C[NH+](CC[C@@H]2C1)CCCCCl	d1857
	C[C@H](c1ccc(cc1)F)SC2=[NH+]CCS2	d1858
	CC(C)[NH+](C)Cc1ccc(s1)Br	d1859
	CC[C@@H](C)[NH+](C)Cc1ccc(cc1)Br	d1860
	C[NH+](Cc1ccc(cc1)Cl)Cc2ccccc2F	d1861
	c1ccc(c(c1)CSC2=[NH+]CCS2)Cl	d1862
	c1cc2c[nH+]ccc2c(c1)CCCBr	d1863
	Cc1c(ccc([nH+]1)I)C=C	d1864
	C[C@H](C[C@@H](C)Br)c1c[nH+]cc2c1cccc2	d1865
	C[C@H](C[C@@H](C)Br)c1cccc2c1cc[nH+]c2	d1866
	CC[C@H](C[NH+]1CCC[C@@H](C1)C)CBr	d1867
	CC[C@@H](C[NH+]1C[C@H](S[C@H](C1)C)C)CBr	d1868
	CC(C)[C@H](C[NH+]1CCCSCC1)CBr	d1869
	C[C@@H]1CSCC[NH+]1C[C@@H](CBr)C(C)C	d1870
	CC1(CCC[NH+](CC1)CC2(CC2)CBr)C	d1871
	C1C[C@@H]2CCC[NH+]([C@@H]2C1)CCCCBr	d1872
	C[C@@H](CC(C)(C)Cc1cc[nH+]cc1)Br	d1873
	C[C@@H]1CC[C@@H]([NH+](C1)CC2(CCC2)CBr)C	d1874
	c1ccc(c(c1)[C@H](Cc2cccc[nH+]2)Cl)Cl	d1875
	c1cc(ccc1[C@H](Cc2cc[nH+]cc2)Cl)Cl	d1876
	C[C@@H](c1cc[nH+]cc1)[C@H](c2ccsc2)Br	d1877
	Cc1ccc(s1)[C@H](Cc2cccc[nH+]2)Br	d1878
	c1c[nH+]ccc1C[C@@H](CC2CCCC2)Br	d1879
	Cc1ccc([nH+]c1)C[C@@H](CC(C)C)Br	d1880
	Cc1ccc([nH+]c1)C[C@@H](CC2CC2)Br	d1881
	C[C@@H]1C[NH+](C[C@H]1C)CC2(CCC2)CBr	d1882
	CCc1ccc([nH+]c1)C[C@H](C)[C@@H](C)Br	d1883
	CC(C)CC[NH+]1[C@@H]2CC[C@H]1CC(C2)Br	d1884
	C1C[C@H]2C[C@@H]1C[C@@H]2C[NH+]3CCC(CC3)Br	d1885
	CC(C)(C)CC[NH+]1CCC(CC1)Br	d1886
	C1C[C@@H]2C[C@H]1C[C@@H]2C[NH+]3CC[C@@H](C3)CBr	d1887
	CC(C)C[NH+]1CCC[C@H](C1)CCBr	d1888
	c1cc2ccc(cc2[nH+]c1)[C@@H]3CCC[C@@H]3Cl	d1889
	c1cc2ccc(cc2[nH+]c1)[C@@H]3CCC[C@@H]3Br	d1890
	C[C@@H](C[C@@H](C)Br)c1cccc2c1[nH+]ccc2	d1891
	C/C(=C/CCBr)/c1cccc2c1ccc[nH+]2	d1892
	C[C@H]1CC[C@H]([C@@H](C1)[NH+]2C[C@@H](CC[C@@H]2C)C)C#N	d1893
	Cc1cc(cc(c1)CSC2=[NH+][C@H](CS2)C)C	d1894
	CC1=CC[NH+](CC1)Cc2ccc(s2)Br	d1895
	CCc1ccc(cc1)C[NH+](C)[C@@H]2CCSC2	d1896
	Cc1ccc([nH+]c1)C[C@H](C2C(C2(C)C)(C)C)Cl	d1897
	C[C@H]1CCCC[C@H]1[NH+]2CCN3CCCC[C@@H]3C2	d1898
	C[C@H]1CCC[C@H]([C@@H]1C)N2C[C@@H]3CCC[NH+]3C[C@@H]2C	d1899
	c1cc[nH+]c(c1)CSCc2ccc(cc2)Cl	d1900
c1cc2c(cc1C3(CCCCC3)[NH+]4CCCC4)OCO2	C[C@H]1C[NH+](C[C@@H](O1)C)C2C3CC4CC(C3)CC2C4	d1901
	CN(C)c1cc2ccccc2[nH+]c1c3ccccc3	d1902
	CCn1c(c[nH+]c1S)c2ccc(cc2)Cl	d1903
	C[C@@H](C1CC1)n2c3ccc(cc3[nH+]c2CCl)F	d1904
	C[C@H](C1CC1)n2c3cccc(c3[nH+]c2CCl)F	d1905
	C1CC[C@@H](C(=O)CC1)[NH+]2CCC[C@@H]3[C@@H]2CCCC3	d1906
	CC(C)(C)n1c[nH+]c2c1ccc(c2)Br	d1907
	CC(C)Cn1c2ccc(cc2[nH+]c1C3CC3)Cl	d1908
	CC[C@@H]1CCCN(C1)c2cc[nH+]c(c2)CCl	d1909
	CC[C@H]1CCCCN1c2ccc(c[nH+]2)CCl	d1910
	Cc1cccc2n1cc([nH+]2)c3ccc(cc3)Cl	d1911
	C[NH+](Cc1ccc(cc1)Cl)[C@@H]2CCC[C@@H]2C#N	d1912
	C[C@@H]1CCC[C@H](C1)[NH+](C)[C@@H]2C[C@@H](CC[C@@H]2C#N)C	d1913
	C[C@@H]1CC[C@H]([C@@H](C1)[NH+](C)Cc2ccc(cc2)F)C#N	d1914
	CCc1ccc(cc1)c2cn3c([nH+]2)[C@H](CCC3)C	d1915
	CN(c1ccc(cc1)F)c2ccc(c[nH+]2)CCl	d1916
	Cc1ccc(cc1)N(C)c2ccc(c[nH+]2)CCl	d1917
	CN(c1ccccc1F)c2ccc(c[nH+]2)CCl	d1918
	C[C@@H]1C[C@H]1n2c3ccc(cc3[nH+]c2CCCl)F	d1919
	C[C@H]1CCC(=O)[C@@H](C1)C[NH+]2CC[C@@H]3CCCC[C@@H]3C2	d1920
	C[C@@H]1CC[NH+](C1)C[C@@H]2C[C@@H](CCC2=O)C(C)(C)C	d1921
	C1CC[C@@H]2C[NH+](CC[C@@H]2C1)C[C@@H]3CCCCC3=O	d1922
	CC(=O)c1ccc(cc1)c2cccc3c2cc[nH+]c3	d1923
	c1cc2c[nH+]ccc2c(c1)c3cc(ccc3F)C=O	d1924
	c1ccc2=[NH+][C@H]3[C@H]4[C@@H]5CC=CC[C@@H]5CN4CCC3=c2c1	d1925
	C[C@@H]1CC[C@@]2([C@@H]3C(=c4ccccc4=[NH+]3)CCN2C1)C	d1926
	CC(C)(C)[C@H]1[C@H]2C(=c3ccccc3=[NH+]2)CCN1C	d1927
	CC(=O)c1ccccc1c2c[nH+]cc3c2cccc3	d1928
	CC(C)c1[nH+]ccn1Cc2ccc(cc2Cl)F	d1929
	Cc1cc(c[nH+]c1N2CCC[C@H](C2)Cl)Br	d1930
	Cc1cc(c[nH+]c1N2C[C@@H]([C@H](C2)C)C)CCl	d1931
	C[C@@H](c1cc[nH+]cc1)C(=O)c2c(cccc2Cl)F	d1932
	C[C@@H](c1cc[nH+]cc1)C(=O)c2ccc(cc2F)Cl	d1933
	Cc1cc(sc1Br)C[NH+]2C[C@H](OC[C@@H]2C)C	d1934
	CC1CCC(CC1)[NH+]2CCN(CC2)CC(C)(C)C	d1935
	CC(C)c1ncc(s1)C[NH+]2CC(C2(C)C)(C)C	d1936
	CC[C@@H]1CN2CCCC[C@@H]2C[NH+]1[C@@H]3CCC[C@@H]3C	d1937
	C[C@@H]1CN2CCCC[C@@H]2C[NH+]1CC3(CCCC3)C	d1938
	C[C@H]1CCCC[C@H]1C[NH+]2CCN3CCCC[C@@H]3C2	d1939
	CC[C@H]1CN2CCCC[C@@H]2C[NH+]1C(C)(C)CC	d1940
	C[C@H]1CN2CCC[C@@H]2C[NH+]1C3CCCCCCC3	d1941
	CCC(C)(C)[NH+]1C[C@@H]2CCCN2C[C@@H]1C(C)C	d1942
	CC[C@H]1CN2CCC[C@@H]2C[NH+]1C3CCCCCC3	d1943
	CC[C@H]1CCCC[C@H]1[NH+]2C[C@@H]3CCCN3C[C@@H]2C	d1944
	C[C@H]1CCCC[C@@H]1C[NH+]2CCCN3CCC[C@@H]3C2	d1945
	C[C@@H](C1CCCCC1)[NH+]2CCCN3CCC[C@@H]3C2	d1946
	C[C@@H]1CCCC[C@H]1C[NH+]2C[C@@H]3CCCN3C[C@@H]2C	d1947
	C[C@H]1CCCCC[C@@H]1N2C[C@@H]3CCC[NH+]3C[C@@H]2C	d1948
	CN1CCC(CC1)C2=c3cc(ccc3=[NH+]C2)Br	d1949
	CN(C)c1ccc(cc1)/C=[NH+]\c2ccc(cc2)F	d1950
Cc1cccc(c1)C2(CCCCC2)[NH+]3CCCC3	C1CCC(CC1)[NH+]2CS[C@@H]3[C@@H]2CCCC3	d1951
	c1ccc2c(c1)ccc([nH+]2)/C=C\c3ccc(cc3)Cl	d1952
	c1ccc2c(c1)c(c3ccccc3[nH+]2)CBr	d1953
	Cc1ccc(c(c1)C)/[NH+]=c/2\ccoc3c2cc(cc3)C	d1954
	CN1c2ccccc2C=CC1=C3C=[NH+]c4c3cccc4	d1955
	c1ccn2c(c1)c[nH+]c2c3cccc(c3)Br	d1956
	CC(C)(C)c1cn2cc(ccc2[nH+]1)Br	d1957
	C[C@@H]1CC[C@H]([C@@H](C1)[NH+]2CC[C@@H]3CCCC[C@@H]3C2)C#N	d1958
	CCC(C)(C)[C@H]1CC[C@H]([C@@H](C1)[NH+](C)CC)C#N	d1959
	CC[C@@H]1CC[C@@H]([C@@H](C1)[NH+](C)C2CCCC2)C#N	d1960
	CC[C@H]1CC[C@@H]([C@@H](C1)[NH+](C)C2CCCC2)C#N	d1961
	Cn1c2cccc(c2[nH+]c1c3cccc(c3)CCl)F	d1962
	Cc1ccc(cc1)/[NH+]=C/c2ccc(cc2)N(C)C	d1963
	Cc1ccc(cc1)/[NH+]=C\c2ccc(cc2)N(C)C	d1964
	C[C@@H](C(C)C)[NH+](C)Cc1ccccc1Br	d1965
	CC(C)[NH+](CC1CC1)[C@@H]2CCCCC[C@@H]2C#N	d1966
	CC[C@@H]1CC[C@@H]([C@@H](C1)[NH+](C)[C@@H]2CCCC[C@@H]2C)C#N	d1967
	C[C@H]1CC[C@@H]([C@@H](C1)[NH+](C)[C@@H](C)C(C)(C)C)C#N	d1968
	CN1CCC2=c3ccccc3=[NH+][C@H]2[C@@H]1C4CCCCC4	d1969
	CC(C)[C@H]1CCC[NH+](CC1)CCBr	d1970
	CC(C)(C)[C@H]1CCC[NH+](CC1)CCCBr	d1971
	CC[C@H](C[NH+]1C[C@H](C[C@@H](C1)C)C)CBr	d1972
	CC1CC[NH+](CC1)C[C@@H](CBr)C(C)C	d1973
	C[C@H]1CC[NH+](C1)C[C@@H](CBr)C(C)C	d1974
	C[C@@H](C[NH+](C)Cc1cc(ccc1Cl)Cl)Cl	d1975
	C[C@H]1C[C@@H]1C[NH+](C)Cc2ccc(s2)Br	d1976
	CC[C@H]1CCC[NH+](CC1)CC(C)(C)CBr	d1977
	C[C@@H](c1cc[nH+]cc1)[C@H](CC(C)C)Br	d1978
	CCC(C)(C)[C@H]([C@H](C)c1cc[nH+]cc1)Br	d1979
	Cc1ccc[nH+]c1C[C@H](CC(C)C)Br	d1980
	Cc1ccc([nH+]c1)C[C@H](CC(C)(C)C)Br	d1981
	C[C@@H]1C[NH+](C[C@@H]1C)C[C@@H](CBr)C(C)(C)C	d1982
	C[C@@H]1CCC[C@@H]([NH+]1C[C@@H](CS)C(C)(C)C)C	d1983
	CC(C)(C[NH+]1CC[C@@H]2CCCC[C@@H]2C1)CS	d1984
	C[C@H]1CCCC[C@H]1[NH+](C)CC(C)(C)CS	d1985
	Cc1ccc2cc(ccc2[nH+]1)[C@H](C)[C@@H](C)Br	d1986
	C[C@@H](c1ccc2ccc[nH+]c2c1)[C@H](C)Br	d1987
	CC[C@@H](CCc1cccc2c1ccc[nH+]2)Br	d1988
	C[C@@H](C[C@@H](C)Br)c1cccc2c1ccc[nH+]2	d1989
	C[C@H](Cc1cc[nH+]c2c1cccc2)C[C@H](C)Cl	d1990
	C[C@H](Cc1ccccc1)/[NH+]=C/c2ccccc2F	d1991
	Cc1cc[nH+]cc1CC[C@H](c2ccccc2)Cl	d1992
	C[C@H](c1cc[nH+]cc1)[C@@H](c2ccccc2Cl)Cl	d1993
	c1ccc2c(c1)cc(s2)[C@@H](Cc3cccc[nH+]3)Cl	d1994
	CC(C)/C(=C\c1cc[nH+]c2c1cccc2)/CCl	d1995
	C[C@@H]1CN2CCCC[C@@H]2C[NH+]1C[C@@H](C)C(C)C	d1996
	CC(C)(C)[C@@H](C[NH+]1CCC[C@@H]2[C@@H]1CCC2)CS	d1997
	C[C@H]1CCCC[C@@H]1[NH+](C)CC2(CCCC2)CS	d1998
	C[NH+](C)Cc1ccc(cc1)Sc2ccc(cc2)Cl	d1999
[truncated: 1 more rows]
